# Supplementary material for: Enantioselectivity switch in asymmetric Michael addition reactions using phosphonium salts
Source: Royal Society of Chemistry journal article supplement (doi:10.1039/d1ob01027a), 2021-01-01
Supplement: d1ob01027a1.pdf [file d1ob01027a1.pdf]

# Supplementary Information

## **Enantioselective Switch in Asymmetric Michael Addition**

### **Reactions using Phosponium Salts**

Guosheng Fang,<sup>a</sup> Hongyu Wang,<sup>b</sup> Changwu Zheng,<sup>b</sup> Lu Pan,<sup>b</sup> and Gang Zhao\*<sup>a, b</sup>

<sup>a</sup> Department of Chemistry, University of Science and Technology of China, Hefei 230026, Anhui, China

<sup>b</sup> Center for Excellence in Molecular Synthesis, Key Laboratory of Synthetic Chemistry of Natural Substances, Shanghai Institute of Organic Chemistry, Chinese Academy of Sciences, 345 LingLing Road, Shanghai 200032, China

Fax: (+86)-21-6416-6128; E-mail: zhaog@sioc.ac.cn

## Contents

|                                                                                                                     |     |
|---------------------------------------------------------------------------------------------------------------------|-----|
| The optimization of other reaction conditions.....                                                                  | 3   |
| Synthesis of the catalysts <b>3</b> .....                                                                           | 5   |
| Synthesis of the substrate <b>1</b> .....                                                                           | 7   |
| The spectral data of the products <b>4</b> .....                                                                    | 8   |
| Synthesis of compound ( <i>S</i> )- <b>5</b> .....                                                                  | 22  |
| Synthesis of compound ( <i>S</i> )- <b>6</b> .....                                                                  | 22  |
| Synthesis of compound ( <i>R</i> )- <b>7</b> and ( <i>R</i> )- <b>8</b> .....                                       | 23  |
| References.....                                                                                                     | 24  |
| Copies of NMR spectra and HPLC traces.....                                                                          | 26  |
| The single crystal data of catalyst <b>3e</b> and the product ( <i>S</i> )- <b>4i</b> produced in condition B. .... | 114 |

## The optimization of other reaction conditions

**Table S1:** Optimization of other reaction conditions A.<sup>a</sup>

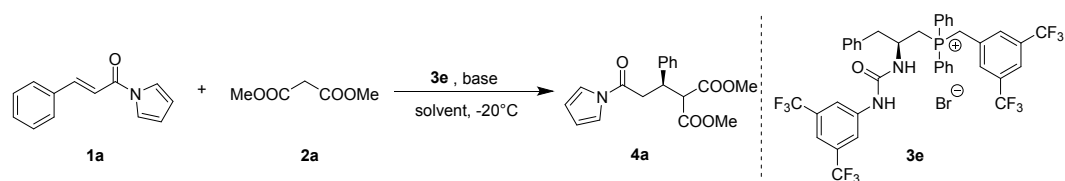

| Entry                 | Solvent           | Base                            | <i>t</i> (h) | Yield <sup>b</sup> (%) | <i>R/S</i> | ee <sup>c</sup> |
|-----------------------|-------------------|---------------------------------|--------------|------------------------|------------|-----------------|
| 1 <sup>d</sup>        | toluene           | K <sub>2</sub> CO <sub>3</sub>  | 6            | 92                     | <i>R</i>   | 83%             |
| 2 <sup>e</sup>        | toluene           | K <sub>2</sub> CO <sub>3</sub>  | 12           | 93                     | <i>R</i>   | 85%             |
| 3                     | toluene           | K <sub>2</sub> CO <sub>3</sub>  | 17           | 95                     | <i>R</i>   | 89%             |
| 4                     | m-Xylene          | K <sub>2</sub> CO <sub>3</sub>  | 16           | 92                     | <i>R</i>   | 91%             |
| 5                     | mesitylene        | K <sub>2</sub> CO <sub>3</sub>  | 22           | 97                     | <i>R</i>   | 94%             |
| 6                     | Et <sub>2</sub> O | K <sub>2</sub> CO <sub>3</sub>  | 21           | 92                     | <i>R</i>   | 82%             |
| 7                     | TBME              | K <sub>2</sub> CO <sub>3</sub>  | 17           | 95                     | <i>R</i>   | 83%             |
| 8                     | mesitylene        | Cs <sub>2</sub> CO <sub>3</sub> | 17           | 93                     | <i>R</i>   | 91%             |
| 9                     | mesitylene        | CsF                             | 12           | 91                     | <i>R</i>   | 93%             |
| 10                    | mesitylene        | KF                              | 24           | trace                  | -          | -               |
| 11                    | mesitylene        | K <sub>2</sub> HPO <sub>4</sub> | 24           | trace                  | -          | -               |
| 12                    | mesitylene        | K <sub>3</sub> PO <sub>4</sub>  | 21           | 94                     | <i>R</i>   | 93%             |
| 13                    | mesitylene        | NaOH                            | 8            | 91                     | <i>R</i>   | 92%             |
| 14                    | mesitylene        | <i>t</i> BuOK                   | 24           | trace                  | -          | -               |
| 15 <sup>f</sup>       | mesitylene        | <i>t</i> BuOK                   | 2.5          | 94                     | <i>R</i>   | 94%             |
| 16 <sup>g</sup>       | mesitylene        | <i>t</i> BuOK                   | 4.5          | 92                     | <i>R</i>   | 93%             |
| 17 <sup>f</sup>       | mesitylene        | <i>t</i> BuOLi                  | 24           | 41                     | <i>R</i>   | 41%             |
| 18 <sup>f</sup>       | mesitylene        | <i>t</i> BuONa                  | 6            | 93                     | <i>R</i>   | 91%             |
| 19 <sup>f, h</sup>    | mesitylene        | <i>t</i> BuOK                   | 2.5          | 92                     | <i>R</i>   | 94.4%           |
| 20 <sup>f, h, i</sup> | mesitylene        | <i>t</i> BuOK                   | 7            | 89                     | <i>R</i>   | 94%             |

<sup>a</sup> Unless otherwise noted, the reaction was performed with 0.1 mmol of **1a**, 0.2 mmol of **2a**, 3 equiv. of base, 3 mol% of **3e**, 1 mL of toluene, at -20 °C. Experiment process: **1a**, **2a** and **3e** were solved in mesitylene firstly at -20 °C. The mixture was stirred for 10 min, then *t*BuOK was added.

<sup>b</sup> Isolated yield. <sup>c</sup> Determined by HPLC using chiral stationary phase. <sup>d</sup> 0.5 mmol of **2a** was used, reaction was performed at 0 °C. <sup>e</sup> Reaction was performed at 0 °C. <sup>f</sup> 0.02 mmol of base was used. <sup>g</sup>

0.005 mmol of base was used. <sup>h</sup> Experiment process: **2a** and *t*BuOK were solved in mesitylene firstly at -20 °C. The mixture was stirred for 20 min, then **3e** and **1a** were added. <sup>i</sup> 1 mol% of **3e** was used.

**Table S2:** Optimization of other reaction conditions B.<sup>a</sup>

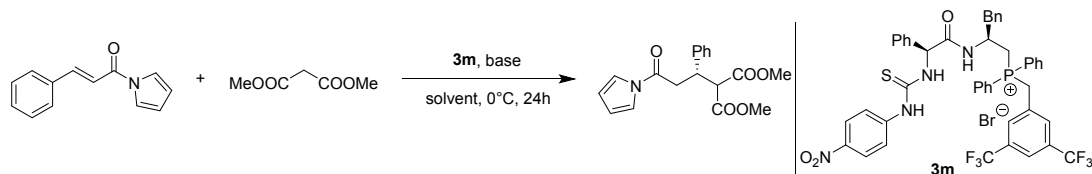

| Entry           | Solvent    | Base                            | <i>t</i> (h) | Yield <sup>b</sup> (%) | <i>R/S</i> | ee <sup>c</sup> |
|-----------------|------------|---------------------------------|--------------|------------------------|------------|-----------------|
| 1               | toluene    | K <sub>2</sub> CO <sub>3</sub>  | 24           | 92                     | <i>S</i>   | 99%             |
| 2               | m-Xylene   | K <sub>2</sub> CO <sub>3</sub>  | 17           | 90                     | <i>S</i>   | 98%             |
| 3               | mesitylene | K <sub>2</sub> CO <sub>3</sub>  | 20           | 91                     | <i>S</i>   | 99%             |
| 4               | TBME       | K <sub>2</sub> CO <sub>3</sub>  | 36           | 80                     | <i>S</i>   | 94%             |
| 5               | mesitylene | Cs <sub>2</sub> CO <sub>3</sub> | 14           | 95                     | <i>S</i>   | 84%             |
| 6               | mesitylene | CsF                             | 15           | 91                     | <i>S</i>   | 88%             |
| 7               | mesitylene | KF                              | 24           | trace                  | -          | -               |
| 8               | mesitylene | K <sub>2</sub> HPO <sub>4</sub> | 24           | trace                  | -          | -               |
| 9               | mesitylene | K <sub>3</sub> PO <sub>4</sub>  | 24           | 90                     | <i>S</i>   | 99%             |
| 10              | mesitylene | NaOH                            | 24           | 93                     | <i>S</i>   | 89%             |
| 11 <sup>d</sup> | mesitylene | <i>t</i> BuOK                   | 24           | 92                     | <i>S</i>   | 96%             |
| 12 <sup>e</sup> | mesitylene | K <sub>2</sub> CO <sub>3</sub>  | 11           | 90                     | <i>S</i>   | 96%             |
| 13 <sup>f</sup> | mesitylene | K <sub>2</sub> CO <sub>3</sub>  | 48           | 88                     | <i>S</i>   | 98%             |
| 14 <sup>g</sup> | mesitylene | K <sub>2</sub> CO <sub>3</sub>  | 48           | 89                     | <i>S</i>   | 99%             |
| 15 <sup>h</sup> | mesitylene | K <sub>2</sub> CO <sub>3</sub>  | 41           | 92                     | <i>S</i>   | 96%             |
| 16 <sup>i</sup> | mesitylene | K <sub>2</sub> CO <sub>3</sub>  | 13           | 93                     | <i>S</i>   | 98%             |

<sup>a</sup> Unless otherwise noted, the reaction was performed with 0.1 mmol of **1a**, 0.5 mmol of **2a**, 3 equiv. of K<sub>2</sub>CO<sub>3</sub>, 3 mol% of **3m**, 1 mL of toluene, at 0 °C. <sup>b</sup> Isolated yield. <sup>c</sup> Determined by HPLC using chiral stationary phase. <sup>d</sup> 0.02 mmol of base was used. <sup>e</sup> Reaction was performed at rt. <sup>f</sup> 0.01 mmol of K<sub>2</sub>CO<sub>3</sub> was used. <sup>g</sup> The reaction was performed with 0.2 mmol of **2a**. <sup>h</sup> The reaction was performed with 1 mol% of **3m**. <sup>i</sup> The reaction was performed with 5 mol% of **3m**.

### Synthesis of the catalysts 3.

Phase-transfer catalysts **3a-3d**<sup>1</sup> and **3h-3m**<sup>2</sup> have been described, and the catalysts **3e-3g** were synthesized according to procedures reported previously.<sup>1</sup>

#### (*S*)-(3,5-bis(trifluoromethyl)benzyl)(2-(3-(3,5-bis(trifluoromethyl)phenyl)ureido)-3-phenylpropyl)diphenylphosphonium bromide (**3e**)

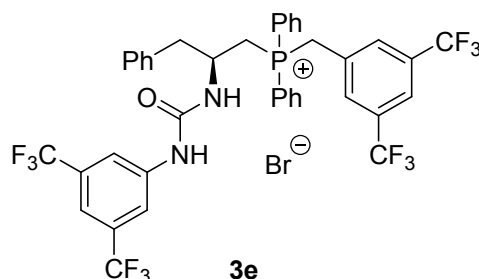

White solid, m.p. 114-115 °C; <sup>1</sup>H NMR (CDCl<sub>3</sub>, 400 MHz) δ 8.78 (s 1H), 7.78 (s, 2H), 7.72 (dd, *J* = 12.8, 7.6 Hz, 2H), 7.54-7.59 (m, 4H), 7.46-7.50 (m, 2H), 7.30-7.39 (m, 5H), 7.09-7.21 (m, 7H), 5.21 (t, *J* = 14.8 Hz, 1H), 4.58 (t, *J* = 14.8 Hz, 1H), 4.20-4.31 (m, 1H), 3.98-4.07 (m, 1H), 3.12-3.18 (m, 1H), 2.87 (dd, *J* = 13.2, 9.6 Hz, 1H), 2.73 (t, *J* = 14.0 Hz, 1H); <sup>13</sup>C NMR (CDCl<sub>3</sub>, 100 MHz) δ 154.4, 141.0, 137.0, 135.2 (d, *J*<sub>C-P</sub> = 2.8 Hz), 133.6 (d, *J*<sub>C-P</sub> = 9.7 Hz), 133.2 (d, *J*<sub>C-P</sub> = 9.2 Hz), 132.2 (q, *J*<sub>C-F</sub> = 33.6 Hz), 131.8, 131.5, 130.6 (2C), 130.4, 130.3, 130.2, 129.4, 129.0, 127.4, 123.4 (q, *J*<sub>C-F</sub> = 271.0 Hz), 122.5 (q, *J*<sub>C-F</sub> = 271.4 Hz), 122.2 (m), 118.0, 116.3, 116.0, 115.4, 115.2, 114.9, 114.8, 47.0 (d, *J*<sub>C-P</sub> = 4.6 Hz), 43.5 (d, *J*<sub>C-P</sub> = 13.6 Hz), 30.4 (d, *J*<sub>C-P</sub> = 46.5 Hz), 25.7 (d, *J*<sub>C-P</sub> = 50.7 Hz); <sup>19</sup>F NMR (CDCl<sub>3</sub>, 376 MHz) δ -62.9, -63.2; <sup>31</sup>P NMR (CDCl<sub>3</sub>, 162 MHz) δ 24.9; IR (Neat): 3217, 3061, 1694, 1569, 1474, 1439, 1389, 1373, 1278, 1133, 902, 881, 741, 704; HRMS (ESI): calcd for [M-Br]<sup>+</sup> (C<sub>39</sub>H<sub>30</sub>F<sub>12</sub>N<sub>2</sub>OP)<sup>+</sup> requires 801.1899; found 801.1899; [α]<sub>D</sub><sup>25</sup> = -25.8 (*c* = 1.0, CHCl<sub>3</sub>).

#### (*S*)-(3,5-bis(trifluoromethyl)benzyl)(2-(3-(4-nitrophenyl)ureido)-3-phenylpropyl)diphenylphosphonium bromide (**3f**)

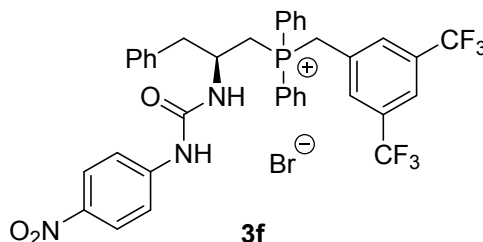

Yellow solid, m.p. 116-117 °C; <sup>1</sup>H NMR (CDCl<sub>3</sub>, 400 MHz) δ 8.90 (s 1H), 7.98 (s, 2H), 7.73 (dd, *J* = 12.8, 7.6 Hz, 2H), 7.54-7.62 (m, 3H), 7.37-7.51 (m, 7H), 7.31 (s 2H), 7.08-7.20 (m, 7H), 5.14 (t, *J* = 14.8 Hz, 1H), 4.54 (t, *J* = 14.8 Hz, 1H), 4.21-4.33 (m, 1H), 3.96-4.05 (m, 1H), 3.10-3.16 (m, 1H), 2.82-2.88 (m, 1H), 2.68 (t, *J* = 14.0 Hz, 1H); <sup>13</sup>C NMR (CDCl<sub>3</sub>, 100 MHz) δ 154.1, 145.9, 141.7, 136.9, 135.3 (q, *J*<sub>C-F</sub> = 2.9 Hz), 133.6 (d, *J*<sub>C-P</sub> = 9.7 Hz), 133.1 (d, *J*<sub>C-P</sub> = 9.2 Hz), 132.2 (q,

$J_{C-F} = 33.6$  Hz), 130.6, 130.5, 130.4, 130.3, 130.2, 129.4, 129.0, 127.2, 124.9, 122.5 (q,  $J_{C-F} = 271.3$  Hz), 122.3 (m), 117.4, 116.0 (d,  $J_{C-P} = 7.4$  Hz), 115.2 (d,  $J_{C-P} = 6.1$  Hz), 46.9 (d,  $J_{C-P} = 4.7$  Hz), 43.6 (d,  $J_{C-P} = 13.7$  Hz), 30.4 (d,  $J_{C-P} = 46.6$  Hz), 25.4 (d,  $J_{C-P} = 50.4$  Hz);  $^{19}\text{F NMR}$  ( $\text{CDCl}_3$ , 376 MHz)  $\delta$  -63.1;  $^{31}\text{P NMR}$  ( $\text{CDCl}_3$ , 162 MHz)  $\delta$  24.7; **IR** (Neat): 3207, 3060, 1698, 1597, 1557, 1505, 1438, 1373, 1329, 1303, 1279, 1232, 1177, 1137, 1110, 902, 854, 740, 705; **HRMS** (ESI): calcd for  $[\text{M-Br}]^+$  ( $\text{C}_{37}\text{H}_{31}\text{F}_6\text{N}_3\text{OP}$ ) $^+$  requires 710.2002; found 710.2002;  $[\alpha]_{\text{D}}^{25} = -20.0$  ( $c = 1.0$ ,  $\text{CHCl}_3$ ).

**(S)-(3,5-bis(trifluoromethyl)benzyl)(2-(3-(3,5-dimethylphenyl)ureido)-3-phenylpropyl)diphenylphosphonium bromide (3g)**

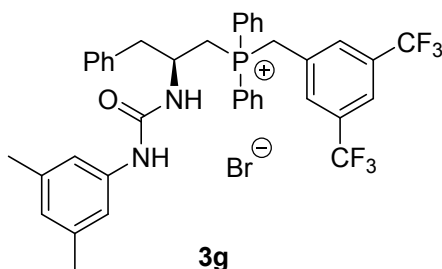

Yellow solid, m.p. 120-121 °C;  $^1\text{H NMR}$  ( $\text{CDCl}_3$ , 400 MHz)  $\delta$  7.86 (s 1H), 7.74-7.79 (m, 2H), 7.63-7.66 (m, 3H), 7.56-7.59 (m, 2H), 7.41-7.46 (m, 2H), 7.15-7.35 (m, 10H), 6.98 (s 2H), 6.59 (s 1H), 5.29 (td,  $J = 15.2, 6.0$  Hz, 1H), 4.63 (t,  $J = 14.8$  Hz, 1H), 4.28-4.40 (m, 1H), 4.04-4.15 (m, 1H), 3.17-3.24 (m, 1H), 2.87-2.93 (m, 1H), 2.70-2.78 (m, 1H), 2.22 (s 6H);  $^{13}\text{C NMR}$  ( $\text{CDCl}_3$ , 100 MHz)  $\delta$  154.9, 139.1, 138.1, 137.4, 135.2 (3C), 135.1, 133.6 (d,  $J_{C-P} = 9.6$  Hz), 133.2 (d,  $J_{C-P} = 9.1$  Hz), 132.1 (q,  $J_{C-F} = 33.8$  Hz), 130.9, 130.8, 130.7, 130.4, 130.3, 130.1, 129.5, 128.9, 126.9, 123.9, 122.5 (q,  $J_{C-F} = 271.4$  Hz), 122.1 (m), 116.5, 116.4, 116.0, 115.6, 115.1, 46.9 (d,  $J_{C-P} = 4.7$  Hz), 43.8 (d,  $J_{C-P} = 13.9$  Hz), 30.0 (d,  $J_{C-P} = 45.9$  Hz), 25.7 (d,  $J_{C-P} = 50.4$  Hz), 21.3;  $^{19}\text{F NMR}$  ( $\text{CDCl}_3$ , 376 MHz)  $\delta$  -63.1;  $^{31}\text{P NMR}$  ( $\text{CDCl}_3$ , 162 MHz)  $\delta$  25.4; **IR** (Neat): 3265, 3027, 2920, 1683, 1613, 1559, 1438, 1373, 1332, 1278, 1235, 1177, 1138, 921, 902, 839, 740, 705; **HRMS** (ESI): calcd for  $[\text{M-Br}]^+$  ( $\text{C}_{39}\text{H}_{36}\text{F}_6\text{N}_2\text{OP}$ ) $^+$  requires 693.2364; found 693.2364;  $[\alpha]_{\text{D}}^{25} = -17.7$  ( $c = 1.0$ ,  $\text{CHCl}_3$ ).

**(S)-(3,5-bis(trifluoromethyl)benzyl)(2-(3-(3,5-bis(trifluoromethyl)phenyl)-1-methylureido)-3-phenylpropyl)diphenylphosphonium bromide (3n)**

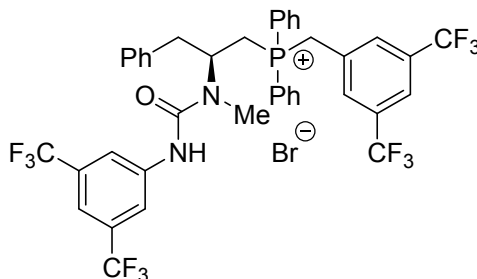

White solid, m.p. 103-104 °C;  $^1\text{H NMR}$  ( $\text{CDCl}_3$ , 400 MHz)  $\delta$  8.08-8.11 (m, 4H), 7.99 (s, 1H), 7.68-7.73 (m, 2H), 7.63 (t,  $J = 5.6$  Hz, 1H), 7.51-7.56 (m, 4H), 7.41-7.46 (m, 3H), 7.26-7.29 (m, 3H), 7.20-7.21 (m, 2H), 7.02-7.09 (m, 2H), 5.66 (t,  $J = 11.2$  Hz, 1H), 4.86-5.07 (m, 1H), 4.70-4.77 (m, 1H), 4.47-4.64 (m, 1H), 3.19 (s, 3H), 2.97 (d,  $J = 4.8$  Hz, 2H), 2.71 (t,  $J = 11.6$  Hz, 1H);  $^{13}\text{C NMR}$  ( $\text{CDCl}_3$ , 100 MHz)  $\delta$  155.2, 140.9, 136.7, 135.1 (d,  $J_{C-P} = 12.0$  Hz), 133.8 (d,  $J_{C-P} = 10.2$  Hz), 133.1

(d,  $J_{C-P} = 8.7$  Hz), 132.1 (2C), 131.8 (2C), 131.7, 131.5, 131.2, 131.1, 131.0 (2C), 130.9, 130.8, 130.7 (2C), 130.3, 130.1, 130.0, 129.5, 128.9, 127.2, 123.4 (q,  $J_{C-F} = 271.0$  Hz), 122.5 (q,  $J_{C-F} = 271.8$  Hz), 121.9 (m), 120.3, 119.3, 118.5, 116.3, 116.1, 115.8, 115.7, 115.0, 114.9, 51.2, 40.7 (d,  $J_{C-P} = 13.7$  Hz), 30.9 (d,  $J_{C-P} = 47.2$  Hz), 29.4 (d,  $J_{C-P} = 38.2$  Hz), 22.4;  **$^{19}F$  NMR** (CDCl<sub>3</sub>, 376 MHz)  $\delta$  -62.9, -63.2;  **$^{31}P$  NMR** (CDCl<sub>3</sub>, 162 MHz)  $\delta$  24.9; **IR** (Neat): 2910, 1691, 1374, 1278, 1178, 1134, 742, 704, 683; **HRMS** (ESI): calcd for [M-Br]<sup>+</sup> (C<sub>40</sub>H<sub>32</sub>F<sub>12</sub>N<sub>2</sub>OP)<sup>+</sup> requires 815.2055; found 815.2055;  $[\alpha]_D^{25} = -38.0$  ( $c = 1.0$ , CHCl<sub>3</sub>).

## Synthesis of the substrate 1.

Compounds **1a-3c**,<sup>3</sup> **1d**,<sup>4</sup> **1e**,<sup>3</sup> **1f**,<sup>3</sup> **1g-1i**,<sup>4</sup> **1j**,<sup>5</sup> **1l**,<sup>5</sup> **1m**,<sup>3</sup> **1n**,<sup>3</sup> **1o**,<sup>6</sup> **1p**,<sup>7</sup> **3q**,<sup>3</sup> **3r**,<sup>3</sup> **3t**,<sup>3</sup> **3u**,<sup>3</sup> **3v**,<sup>8</sup> and **3x**<sup>9</sup> were known. **3k**,<sup>6</sup> **3n**,<sup>1</sup> **3s**,<sup>4</sup> and **3w**<sup>3</sup> were also synthesized according to procedures reported previously.

### (*E*)-3-(3,4-dichlorophenyl)-1-(1H-pyrrol-1-yl)prop-2-en-1-one (**1k**)

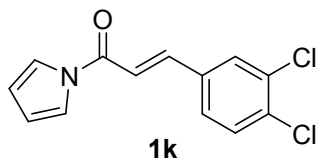

White solid, m.p. 145-146 °C;  **$^1H$  NMR** (CDCl<sub>3</sub>, 400 MHz)  $\delta$  7.87 (d,  $J = 15.6$  Hz, 1H), 7.71 (d,  $J = 2.0$  Hz, 1H), 7.51 (d,  $J = 8.0$  Hz, 1H), 7.43-7.46 (m, 3H), 7.12 (d,  $J = 15.6$  Hz, 1H), 6.38 (t,  $J = 2.4$  Hz, 2H);  **$^{13}C$  NMR** (CDCl<sub>3</sub>, 100 MHz)  $\delta$  162.3, 144.6, 134.9, 134.2, 133.4, 131.0, 129.7, 127.5, 119.2, 117.5, 113.7; **IR** (Neat): 1682, 1626, 1552, 1470, 1409, 1387, 1353, 1308, 1285, 1263, 1247, 1206, 1132, 1073, 1209, 974, 941, 851, 816, 749, 722; **HRMS** (ESI): calcd for [M+H]<sup>+</sup> (C<sub>13</sub>H<sub>10</sub>Cl<sub>2</sub>NO)<sup>+</sup> requires 266.0134; found requires 266.0132.

### Ethyl (*E*)-4-oxo-4-(1H-pyrrol-1-yl)but-2-enoate (**1s**)

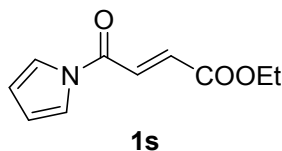

Light yellow solid, m.p. 72-73 °C;  **$^1H$  NMR** (CDCl<sub>3</sub>, 400 MHz)  $\delta$  7.60 (d,  $J = 15.2$  Hz, 1H), 7.40 (t,  $J = 2.0$  Hz, 2H), 7.10 (d,  $J = 15.2$  Hz, 1H), 6.38 (t,  $J = 2.0$  Hz, 2H), 4.31 (q,  $J = 7.2$  Hz, 2H), 1.36 (t,  $J = 7.2$  Hz, 3H);  **$^{13}C$  NMR** (CDCl<sub>3</sub>, 100 MHz)  $\delta$  164.7, 161.2, 135.6, 131.3, 119.4, 114.3, 61.6, 14.1; **IR** (Neat): 3145, 2977, 1714, 1692, 1646, 1474, 1409, 1368, 1355, 1310, 1280, 1186, 1134, 1117, 1089, 1056, 963, 937, 875, 755, 722; **HRMS** (ESI): calcd for [M+H]<sup>+</sup> (C<sub>10</sub>H<sub>12</sub>NO<sub>3</sub>)<sup>+</sup> requires

194.0812; found requires 194.0814.

**(E)-1-(9H-fluoren-9-yl)but-2-en-1-one (1w)**

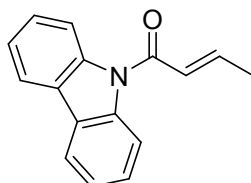

White solid, m.p. 57-58 °C; **<sup>1</sup>H NMR** (CDCl<sub>3</sub>, 400 MHz) δ 8.10 (d, *J* = 8.0 Hz, 2H), 8.00 (d, *J* = 7.6 Hz, 2H), 7.45-7.49 (m, 2H), 7.36-7.39 (m, 2H), 7.23-7.32 (m, 1H), 6.80-6.85 (m, 1H), 3.11 (dd, *J* = 7.2, 1.6 Hz, 3H); **<sup>13</sup>C NMR** (CDCl<sub>3</sub>, 100 MHz) δ 166.1, 145.5, 138.5, 127.0, 126.1, 126.0, 123.3, 119.9, 115.6, 18.6; **IR** (Neat): 3059, 1681, 1641, 1597, 1584, 1489, 1478, 1443, 1357, 1331, 1308, 1294, 1270, 1237, 1215, 1166, 1121, 1094, 1036, 1023, 977, 940, 891, 824, 806, 753, 723; **HRMS** (ESI): calcd for [M+H]<sup>+</sup> (C<sub>16</sub>H<sub>14</sub>NO)<sup>+</sup> requires 236.1075; found requires 236.1071.

## The spectral data of the products 4.

**Dimethyl 2-(3-oxo-1-phenyl-3-(1H-pyrrol-1-yl)propyl)malonate (4a)**

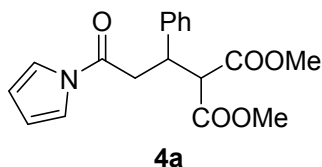

White solid, m.p. 93-94 °C; **<sup>1</sup>H NMR** (CDCl<sub>3</sub>, 400 MHz) δ 7.19-7.28 (m, 7H), 6.25 (s, 2H), 4.11-4.16 (m, 1H), 3.87 (d, *J* = 9.2 Hz, 1H), 3.73 (s, 3H), 3.42-3.51 (m, 4H), 3.30 (dd, *J* = 16.4, 9.2 Hz, 1H); **<sup>13</sup>C NMR** (CDCl<sub>3</sub>, 100 MHz) δ 168.5, 168.1, 167.9, 139.5, 128.6, 127.9, 127.5, 119.0, 113.1, 56.8, 52.7, 52.5, 41.0, 38.4; **IR** (Neat): 2953, 1735, 1596, 1469, 1455, 1435, 1374, 1281, 1198, 1157, 1120, 1075, 1021, 960, 924, 744, 701; **HRMS** (ESI): calcd for [M+H]<sup>+</sup> (C<sub>18</sub>H<sub>20</sub>NO<sub>5</sub>)<sup>+</sup> requires 330.1336; found 330.1336; HPLC analysis Daicel Chiralpak AD-H, flow rate = 1.0 mL/min, λ = 254 nm, hexane/isopropanol = 80:20; Condition A : (*R*)-**4a**, 92% yield (30.4 mg), 94% ee, [α]<sub>D</sub><sup>25</sup> = -22.9 (*c* = 1.0, CHCl<sub>3</sub>), retention time 14.9 min (major) and 18.9 min (minor); Condition B: (*S*)-**4a**, 91% yield (30.1 mg), 99% ee, [α]<sub>D</sub><sup>25</sup> = +25.0 (*c* = 1.0, CHCl<sub>3</sub>); retention time 14.6 min (minor) and 18.8 min (major).

**Diethyl 2-(3-oxo-1-phenyl-3-(1H-pyrrol-1-yl)propyl)malonate (4b)**



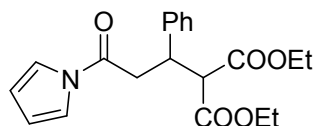

**4b**

White solid, m.p. 105-106 °C;  $^1\text{H NMR}$  ( $\text{CDCl}_3$ , 400 MHz)  $\delta$  7.18-7.29 (m, 7H), 6.25 (t,  $J = 2.0$  Hz, 2H), 4.09-4.27 (m, 3H), 3.96 (q,  $J = 7.2$  Hz, 2H), 3.83 (d,  $J = 9.6$  Hz, 1H), 3.45 (dd,  $J = 16.0$ , 4.0 Hz, 1H), 3.28 (dd,  $J = 16.0$ , 9.6 Hz, 1H), 1.24 (t,  $J = 6.8$  Hz, 3H), 1.01 (t,  $J = 7.2$  Hz, 3H);  $^{13}\text{C NMR}$  ( $\text{CDCl}_3$ , 100 MHz)  $\delta$  168.2, 168.1, 167.5, 139.5, 128.5, 128.1, 127.5, 119.0, 113.1, 61.8, 61.5, 57.1, 41.1, 38.7, 14.0, 13.7; **IR** (Neat): 2982, 2936, 1729, 1496, 1469, 1455, 1405, 1369, 1281, 1249, 1174, 1119, 1095, 1074, 1029, 921, 863, 744, 700; **HRMS** (ESI): calcd for  $[\text{M}+\text{H}]^+$  ( $\text{C}_{20}\text{H}_{24}\text{NO}_5$ )<sup>+</sup> requires 358.1649; found 358.1649; HPLC analysis Daicel Chiralpak AD-H, flow rate = 1.0 mL/min,  $\lambda = 254$  nm, hexane/isopropanol = 80:20; Condition A : (*R*)-**4b**, 91% yield (32.3 mg), 96% ee,  $[\alpha]_{\text{D}}^{25} = -18.2$  ( $c = 1.0$ ,  $\text{CHCl}_3$ ), retention time 13.2 min (major) and 25.3 min (minor); Condition B: (*S*)-**4b**, 93% yield (33.2 mg), 98% ee,  $[\alpha]_{\text{D}}^{25} = +20.0$  ( $c = 1.0$ ,  $\text{CHCl}_3$ ); retention time 13.2 min (minor) and 25.1 min (major).

#### Dibutyl 2-(3-oxo-1-phenyl-3-(1H-pyrrol-1-yl)propyl)malonate (4c)

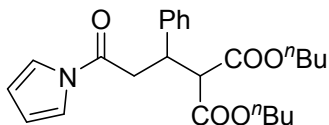

**4c**

White solid, m.p. 69-70 °C;  $^1\text{H NMR}$  ( $\text{CDCl}_3$ , 400 MHz)  $\delta$  7.18-7.28 (m, 7H), 6.25 (t,  $J = 2.0$  Hz, 2H), 4.09-4.20 (m, 3H), 3.84-3.92 (m, 3H), 3.45 (dd,  $J = 16.4$ , 4.4 Hz, 1H), 3.28 (dd,  $J = 16.0$ , 9.6 Hz, 1H), 1.55-1.62 (m, 2H), 1.28-1.40 (m, 4H), 1.14-1.24 (m, 2H), 0.91 (t,  $J = 7.6$  Hz, 3H), 0.83 (t,  $J = 7.6$  Hz, 3H);  $^{13}\text{C NMR}$  ( $\text{CDCl}_3$ , 100 MHz)  $\delta$  168.3, 168.1, 167.6, 139.6, 128.5, 128.0, 127.5, 119.0, 113.1, 65.6, 65.3, 57.2, 41.1, 38.7, 30.4, 30.2, 19.0, 18.9, 13.6, 13.5; **IR** (Neat): 2960, 2934, 2874, 1730, 1469, 1406, 1374, 1281, 1248, 1170, 1119, 1073, 923, 743, 700; **HRMS** (ESI): calcd for  $[\text{M}+\text{H}]^+$  ( $\text{C}_{24}\text{H}_{32}\text{NO}_5$ )<sup>+</sup> requires 414.2275; found 414.2275; HPLC analysis Daicel Chiralpak AD-H, flow rate = 1.0 mL/min,  $\lambda = 254$  nm, hexane/isopropanol = 80:20; Condition A : (*R*)-**4c**, 99% yield (40.9 mg), 94% ee,  $[\alpha]_{\text{D}}^{25} = -12.8$  ( $c = 1.0$ ,  $\text{CHCl}_3$ ), retention time 8.0 min (major) and 15.5 min (minor); Condition B: (*S*)-**4c**, 99% yield (40.8 mg), 99% ee,  $[\alpha]_{\text{D}}^{25} = +14.2$  ( $c = 1.0$ ,  $\text{CHCl}_3$ ); retention time 8.0 min (minor) and 15.4 min (major).

#### Dimethyl 2-(3-oxo-1-phenyl-3-(1H-pyrrol-1-yl)propyl)malonate (4d)

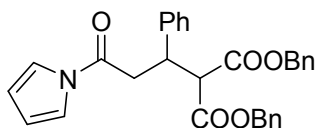

**4d**

White solid, m.p. 99-100 °C;  $^1\text{H NMR}$  ( $\text{CDCl}_3$ , 400 MHz)  $\delta$  7.19-7.30 (m, 15H), 7.05-7.07 (m,

2H), 6.22 (t,  $J = 2.4$  Hz, 2H), 5.10-5.18 (m, 2H), 4.91 (s, 2H), 4.13-4.18 (m, 1H), 3.95 (d,  $J = 9.2$  Hz, 1H), 3.34 (dd,  $J = 16.4, 4.4$  Hz, 1H), 3.24 (dd,  $J = 16.4, 9.2$  Hz, 1H);  $^{13}\text{C NMR}$  ( $\text{CDCl}_3$ , 100 MHz)  $\delta$  168.0, 167.8, 167.2, 139.4, 135.0, 134.9, 128.6, 128.6, 128.5 (2C), 128.3 (2C), 128.2, 128.0, 127.5, 119.0, 113.1, 67.5, 67.3, 57.1, 41.0, 38.3; **IR** (Neat): 3064, 3032, 2954, 1731, 1497, 1469, 1455, 1374, 1281, 1215, 1152, 1120, 1002, 956, 924, 743; **HRMS** (ESI): calcd for  $[\text{M}+\text{H}]^+$  ( $\text{C}_{30}\text{H}_{28}\text{NO}_5$ ) $^+$  requires 482.1962; found 482.1960; HPLC analysis Daicel Chiralpak AD-H, flow rate = 1.0 mL/min,  $\lambda = 254$  nm, hexane/isopropanol = 50:50; Condition A : (*R*)-**4d**, 93% yield (44.6 mg), 91% ee,  $[\alpha]_{\text{D}}^{25} = -5.3$  ( $c = 1.0$ ,  $\text{CHCl}_3$ ), retention time 16.6 min (major) and 30.8 min (minor); Condition B: (*S*)-**4d**, 90% yield (43.2 mg), 98% ee,  $[\alpha]_{\text{D}}^{25} = +5.9$  ( $c = 1.0$ ,  $\text{CHCl}_3$ ); retention time 17.0 min (minor) and 31.3 min (major).

#### Dimethyl 2-fluoro-2-(3-oxo-1-phenyl-3-(1H-pyrrol-1-yl)propyl)malonate (**4e**)

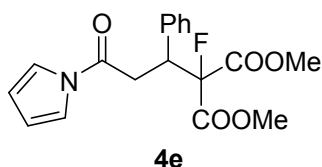

White solid, m.p. 117-118 °C;  $^1\text{H NMR}$  ( $\text{CDCl}_3$ , 400 MHz)  $\delta$  7.34-7.36 (m, 2H), 7.24-7.31 (m, 5H), 6.26 (t,  $J = 2.4$  Hz, 2H), 4.47 (ddd,  $J_{\text{H-F}} = 32.0$  Hz,  $J = 9.6, 3.6$  Hz, 1H); 3.88 (s, 3H), 3.55 (s, 3H), 3.44 (dd,  $J = 16.8, 9.6$  Hz, 1H), 3.32 (dd,  $J = 17.2, 4.0$  Hz, 1H);  $^{13}\text{C NMR}$  ( $\text{CDCl}_3$ , 100 MHz)  $\delta$  167.3, 165.7 (d,  $J_{\text{C-F}} = 25.7$  Hz), 164.9 (d,  $J_{\text{C-F}} = 26.2$  Hz), 136.1, 129.1 (d,  $J_{\text{C-F}} = 2.1$  Hz), 128.6, 126.2, 119.0, 113.3, 97.0 (d,  $J_{\text{C-F}} = 205.1$  Hz), 53.8, 53.1, 45.3 (d,  $J_{\text{C-F}} = 18.4$  Hz), 35.7 (d,  $J_{\text{C-F}} = 4.7$  Hz);  $^{19}\text{F NMR}$  ( $\text{CDCl}_3$ , 376 MHz)  $\delta$  -173.5 (d,  $J_{\text{C-F}} = 32.0$  Hz); **IR** (Neat): 2955, 1756, 17116, 1470, 1455, 1435, 1406, 1374, 1318, 1284, 1247, 1148, 1121, 1090, 1074, 1049, 961, 920, 744, 701; **HRMS** (ESI): calcd for  $[\text{M}+\text{H}]^+$  ( $\text{C}_{18}\text{H}_{19}\text{FNO}_5$ ) $^+$  requires 348.1242; found 348.1245; HPLC analysis Daicel Chiralpak AS-H, flow rate = 1.0 mL/min,  $\lambda = 254$  nm, hexane/isopropanol = 80:20; Condition A : (*S*)-**4e**, 92% yield (31.8 mg), 99% ee,  $[\alpha]_{\text{D}}^{25} = -45.9$  ( $c = 1.0$ ,  $\text{CHCl}_3$ ), retention time 10.2 min (minor) and 14.5 min (major); Condition B: (*R*)-**4e**, 97% yield (33.8 mg), 97% ee,  $[\alpha]_{\text{D}}^{25} = +41.9$  ( $c = 1.0$ ,  $\text{CHCl}_3$ ); retention time 9.9 min (major) and 13.8 min (minor).

#### Dimethyl 2-methyl-2-(3-oxo-1-phenyl-3-(1H-pyrrol-1-yl)propyl)malonate (**4f**)

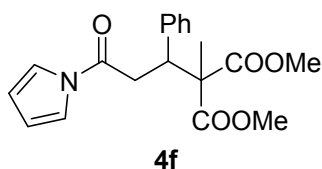

White solid, m.p. 86-87 °C;  $^1\text{H NMR}$  ( $\text{CDCl}_3$ , 400 MHz)  $\delta$  7.33 (s, 2H), 7.19-7.28 (m, 5H), 6.25 (s, 2H), 4.10 (dd,  $J = 9.6, 4.0$  Hz, 1H), 3.76 (s, 3H), 3.67 (s, 3H), 3.47-3.59 (m, 2H), 1.41 (s, 3H);  $^{13}\text{C NMR}$  ( $\text{CDCl}_3$ , 100 MHz)  $\delta$  171.9, 171.6, 168.5, 137.9, 129.1, 128.4, 127.7, 119.1, 112.9, 57.8, 52.7, 52.6, 46.1, 37.3, 19.6; **IR** (Neat): 2952, 1734, 1468, 1454, 1435, 1380, 1322, 1248, 1158, 1104,

1075, 965, 923, 747, 703; **HRMS** (ESI): calcd for  $[M+H]^+$  ( $C_{19}H_{22}NO_5$ )<sup>+</sup> requires 344.1492; found 344.1492; HPLC analysis Daicel Chiralpak AD-H, flow rate = 1.0 mL/min,  $\lambda$  = 254 nm, hexane/isopropanol = 80:20; Condition A : (*S*)-**4f**, 87% yield (29.9 mg), 48% ee,  $[\alpha]_D^{25} = -14.9$  ( $c = 1.0$ ,  $CHCl_3$ ), retention time 7.6 min (major) and 11.8 min (minor); Condition B: (*R*)-**4f**, 93% yield (31.8 mg), 98% ee,  $[\alpha]_D^{25} = +30.8$  ( $c = 1.0$ ,  $CHCl_3$ ); retention time 7.8 min (minor) and 12.4 min (major).

**Diethyl 2-(1-(4-fluorophenyl)-3-oxo-3-(1H-pyrrol-1-yl)propyl)malonate (4g)**

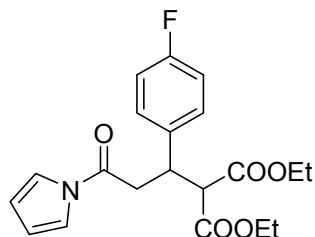

**4g**

White solid, m.p. 71-72 °C; **<sup>1</sup>H NMR** ( $CDCl_3$ , 400 MHz)  $\delta$  7.23-7.28 (m, 4H), 6.96 (t,  $J = 8.8$  Hz, 2H), 6.26 (t,  $J = 2.4$  Hz, 2H), 4.17-4.27 (m, 2H), 4.08-4.15 (m, 1H), 3.98 (q,  $J = 7.2$  Hz, 2H), 3.79 (d,  $J = 9.6$  Hz, 1H), 3.44 (dd,  $J = 16.0, 4.0$  Hz, 1H), 3.24 (dd,  $J = 16.0, 10.0$  Hz, 1H), 1.25 (t,  $J = 7.2$  Hz, 3H), 1.04 (t,  $J = 7.2$  Hz, 3H); **<sup>13</sup>C NMR** ( $CDCl_3$ , 100 MHz)  $\delta$  168.0 (2C), 167.4, 161.9 (d,  $J_{C-F} = 244.8$  Hz), 135.2, 129.8 (d,  $J_{C-F} = 8.1$  Hz), 119.0, 115.4 (d,  $J_{C-F} = 21.3$  Hz), 113.3, 61.9, 61.6, 57.1, 40.4, 38.8, 14.0, 13.8; **<sup>19</sup>F NMR** ( $CDCl_3$ , 376 MHz)  $\delta$  -114.8; **IR** (Neat): 2983, 2937, 1730, 1605, 1512, 1470, 1406, 1370, 1290, 1228, 1161, 1119, 1101, 1075, 1029, 919, 839, 744; **HRMS** (ESI): calcd for  $[M+H]^+$  ( $C_{20}H_{23}FNO_5$ )<sup>+</sup> requires 376.1555; found 376.1555; HPLC analysis Daicel Chiralpak AD-H, flow rate = 1.0 mL/min,  $\lambda$  = 254 nm, hexane/isopropanol = 80:20; Condition A : (*R*)-**4g**, 94 yield (35.1 mg), 96% ee,  $[\alpha]_D^{25} = -18.6$  ( $c = 1.0$ ,  $CHCl_3$ ), retention time 13.0 min (major) and 32.0 min (minor); Condition B: (*S*)-**4g**, 91% yield (34.0 mg), 99% ee,  $[\alpha]_D^{25} = +19.7$  ( $c = 1.0$ ,  $CHCl_3$ ); retention time 13.2 min (minor) and 32.7 min (major).

**Diethyl 2-(1-(4-chlorophenyl)-3-oxo-3-(1H-pyrrol-1-yl)propyl)malonate (4h)**

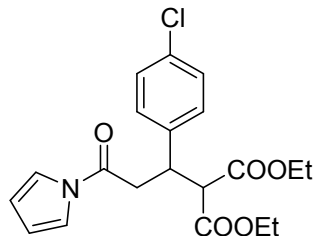

**4h**

White solid, m.p. 112-113 °C; **<sup>1</sup>H NMR** ( $CDCl_3$ , 400 MHz)  $\delta$  7.20-7.28 (m, 6H), 6.26 (t,  $J = 2.4$  Hz, 2H), 4.15-4.27 (m, 2H), 4.07-4.13 (m, 1H), 3.99 (q,  $J = 7.2$  Hz, 2H), 3.79 (d,  $J = 9.6$  Hz, 1H), 3.44 (dd,  $J = 16.4, 4.0$  Hz, 1H), 3.25 (dd,  $J = 16.4, 10.0$  Hz, 1H), 1.25 (t,  $J = 7.2$  Hz, 3H), 1.05 (t,  $J = 7.2$  Hz, 3H); **<sup>13</sup>C NMR** ( $CDCl_3$ , 100 MHz)  $\delta$  168.0, 167.9, 167.3, 138.1, 133.3, 129.6, 128.7,

119.0, 113.3, 61.9, 61.7, 56.9, 40.4, 38.5, 14.0, 13.8; **IR** (Neat): 2982, 2936, 1729, 1492, 1469, 1407, 1369, 1286, 1249, 1175, 1120, 1108, 1094, 1075, 1014, 919, 829, 744; **HRMS** (ESI): calcd for  $[M+H]^+$  ( $C_{20}H_{23}ClNO_5$ )<sup>+</sup> requires 392.1259; found 392.1259; HPLC analysis Daicel Chiralpak AD-H, flow rate = 1.0 mL/min,  $\lambda$  = 254 nm, hexane/isopropanol = 70:30; Condition A : (*R*)-**4h**, 96% yield (37.5 mg), 96% ee,  $[\alpha]_D^{25} = -15.0$  ( $c = 1.0$ ,  $CHCl_3$ ), retention time 11.1 min (major) and 25.6 min (minor); Condition B: (*S*)-**4h**, 96% yield (37.6 mg), 99% ee,  $[\alpha]_D^{25} = +15.7$  ( $c = 1.0$ ,  $CHCl_3$ ); retention time 11.2 min (minor) and 26.1 min (major).

**Diethyl 2-(1-(4-bromophenyl)-3-oxo-3-(1H-pyrrol-1-yl)propyl)malonate (4i)**

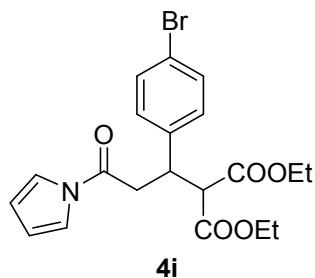

White solid, m.p. 106-107 °C; **<sup>1</sup>H NMR** ( $CDCl_3$ , 400 MHz)  $\delta$  7.33 (d,  $J = 8.4$  Hz, 2H), 7.21 (s, 2H), 7.09 (d,  $J = 8.4$  Hz, 2H), 6.19 (t,  $J = 2.0$  Hz, 2H), 4.07-4.20 (m, 2H), 3.99-4.04 (m, 1H), 3.92 (q,  $J = 7.2$  Hz, 2H), 3.72 (d,  $J = 9.6$  Hz, 1H), 3.37 (dd,  $J = 16.4, 4.0$  Hz, 1H), 3.18 (dd,  $J = 16.0, 9.6$  Hz, 1H), 1.18 (t,  $J = 7.2$  Hz, 3H), 0.99 (t,  $J = 7.2$  Hz, 3H); **<sup>13</sup>C NMR** ( $CDCl_3$ , 100 MHz)  $\delta$  167.9 (2C), 167.3, 138.6, 131.7, 129.9, 121.4, 119.0, 113.3, 61.9, 61.7, 56.8, 40.5, 38.4, 14.0, 13.8; **IR** (Neat): 2982, 2934, 1728, 1488, 1469, 1408, 1369, 1285, 1249, 1175, 1119, 1074, 1029, 1010, 919, 824, 744, 716; **HRMS** (ESI): calcd for  $[M+H]^+$  ( $C_{20}H_{23}BrNO_5$ )<sup>+</sup> requires 436.0754; found 436.0755; HPLC analysis Daicel Chiralpak AD-H, flow rate = 1.0 mL/min,  $\lambda$  = 254 nm, hexane/isopropanol = 70:30; Condition A : (*R*)-**4i**, 99% yield (43.1 mg), 96% ee,  $[\alpha]_D^{25} = -13.1$  ( $c = 1.0$ ,  $CHCl_3$ ), retention time 11.6 min (major) and 26.3 min (minor); Condition B: (*S*)-**4i**, 99% yield (43.5 mg), 99% ee,  $[\alpha]_D^{25} = +13.8$  ( $c = 1.0$ ,  $CHCl_3$ ); retention time 11.7 min (minor) and 26.6 min (major).

**Diethyl 2-(3-oxo-3-(1H-pyrrol-1-yl)-1-(p-tolyl)propyl)malonate (4j)**

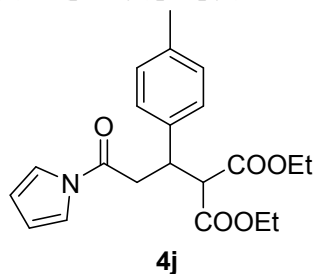

White solid, m.p. 92-93 °C; **<sup>1</sup>H NMR** ( $CDCl_3$ , 400 MHz)  $\delta$  7.29 (s, 2H), 7.14 (d,  $J = 8.0$  Hz, 2H), 7.07 (d,  $J = 8.0$  Hz, 2H), 6.25 (t,  $J = 2.0$  Hz, 2H), 4.16-4.27 (m, 2H), 4.05-4.11 (m, 1H), 3.97 (q,  $J = 7.2$  Hz, 2H), 3.80 (d,  $J = 9.6$  Hz, 1H), 3.43 (dd,  $J = 16.0, 4.0$  Hz, 1H), 3.25 (dd,  $J = 16.0, 9.6$  Hz, 1H), 2.27 (s, 3H), 1.25 (t,  $J = 7.2$  Hz, 3H), 1.04 (t,  $J = 7.2$  Hz, 3H); **<sup>13</sup>C NMR** ( $CDCl_3$ , 100 MHz)  $\delta$  168.3, 168.2, 167.5, 137.1, 136.4, 129.2, 127.9, 119.0, 113.1, 61.8, 61.5, 57.3, 40.7, 38.8, 21.1, 14.0,

13.8; **IR** (Neat): 2982, 2935, 1730, 1515, 1469, 1405, 1369, 1283, 1249, 1175, 1115, 1074, 1030, 920, 817, 744; **HRMS** (ESI): calcd for  $[M+H]^+$  ( $C_{21}H_{26}NO_5$ )<sup>+</sup> requires 372.1805; found 372.1806; HPLC analysis Daicel Chiralpak AD-H, flow rate = 1.0 mL/min,  $\lambda$  = 254 nm, hexane/isopropanol = 70:30; Condition A : (*R*)-**4j**, 92% yield (34.3 mg), 97% ee,  $[\alpha]_D^{25} = -10.8$  ( $c = 1.0$ ,  $CHCl_3$ ), retention time 9.4 min (major) and 18.3 min (minor); Condition B: (*S*)-**4j**, 90% yield (33.3 mg), er 99% ee,  $[\alpha]_D^{25} = +11.6$  ( $c = 1.0$ ,  $CHCl_3$ ); retention time 9.5 min (minor) and 18.5 min (major).

**Diethyl 2-(1-(4-methoxyphenyl)-3-oxo-3-(1H-pyrrol-1-yl)propyl)malonate (4k)**

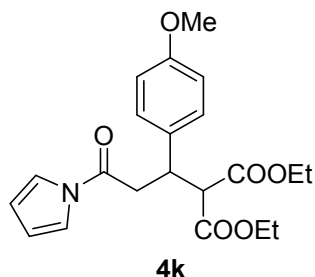

White solid, m.p. 107-108 °C; **<sup>1</sup>H NMR** ( $CDCl_3$ , 400 MHz)  $\delta$  7.29 (t,  $J = 2.0$  Hz, 2H), 7.18 (d,  $J = 8.4$  Hz, 2H), 6.79 (d,  $J = 8.4$  Hz, 2H), 6.25 (t,  $J = 2.0$  Hz, 2H), 4.15-4.27 (m, 2H), 4.04-4.10 (m, 1H), 3.97 (q,  $J = 7.2$  Hz, 2H), 3.79 (d,  $J = 9.6$  Hz, 1H), 3.75 (s, 3H), 3.42 (dd,  $J = 16.0, 4.0$  Hz, 1H), 3.23 (dd,  $J = 16.0, 10.0$  Hz, 1H), 1.25 (t,  $J = 7.2$  Hz, 3H), 1.04 (t,  $J = 7.2$  Hz, 3H); **<sup>13</sup>C NMR** ( $CDCl_3$ , 100 MHz)  $\delta$  168.3, 168.2, 167.5, 158.7, 131.3, 129.1, 119.0, 113.9, 113.1, 61.8, 61.5, 57.3, 55.1, 40.4, 39.0, 14.0, 13.8; **IR** (Neat): 2982, 2936, 1729, 1612, 1584, 1514, 1469, 1405, 1369, 1288, 1251, 1179, 1113, 1074, 1032, 919, 862, 833, 744; **HRMS** (ESI): calcd for  $[M+H]^+$  ( $C_{21}H_{26}NO_6$ )<sup>+</sup> requires 388.1755; found 388.1755; HPLC analysis Daicel Chiralpak AD-H, flow rate = 1.0 mL/min,  $\lambda$  = 254 nm, hexane/isopropanol = 60:40; Condition A : (*R*)-**4k**, 90% yield (34.9 mg), 97% ee,  $[\alpha]_D^{25} = -12.6$  ( $c = 1.0$ ,  $CHCl_3$ ), retention time 11.1 min (major) and 27.1 min (minor); Condition B: (*S*)-**4k**, 86% yield (33.1 mg), 99% ee,  $[\alpha]_D^{25} = +14.0$  ( $c = 1.0$ ,  $CHCl_3$ ); retention time 11.1 min (minor) and 27.2 min (major).

**Diethyl 2-(3-oxo-3-(1H-pyrrol-1-yl)-1-(4-(trifluoromethyl)phenyl)propyl)malonate (4l)**

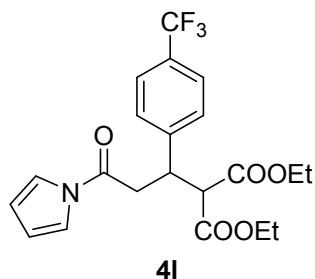

White solid, m.p. 118-119 °C; **<sup>1</sup>H NMR** ( $CDCl_3$ , 400 MHz)  $\delta$  7.47 (d,  $J = 8.0$  Hz, 2H), 7.25 (d,  $J = 8.0$  Hz, 2H), 7.20 (s, 2H), 6.19 (t,  $J = 2.0$  Hz, 2H), 4.08-4.20 (m, 3H), 3.91 (q,  $J = 7.2$  Hz, 2H), 3.77 (d,  $J = 9.6$  Hz, 1H), 3.41 (dd,  $J = 16.8, 4.0$  Hz, 1H), 3.25 (dd,  $J = 16.0, 9.6$  Hz, 1H), 1.17 (t,  $J = 7.2$  Hz, 3H), 0.95 (t,  $J = 7.2$  Hz, 3H); **<sup>13</sup>C NMR** ( $CDCl_3$ , 100 MHz)  $\delta$  167.8, 167.7, 167.2, 143.8, 129.7 (q,  $J_{C-F} = 32.4$  Hz), 128.6, 125.5 (q,  $J_{C-F} = 3.7$  Hz), 123.9 (q,  $J_{C-F} = 270.7$  Hz), 118.9, 113.4, 62.0,

61.7, 56.7, 40.7, 38.2, 13.9, 13.7; **<sup>19</sup>F NMR** (CDCl<sub>3</sub>, 376 MHz) δ -62.7; **IR** (Neat): 2984, 2940, 1730, 1619, 1470, 1422, 1407, 1370, 1326, 1282, 1250, 1166, 1114, 1070, 1018, 919, 845, 744; **HRMS** (ESI): calcd for [M+H]<sup>+</sup> (C<sub>21</sub>H<sub>23</sub>F<sub>3</sub>NO<sub>5</sub>)<sup>+</sup> requires 426.1523; found 426.1523; HPLC analysis Daicel Chiralpak AD-H, flow rate = 1.0 mL/min, λ = 254 nm, hexane/isopropanol = 70:30; Condition A : (*R*)-**4l**, 99% yield (41.9 mg), 96% ee, [α]<sub>D</sub><sup>25</sup> = -18.0 (*c* = 1.0, CHCl<sub>3</sub>), retention time 9.1 min (major) and 17.8 min (minor); Condition B: (*S*)-**4l**, 99% yield (41.8 mg), 98% ee, [α]<sub>D</sub><sup>25</sup> = +18.9 (*c* = 1.0, CHCl<sub>3</sub>); retention time 9.0 min (minor) and 17.6 min (major).

**Diethyl 2-(1-(4-(methoxycarbonyl)phenyl)-3-oxo-3-(1H-pyrrol-1-yl)propyl)malonate (4m)**

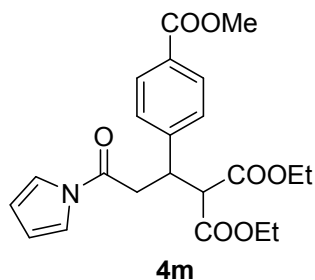

White solid, m.p. 132-133 °C; **<sup>1</sup>H NMR** (CDCl<sub>3</sub>, 400 MHz) δ 7.95 (d, *J* = 8.4 Hz, 2H), 7.36 (d, *J* = 8.4 Hz, 2H), 7.27 (s, 2H), 6.26 (t, *J* = 2.4 Hz, 2H), 4.13-4.27 (m, 3H), 3.97 (q, *J* = 7.2 Hz, 2H), 3.88 (s, 3H), 3.84 (d, *J* = 9.6 Hz, 1H), 3.48 (dd, *J* = 16.4, 4.0 Hz, 1H), 3.31 (dd, *J* = 16.4, 9.6 Hz, 1H), 1.24 (t, *J* = 7.2 Hz, 3H), 1.03 (t, *J* = 7.2 Hz, 3H); **<sup>13</sup>C NMR** (CDCl<sub>3</sub>, 100 MHz) δ 167.9, 167.8, 167.2, 166.7, 144.9, 129.8, 129.3, 128.3, 119.0, 113.3, 62.0, 61.7, 56.7, 52.1, 40.9, 38.3, 14.0, 13.8; **IR** (Neat): 2983, 1724, 1611, 1470, 1436, 1406, 1369, 1281, 1177, 1115, 1075, 1020, 920, 858, 775, 745, 707; **HRMS** (ESI): calcd for [M+H]<sup>+</sup> (C<sub>22</sub>H<sub>26</sub>NO<sub>7</sub>)<sup>+</sup> requires 416.1704; found 416.1704; HPLC analysis Daicel Chiralpak AD-H, flow rate = 1.0 mL/min, λ = 254 nm, hexane/isopropanol = 50:50; Condition A : (*R*)-**4m**, 99% yield (41.1 mg), 96% ee, [α]<sub>D</sub><sup>25</sup> = -15.2 (*c* = 1.0, CHCl<sub>3</sub>), retention time 21.3 min (major) and 35.8 min (minor); Condition B: (*S*)-**4m**, 87% yield (36.3 mg), 98% ee, [α]<sub>D</sub><sup>25</sup> = +18.0 (*c* = 1.0, CHCl<sub>3</sub>); retention time 22.6 min (minor) and 35.0 min (major).

**Diethyl 2-(1-(2-bromophenyl)-3-oxo-3-(1H-pyrrol-1-yl)propyl)malonate (4n)**

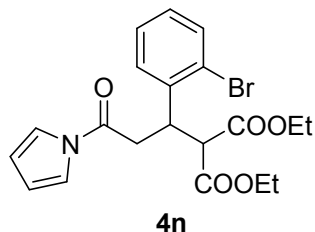

Colorless oil; **<sup>1</sup>H NMR** (CDCl<sub>3</sub>, 400 MHz) δ 7.55 (dd, *J* = 8.0, 0.8 Hz, 1H), 7.21-7.32 (m, 4H), 7.06-7.10 (m, 1H), 6.26 (t, *J* = 2.4 Hz, 2H), 4.59-4.64 (m, 1H), 4.03-4.24 (m, 5H), 3.43-3.55 (m, 2H), 1.21 (t, *J* = 7.2 Hz, 3H), 1.09 (t, *J* = 7.2 Hz, 3H); **<sup>13</sup>C NMR** (CDCl<sub>3</sub>, 100 MHz) δ 168.1 (2C), 167.5, 138.5, 133.5, 128.9, 127.6, 124.8, 119.1, 113.2, 61.8, 61.7, 55.0, 39.8, 36.7, 13.9, 13.8.; **IR** (Neat): 2982, 1730, 1470, 1442, 1405, 1369, 1341, 1283, 1247, 1176, 1116, 1095, 1074, 1026, 923, 744; **HRMS** (ESI): calcd for [M+H]<sup>+</sup> (C<sub>20</sub>H<sub>23</sub>BrNO<sub>5</sub>)<sup>+</sup> requires 436.0754; found 436.0753; HPLC

analysis Daicel Chiralpak AD-H, flow rate = 1.0 mL/min,  $\lambda$  = 254 nm, hexane/isopropanol = 70:30; Condition A : (*R*)-**4n**, 95% yield (41.5 mg), 73% ee,  $[\alpha]_{\text{D}}^{25} = -23.8$  ( $c = 1.0$ ,  $\text{CHCl}_3$ ), retention time 7.2 min (major) and 16.7 min (minor); Condition B: (*S*)-**4n**, 95% yield (41.5 mg), 96% ee,  $[\alpha]_{\text{D}}^{25} = +29.7$  ( $c = 1.0$ ,  $\text{CHCl}_3$ ); retention time 7.4 min (minor) and 17.2 min (major).

**Diethyl 2-(1-(3-bromophenyl)-3-oxo-3-(1H-pyrrol-1-yl)propyl)malonate (4o)**

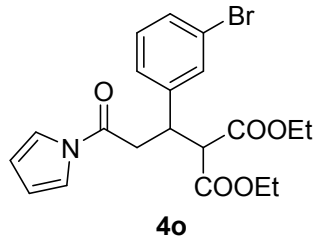

Light yellow oil;  $^1\text{H NMR}$  ( $\text{CDCl}_3$ , 400 MHz)  $\delta$  7.43 (s, 1H), 7.34-7.36 (m, 1H), 7.22-7.29 (m, 3H), 7.15 (t,  $J = 8.0$  Hz, 1H), 6.27 (t,  $J = 2.0$  Hz, 2H), 4.14-4.26 (m, 2H), 4.07-4.12 (m, 1H), 4.00 (q,  $J = 7.2$  Hz, 2H), 3.80 (d,  $J = 9.6$  Hz, 1H), 3.45 (dd,  $J = 16.4, 4.0$  Hz, 1H), 3.27 (dd,  $J = 16.4, 9.6$  Hz, 1H), 1.24 (t,  $J = 7.2$  Hz, 3H), 1.06 (t,  $J = 7.2$  Hz, 3H);  $^{13}\text{C NMR}$  ( $\text{CDCl}_3$ , 100 MHz)  $\delta$  167.9, 167.8, 167.3, 142.0, 131.2, 130.6, 130.1, 127.0, 122.5, 119.0, 113.3, 61.9, 61.7, 56.8, 40.5, 38.3, 14.0, 13.8; **IR** (Neat): 2982, 2937, 1728, 1568, 1470, 1430, 1406, 1369, 1283, 1249, 1176, 1120, 1097, 1075, 1029, 998, 920, 787, 744; **HRMS** (ESI): calcd for  $[\text{M}+\text{H}]^+$  ( $\text{C}_{20}\text{H}_{23}\text{BrNO}_5$ )<sup>+</sup> requires 436.0754; found 436.0753; HPLC analysis Daicel Chiralpak AD-H, flow rate = 1.0 mL/min,  $\lambda$  = 254 nm, hexane/isopropanol = 70:30; Condition A : (*R*)-**4o**, 95% yield (41.3 mg), 95% ee,  $[\alpha]_{\text{D}}^{25} = -19.9$  ( $c = 1.0$ ,  $\text{CHCl}_3$ ), retention time 8.7 min (major) and 10.5 min (minor); Condition B: (*S*)-**4o**, 98% yield (42.6 mg), 97% ee,  $[\alpha]_{\text{D}}^{25} = +20.8$  ( $c = 1.0$ ,  $\text{CHCl}_3$ ); retention time 8.8 min (minor) and 10.6 min (major).

**Diethyl 2-(1-(3,4-dichlorophenyl)-3-oxo-3-(1H-pyrrol-1-yl)propyl)malonate (4p)**

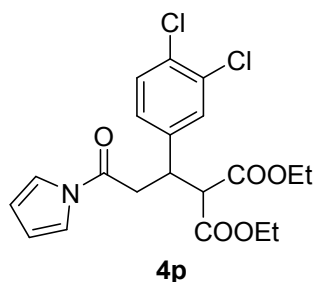

White solid, m.p. 63-64 °C;  $^1\text{H NMR}$  ( $\text{CDCl}_3$ , 400 MHz)  $\delta$  7.39 (d,  $J = 2.0$  Hz, 1H), 7.35 (d,  $J = 8.4$  Hz, 1H), 7.28 (s, 2H), 7.16 (dd,  $J = 8.4, 2.0$  Hz, 1H), 6.28 (t,  $J = 2.0$  Hz, 2H), 4.15-4.27 (m, 2H), 4.01-4.12 (m, 3H), 3.78 (d,  $J = 9.6$  Hz, 1H), 3.45 (dd,  $J = 16.8, 4.0$  Hz, 1H), 3.27 (dd,  $J = 16.8, 9.6$  Hz, 1H), 1.25 (t,  $J = 7.2$  Hz, 3H), 1.09 (t,  $J = 7.2$  Hz, 3H);  $^{13}\text{C NMR}$  ( $\text{CDCl}_3$ , 100 MHz)  $\delta$  167.8, 167.7, 167.2, 140.0, 132.5, 131.6, 130.5, 130.2, 127.8, 118.9, 113.4, 62.0, 61.8, 56.6, 40.0, 38.1, 14.0, 13.8; **IR** (Neat): 2982, 2937, 1729, 1470, 1407, 1369, 1285, 1176, 1154, 1119, 1074, 1030, 919, 743; **HRMS** (ESI): calcd for  $[\text{M}+\text{H}]^+$  ( $\text{C}_{20}\text{H}_{22}\text{Cl}_2\text{NO}_5$ )<sup>+</sup> requires 426.0870; found 426.0870; HPLC analysis Daicel Chiralpak AD-H, flow rate = 1.0 mL/min,  $\lambda$  = 254 nm, hexane/isopropanol

= 70:30; Condition A : (*R*)-**4p**, 96% yield (41.0 mg), 96% ee,  $[\alpha]_{\text{D}}^{25} = -20.5$  ( $c = 1.0$ ,  $\text{CHCl}_3$ ), retention time 9.1 min (major) and 14.0 min (minor); Condition B: (*S*)-**4p**, 92% yield (39.4 mg), 95% ee,  $[\alpha]_{\text{D}}^{25} = +21.1$  ( $c = 1.0$ ,  $\text{CHCl}_3$ ); retention time 9.1 min (minor) and 14.0 min (major)

#### Diethyl 2-(1-(furan-2-yl)-3-oxo-3-(1H-pyrrol-1-yl)propyl)malonate (**4q**)

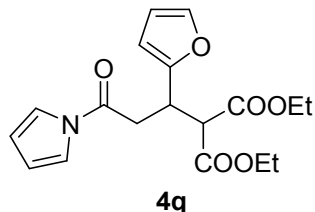

Colorless oil;  $^1\text{H NMR}$  ( $\text{CDCl}_3$ , 400 MHz)  $\delta$  7.30-7.32 (m, 3H), 6.25-6.28 (m, 3H), 6.16 (d,  $J = 3.2$  Hz, 1H), 4.16-4.29 (m, 3H), 4.11 (q,  $J = 7.2$  Hz, 2H), 3.91 (d,  $J = 8.0$  Hz, 1H), 3.39 (d,  $J = 6.8$  Hz, 2H), 1.24 (t,  $J = 7.2$  Hz, 3H), 1.17 (t,  $J = 7.2$  Hz, 3H);  $^{13}\text{C NMR}$  ( $\text{CDCl}_3$ , 100 MHz)  $\delta$  168.1, 167.8, 167.5, 152.6, 141.9, 119.0, 113.2, 110.3, 107.4, 61.8, 61.7, 54.8, 36.0, 34.6, 14.0, 13.9; **IR** (Neat): 2982, 2935, 1731, 1470, 1406, 1369, 1283, 1259, 1175, 1119, 1097, 1075, 1015, 920, 803, 743; **HRMS** (ESI): calcd for  $[\text{M}+\text{H}]^+$  ( $\text{C}_{18}\text{H}_{22}\text{NO}_6$ )<sup>+</sup> requires 348.1442; found 348.1443; HPLC analysis Daicel Chiralpak AD-H, flow rate = 1.0 mL/min,  $\lambda = 254$  nm, hexane/isopropanol = 70:30; Condition A : (*R*)-**4q**, 95% yield (33.1 mg), 93% ee,  $[\alpha]_{\text{D}}^{25} = -13.2$  ( $c = 1.0$ ,  $\text{CHCl}_3$ ), retention time 7.3 min (major) and 8.3 min (minor); Condition B: (*S*)-**4q**, 88% yield (30.5 mg), 98% ee,  $[\alpha]_{\text{D}}^{25} = +13.8$  ( $c = 1.0$ ,  $\text{CHCl}_3$ ); retention time 7.3 min (minor) and 8.8 min (major).

#### Diethyl 2-(3-oxo-3-(1H-pyrrol-1-yl)-1-(thiophen-2-yl)propyl)malonate (**4r**)

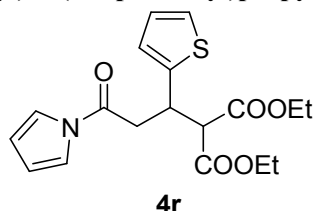

Light yellow solid, m.p. 80-81 °C;  $^1\text{H NMR}$  ( $\text{CDCl}_3$ , 400 MHz)  $\delta$  7.31 (s, 2H), 7.15 (d,  $J = 4.8$  Hz, 1H), 6.87-6.94 (m, 2H), 6.27 (s, 2H), 4.44-4.50 (m, 1H), 4.14-4.27 (m, 2H), 4.07 (q,  $J = 7.2$  Hz, 2H), 3.89 (d,  $J = 8.0$  Hz, 1H), 3.48 (dd,  $J = 16.4, 4.4$  Hz, 1H), 3.38 (dd,  $J = 16.4, 8.8$  Hz, 1H), 1.24 (t,  $J = 7.2$  Hz, 3H), 1.13 (t,  $J = 7.2$  Hz, 3H);  $^{13}\text{C NMR}$  ( $\text{CDCl}_3$ , 100 MHz)  $\delta$  167.9 (2C), 167.4, 142.6, 126.7, 126.0, 124.5, 119.0, 113.2, 61.8, 61.7, 57.4, 39.3, 36.3, 14.0, 13.8; **IR** (Neat): 2980, 2933, 1729, 1469, 1405, 1368, 1339, 1278, 1175, 1116, 1074, 1029, 920, 852, 746; **HRMS** (ESI): calcd for  $[\text{M}+\text{H}]^+$  ( $\text{C}_{18}\text{H}_{22}\text{NO}_5\text{S}$ )<sup>+</sup> requires 364.1213; found 364.1212; HPLC analysis Daicel Chiralpak AD-H, flow rate = 1.0 mL/min,  $\lambda = 254$  nm, hexane/isopropanol = 70:30; Condition A : (*R*)-**4r**, 91% yield (33.0 mg), 95% ee,  $[\alpha]_{\text{D}}^{25} = -27.9$  ( $c = 1.0$ ,  $\text{CHCl}_3$ ), retention time 9.2 min (major) and 13.7 min (minor); Condition B: (*S*)-**4r**, 94% yield (34.2 mg), 99% ee,  $[\alpha]_{\text{D}}^{25} = +28.2$  ( $c = 1.0$ ,  $\text{CHCl}_3$ ); retention time 9.2min (minor) and 13.7 min (major).

#### Diethyl 2-(1-(naphthalen-1-yl)-3-oxo-3-(1H-pyrrol-1-yl)propyl)malonate (**4s**)



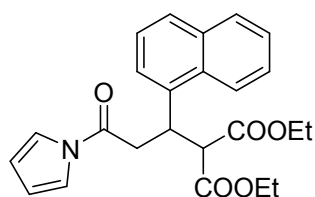

**4s**

Colorless oil;  $^1\text{H NMR}$  ( $\text{CDCl}_3$ , 400 MHz)  $\delta$  8.23 (d,  $J = 8.4$  Hz, 1H), 7.83 (d,  $J = 8.0$  Hz, 1H), 7.72 (d,  $J = 7.6$  Hz, 1H), 7.53-7.57 (m, 1H), 7.37-7.49 (m, 3H), 7.25-7.27 (m, 2H), 6.23 (s, 2H), 5.04-5.15 (m, 1H), 4.10-4.24 (m, 2H), 4.05 (d,  $J = 8.4$  Hz, 2H), 3.86-3.91 (m, 2H), 3.51-3.65 (m, 2H), 1.19 (t,  $J = 7.2$  Hz, 3H), 0.88 (t,  $J = 7.2$  Hz, 3H);  $^{13}\text{C NMR}$  ( $\text{CDCl}_3$ , 100 MHz)  $\delta$  168.4, 168.3, 167.6, 136.1, 134.0, 131.4, 128.9, 128.0, 126.5, 125.7, 125.1, 122.9, 119.0, 113.1, 110.0, 61.8, 61.6, 56.6, 38.3, 34.6, 13.9, 13.6. **IR** (Neat): 2981, 2936, 1728, 1597, 1512, 1469, 1405, 1368, 1340, 1283, 1176, 1119, 1096, 1073, 1030, 924, 861, 798, 778, 744; **HRMS** (ESI): calcd for  $[\text{M}+\text{H}]^+$  ( $\text{C}_{24}\text{H}_{26}\text{NO}_5$ ) $^+$  requires 408.1805; found 408.1805; HPLC analysis Daicel Chiralpak AD-H, flow rate = 1.0 mL/min,  $\lambda = 254$  nm, hexane/isopropanol = 70:30; Condition A : (*R*)-**4s**, 95% yield (38.8 mg), 95% ee,  $[\alpha]_{\text{D}}^{25} = -48.2$  ( $c = 1.0$ ,  $\text{CHCl}_3$ ), retention time 10.2 min (major) and 15.9 min (minor); Condition B: (*S*)-**4s**, 99% yield (40.2 mg), 97% ee,  $[\alpha]_{\text{D}}^{25} = +49.3$  ( $c = 1.0$ ,  $\text{CHCl}_3$ ); retention time 10.2min (minor) and 15.8 min (major).

**Diethyl 2-(5-oxo-1-phenyl-5-(1H-pyrrol-1-yl)pent-1-yn-3-yl)malonate (4t)**

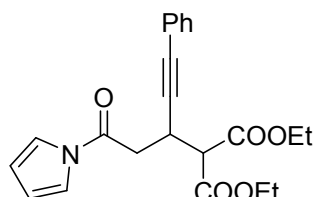

**4t**

White solid, m.p. 80-81 °C;  $^1\text{H NMR}$  ( $\text{CDCl}_3$ , 400 MHz)  $\delta$  7.24-7.38 (m, 7H), 6.31 (s, 2H), 4.22-4.29 (m, 4H), 4.00-4.07 (m, 1H), 3.84 (d,  $J = 7.2$  Hz, 1H), 3.26-3.40 (m, 2H), 1.25-1.30 (m, 6H);  $^{13}\text{C NMR}$  ( $\text{CDCl}_3$ , 100 MHz)  $\delta$  167.8, 167.4, 167.2, 131.7, 128.1, 122.6, 119.2, 113.4, 110.0, 87.0, 84.0, 61.9, 54.9, 37.4, 28.3, 14.1; **IR** (Neat): 2982, 2937, 1732, 1490, 1470, 1444, 1407, 1369, 1342, 1284, 1255, 1175, 1121, 1096, 1072, 1029, 921, 757, 744; **HRMS** (ESI): calcd for  $[\text{M}+\text{H}]^+$  ( $\text{C}_{22}\text{H}_{24}\text{NO}_5$ ) $^+$  requires 382.1649; found 382.1649; HPLC analysis Daicel Chiralpak AS-H + PC-II, flow rate = 1.0 mL/min,  $\lambda = 254$  nm, hexane/isopropanol = 90:10; Condition A : (*R*)-**4t**, 90% yield (34.4 mg), 92% ee,  $[\alpha]_{\text{D}}^{25} = +0.3$  ( $c = 1.0$ ,  $\text{CHCl}_3$ ), retention time 19.9 min (minor) and 21.6 min (major); Condition B: (*S*)-**4t**, 95% yield (36.2 mg), 91% ee,  $[\alpha]_{\text{D}}^{25} = -0.3$  ( $c = 1.0$ ,  $\text{CHCl}_3$ ); retention time 20.4 min (major) and 22.3 min (minor).

**Diethyl (E)-2-(5-oxo-1-phenyl-5-(1H-pyrrol-1-yl)pent-1-en-3-yl)malonate (4u)**

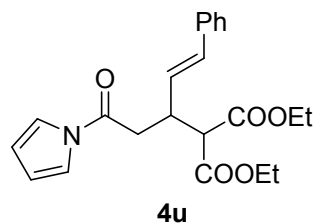

White solid, m.p. 126-127 °C; **<sup>1</sup>H NMR** (CDCl<sub>3</sub>, 400 MHz) δ 7.12-7.28 (m, 7H), 6.43 (d, *J* = 16.0 Hz, 1H), 6.13-6.22 (m, 3H), 4.02-4.20 (m, 4H), 3.67 (d, *J* = 7.6 Hz, 1H), 3.53-3.60 (m, 1H), 3.20 (dd, *J* = 16.0, 4.4 Hz, 1H), 3.04 (dd, *J* = 16.0, 8.0 Hz, 1H), 1.18 (t, *J* = 7.2 Hz, 3H), 1.12 (t, *J* = 7.2 Hz, 3H); **<sup>13</sup>C NMR** (CDCl<sub>3</sub>, 100 MHz) δ 168.4, 168.1, 168.0, 136.5, 133.3, 128.5, 127.7, 127.4, 126.4, 119.1, 113.3, 61.7, 61.6, 55.4, 39.2, 37.5, 14.0; **IR** (Neat): 2982, 1729, 1469, 1448, 1405, 1369, 1291, 1175, 1124, 1073, 1030, 968, 922, 744; **HRMS** (ESI): calcd for [M+H]<sup>+</sup> (C<sub>22</sub>H<sub>26</sub>NO<sub>5</sub>)<sup>+</sup> requires 384.1805; found 384.1806; HPLC analysis Daicel Chiralpak AD-H, flow rate = 1.0 mL/min, λ = 254 nm, hexane/isopropanol = 70:30; Condition A : (*S*)-**4u**, 86% yield (33.1 mg), 96% ee, [α]<sub>D</sub><sup>25</sup> = +3.3 (*c* = 1.0, CHCl<sub>3</sub>), retention time 8.9 min (major) and 10.8 min (minor); Condition B: (*R*)-**4u**, 80% yield (30.7 mg), 99% ee, [α]<sub>D</sub><sup>25</sup> = -3.5 (*c* = 1.0, CHCl<sub>3</sub>); retention time 8.9 min (minor) and 10.8 min (major).

#### Diethyl 2-(4-oxo-4-(1H-pyrrol-1-yl)butan-2-yl)malonate (**4v**)

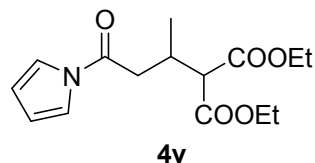

Colorless oil; **<sup>1</sup>H NMR** (CDCl<sub>3</sub>, 400 MHz) δ 7.30 (s, 2H), 6.22 (s, 2H), 4.09-4.18 (m, 4H), 3.41 (d, *J* = 6.8 Hz, 1H), 3.11 (dd, *J* = 16.0, 4.4 Hz, 1H), 2.81-2.91 (m, 1H), 2.70 (dd, *J* = 15.6, 8.8 Hz, 1H), 1.18-1.22 (m, 6H), 1.07 (d, *J* = 6.8 Hz, 3H); **<sup>13</sup>C NMR** (CDCl<sub>3</sub>, 100 MHz) δ 169.1, 168.4 (2C), 119.1, 113.1, 61.5, 56.2, 38.7, 29.9, 17.6, 14.0; **IR** (Neat): 2980, 2934, 1731, 1470, 1371, 1302, 1262, 1177, 1095, 1071, 1031, 931, 864, 801, 744; **HRMS** (ESI): calcd for [M+H]<sup>+</sup> (C<sub>15</sub>H<sub>22</sub>NO<sub>5</sub>)<sup>+</sup> requires 296.1492; found 296.1494; HPLC analysis Daicel Chiralpak IG, flow rate = 0.7 mL/min, λ = 214 nm, hexane/isopropanol = 90:10; Condition A : (*R*)-**4v**, 94% yield (27.8 mg), 82% ee, [α]<sub>D</sub><sup>25</sup> = -0.23 (*c* = 1.0, CHCl<sub>3</sub>), retention time 17.9 min (minor) and 18.9 min (major); Condition B: (*S*)-**4v**, 95% yield (28.1 mg), 94% ee, [α]<sub>D</sub><sup>25</sup> = +1.3 (*c* = 1.0, CHCl<sub>3</sub>); retention time 17.8 min (major) and 19.0 min (minor).

#### Diethyl 2-(1-oxo-1-(1H-pyrrol-1-yl)hexan-3-yl)malonate (**4w**)

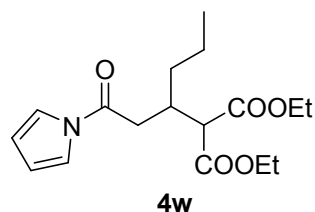

Colorless oil;  $^1\text{H NMR}$  ( $\text{CDCl}_3$ , 400 MHz)  $\delta$  7.37 (s, 2H), 6.29 (s, 2H), 4.16-4.23 (m, 4H), 3.66 (d,  $J = 4.8$  Hz, 1H), 3.20 (dd,  $J = 16.4, 4.4$  Hz, 1H), 2.80-2.94 (m, 2H), 1.33-1.53 (m, 4H), 1.23-1.29 (m, 6H), 0.91 (t,  $J = 7.2$  Hz, 3H);  $^{13}\text{C NMR}$  ( $\text{CDCl}_3$ , 100 MHz)  $\delta$  169.5, 168.8, 168.6, 119.1, 113.1, 61.5, 61.3, 53.7, 36.2, 34.2, 34.1, 20.1, 14.0, 14.0, 13.9; **IR** (Neat): 2960, 2929, 2873, 1731, 1469, 1405, 1369, 1261, 1157, 1099, 1072, 1030, 924, 802, 743; **HRMS** (ESI): calcd for  $[\text{M}+\text{H}]^+$  ( $\text{C}_{17}\text{H}_{26}\text{NO}_5$ ) $^+$  requires 324.1805; found 324.1806; HPLC analysis Daicel Chiralpak IG, flow rate = 0.7 mL/min,  $\lambda = 214$  nm, hexane/isopropanol = 90:10; Condition A : (*R*)-**4w**, 91% yield (29.5 mg), 78% ee,  $[\alpha]_{\text{D}}^{25} = -1.4$  ( $c = 1.0$ ,  $\text{CHCl}_3$ ), retention time 14.9 min (minor) and 16.2 min (major); Condition B: (*S*)-**4w**, 93% yield (30.2 mg), 96% ee,  $[\alpha]_{\text{D}}^{25} = +1.4$  ( $c = 1.0$ ,  $\text{CHCl}_3$ ); retention time 14.8 min (major) and 16.2 min (minor).

#### Triethyl 4-oxo-4-(1H-pyrrol-1-yl)butane-1,1,2-tricarboxylate (**4x**)

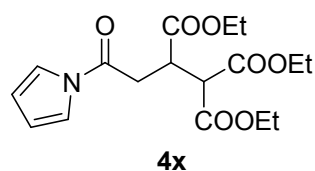

Colorless oil;  $^1\text{H NMR}$  ( $\text{CDCl}_3$ , 400 MHz)  $\delta$  7.32 (s, 2H), 6.30 (t,  $J = 2.0$  Hz, 2H), 4.13-4.25 (m, 6H), 4.04 (d,  $J = 6.0$  Hz, 1H), 3.77-3.82 (m, 1H), 3.48 (dd,  $J = 17.2, 7.2$  Hz, 1H), 3.23 (dd,  $J = 17.2, 4.8$  Hz, 1H), 1.20-1.29 (m, 9H);  $^{13}\text{C NMR}$  ( $\text{CDCl}_3$ , 100 MHz)  $\delta$  171.4, 168.4, 167.8, 119.0, 113.3, 61.9 (2C), 61.6, 52.0, 39.8, 33.4, 13.9 (3C); **IR** (Neat): 2982, 2930, 2872, 1732, 1470, 1408, 1369, 1290, 1176, 1123, 1075, 922, 909, 859, 743; **HRMS** (ESI): calcd for  $[\text{M}+\text{H}]^+$  ( $\text{C}_{17}\text{H}_{24}\text{NO}_7$ ) $^+$  requires 354.1547; found 354.1547; HPLC analysis Daicel Chiralpak PC-II, flow rate = 1.0 mL/min,  $\lambda = 254$  nm, hexane/isopropanol = 70:30; Condition A : (*R*)-**4x**, 95% yield (33.7 mg), 73% ee,  $[\alpha]_{\text{D}}^{25} = -3.9$  ( $c = 1.0$ ,  $\text{CHCl}_3$ ), retention time 13.4 min (major) and 18.1 min (minor); Condition B: (*S*)-**4x**, 99% yield (34.8 mg), 92% ee,  $[\alpha]_{\text{D}}^{25} = +5.8$  ( $c = 1.0$ ,  $\text{CHCl}_3$ ); retention time 13.3 min (minor) and 17.8 min (major).

#### Diethyl 2-(3-(1H-indol-1-yl)-3-oxo-1-phenylpropyl)malonate (**4y**)

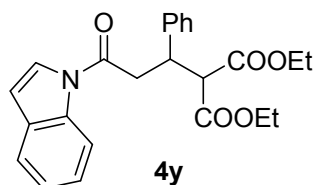

White solid, m.p. 82-83 °C;  $^1\text{H NMR}$  ( $\text{CDCl}_3$ , 400 MHz)  $\delta$  8.35 (d,  $J = 8.0$  Hz, 1H), 7.52-7.58 (m, 2H), 7.18-7.30 (m, 7H), 6.62 (d,  $J = 3.6$  Hz, 1H), 4.14-4.27 (m, 3H), 3.97 (q,  $J = 7.2$  Hz, 2H), 3.87 (d,  $J = 9.6$  Hz, 1H), 3.56 (dd,  $J = 15.6, 4.4$  Hz, 1H), 3.34 (dd,  $J = 15.6, 9.6$  Hz, 1H), 1.23 (t,  $J = 6.8$  Hz, 3H), 1.01 (t,  $J = 7.2$  Hz, 3H);  $^{13}\text{C NMR}$  ( $\text{CDCl}_3$ , 100 MHz)  $\delta$  169.0, 168.3, 167.6, 139.6, 135.5, 130.3, 128.6, 128.1, 127.5, 125.0, 124.7, 123.6, 120.7, 116.6, 109.3, 61.9, 61.5, 57.2, 41.3, 40.0, 14.0, 13.8; **IR** (Neat): 2981, 2935, 1730, 1537, 1472, 1452, 1389, 1343, 1308, 1252, 1227, 1207, 1175, 1152, 1109, 1084, 1029, 751, 700; **HRMS** (ESI): calcd for  $[\text{M}+\text{H}]^+$  ( $\text{C}_{24}\text{H}_{26}\text{NO}_5$ ) $^+$  requires

408.1805; found 408.1806; HPLC analysis Daicel Chiralpak AD-H, flow rate = 1.0 mL/min,  $\lambda$  = 254 nm, hexane/isopropanol = 70:30; Condition A : (*R*)-**4y**, 97% yield (39.4 mg), 95% ee,  $[\alpha]_{\text{D}}^{25}$  = +14.8 ( $c$  = 1.0, CHCl<sub>3</sub>), retention time 15.1 min (major) and 31.3 min (minor); Condition B: (*S*)-**4y**, 89% yield (36.1 mg), 99% ee,  $[\alpha]_{\text{D}}^{25}$  = -15.5 ( $c$  = 1.0, CHCl<sub>3</sub>); retention time 15.2 min (minor) and 31.4 min (major).

**Diethyl 2-(4-(1H-indol-1-yl)-4-oxobutan-2-yl)malonate (4z)**

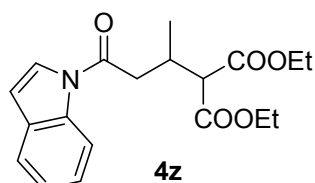

Colorless oil; **<sup>1</sup>H NMR** (CDCl<sub>3</sub>, 400 MHz)  $\delta$  8.40 (d,  $J$  = 8.4 Hz, 1H), 7.48-7.55 (m, 2H), 7.18-7.29 (m, 2H), 6.57 (d,  $J$  = 3.6 Hz, 1H), 4.12-4.17 (m, 4H), 3.45 (d,  $J$  = 6.4 Hz, 1H), 3.22 (dd,  $J$  = 15.6, 4.0 Hz, 1H), 2.86-2.94 (m, 1H), 2.75 (dd,  $J$  = 15.6, 8.8 Hz, 1H), 1.17-1.22 (m, 6H), 1.11 (d,  $J$  = 6.8 Hz, 3H); **<sup>13</sup>C NMR** (CDCl<sub>3</sub>, 100 MHz)  $\delta$  170.0, 168.6, 168.5, 135.6, 130.4, 125.1, 124.9, 123.7, 120.8, 116.6, 109.2, 61.5, 56.3, 40.1, 30.0, 17.7, 14.1; **IR** (Neat): 2979, 2930, 2855, 1731, 1605, 1586, 1537, 1452, 1369, 1309, 1261, 1207, 1155, 1094, 1031, 802, 752; **HRMS** (ESI): calcd for  $[\text{M}+\text{H}]^+$  (C<sub>19</sub>H<sub>24</sub>NO<sub>5</sub>)<sup>+</sup> requires 346.1649; found 346.1649; HPLC analysis Daicel Chiralpak IG, flow rate = 0.7 mL/min,  $\lambda$  = 214 nm, hexane/isopropanol = 90:10; Condition A : (*R*)-**4z**, 95% yield (32.7 mg), 74% ee,  $[\alpha]_{\text{D}}^{25}$  = -18.6 ( $c$  = 1.0, CHCl<sub>3</sub>), retention time 24.0 min (minor) and 26.7 min (major); Condition B: (*S*)-**4z**, 90% yield (31.1 mg), 95% ee,  $[\alpha]_{\text{D}}^{25}$  = +28.7 ( $c$  = 1.0, CHCl<sub>3</sub>); retention time 23.7 min (major) and 27.0 min (minor).

**Diethyl 2-(3-(9H-carbazol-9-yl)-3-oxo-1-phenylpropyl)malonate (4a')**

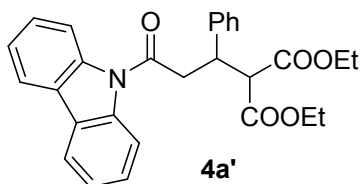

White solid, m.p. 91-92 °C; **<sup>1</sup>H NMR** (CDCl<sub>3</sub>, 400 MHz)  $\delta$  8.16 (d,  $J$  = 8.4 Hz, 2H), 7.95 (d,  $J$  = 7.2 Hz, 2H), 7.44 (t,  $J$  = 7.6 Hz, 2H), 7.33-7.36 (m, 4H), 7.23-7.27 (m, 2H), 7.16-7.19 (m, 1H), 4.33-4.40 (m, 1H), 4.13-4.25 (m, 2H), 4.01 (q,  $J$  = 7.2 Hz, 2H), 3.95 (d,  $J$  = 8.8 Hz, 1H), 3.69-3.81 (m, 2H), 1.21 (t,  $J$  = 6.8 Hz, 3H), 1.06 (t,  $J$  = 7.2 Hz, 3H); **<sup>13</sup>C NMR** (CDCl<sub>3</sub>, 100 MHz)  $\delta$  170.8, 168.4, 167.8, 140.5, 138.4, 128.5, 128.2, 127.3, 127.3, 126.3, 123.6, 119.8, 116.4, 61.7, 61.5, 57.3, 42.7, 40.7, 14.0, 13.8; **IR** (Neat): 3062, 3031, 1981, 2936, 1731, 1697, 1599, 1491, 1478, 1426, 1446, 1370, 1324, 1278, 1239, 1209, 1157, 1103, 1032, 980, 861, 755, 723, 700; **HRMS** (ESI): calcd for  $[\text{M}+\text{H}]^+$  (C<sub>28</sub>H<sub>28</sub>NO<sub>5</sub>)<sup>+</sup> requires 458.1962; found 458.1962; HPLC analysis Daicel Chiralpak AD-H, flow rate = 1.0 mL/min,  $\lambda$  = 254 nm, hexane/isopropanol = 70:30; Condition A : (*R*)- **4a'**, 95% yield (43.3 mg), 96% ee,  $[\alpha]_{\text{D}}^{25}$  = -30.8 ( $c$  = 1.0, CHCl<sub>3</sub>), retention time 11.9 min (major) and 28.2 min (minor); Condition B: (*S*)- **4a'**, 90% yield (41.1 mg), 98% ee,  $[\alpha]_{\text{D}}^{25}$  = -30.9

( $c = 1.0$ ,  $\text{CHCl}_3$ ); retention time 11.7 min (minor) and 27.7 min (major).

#### Diethyl 2-(4-(9H-carbazol-9-yl)-4-oxobutan-2-yl)malonate (**4b'**)

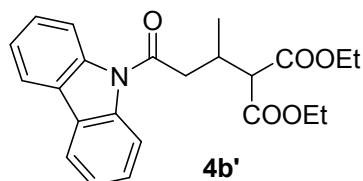

Colorless oil; **<sup>1</sup>H NMR** ( $\text{CDCl}_3$ , 400 MHz)  $\delta$  8.24 (d,  $J = 8.4$  Hz, 2H), 7.98 (d,  $J = 7.6$  Hz, 2H), 7.47 (t,  $J = 8.0$  Hz, 2H), 7.37 (t,  $J = 7.6$  Hz, 2H), 4.17-4.26 (m, 4H), 3.67 (d,  $J = 5.6$  Hz, 1H), 3.43-3.50 (m, 1H), 3.15-3.23 (m, 2H), 1.22-1.30 (m, 9H); **<sup>13</sup>C NMR** ( $\text{CDCl}_3$ , 100 MHz)  $\delta$  171.7, 168.8, 168.6, 138.4, 127.4, 126.4, 123.6, 119.8, 116.5, 61.4 (2C), 61.4, 56.0, 43.0, 29.7, 18.1, 14.1 (2C); **IR** (Neat): 2980, 2937, 1730, 1696, 1478, 1490, 1445, 1425, 1372, 1326, 1281, 1239, 1208, 1159, 1096, 1061, 1034, 755, 723; **HRMS** (ESI): calcd for  $[\text{M}+\text{H}]^+$  ( $\text{C}_{23}\text{H}_{26}\text{NO}_5$ )<sup>+</sup> requires 396.1805; found 396.1806; HPLC analysis Daicel Chiralpak IC, flow rate = 1.0 mL/min,  $\lambda = 254$  nm, hexane/isopropanol = 80:20; Condition A : (*R*)-**4b'**, 94% yield (37.1 mg), 78% ee,  $[\alpha]_{\text{D}}^{25} = +2.5$  ( $c = 1.0$ ,  $\text{CHCl}_3$ ), retention time 14.4 min (major) and 17.6 min (minor); Condition B: (*S*)-**4b'**, 95% yield (37.4 mg), 96% ee,  $[\alpha]_{\text{D}}^{25} = -2.9$  ( $c = 1.0$ ,  $\text{CHCl}_3$ ); retention time 14.5 min (minor) and 17.7 min (major).

#### Diethyl 2-(3-oxo-1-phenyl-3-(1H-pyrazol-1-yl)propyl)malonate (**4c'**)

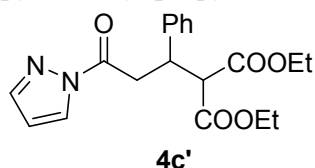

White solid, m.p. 98-99 °C; **<sup>1</sup>H NMR** ( $\text{CDCl}_3$ , 400 MHz)  $\delta$  8.12 (d,  $J = 2.4$  Hz, 1H), 7.66 (s, 1H), 7.30-7.32 (m, 2H), 7.25 (t,  $J = 7.6$  Hz, 2H), 7.16-7.20 (m, 1H), 6.37 (dd,  $J = 2.8, 1.6$  Hz, 1H), 4.15-4.26 (m, 3H), 3.93 (q,  $J = 7.2$  Hz, 2H), 3.74-3.84 (m, 2H), 3.59 (dd,  $J = 17.2, 4.4$  Hz, 1H), 1.25 (t,  $J = 7.2$  Hz, 3H), 0.98 (t,  $J = 7.2$  Hz, 3H); **<sup>13</sup>C NMR** ( $\text{CDCl}_3$ , 100 MHz)  $\delta$  169.6, 168.0, 167.5, 143.8, 139.9, 128.4, 128.3, 128.2, 127.3, 109.5, 61.7, 61.3, 57.4, 40.6, 38.3, 14.0, 13.7; **IR** (Neat): 3232, 2983, 2929, 1733, 1496, 1455, 1393, 1370, 1252, 1152, 1096, 1030, 860, 766, 701; **HRMS** (ESI): calcd for  $[\text{M}+\text{H}]^+$  ( $\text{C}_{19}\text{H}_{23}\text{N}_2\text{O}_5$ )<sup>+</sup> requires 359.1601; found 359.1600; HPLC analysis Daicel Chiralpak AD-H, flow rate = 1.0 mL/min,  $\lambda = 254$  nm, hexane/isopropanol = 70:30; Condition A : (*R*)-**4c'**, 49% yield (17.5 mg), 92% ee,  $[\alpha]_{\text{D}}^{25} = -46.0$  ( $c = 1.0$ ,  $\text{CHCl}_3$ ), retention time 10.9 min (major) and 14.6 min (minor); Condition B: (*S*)-**4c'**, 72% yield (25.7 mg), 83% ee,  $[\alpha]_{\text{D}}^{25} = +42.8$  ( $c = 1.0$ ,  $\text{CHCl}_3$ ); retention time 11.1 min (minor) and 14.8 min (major).

## Synthesis of compound (S)-5.

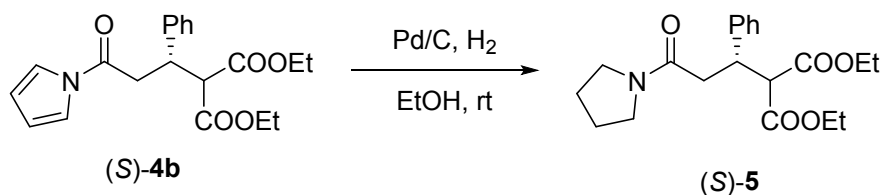

To solution of **(S)-4b** (0.15 mmol) in EtOH (4 mL) was added Pd/C (5 mg, 10%). Then reaction mixture was stirred under H<sub>2</sub> atmosphere (1 atm) at room temperature for 21 h. After completion of reaction, the Pd/C catalyst was removed by filtration. The filtrate was evaporated to remove the solvent and the crude product was purified by silica gel column chromatography (ethyl acetate/petroleum ether as eluent) to afford pure product **(S)-5**.

## Diethyl (S)-2-(3-oxo-1-phenyl-3-(pyrrolidin-1-yl)propyl)malonate ((S)-5)

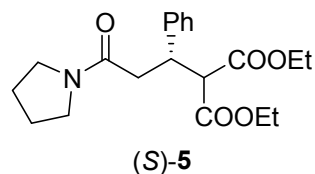

99% yield; white solid, m.p. 64-65 °C; <sup>1</sup>H NMR (CDCl<sub>3</sub>, 400 MHz) δ 7.23-7.30 (m, 4H), 7.16-7.20 (m, 1H), 4.20 (q, *J* = 7.2 Hz, 2H), 3.99-4.05 (m, 1H), 3.91-3.96 (m, 3H), 3.16-3.38 (m, 4H), 2.69-2.80 (m, 2H), 1.66-1.78 (m, 4H), 1.26 (t, *J* = 7.2 Hz, 3H), 0.99 (t, *J* = 7.2 Hz, 3H); <sup>13</sup>C NMR (CDCl<sub>3</sub>, 100 MHz) δ 168.9, 168.3, 167.9, 140.7, 128.2, 128.2, 127.0, 61.5, 61.1, 56.8, 46.5, 45.5, 41.4, 38.7, 25.9, 24.2, 14.0, 13.7; IR (Neat): 2976, 2873, 1732, 1636, 1436, 1394, 1368, 1314, 1258, 1152, 1096, 1036, 764, 750, 702; HRMS (ESI): calcd for [M+H]<sup>+</sup>(C<sub>20</sub>H<sub>28</sub>NO<sub>5</sub>)<sup>+</sup> requires 362.1962; found 362.1963; 99% ee determined by HPLC (AD-H, hexane/*i*-PrOH 70/30, flow rate 1.0 mL/min; *t*<sub>major</sub> = 9.6 min, *t*<sub>minor</sub> = 8.1 min, λ = 220 nm); [α]<sub>D</sub><sup>25</sup> = +18.2 (*c* = 1.0, CHCl<sub>3</sub>).

## Synthesis of compound (S)-6.

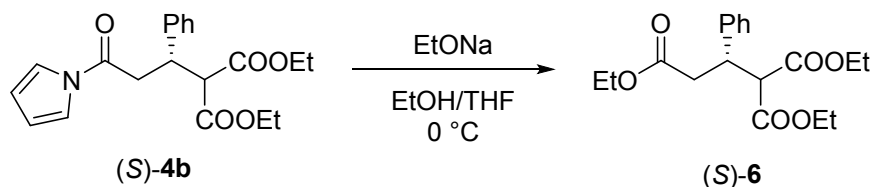

To solution of **(S)-4b** (0.15 mmol) in mixed solvent of EtOH (2 mL) and THF (0.5 mmol) at 0 °C was added EtONa (0.23 mmol). The reaction mixture was stirred at same temperature for 2h. Then the reaction was quenched with saturated NH<sub>4</sub>Cl aqueous solution (10 mL). And the mixture was

extracted with AcOEt (15 mL×3). The combined organic layers were washed with brine and dried with Na<sub>2</sub>SO<sub>4</sub>. After evaporating solvent in vacuo, the residue was purified by flash column chromatography on silica gel (ethyl acetate/petroleum ether as eluent) to afford product (*S*)-6.

#### Triethyl (*S*)-2-phenylpropane-1,1,3-tricarboxylate ((*S*)-6)

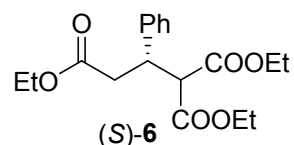

97% yield; colorless oil; <sup>1</sup>H NMR (CDCl<sub>3</sub>, 400 MHz) δ 7.18-7.29 (m, 5H), 4.22 (q, *J* = 7.2 Hz, 2H), 3.89-4.02 (m, 5H), 3.73 (d, *J* = 10.4 Hz, 1H), 2.85 (dd, *J* = 14.8, 4.4 Hz, 1H), 2.72 (dd, *J* = 15.6, 10.0 Hz, 1H), 1.27 (t, *J* = 7.2 Hz, 3H), 1.08 (t, *J* = 7.2 Hz, 3H), 0.99 (t, *J* = 7.2 Hz, 3H); <sup>13</sup>C NMR (CDCl<sub>3</sub>, 100 MHz) δ 171.0, 168.0, 167.5, 139.8, 128.3, 128.2, 127.2, 61.6, 61.3, 60.4, 57.3, 41.5, 38.7, 14.0, 14.0, 13.7; IR (Neat): 2982, 2937, 1725, 1454, 1369, 1254, 1150, 1096, 1031, 765, 701; HRMS (ESI): calcd for [M+H]<sup>+</sup> (C<sub>20</sub>H<sub>28</sub>NO<sub>5</sub>)<sup>+</sup> requires 337.1646; found 337.1645; 99% ee determined by HPLC (AD-H, hexane/*i*-PrOH 80/20, flow rate 1.0 mL/min; *t*<sub>major</sub> = 11.1 min, *t*<sub>minor</sub> = 7.1 min, λ = 220 nm); [α]<sub>D</sub><sup>25</sup> = +15.7 (*c* = 1.0, CHCl<sub>3</sub>).

#### Synthesis of compound (*R*)-7 and (*R*)-8<sup>[10]</sup>.

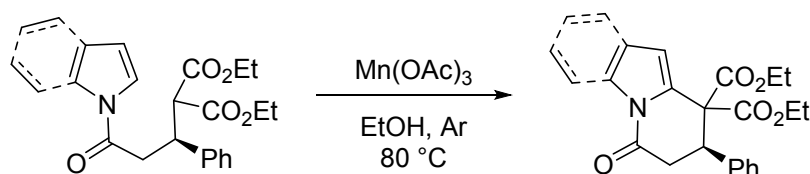

(*R*)-4d' (or (*R*)-4y, 0.15 mmol) and Mn(AcO)<sub>3</sub>·2H<sub>2</sub>O (0.45 mmol) were added into EtOH (2.0 mL) under Ar. Then the reaction mixture was stirred at 80 °C until the TLC analysis showed complete consumption of starting material. The solvent was evaporated in vacuo. The residue was dissolved in water (10 mL), and the mixture was extracted with EtOAc (15 mL×3). The organic layers were combined and washed with brine, then dried with Na<sub>2</sub>SO<sub>4</sub>. The solvent was removed in vacuo. The residue was purified by flash column chromatography on silica gel (ethyl acetate/petroleum ether as eluent) to yield product (*R*)-7 (or (*R*)-8).

#### Diethyl (*R*)-5-oxo-7-phenyl-6,7-dihydroindolizine-8,8(5*H*)-dicarboxylate((*R*)-7)

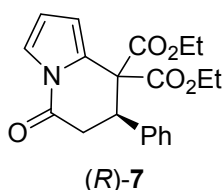

81% yield, colorless oil; **<sup>1</sup>H NMR** (CDCl<sub>3</sub>, 400 MHz) 7.52 (dd, *J* = 3.2, 1.6 Hz, 1H), 7.15-7.20 (m, 3H), 6.88-6.91 (m, 2H), 6.65 (dd, *J* = 3.2, 1.6 Hz, 1H), 6.39 (t, *J* = 3.2 Hz, 1H), 4.11-4.28 (m, 3H), 3.87-4.02 (m, 2H), 3.65 (dd, *J* = 17.6, 6.0 Hz, 1H), 2.95 (dd, *J* = 17.6, 3.6 Hz, 1H), 1.22 (t, *J* = 7.2 Hz, 3H), 0.98 (t, *J* = 7.2 Hz, 3H); **<sup>13</sup>C NMR** (CDCl<sub>3</sub>, 100 MHz) δ 168.4, 167.2, 166.2, 139.1, 128.7, 127.9, 127.8, 126.2, 117.5, 116.5, 113.5, 62.4, 61.8, 57.6, 44.9, 37.7, 13.8, 13.6; **IR** (Neat): 2983, 1731, 1406, 1367, 1313, 1236, 1198, 1156, 1042, 700; **HRMS** (ESI): calcd for [M+H]<sup>+</sup> (C<sub>20</sub>H<sub>22</sub>NO<sub>5</sub>)<sup>+</sup> requires 356.1492; found 356.1492; >99% ee determined by HPLC (AD-H, hexane/*i*-PrOH 95/5, flow rate 1.0 mL/min; *t*<sub>major</sub> = 8.4 min, *t*<sub>minor</sub> = 11.0 min, λ = 254 nm); [α]<sub>D</sub><sup>25</sup> = +52.7 (*c* = 1.0, CHCl<sub>3</sub>).

### Diethyl (*R*)-6-oxo-8-phenyl-7,8-dihydropyrido[1,2-*a*]indole-9,9(6*H*)-dicarboxylate ((*R*)-8)

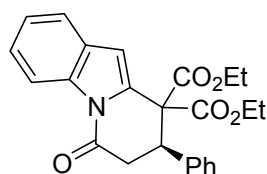

(*R*)-8

78% yield, colorless oil; **<sup>1</sup>H NMR** (CDCl<sub>3</sub>, 400 MHz) δ 8.55 (d, *J* = 8.0 Hz, 1H), 7.61 (d, *J* = 7.6 Hz, 1H), 7.37-7.41 (m, 1H), 7.31-7.35 (m, 1H), 7.14-7.22 (m, 3H), 7.05 (s, 1H), 6.94-6.98 (m, 2H), 4.24-4.32 (m, 2H), 4.11-4.19 (m, 1H), 3.93-4.06 (m, 2H), 3.74 (dd, *J* = 17.6, 6.0 Hz, 1H), 3.03 (dd, *J* = 17.6, 4.0 Hz, 1H), 1.24 (t, *J* = 7.2 Hz, 3H), 1.02 (t, *J* = 7.2 Hz, 3H); **<sup>13</sup>C NMR** (CDCl<sub>3</sub>, 100 MHz) δ 168.8, 168.0, 167.6, 139.7, 135.6, 132.1, 130.2, 129.4, 128.6, 128.5, 126.2, 125.0, 121.6, 117.5, 113.4, 63.4, 62.7, 58.9, 45.2, 39.1, 14.5, 14.3; **IR** (Neat): 2937, 1737, 1712, 1453, 1371, 1349, 1321, 1236, 1204, 1160, 1096, 1070, 1012, 861, 753, 700; **HRMS** (ESI): calcd for [M+H]<sup>+</sup> (C<sub>24</sub>H<sub>24</sub>NO<sub>5</sub>)<sup>+</sup> requires 406.1649; found 406.1649; 98% ee determined by HPLC (AD-H, hexane/*i*-PrOH 85/15, flow rate 1.0 mL/min; *t*<sub>major</sub> = 24.5 min, *t*<sub>minor</sub> = 13.7 min, λ = 254 nm); [α]<sub>D</sub><sup>25</sup> = +22.1 (*c* = 1.0, CHCl<sub>3</sub>).

## References

1. D. D. Cao, Z. Chai, J. X. Zhang, Z. Q. Ye, H. Xiao, H. Y. Wang, and G. Zhao, *Chem. Commun.*, 2013, **49**, 5972.
2. D. D. Cao, J. X. Zhang, H. Y. Wang, and G. Zhao, *Chem. Eur. J.* 2015, **21**, 9998.
3. Q. Jiang, T. Guo, R. Gao, Q. Wang, J. Lou, and Z. Yu, *J. Org. Chem.* 2018, **83**, 7981.
4. M. B. Shaghafi,; B. L. Kohn, E. R. Jarvo, *Org. Lett.* 2008, **10**, 4743.
5. D. Du, and W.-L. Duan, *Chem. Commun.* 2011, **47**, 11101.
6. B. M. Trost, and A. Maruniak, *Angew. Chem. Int. Ed.* 2013, **52**, 6262.



7. B. Vakulya, S. Varga, and T. Soós, *J. Org. Chem.* 2008, **73**, 3475.
8. V. M. Mićović, and M. L. Mihailović, *J. Org. Chem.* 1953, **18**, 1190.
9. X. Ding, C. Tian, Y. Hu, L. Gong, and E. Meggers, *Eur. J. Org. Chem.* 2016, 887.
10. J. Magolan, and M. A. Kerr, *Org. Lett.* 2006, **20**, 4561.

# Copies of NMR spectra and HPLC traces

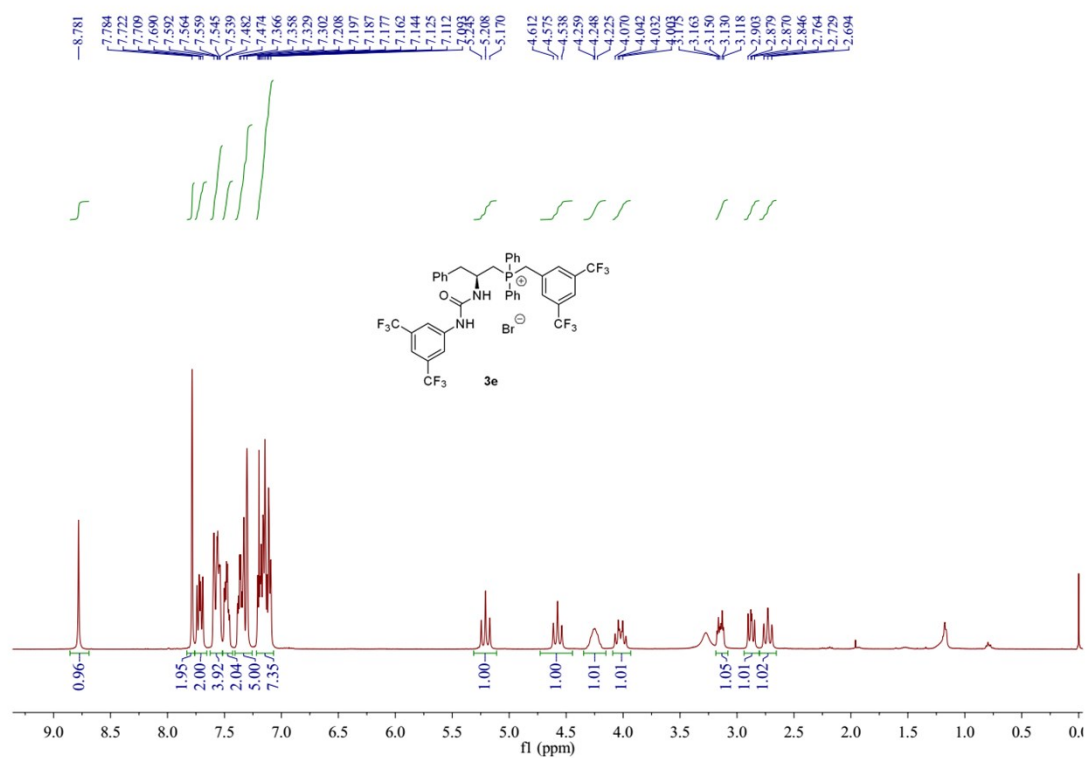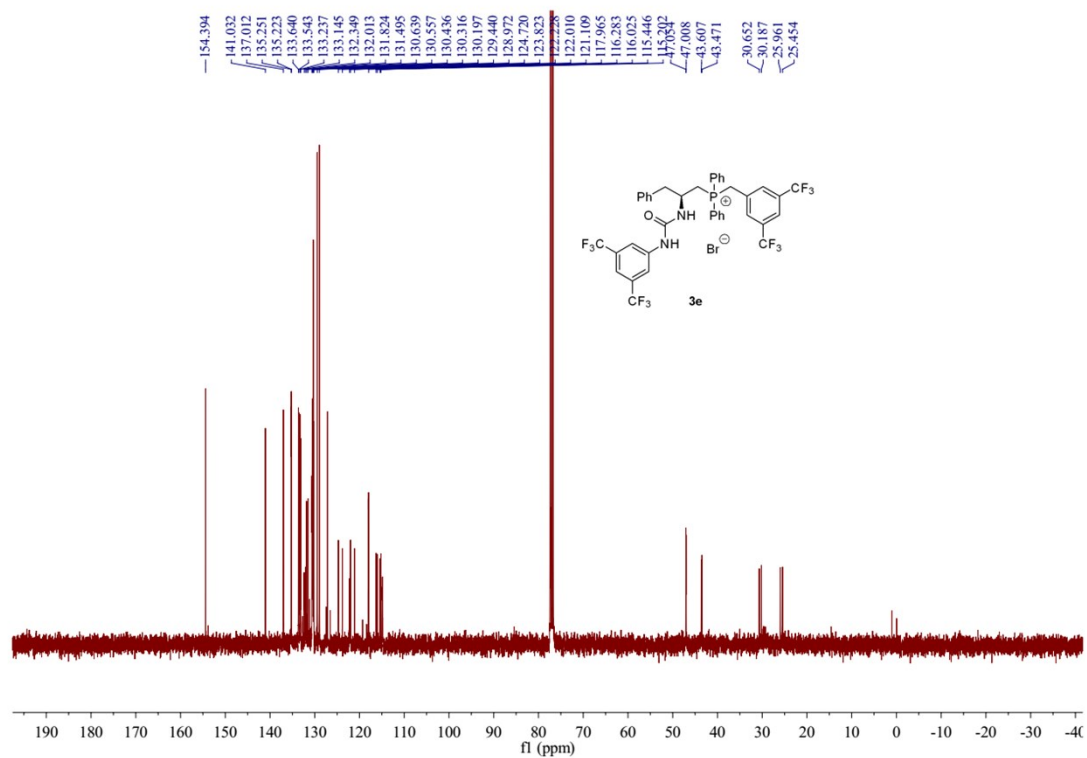

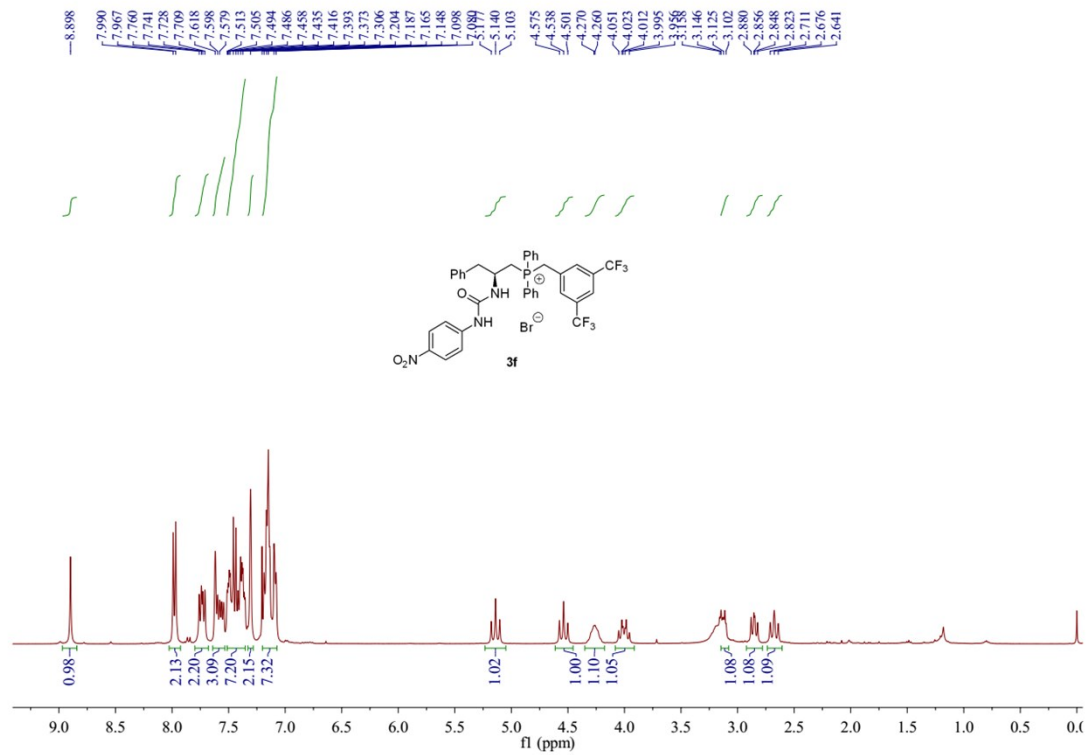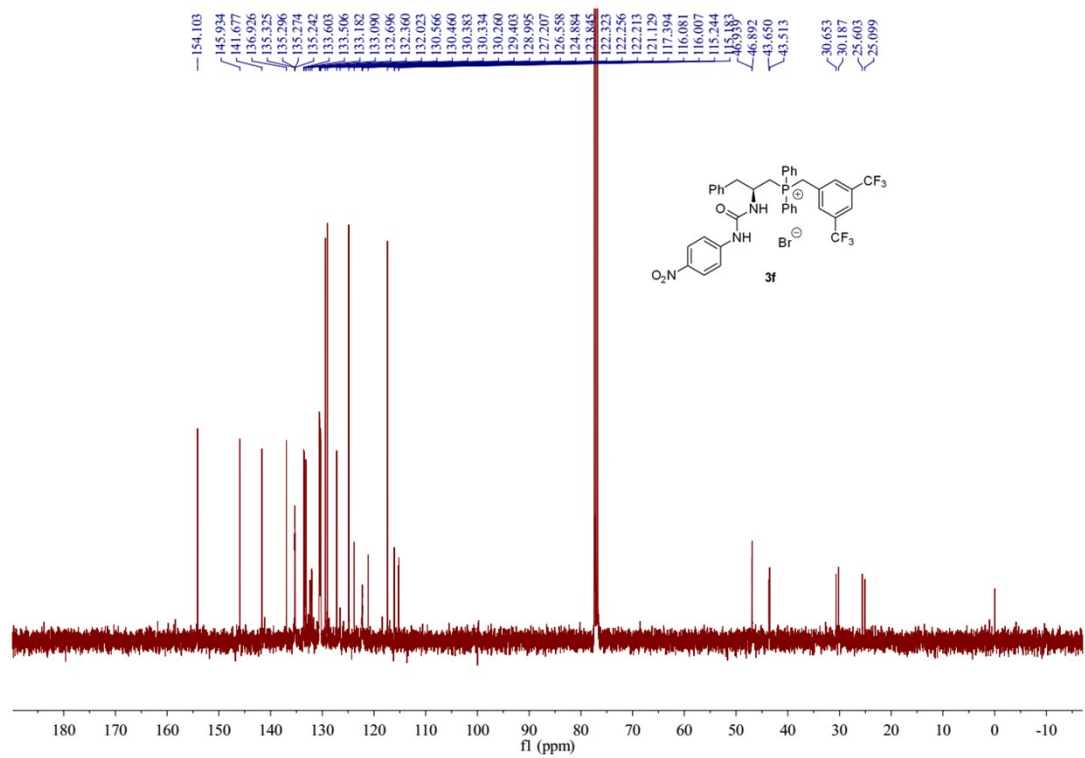

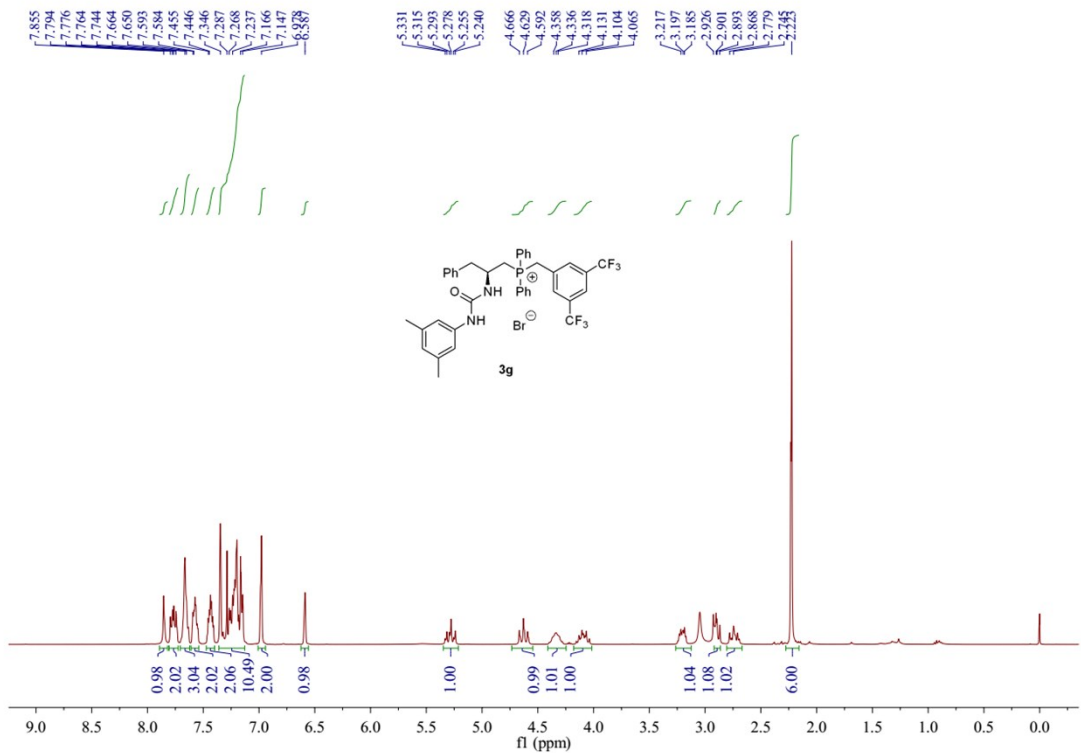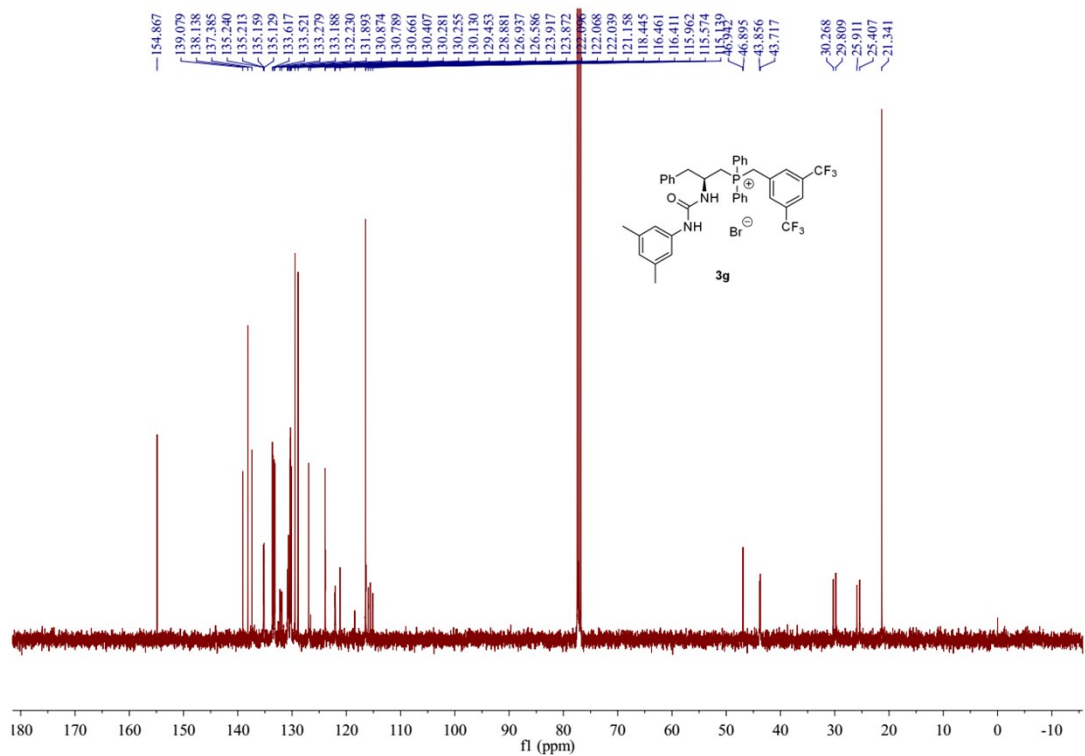

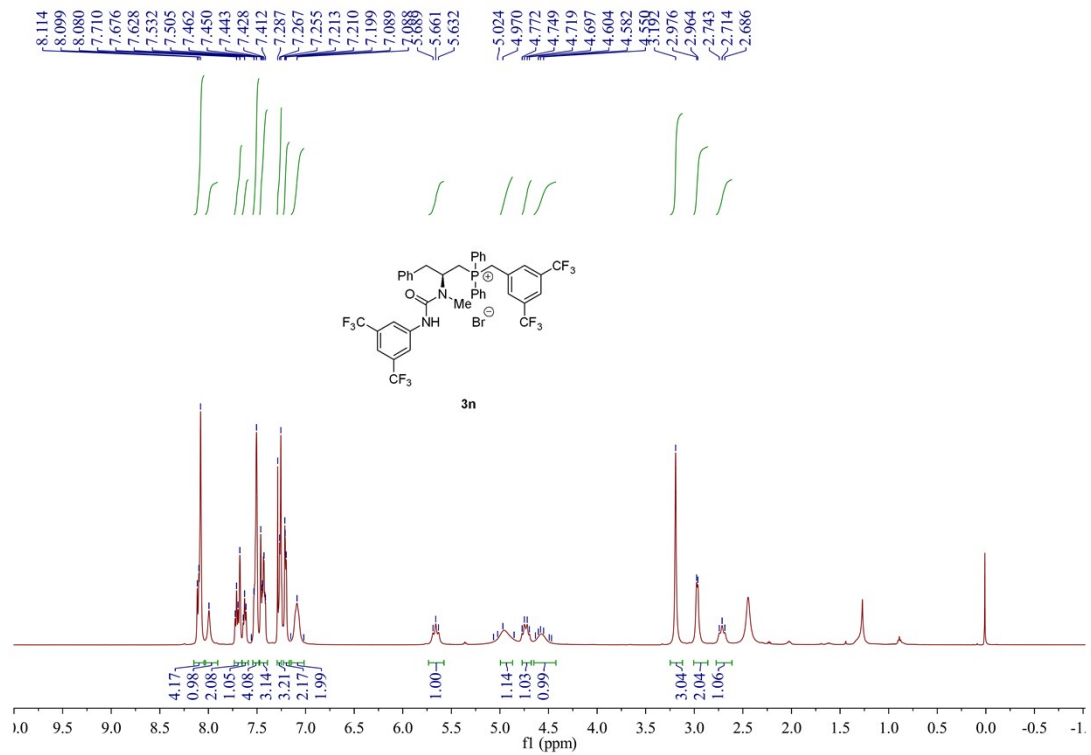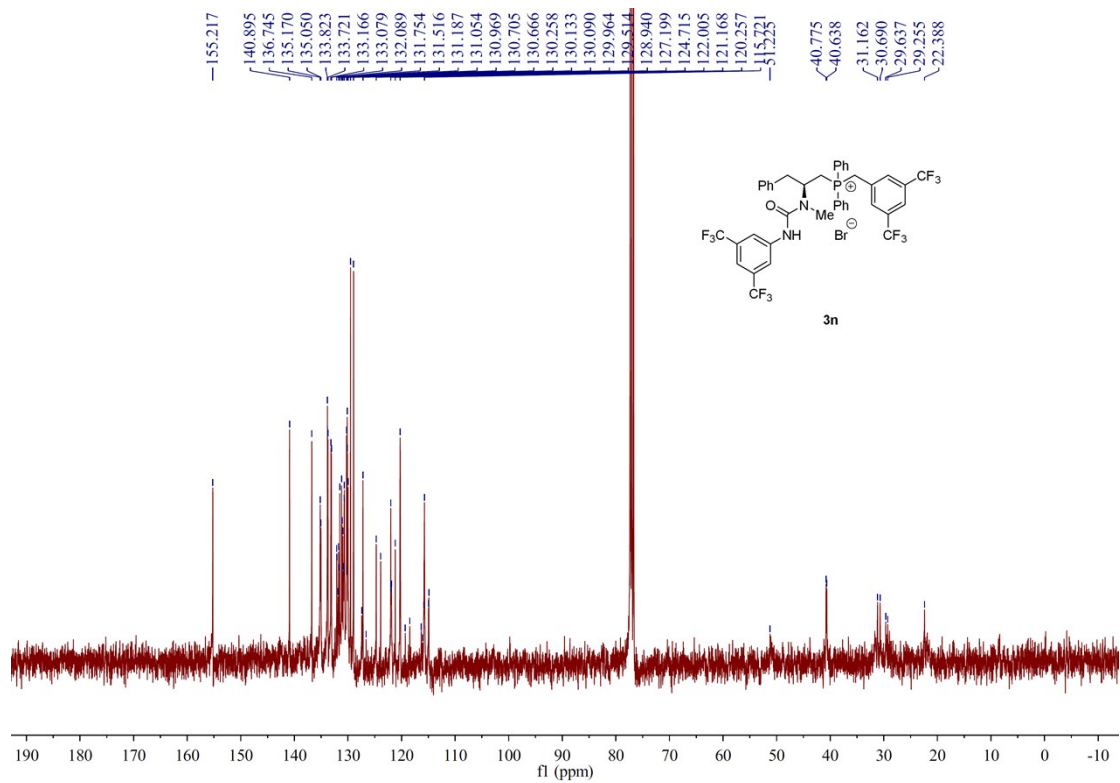

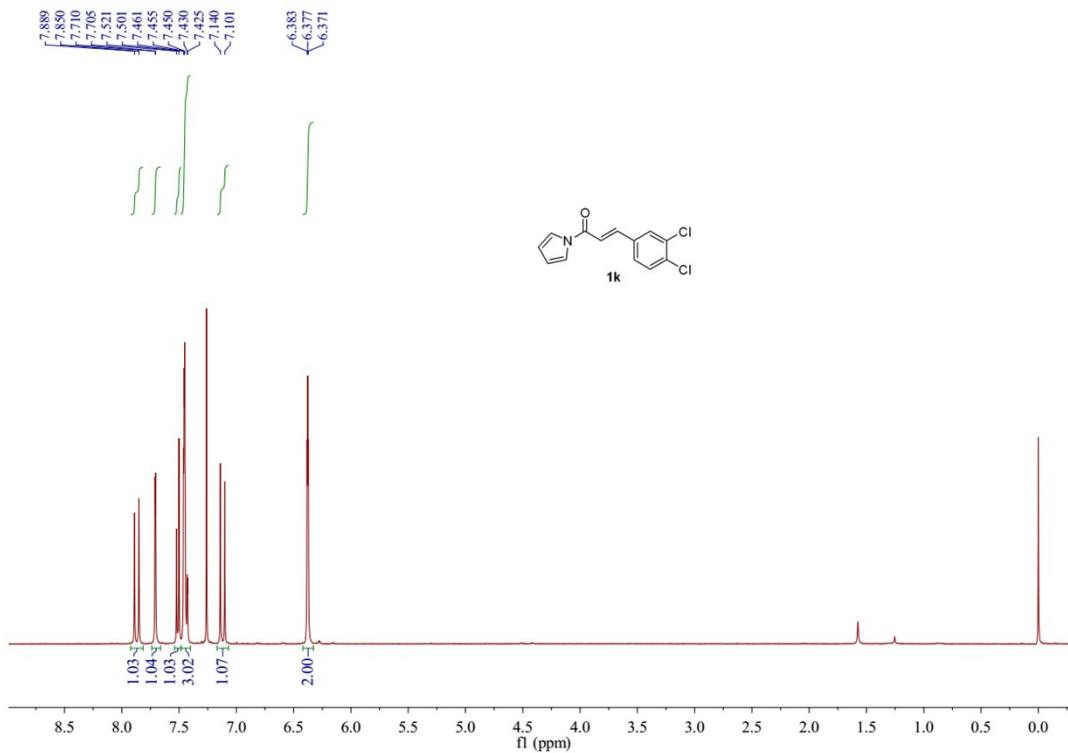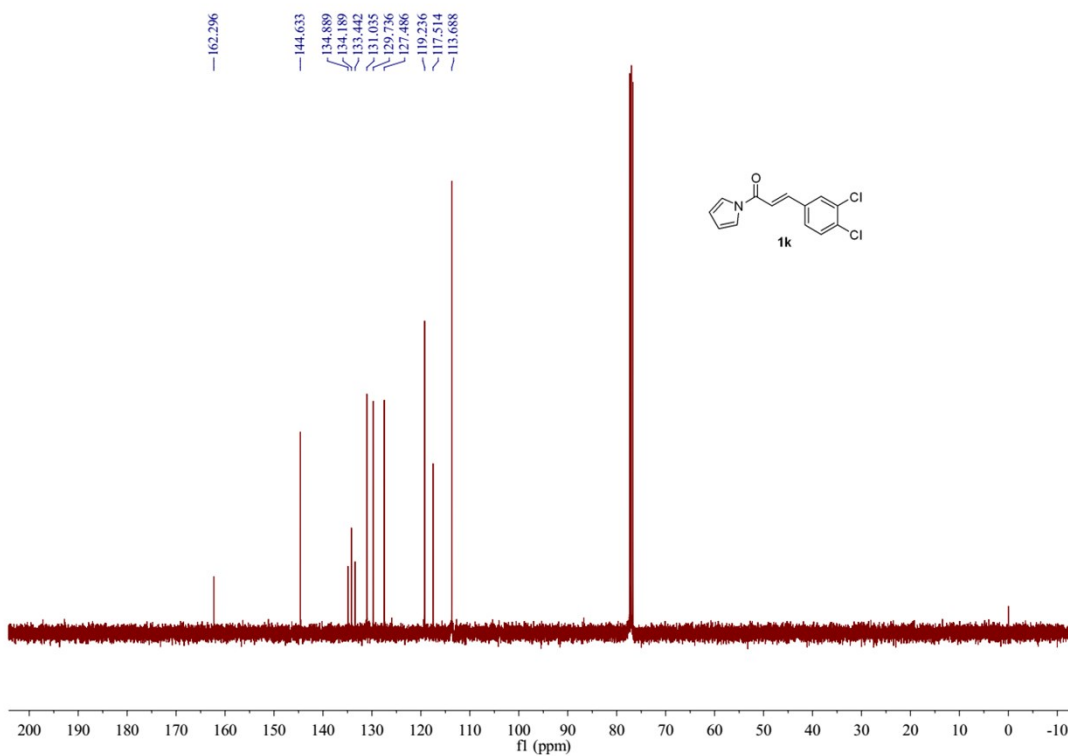

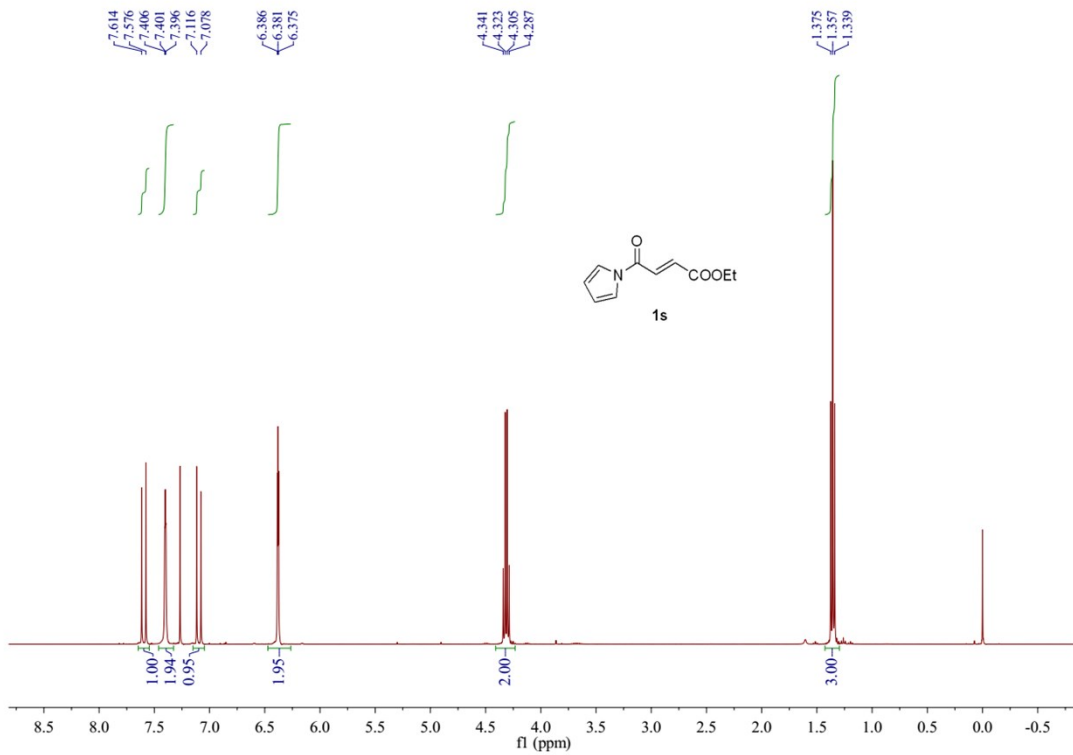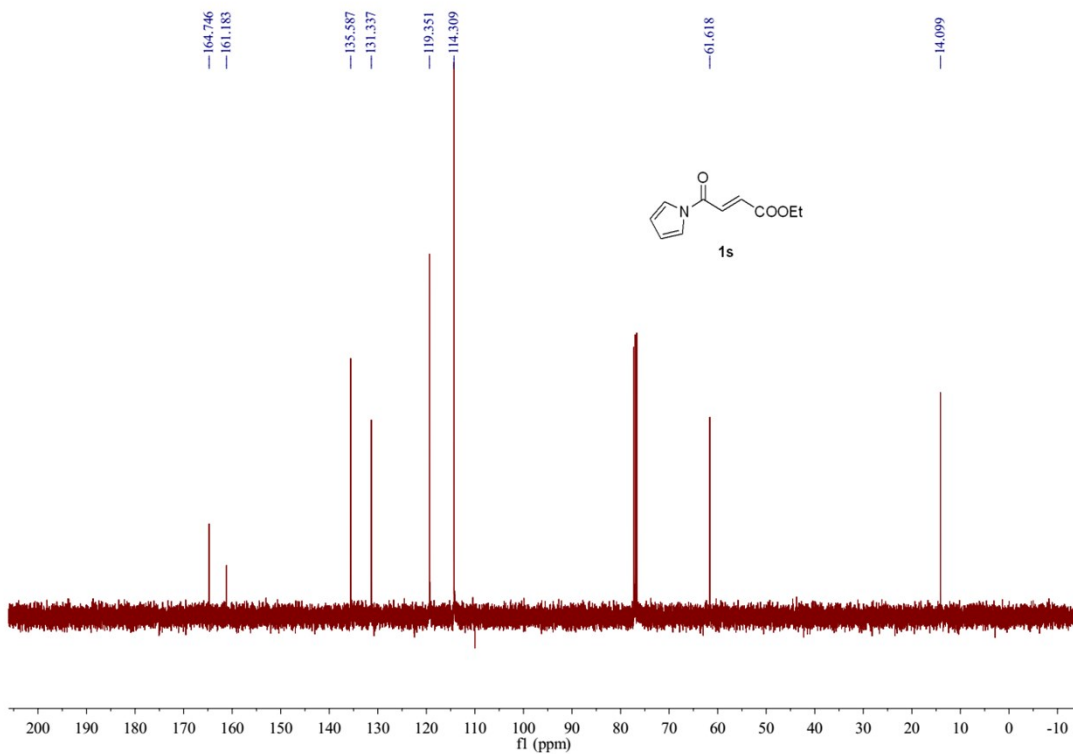

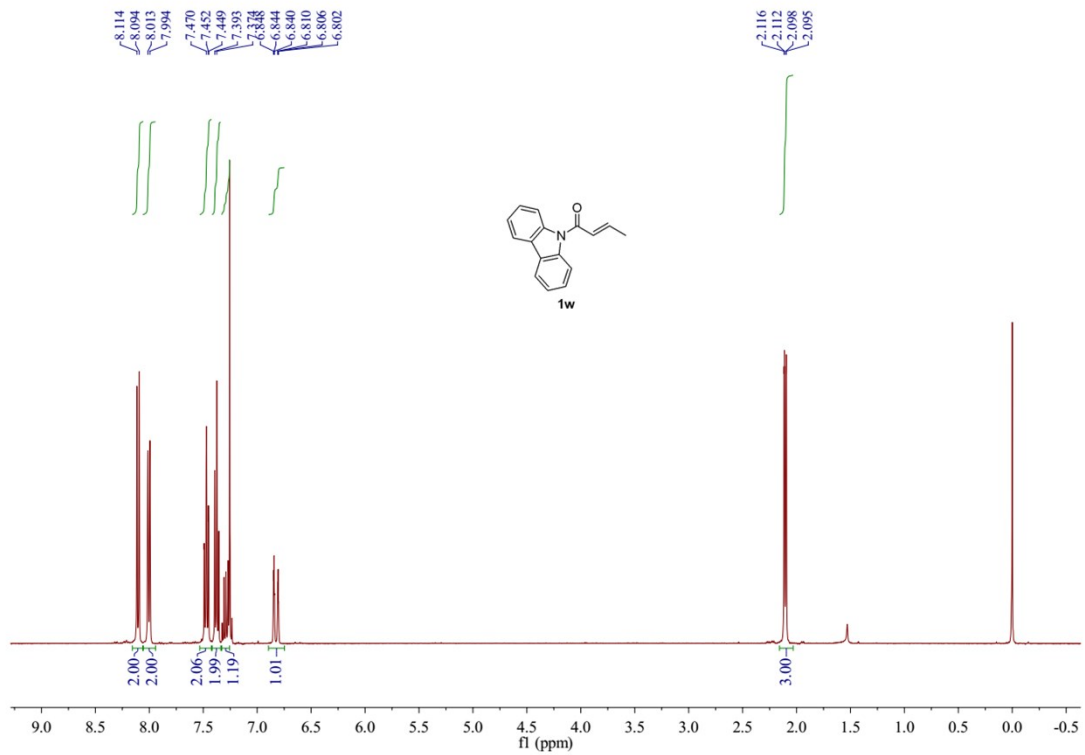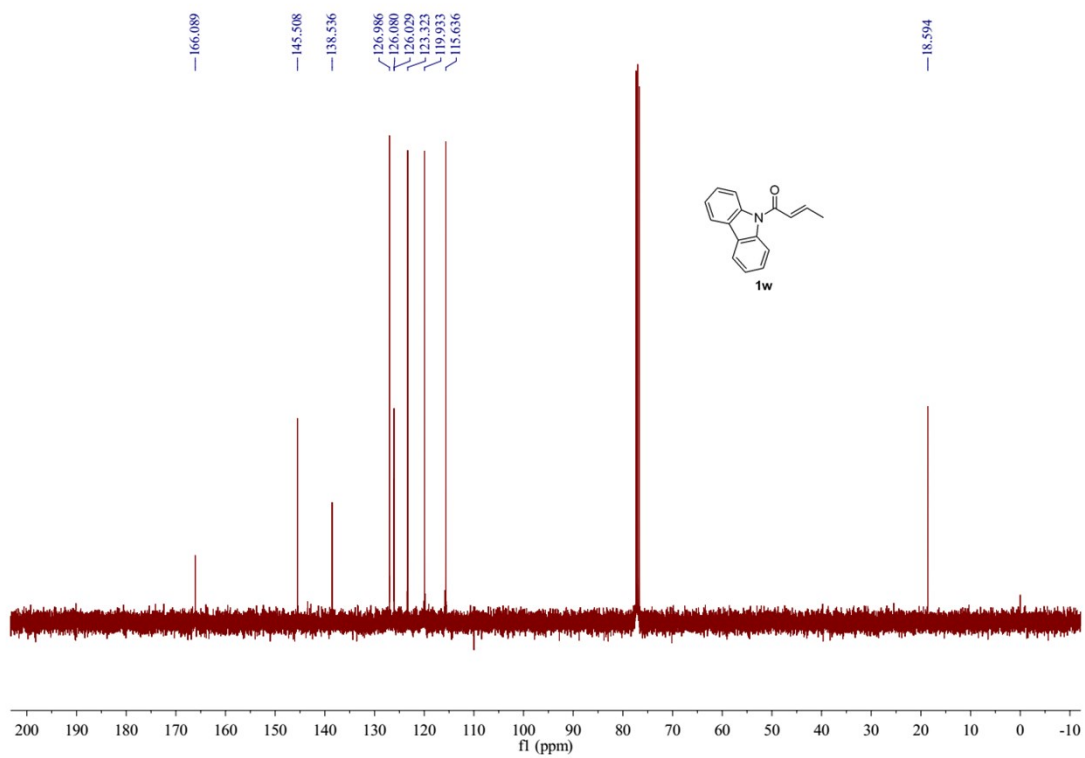



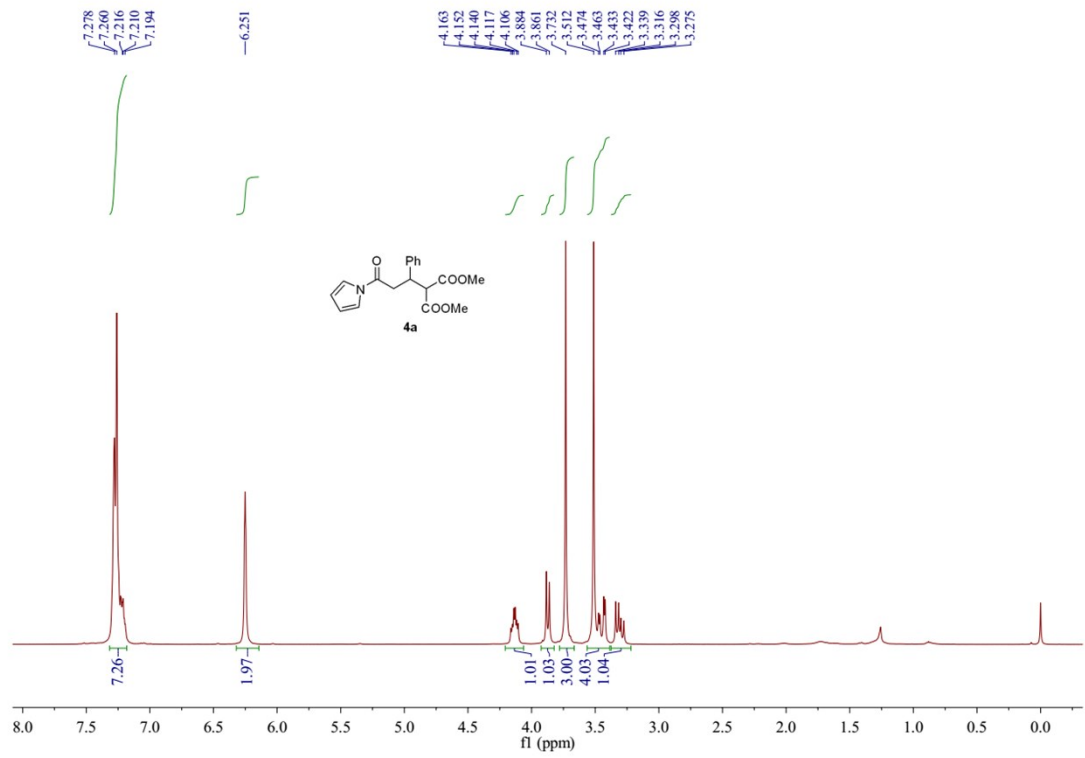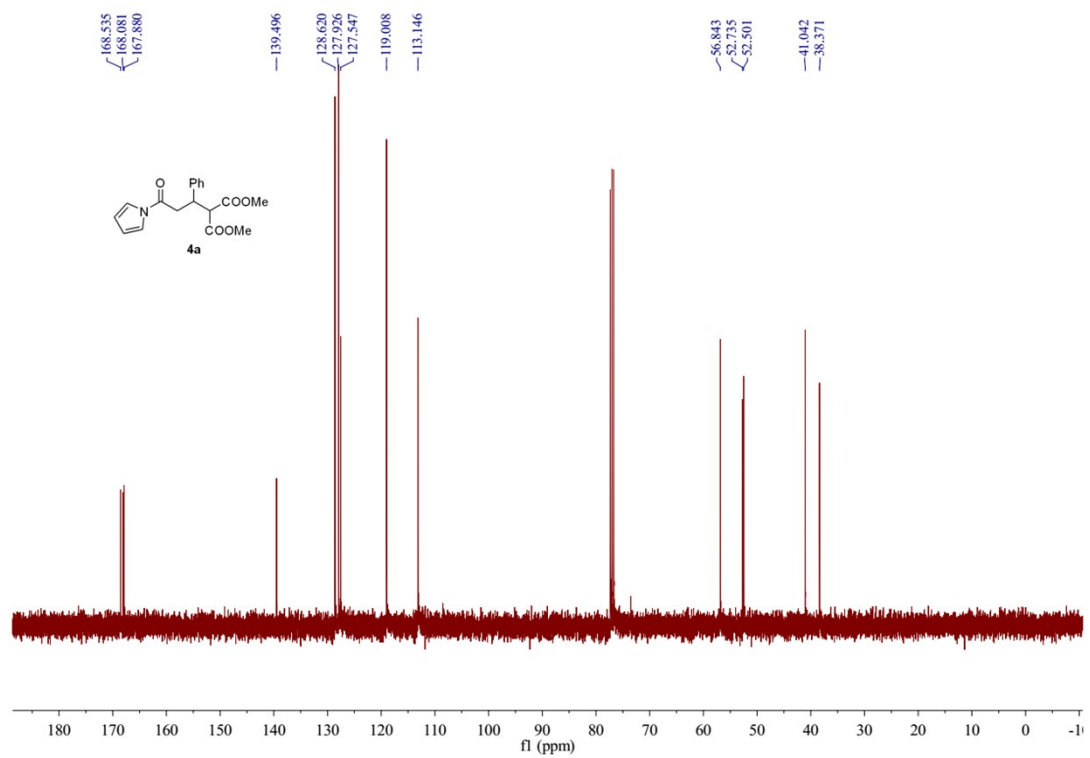

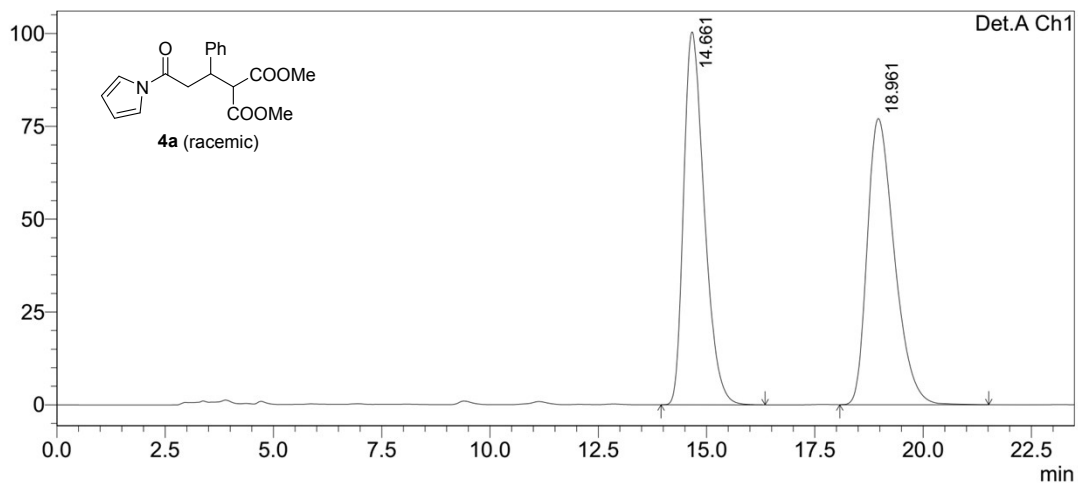

et.A Ch1/254nm

PeakTable

Detector A Ch1 254nm

| Peak# | Ret. Time | Area    | Height | Area %  | Height % |
|-------|-----------|---------|--------|---------|----------|
| 1     | 14.661    | 3334705 | 100416 | 49.712  | 56.577   |
| 2     | 18.961    | 3373399 | 77068  | 50.288  | 43.423   |
| Total |           | 6708104 | 177484 | 100.000 | 100.000  |

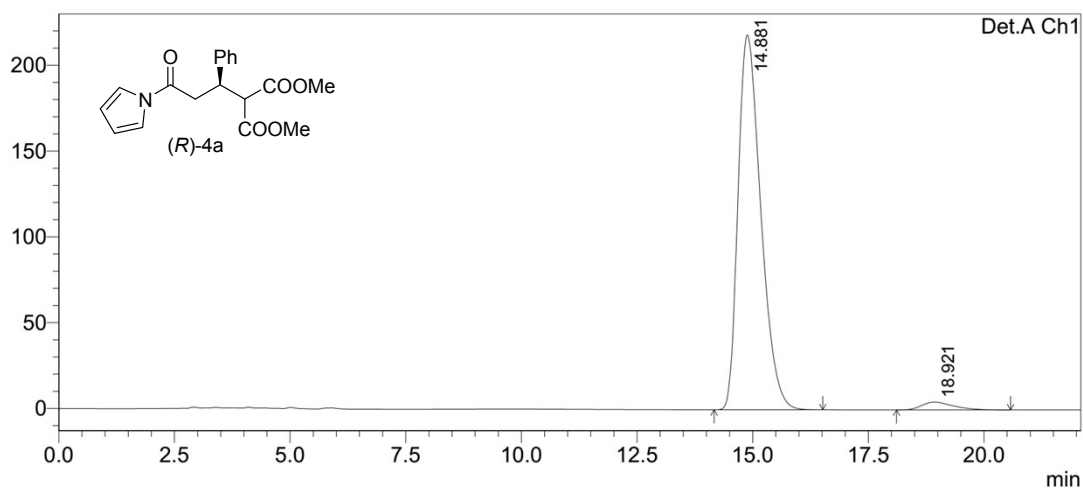

et.A Ch1/254nm

PeakTable

Detector A Ch1 254nm

| Peak# | Ret. Time | Area    | Height | Area %  | Height % |
|-------|-----------|---------|--------|---------|----------|
| 1     | 14.881    | 7467297 | 218437 | 97.198  | 97.962   |
| 2     | 18.921    | 215286  | 4544   | 2.802   | 2.038    |
| Total |           | 7682583 | 222981 | 100.000 | 100.000  |

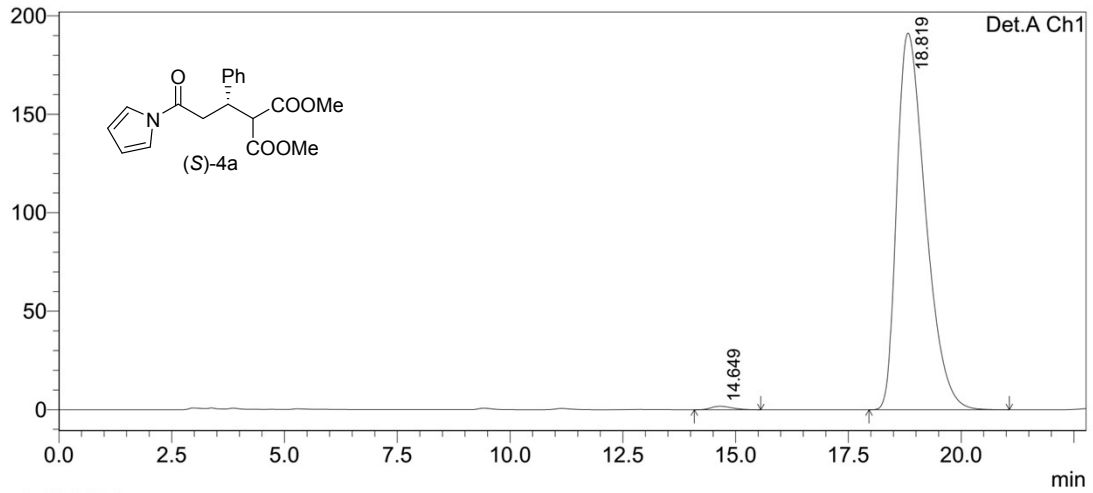

st.A Ch1/254nm

PeakTable

Detector A Ch1 254nm

| Peak# | Ret. Time | Area    | Height | Area %  | Height % |
|-------|-----------|---------|--------|---------|----------|
| 1     | 14.649    | 56076   | 1779   | 0.658   | 0.922    |
| 2     | 18.819    | 8464571 | 191256 | 99.342  | 99.078   |
| Total |           | 8520647 | 193035 | 100.000 | 100.000  |

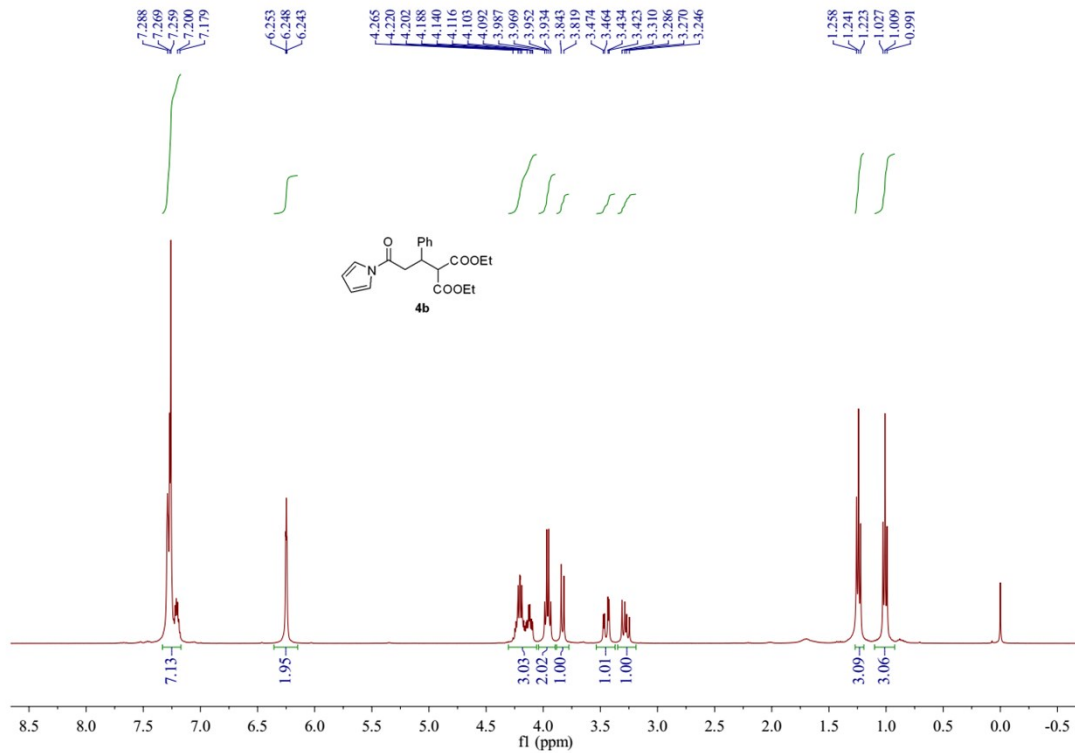

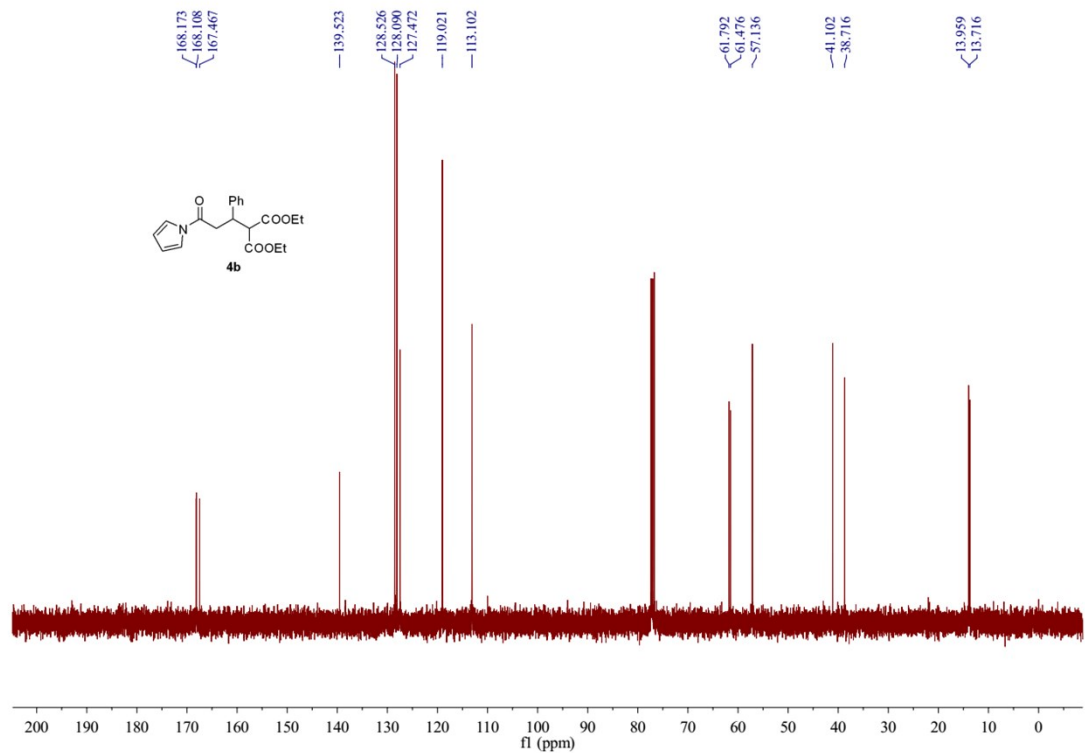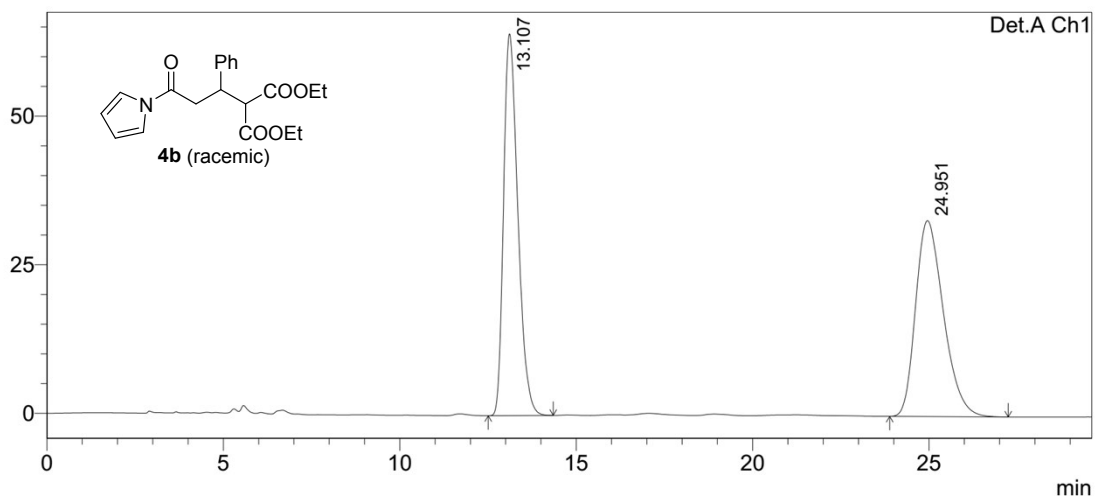

t.A Ch1/254nm

PeakTable

Detector A Ch1 254nm

| Peak# | Ret. Time | Area    | Height | Area %  | Height % |
|-------|-----------|---------|--------|---------|----------|
| 1     | 13.107    | 1806899 | 64243  | 49.975  | 66.091   |
| 2     | 24.951    | 1808672 | 32961  | 50.025  | 33.909   |
| Total |           | 3615571 | 97204  | 100.000 | 100.000  |

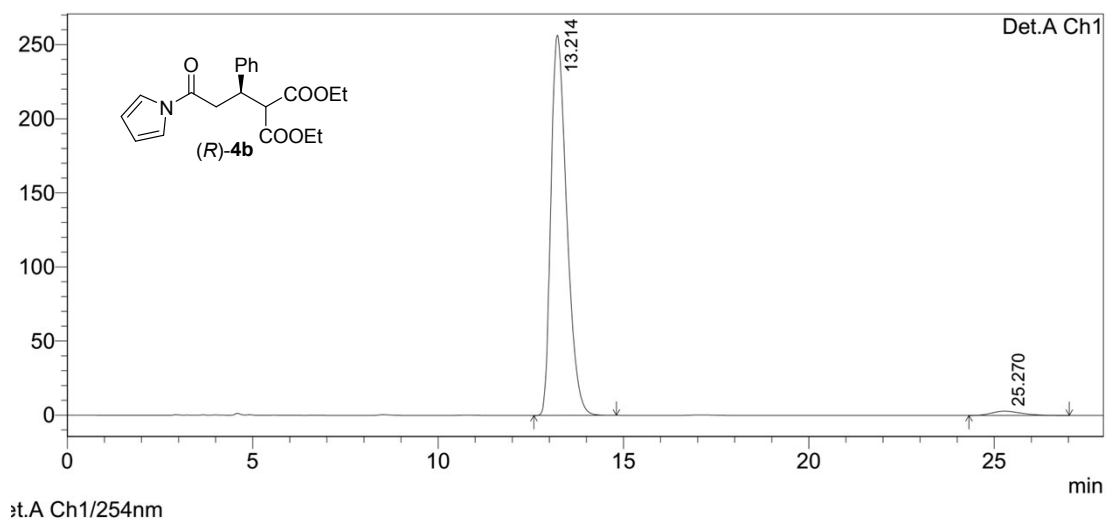

st.A Ch1/254nm

PeakTable

Detector A Ch1 254nm

| Peak# | Ret. Time | Area    | Height | Area %  | Height % |
|-------|-----------|---------|--------|---------|----------|
| 1     | 13.214    | 7619623 | 256560 | 97.956  | 98.900   |
| 2     | 25.270    | 158976  | 2855   | 2.044   | 1.100    |
| Total |           | 7778599 | 259415 | 100.000 | 100.000  |

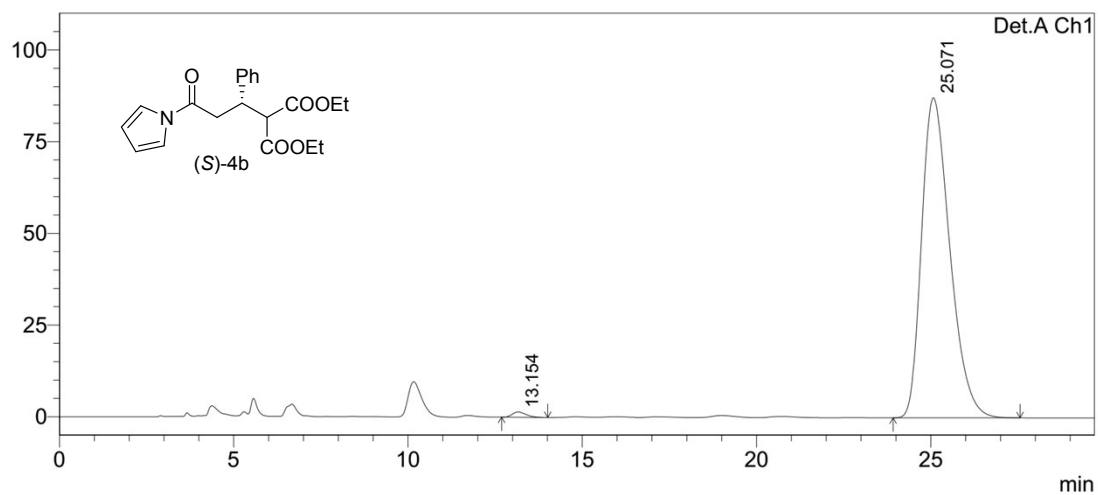

st.A Ch1/254nm

PeakTable

Detector A Ch1 254nm

| Peak# | Ret. Time | Area    | Height | Area %  | Height % |
|-------|-----------|---------|--------|---------|----------|
| 1     | 13.154    | 39610   | 1434   | 0.799   | 1.616    |
| 2     | 25.071    | 4919877 | 87263  | 99.201  | 98.384   |
| Total |           | 4959487 | 88697  | 100.000 | 100.000  |

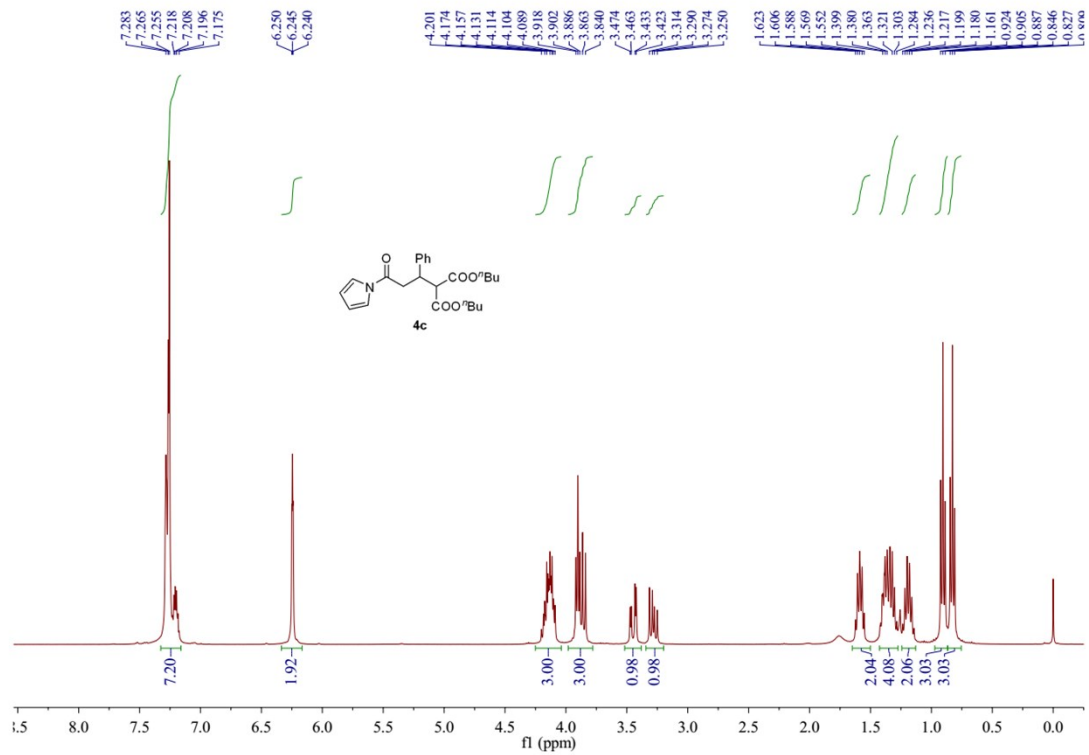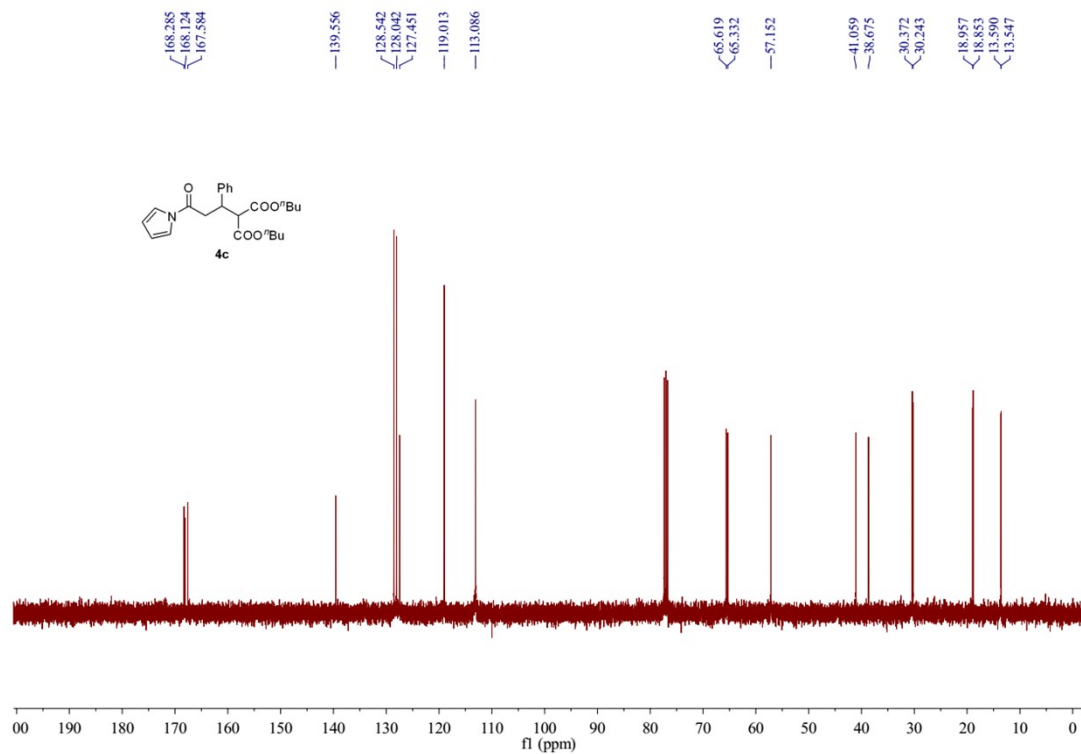

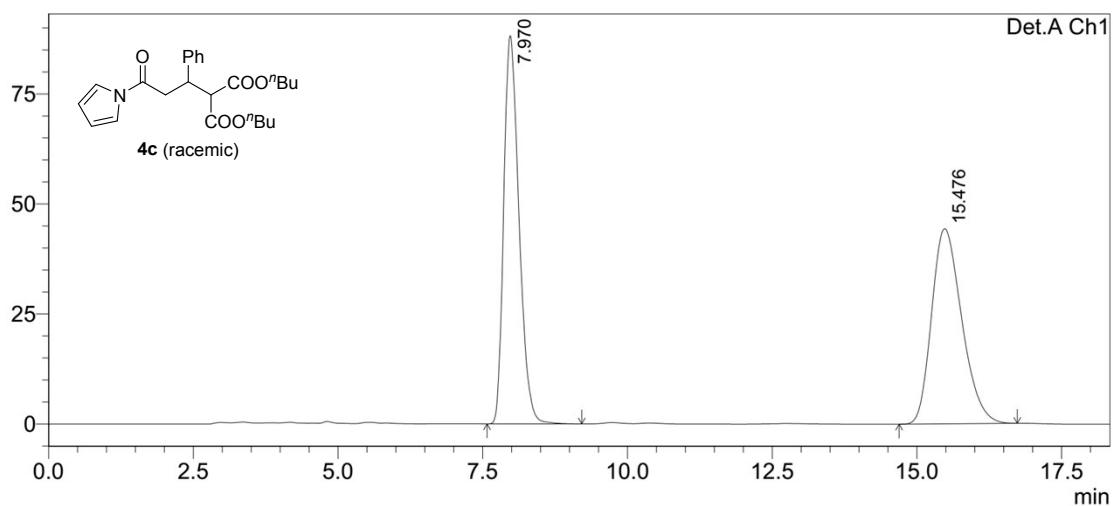

PeakTable

Detector A Ch1 254nm

| Peak# | Ret. Time | Area    | Height | Area %  | Height % |
|-------|-----------|---------|--------|---------|----------|
| 1     | 7.970     | 1617887 | 88229  | 50.184  | 66.549   |
| 2     | 15.476    | 1606052 | 44348  | 49.816  | 33.451   |
| Total |           | 3223939 | 132578 | 100.000 | 100.000  |

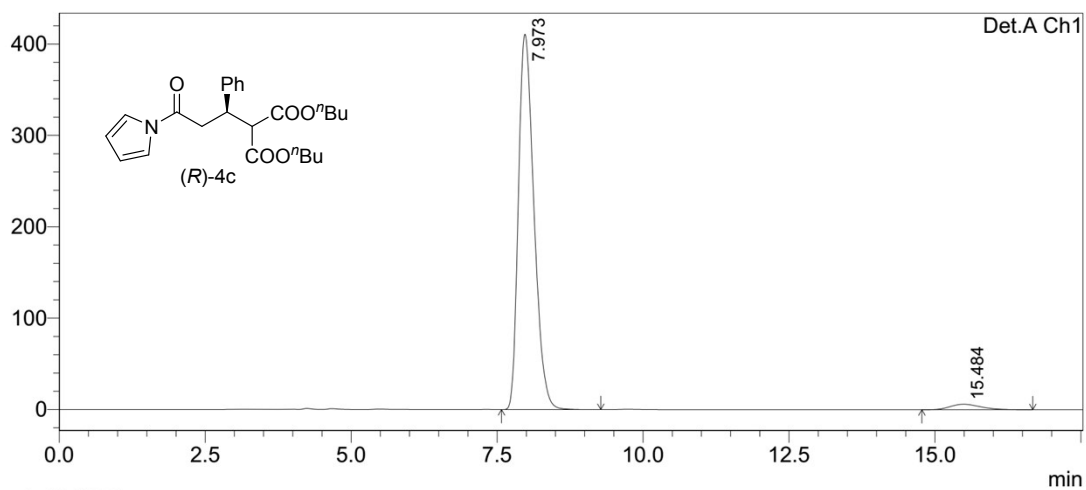

PeakTable

Detector A Ch1 254nm

| Peak# | Ret. Time | Area    | Height | Area %  | Height % |
|-------|-----------|---------|--------|---------|----------|
| 1     | 7.973     | 7614290 | 410924 | 97.243  | 98.565   |
| 2     | 15.484    | 215890  | 5983   | 2.757   | 1.435    |
| Total |           | 7830180 | 416907 | 100.000 | 100.000  |

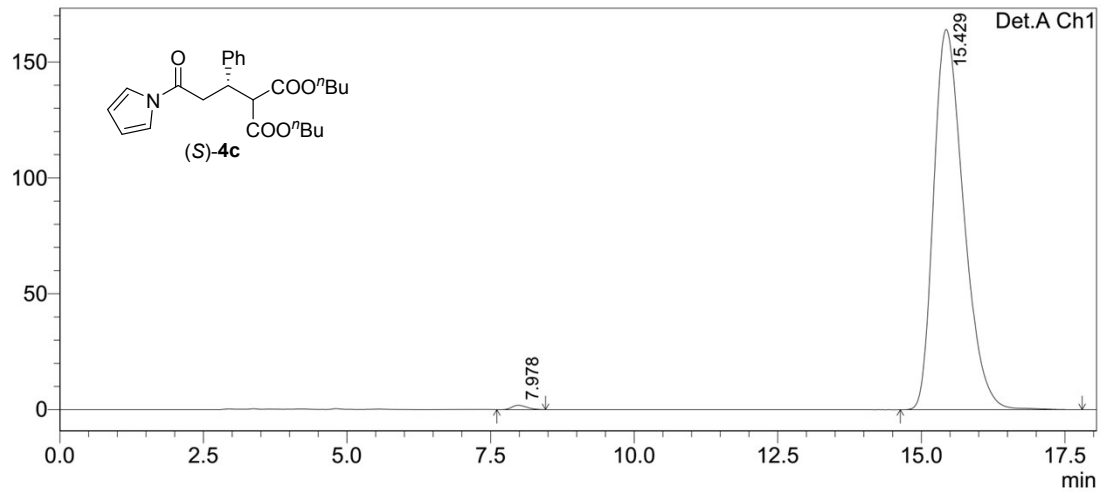

t.A Ch1/254nm

PeakTable

Detector A Ch1 254nm

| Peak# | Ret. Time | Area    | Height | Area %  | Height % |
|-------|-----------|---------|--------|---------|----------|
| 1     | 7.978     | 33484   | 1873   | 0.558   | 1.129    |
| 2     | 15.429    | 5966529 | 164080 | 99.442  | 98.871   |
| Total |           | 6000013 | 165953 | 100.000 | 100.000  |

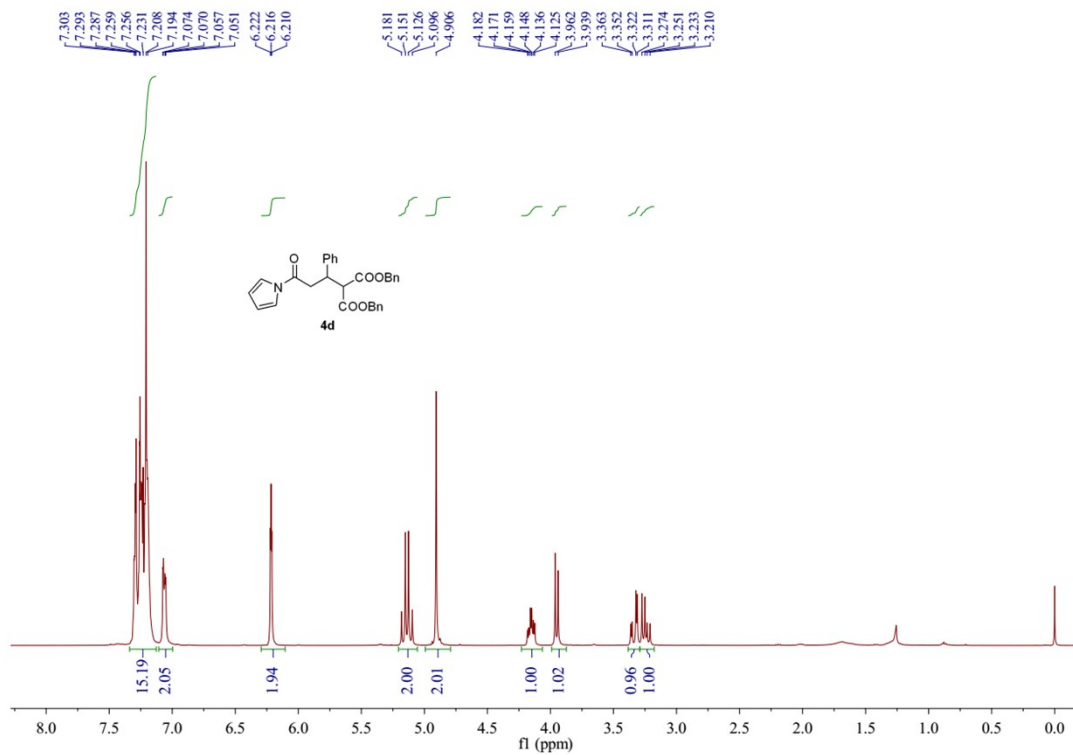



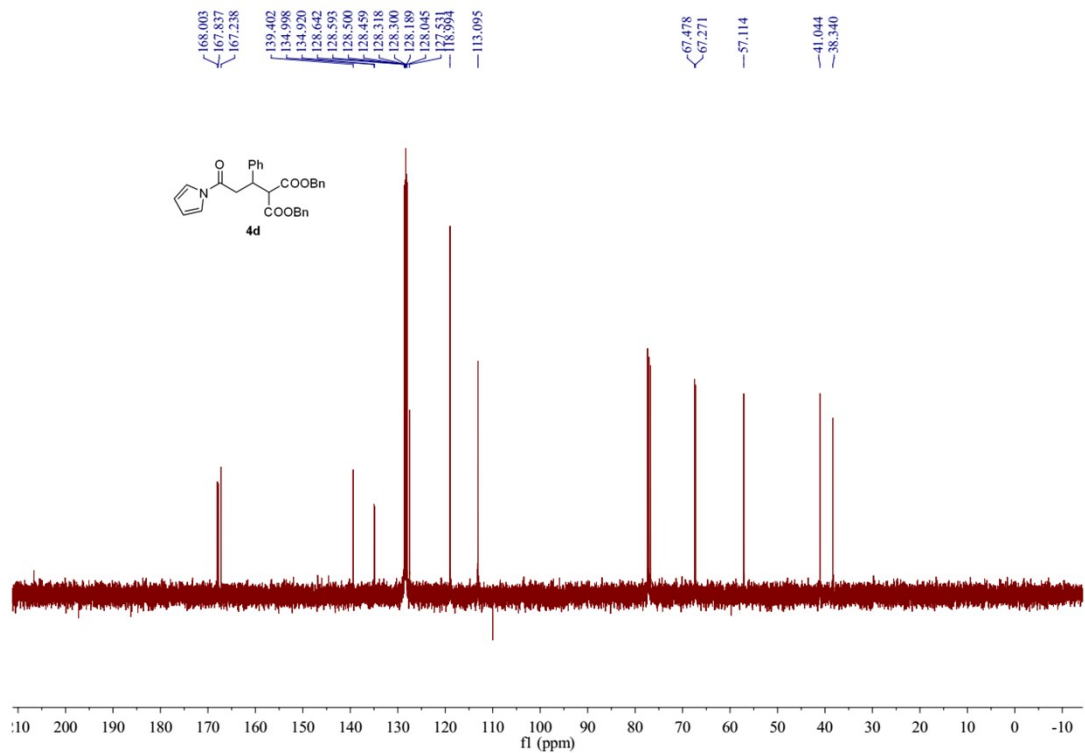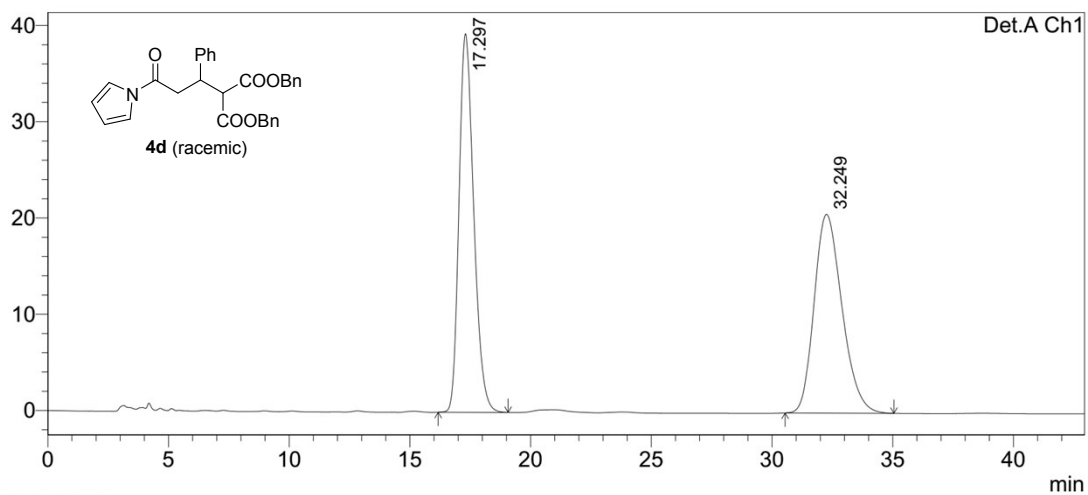

Det.A Ch1/254nm

PeakTable

Detector A Ch1 254nm

| Peak# | Ret. Time | Area    | Height | Area %  | Height % |
|-------|-----------|---------|--------|---------|----------|
| 1     | 17.297    | 1669075 | 39331  | 50.195  | 65.575   |
| 2     | 32.249    | 1656082 | 20648  | 49.805  | 34.425   |
| Total |           | 3325157 | 59979  | 100.000 | 100.000  |

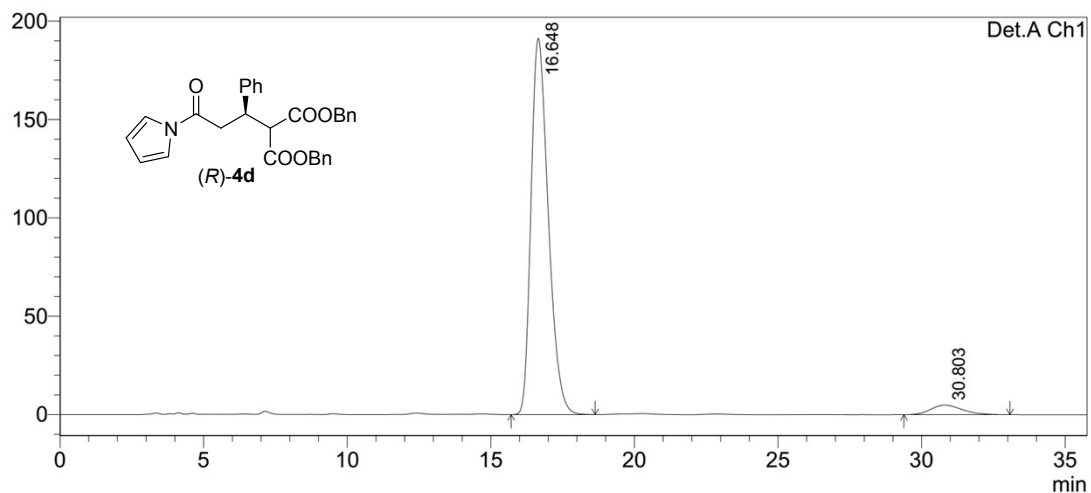

et.A Ch1/254nm

PeakTable

Detector A Ch1 254nm

| Peak# | Ret. Time | Area    | Height | Area %  | Height % |
|-------|-----------|---------|--------|---------|----------|
| 1     | 16.648    | 7990254 | 191241 | 95.602  | 97.529   |
| 2     | 30.803    | 367611  | 4846   | 4.398   | 2.471    |
| Total |           | 8357865 | 196088 | 100.000 | 100.000  |

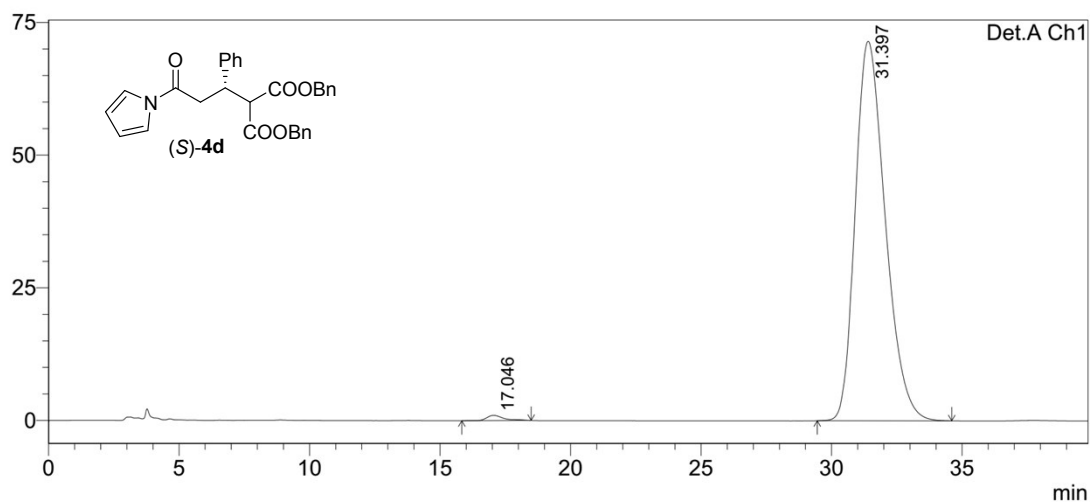

et.A Ch1/254nm

PeakTable

Detector A Ch1 254nm

| Peak# | Ret. Time | Area    | Height | Area %  | Height % |
|-------|-----------|---------|--------|---------|----------|
| 1     | 17.046    | 44704   | 985    | 0.776   | 1.359    |
| 2     | 31.397    | 5714601 | 71508  | 99.224  | 98.641   |
| Total |           | 5759305 | 72493  | 100.000 | 100.000  |

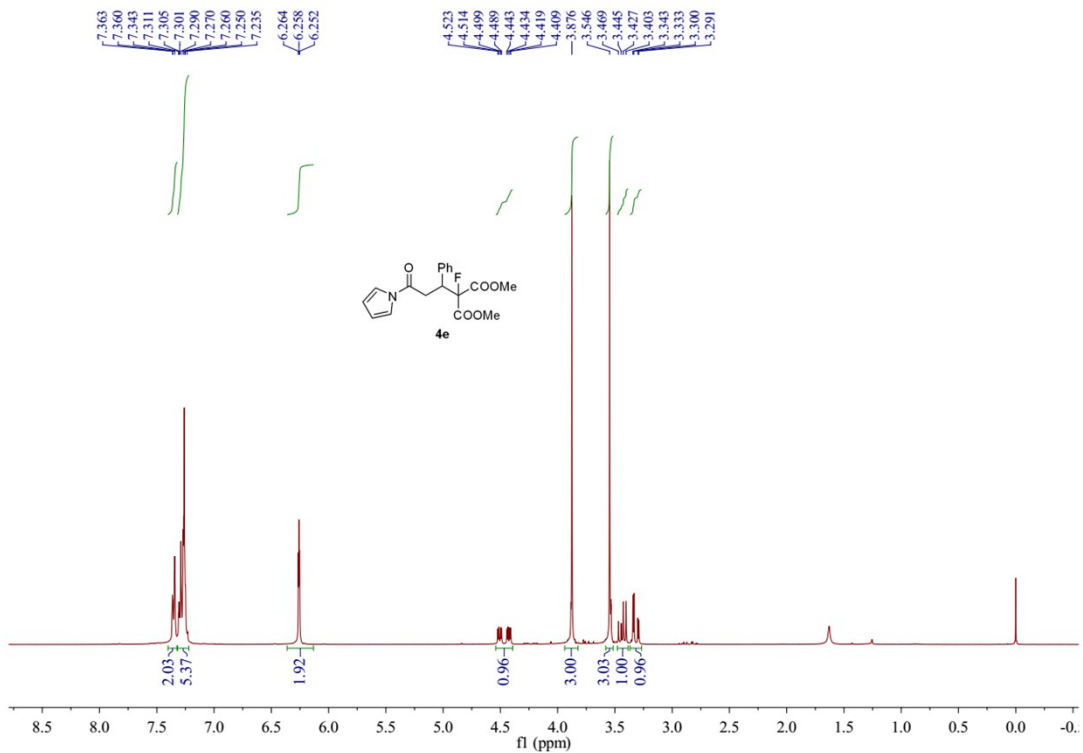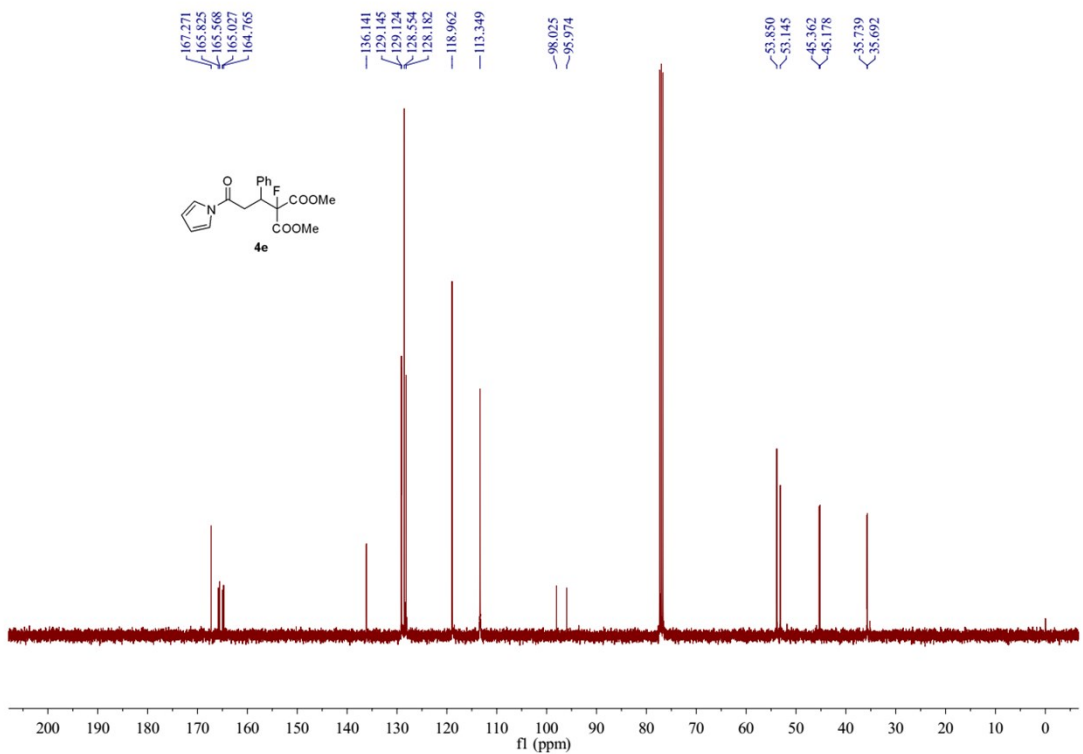

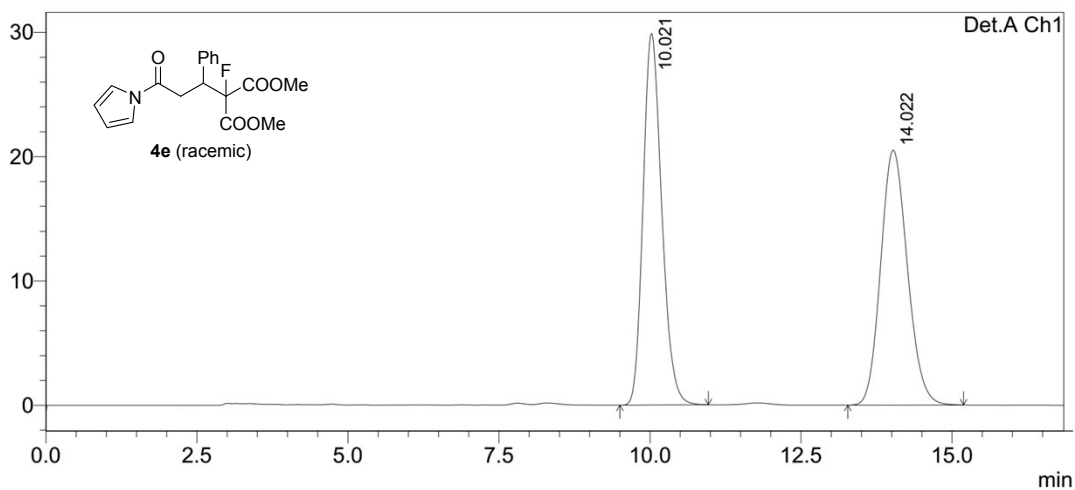

t.A Ch1/254nm

PeakTable

Detector A Ch1 254nm

| Peak# | Ret. Time | Area    | Height | Area %  | Height % |
|-------|-----------|---------|--------|---------|----------|
| 1     | 10.021    | 641334  | 29894  | 50.402  | 59.313   |
| 2     | 14.022    | 631112  | 20507  | 49.598  | 40.687   |
| Total |           | 1272446 | 50401  | 100.000 | 100.000  |

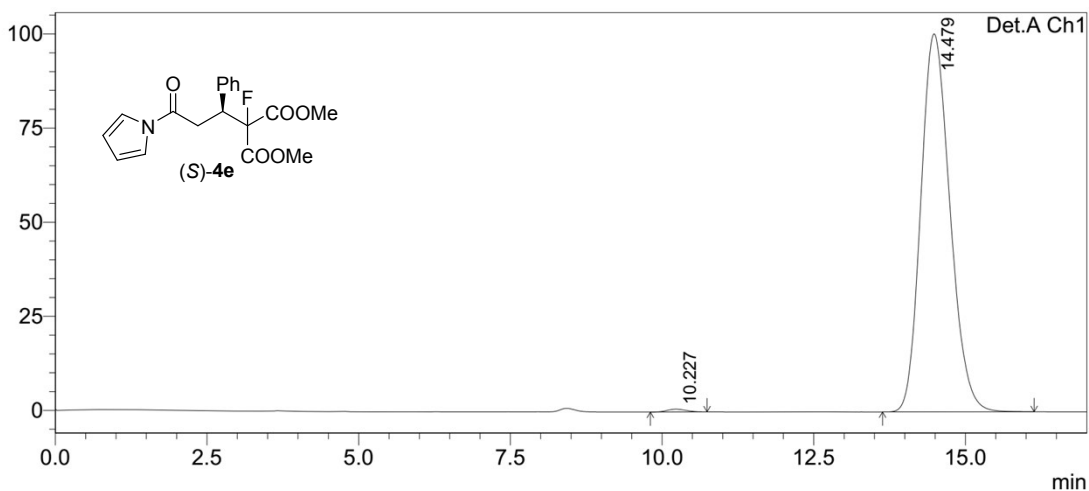

et.A Ch1/254nm

PeakTable

Detector A Ch1 254nm

| Peak# | Ret. Time | Area    | Height | Area %  | Height % |
|-------|-----------|---------|--------|---------|----------|
| 1     | 10.227    | 16075   | 756    | 0.476   | 0.747    |
| 2     | 14.479    | 3358143 | 100452 | 99.524  | 99.253   |
| Total |           | 3374218 | 101208 | 100.000 | 100.000  |

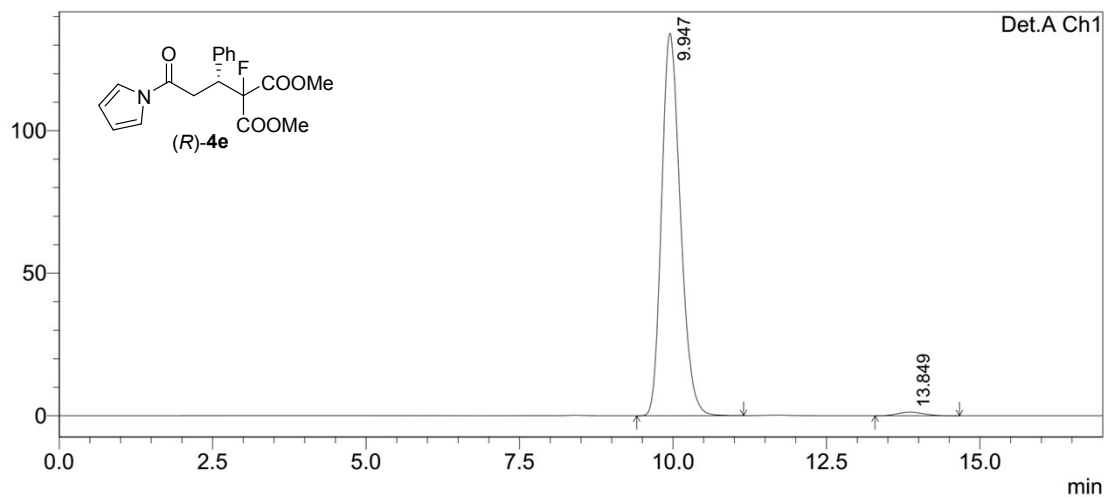

st.A Ch1/254nm

PeakTable

Detector A Ch1 254nm

| Peak# | Ret. Time | Area    | Height | Area %  | Height % |
|-------|-----------|---------|--------|---------|----------|
| 1     | 9.947     | 2858328 | 134180 | 98.717  | 99.075   |
| 2     | 13.849    | 37143   | 1253   | 1.283   | 0.925    |
| Total |           | 2895471 | 135433 | 100.000 | 100.000  |

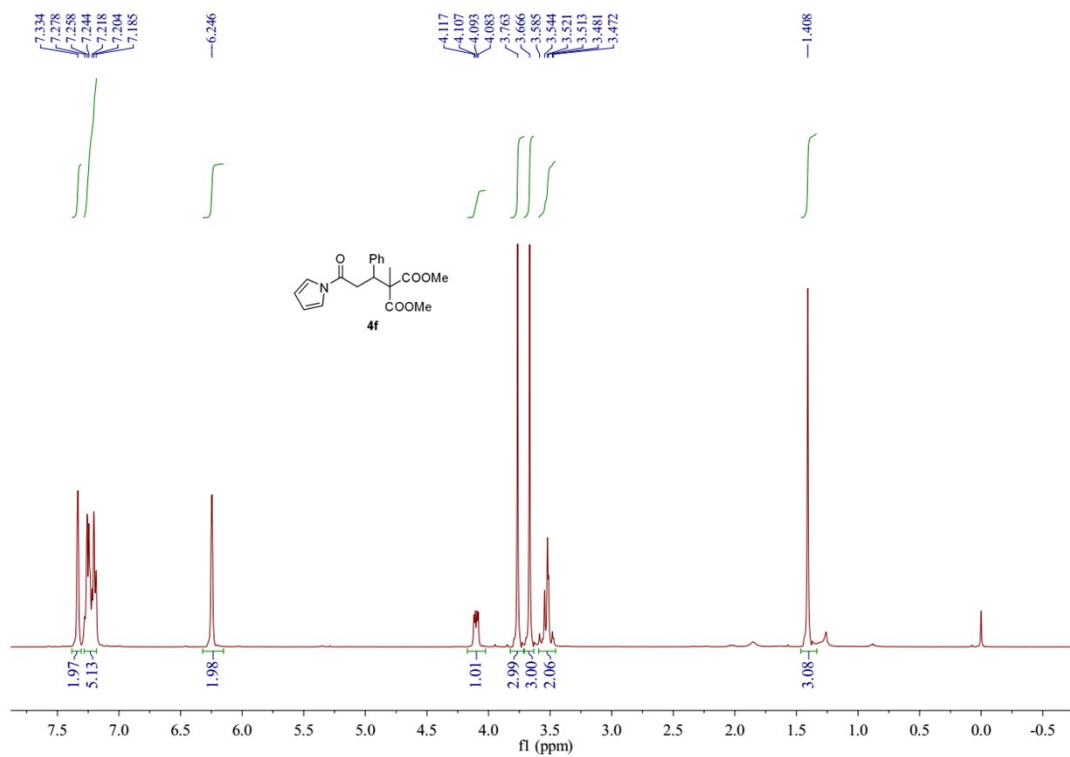

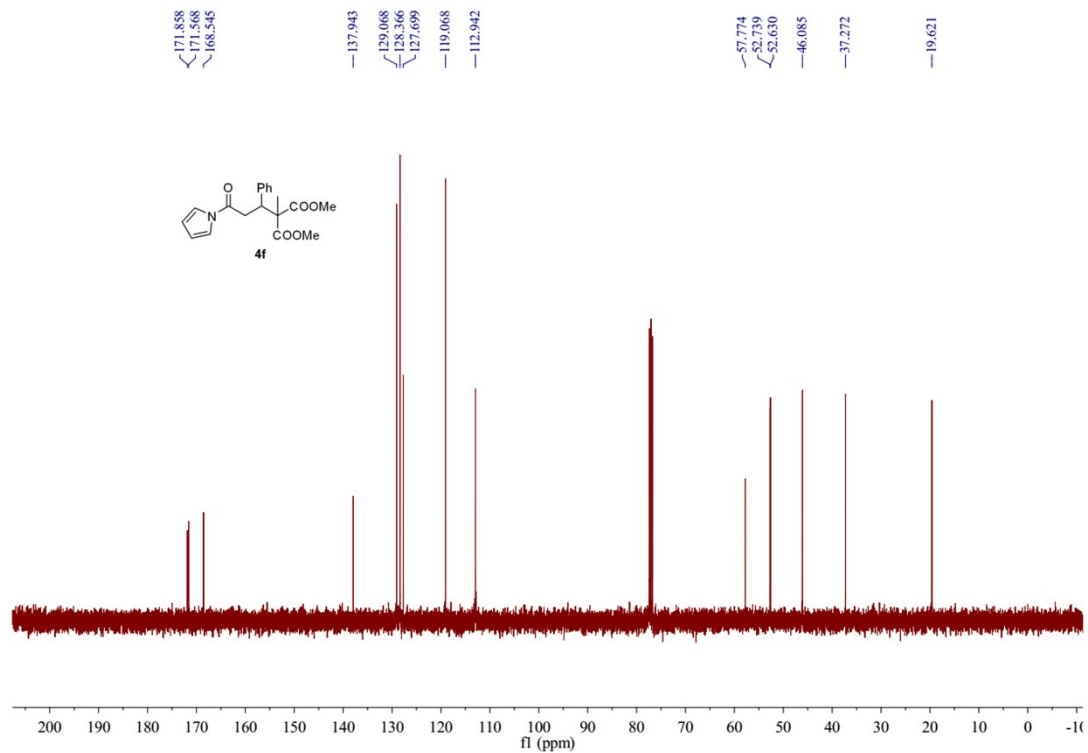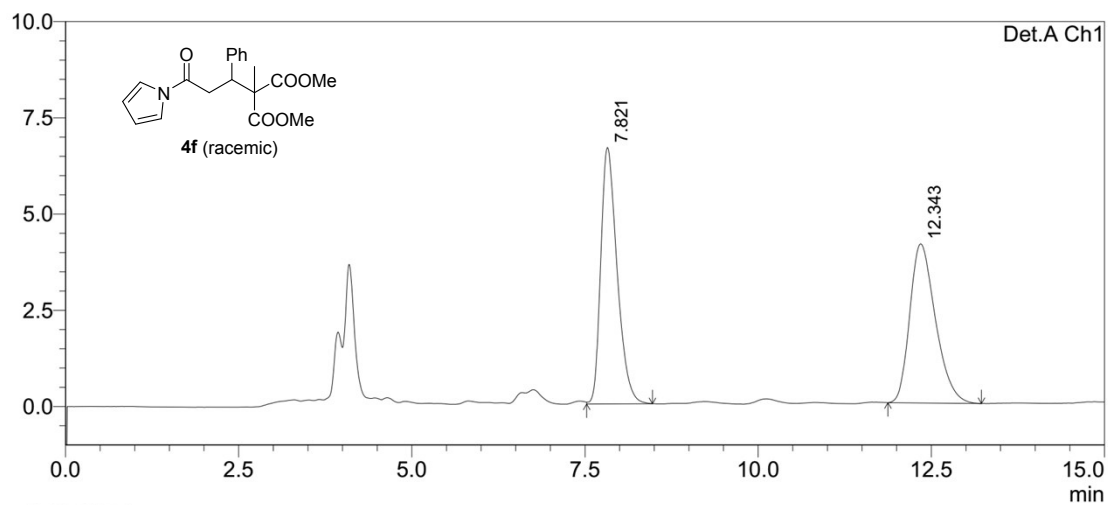

st.A Ch1/254nm

PeakTable

Detector A Ch1 254nm

| Peak# | Ret. Time | Area   | Height | Area %  | Height % |
|-------|-----------|--------|--------|---------|----------|
| 1     | 7.821     | 109483 | 6664   | 50.678  | 61.711   |
| 2     | 12.343    | 106554 | 4135   | 49.322  | 38.289   |
| Total |           | 216037 | 10798  | 100.000 | 100.000  |

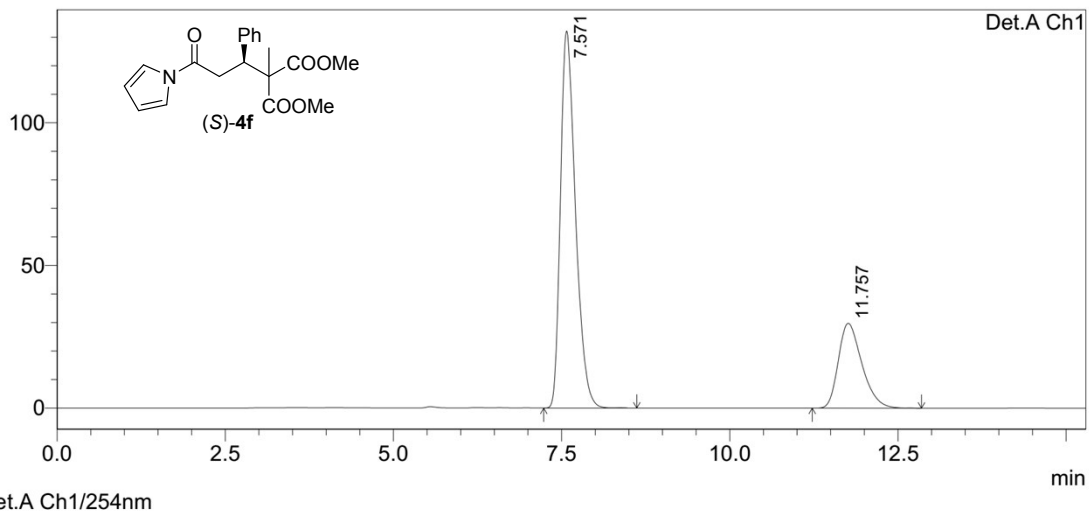

st.A Ch1/254nm

PeakTable

Detector A Ch1 254nm

| Peak# | Ret. Time | Area    | Height | Area %  | Height % |
|-------|-----------|---------|--------|---------|----------|
| 1     | 7.571     | 2054751 | 132213 | 73.923  | 81.635   |
| 2     | 11.757    | 724836  | 29743  | 26.077  | 18.365   |
| Total |           | 2779587 | 161956 | 100.000 | 100.000  |

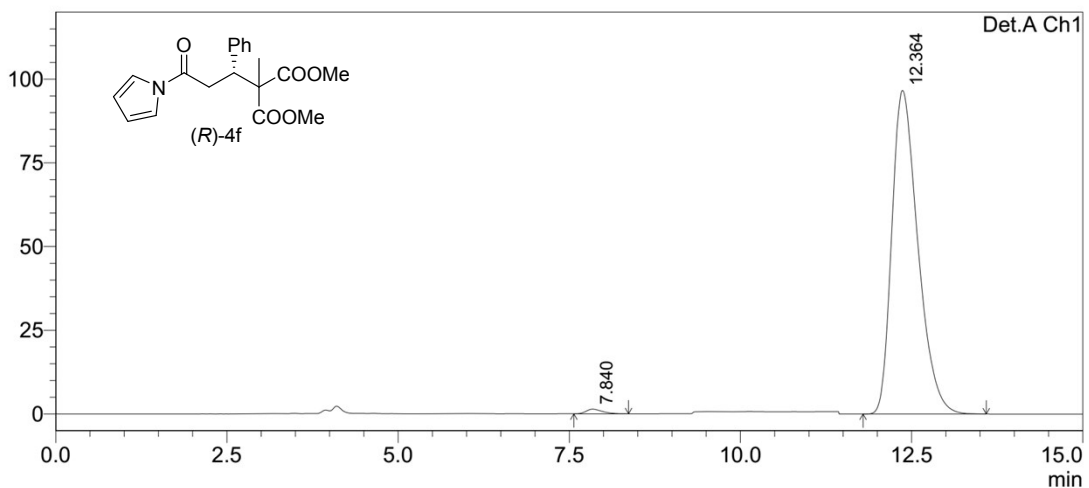

st.A Ch1/254nm

PeakTable

Detector A Ch1 254nm

| Peak# | Ret. Time | Area    | Height | Area %  | Height % |
|-------|-----------|---------|--------|---------|----------|
| 1     | 7.840     | 23055   | 1402   | 0.891   | 1.429    |
| 2     | 12.364    | 2564105 | 96676  | 99.109  | 98.571   |
| Total |           | 2587160 | 98078  | 100.000 | 100.000  |

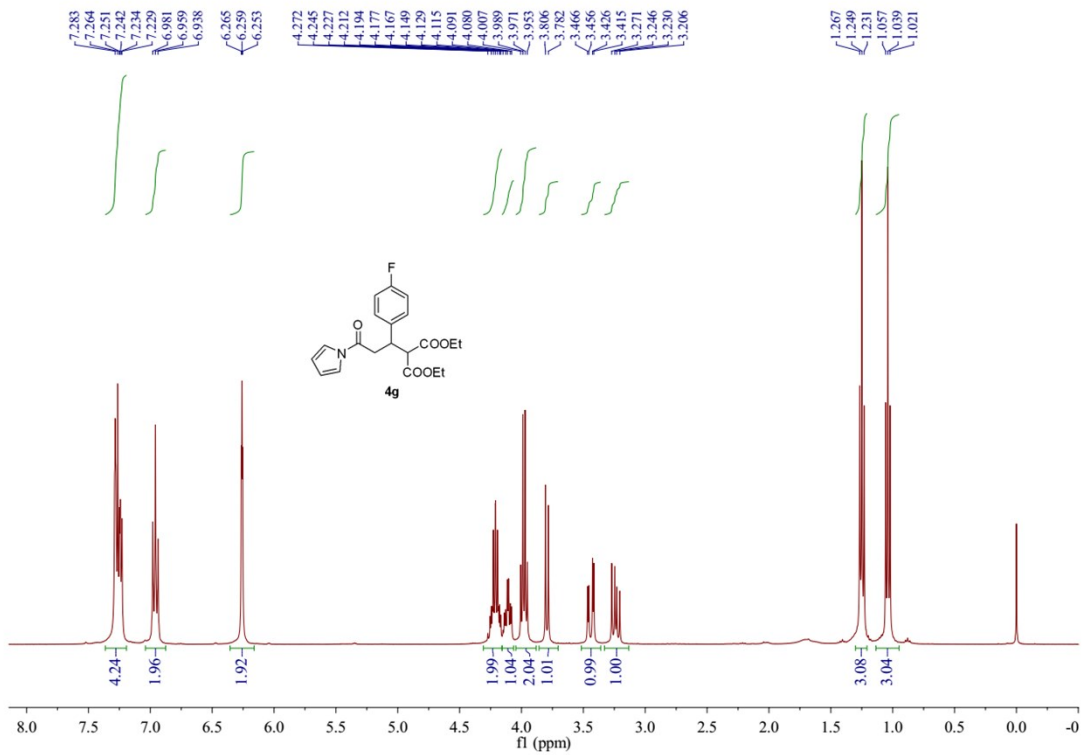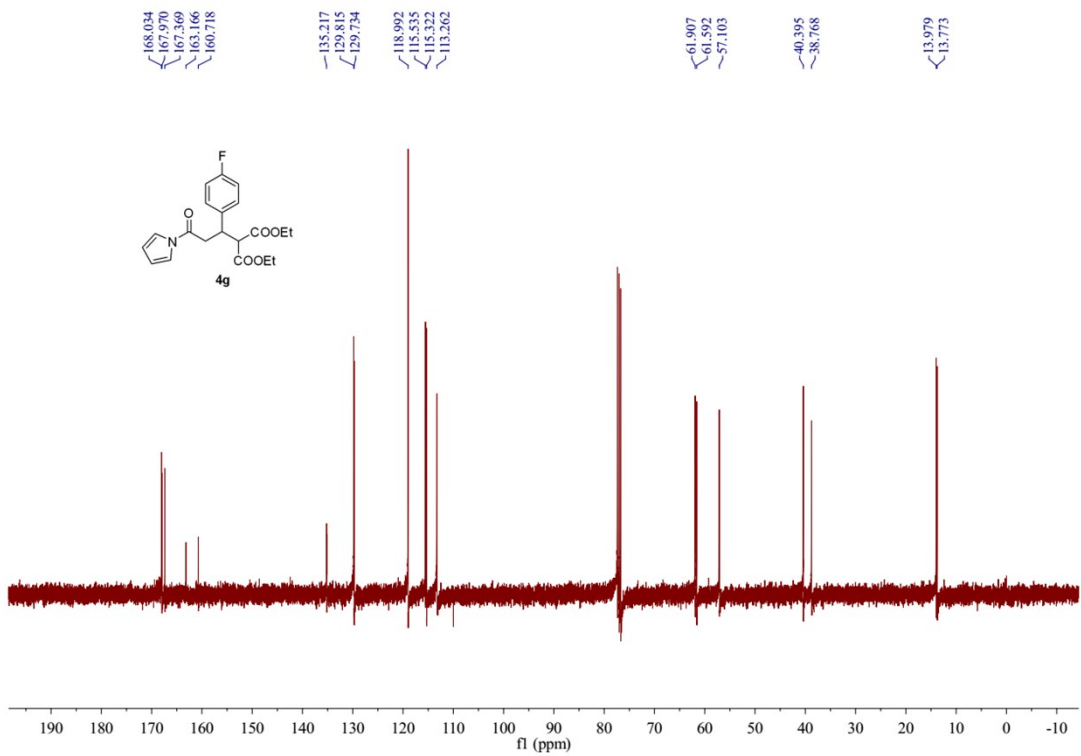



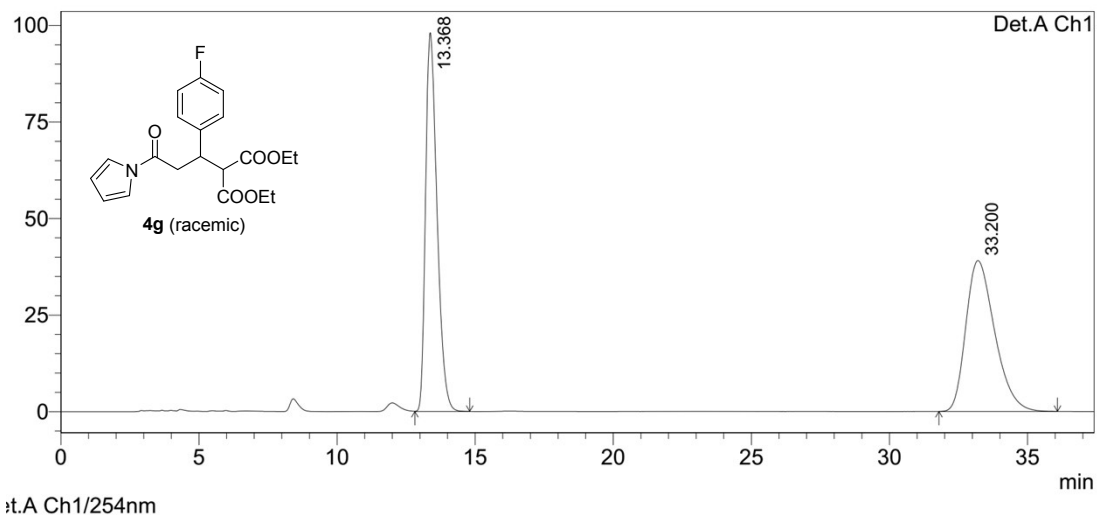

PeakTable

Detector A Ch1 254nm

| Peak# | Ret. Time | Area    | Height | Area %  | Height % |
|-------|-----------|---------|--------|---------|----------|
| 1     | 13.368    | 2831828 | 98107  | 49.927  | 71.526   |
| 2     | 33.200    | 2840150 | 39056  | 50.073  | 28.474   |
| Total |           | 5671978 | 137163 | 100.000 | 100.000  |

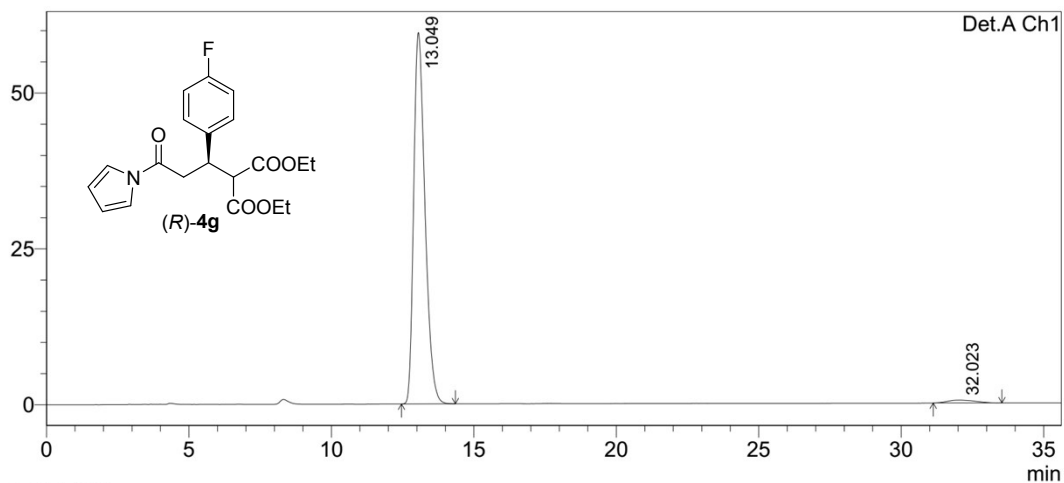

PeakTable

Detector A Ch1 254nm

| Peak# | Ret. Time | Area    | Height | Area %  | Height % |
|-------|-----------|---------|--------|---------|----------|
| 1     | 13.049    | 1640419 | 59571  | 98.114  | 99.188   |
| 2     | 32.023    | 31525   | 488    | 1.886   | 0.812    |
| Total |           | 1671944 | 60059  | 100.000 | 100.000  |

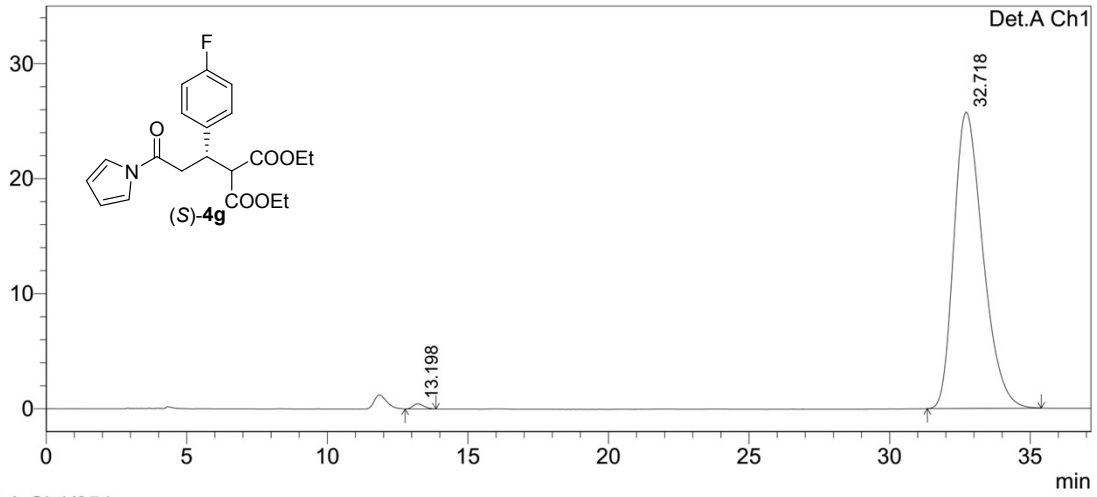

t.A Ch1/254nm

PeakTable

Detector A Ch1 254nm

| Peak# | Ret. Time | Area    | Height | Area %  | Height % |
|-------|-----------|---------|--------|---------|----------|
| 1     | 13.198    | 11891   | 447    | 0.639   | 1.705    |
| 2     | 32.718    | 1849917 | 25760  | 99.361  | 98.295   |
| Total |           | 1861809 | 26207  | 100.000 | 100.000  |

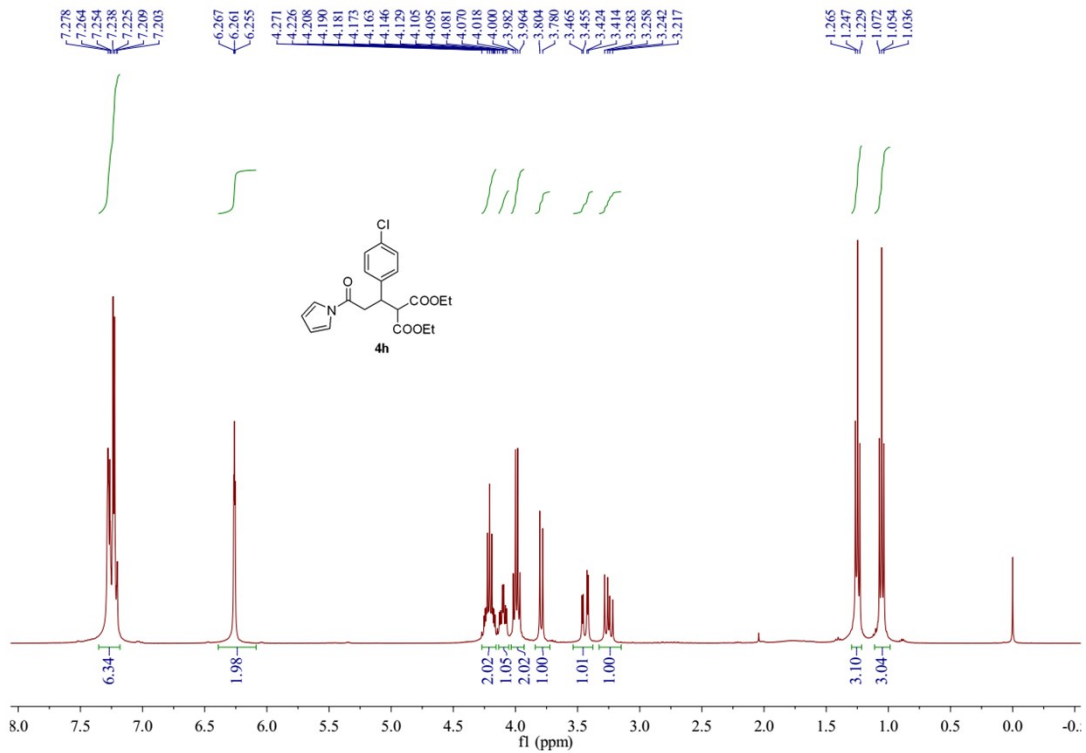

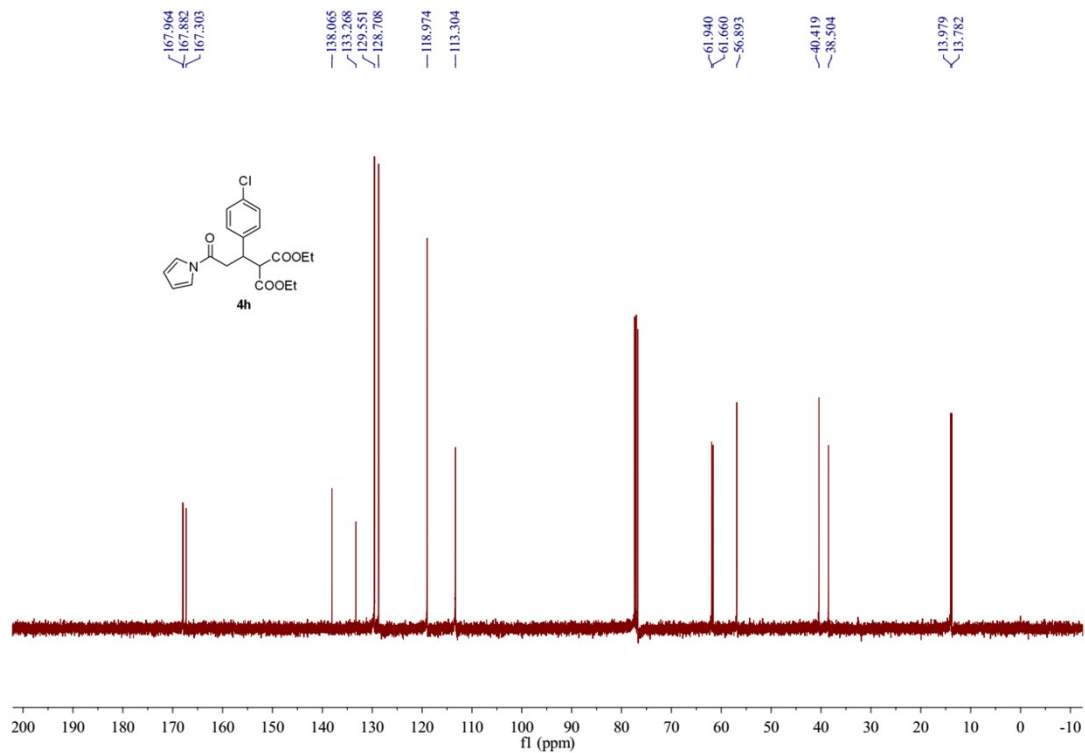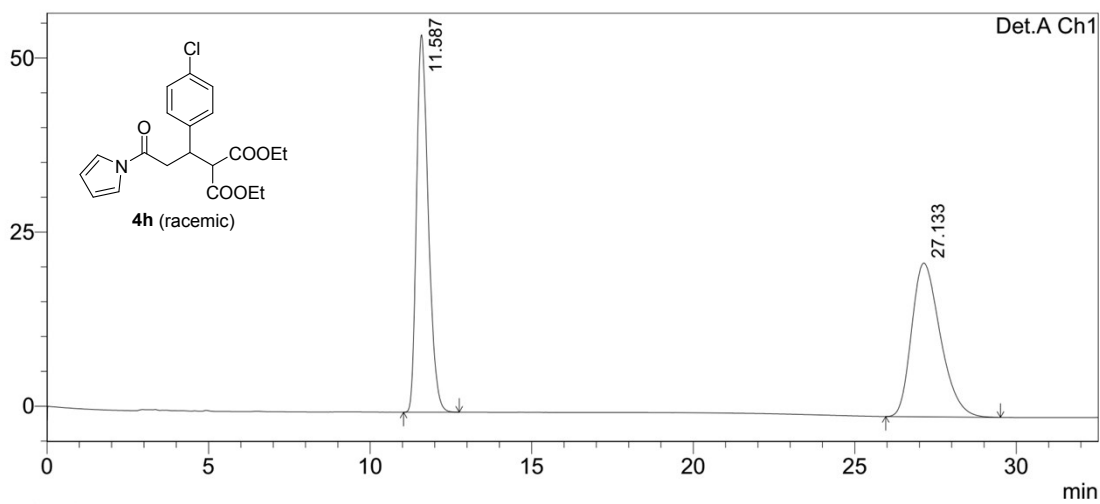

t.A Ch1/254nm

PeakTable

Detector A Ch1 254nm

| Peak# | Ret. Time | Area    | Height | Area %  | Height % |
|-------|-----------|---------|--------|---------|----------|
| 1     | 11.587    | 1374213 | 54208  | 50.145  | 71.059   |
| 2     | 27.133    | 1366255 | 22078  | 49.855  | 28.941   |
| Total |           | 2740468 | 76286  | 100.000 | 100.000  |

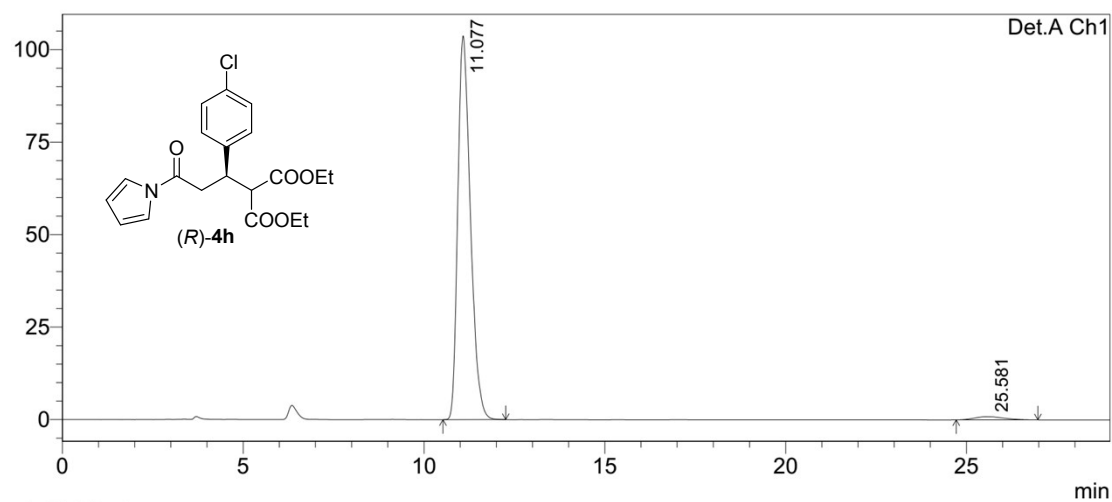

t.A Ch1/254nm

PeakTable

Detector A Ch1 254nm

| Peak# | Ret. Time | Area    | Height | Area %  | Height % |
|-------|-----------|---------|--------|---------|----------|
| 1     | 11.077    | 2516746 | 103733 | 98.101  | 99.166   |
| 2     | 25.581    | 48727   | 872    | 1.899   | 0.834    |
| Total |           | 2565472 | 104605 | 100.000 | 100.000  |

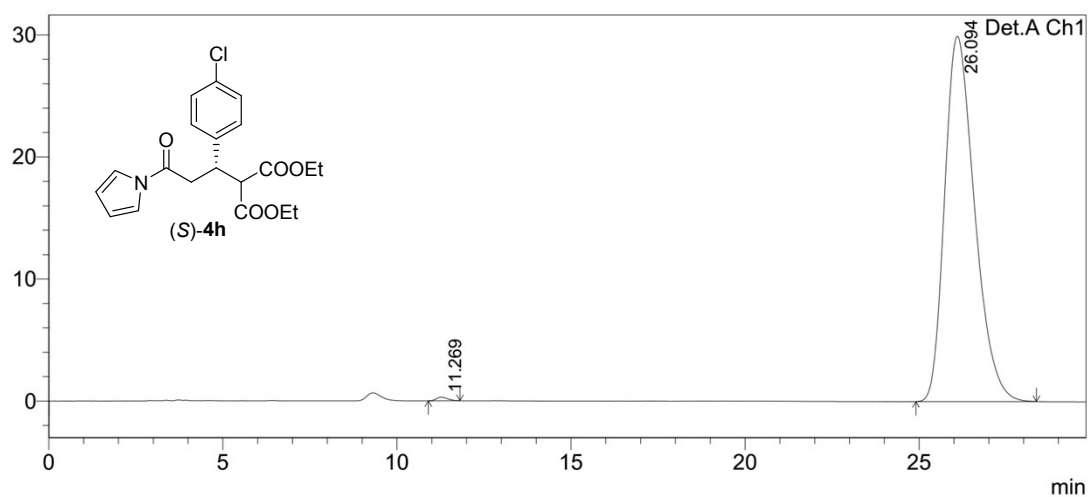

st.A Ch1/254nm

PeakTable

Detector A Ch1 254nm

| Peak# | Ret. Time | Area    | Height | Area %  | Height % |
|-------|-----------|---------|--------|---------|----------|
| 1     | 11.269    | 6758    | 294    | 0.376   | 0.973    |
| 2     | 26.094    | 1790103 | 29931  | 99.624  | 99.027   |
| Total |           | 1796862 | 30225  | 100.000 | 100.000  |

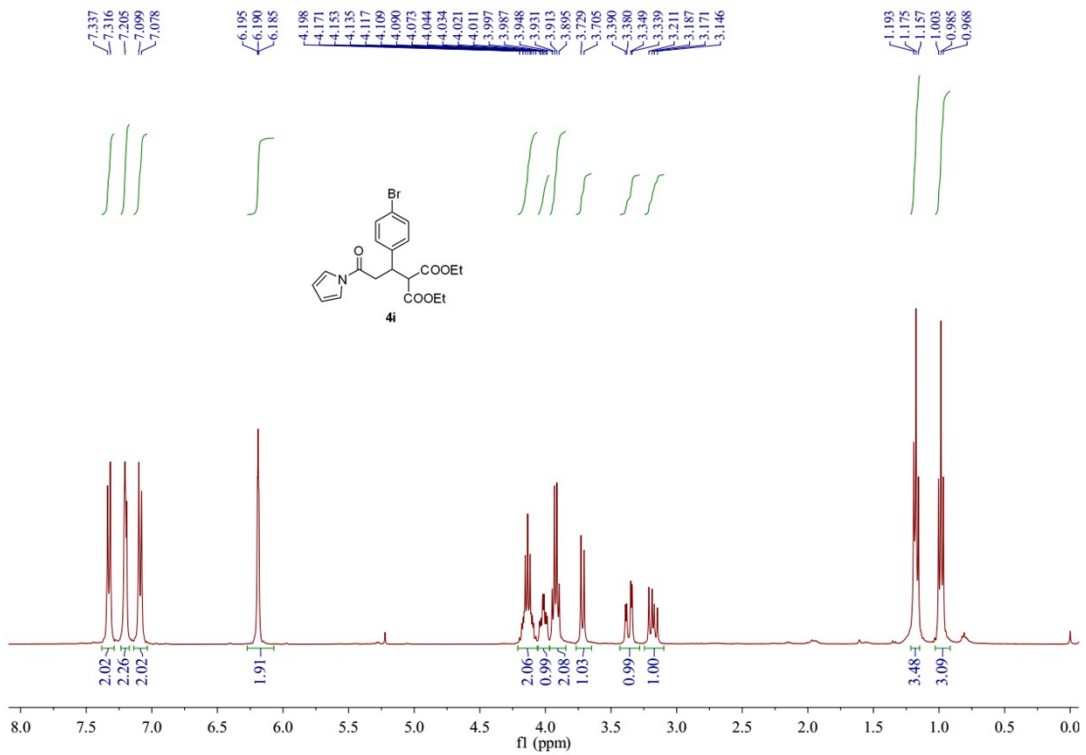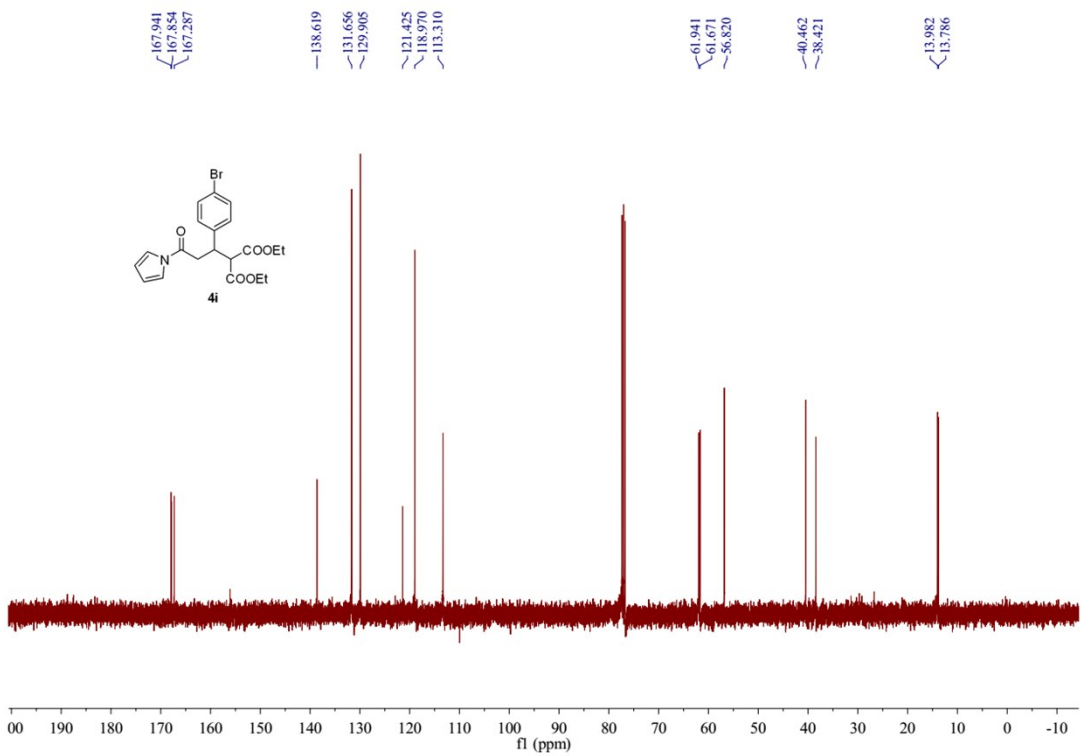

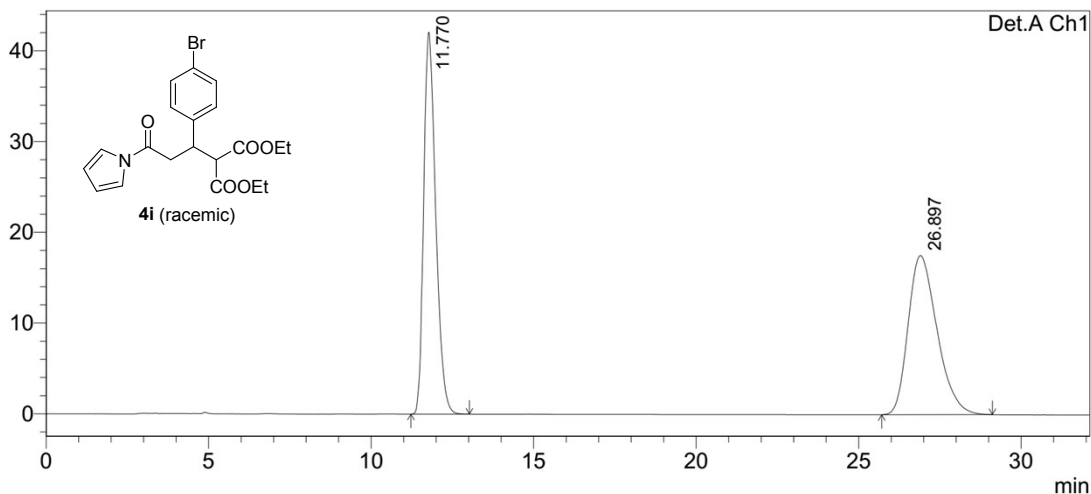

t.A Ch1/254nm

PeakTable

Detector A Ch1 254nm

| Peak# | Ret. Time | Area    | Height | Area %  | Height % |
|-------|-----------|---------|--------|---------|----------|
| 1     | 11.770    | 1084113 | 42094  | 49.965  | 70.588   |
| 2     | 26.897    | 1085622 | 17539  | 50.035  | 29.412   |
| Total |           | 2169735 | 59632  | 100.000 | 100.000  |

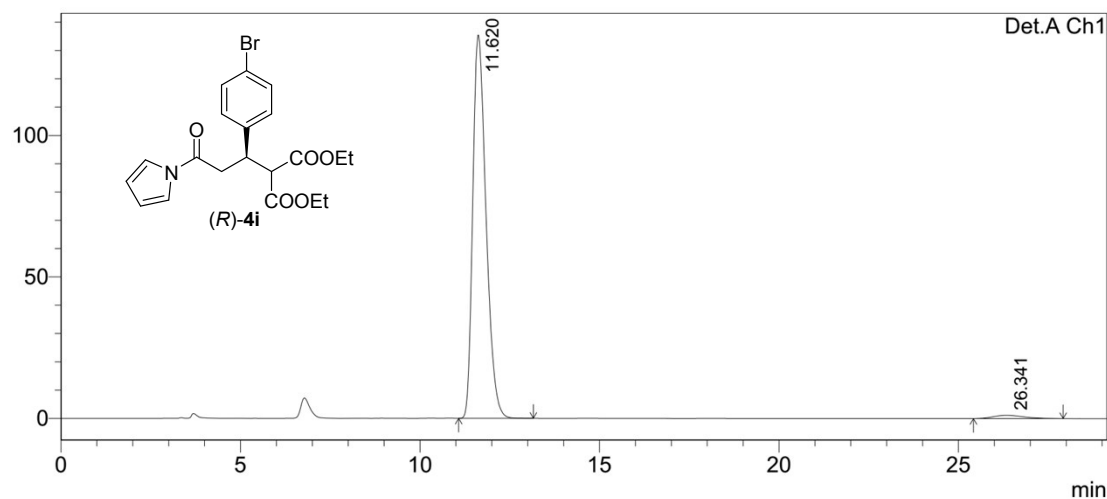

t.A Ch1/254nm

PeakTable

Detector A Ch1 254nm

| Peak# | Ret. Time | Area    | Height | Area %  | Height % |
|-------|-----------|---------|--------|---------|----------|
| 1     | 11.620    | 3476953 | 135511 | 98.073  | 99.145   |
| 2     | 26.341    | 68311   | 1169   | 1.927   | 0.855    |
| Total |           | 3545264 | 136680 | 100.000 | 100.000  |

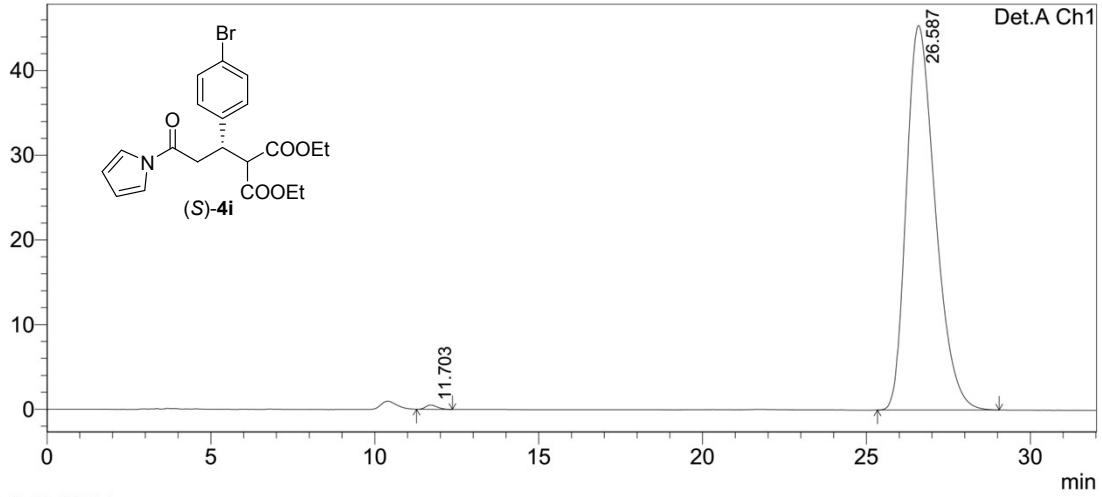

t.A Ch1/254nm

PeakTable

Detector A Ch1 254nm

| Peak# | Ret. Time | Area    | Height | Area %  | Height % |
|-------|-----------|---------|--------|---------|----------|
| 1     | 11.703    | 12397   | 509    | 0.443   | 1.109    |
| 2     | 26.587    | 2787968 | 45411  | 99.557  | 98.891   |
| Total |           | 2800365 | 45920  | 100.000 | 100.000  |

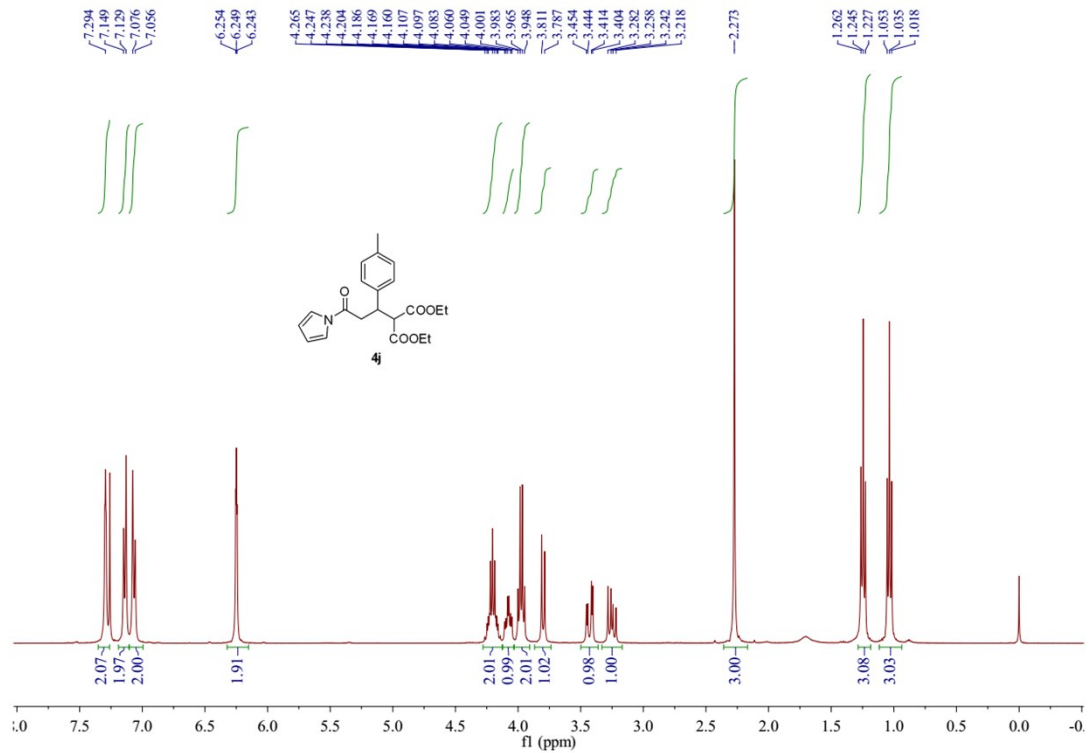

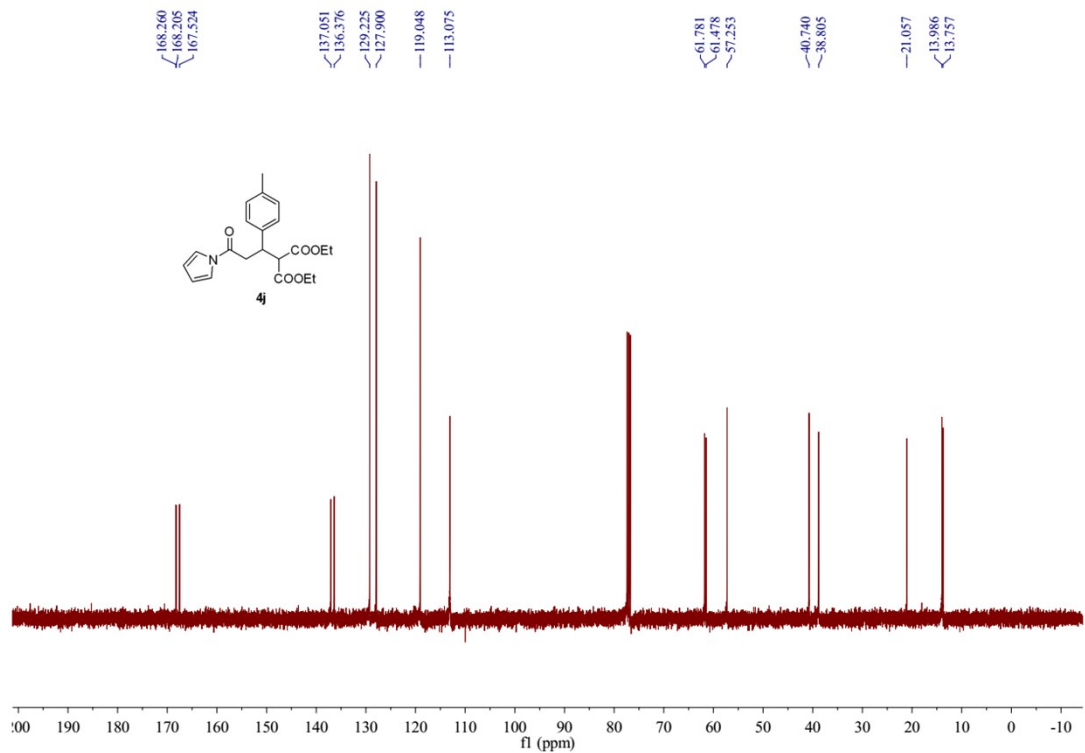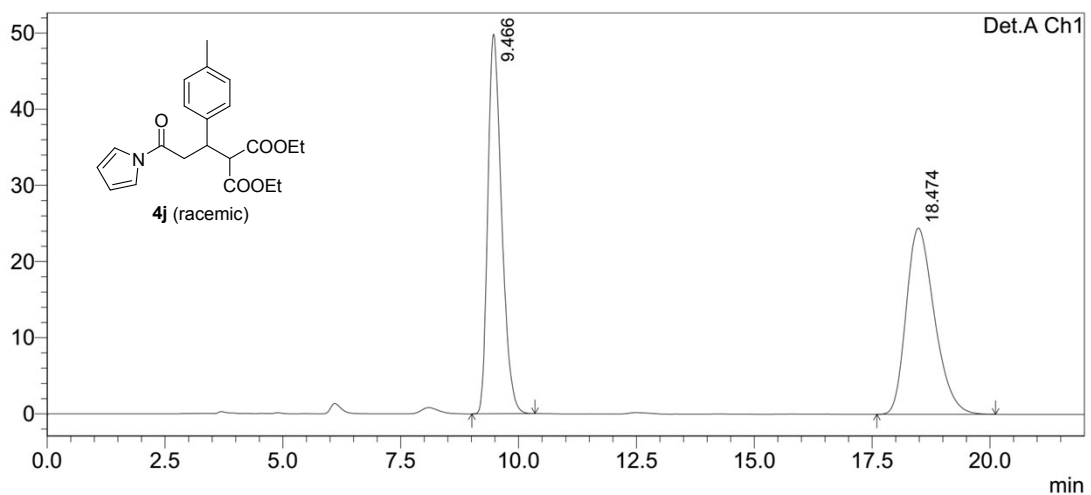

..A Ch1/254nm

PeakTable

Detector A Ch1 254nm

| Peak# | Ret. Time | Area    | Height | Area %  | Height % |
|-------|-----------|---------|--------|---------|----------|
| 1     | 9.466     | 1016101 | 49835  | 49.932  | 67.079   |
| 2     | 18.474    | 1018879 | 24458  | 50.068  | 32.921   |
| Total |           | 2034980 | 74293  | 100.000 | 100.000  |



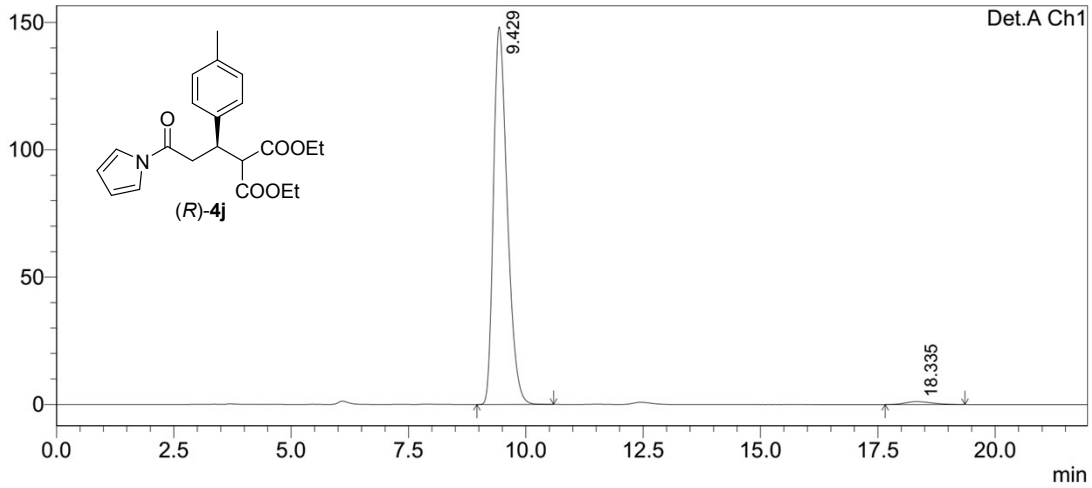

t.A Ch1/254nm

PeakTable

Detector A Ch1 254nm

| Peak# | Ret. Time | Area    | Height | Area %  | Height % |
|-------|-----------|---------|--------|---------|----------|
| 1     | 9.429     | 3038736 | 148291 | 98.515  | 99.239   |
| 2     | 18.335    | 45794   | 1137   | 1.485   | 0.761    |
| Total |           | 3084530 | 149427 | 100.000 | 100.000  |

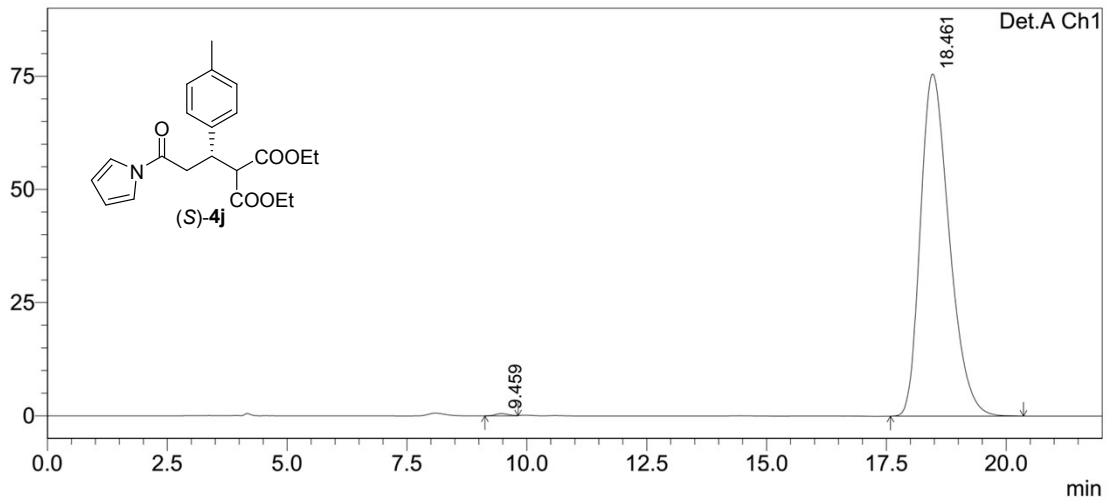

.A Ch1/254nm

PeakTable

Detector A Ch1 254nm

| Peak# | Ret. Time | Area    | Height | Area %  | Height % |
|-------|-----------|---------|--------|---------|----------|
| 1     | 9.459     | 10131   | 504    | 0.320   | 0.663    |
| 2     | 18.461    | 3159396 | 75573  | 99.680  | 99.337   |
| Total |           | 3169527 | 76078  | 100.000 | 100.000  |

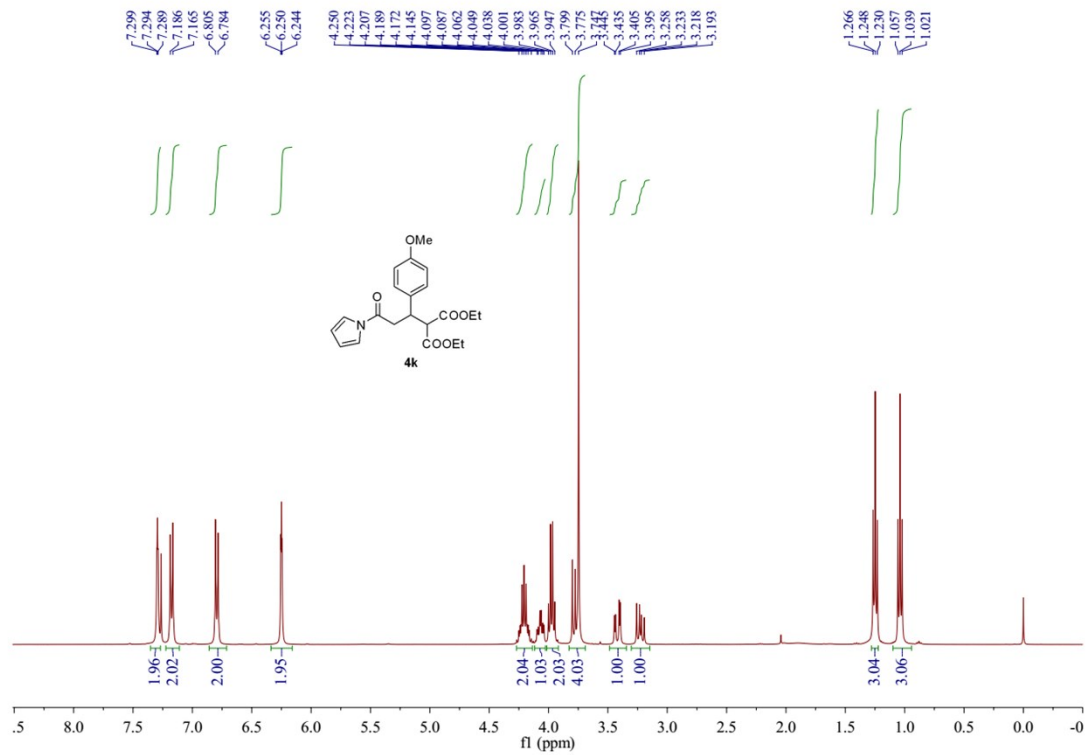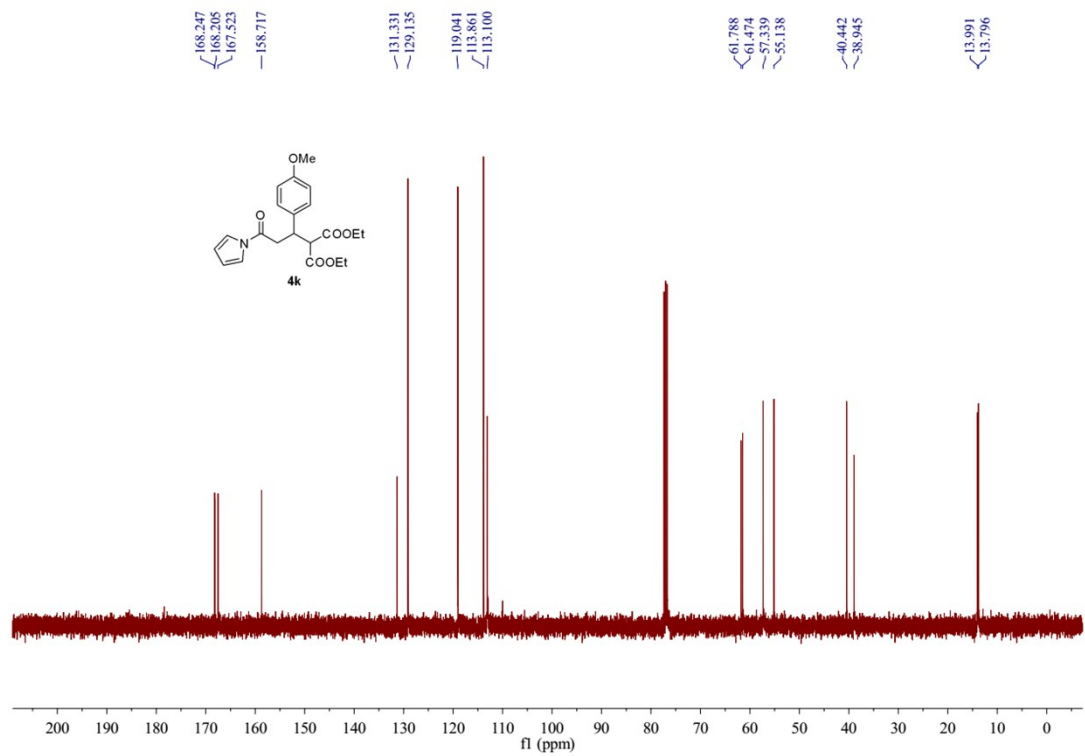

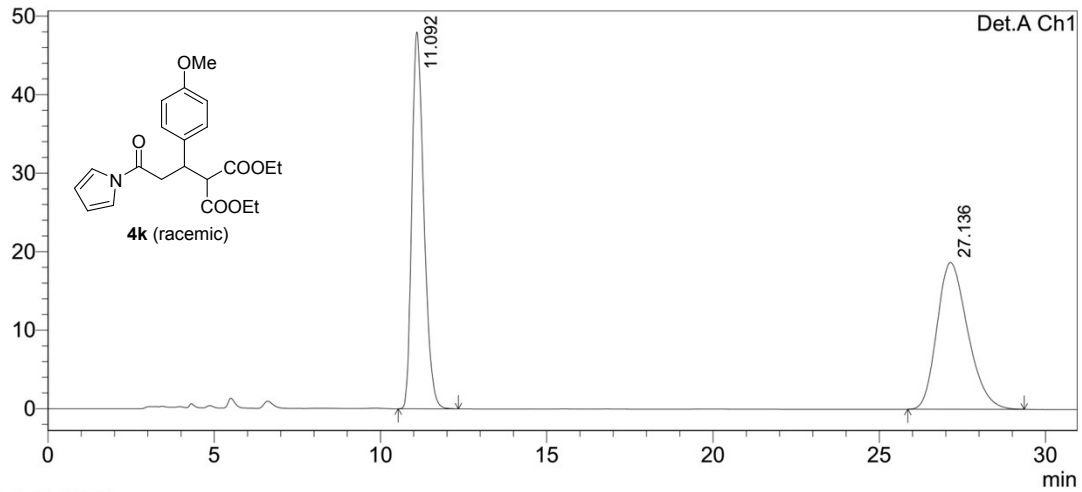

st.A Ch1/254nm

PeakTable

Detector A Ch1 254nm

| Peak# | Ret. Time | Area    | Height | Area %  | Height % |
|-------|-----------|---------|--------|---------|----------|
| 1     | 11.092    | 1206290 | 47987  | 50.032  | 71.964   |
| 2     | 27.136    | 1204724 | 18695  | 49.968  | 28.036   |
| Total |           | 2411014 | 66682  | 100.000 | 100.000  |

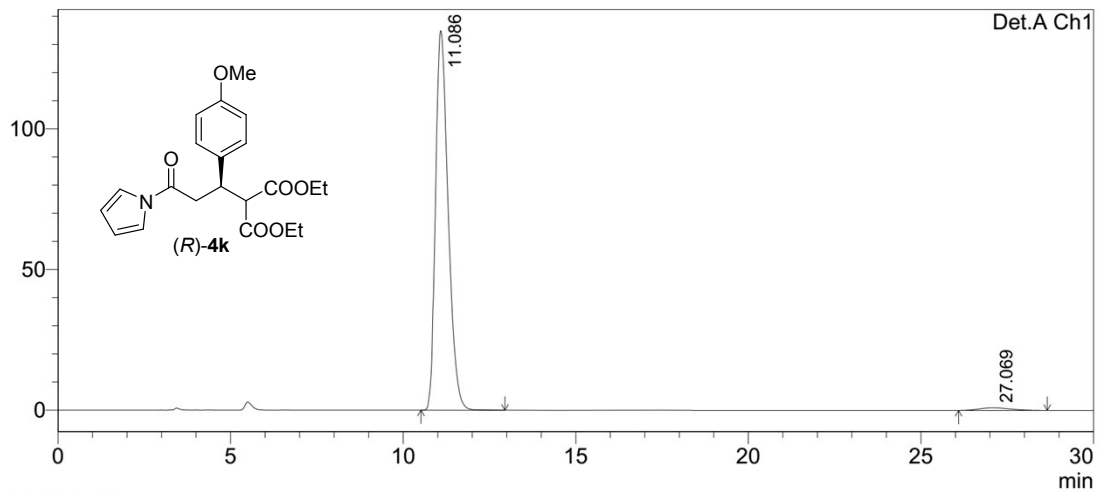

st.A Ch1/254nm

PeakTable

Detector A Ch1 254nm

| Peak# | Ret. Time | Area    | Height | Area %  | Height % |
|-------|-----------|---------|--------|---------|----------|
| 1     | 11.086    | 3430238 | 134864 | 98.345  | 99.324   |
| 2     | 27.069    | 57717   | 918    | 1.655   | 0.676    |
| Total |           | 3487956 | 135782 | 100.000 | 100.000  |

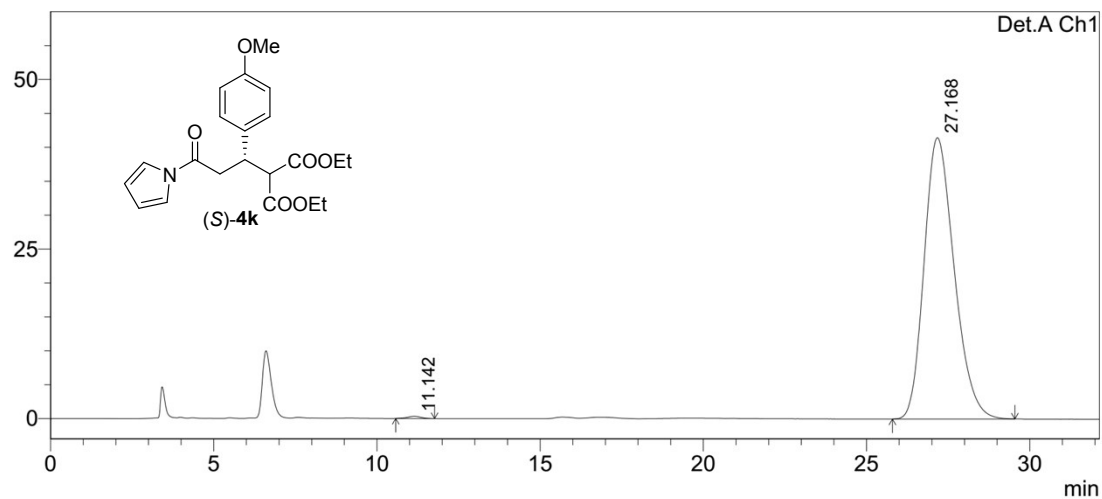

.A Ch1/254nm

PeakTable

Detector A Ch1 254nm

| Peak# | Ret. Time | Area    | Height | Area %  | Height % |
|-------|-----------|---------|--------|---------|----------|
| 1     | 11.142    | 9866    | 340    | 0.369   | 0.813    |
| 2     | 27.168    | 2660970 | 41484  | 99.631  | 99.187   |
| Total |           | 2670836 | 41825  | 100.000 | 100.000  |

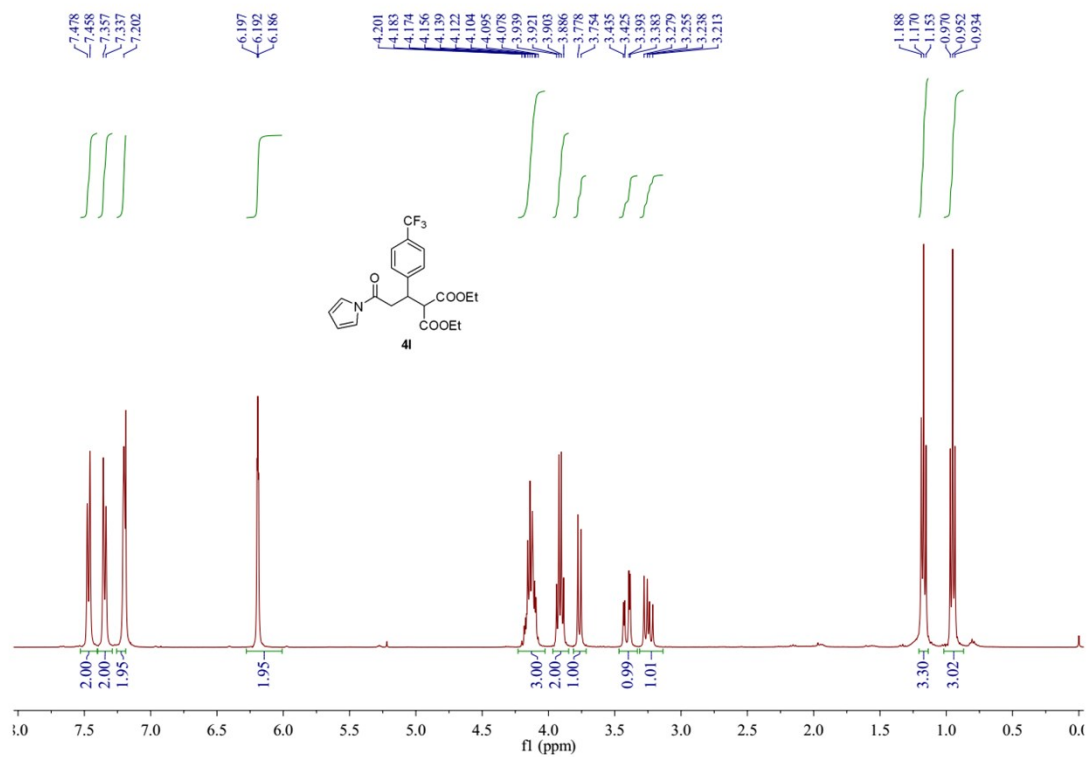

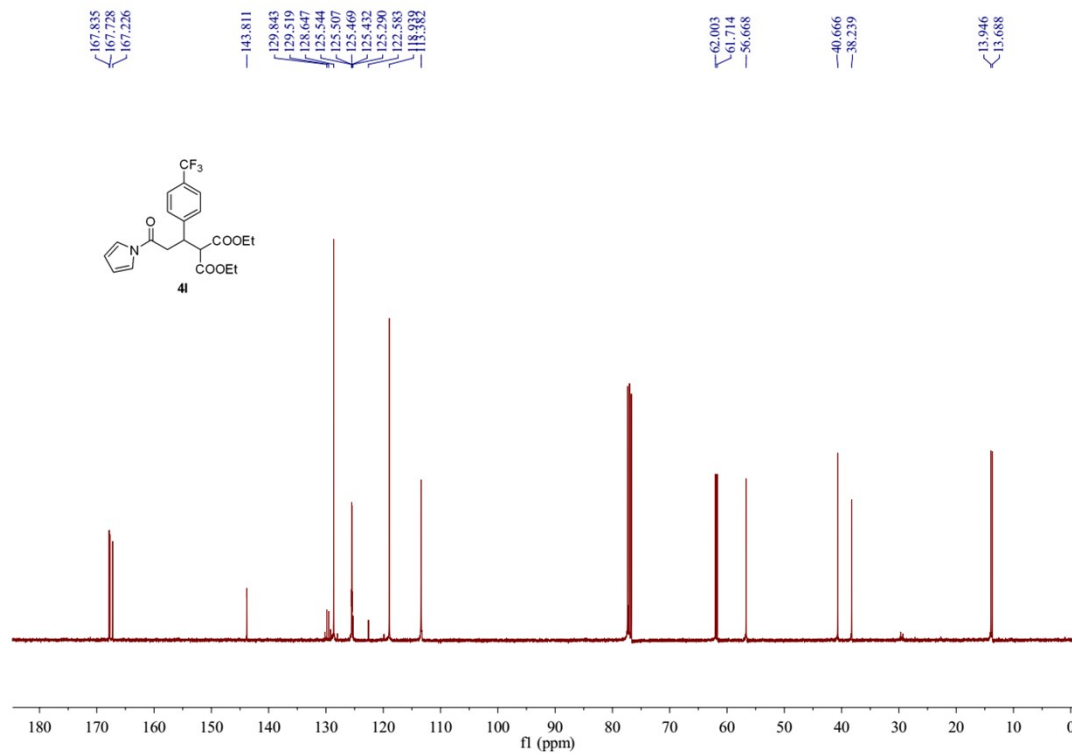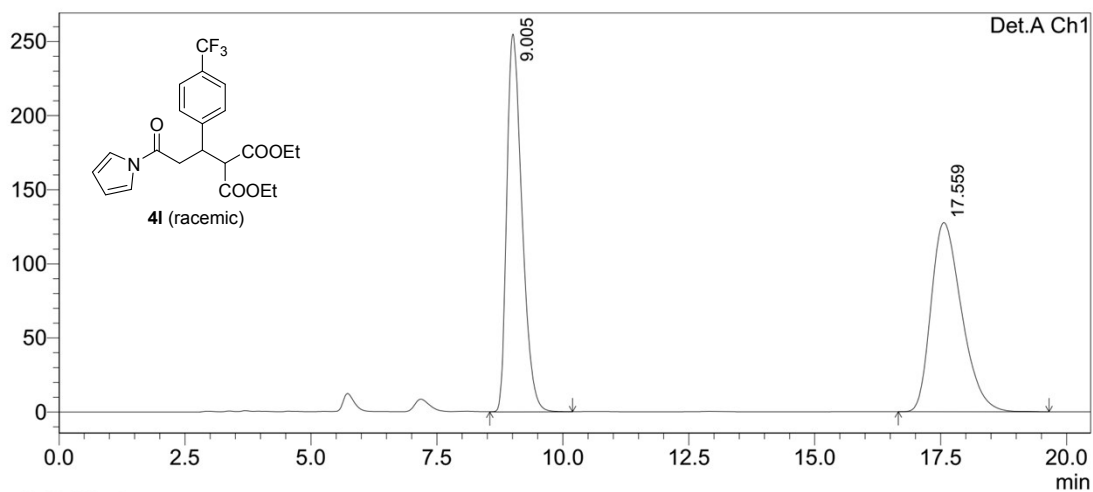

at.A Ch1/254nm

PeakTable

Detector A Ch1 254nm

| Peak# | Ret. Time | Area     | Height | Area %  | Height % |
|-------|-----------|----------|--------|---------|----------|
| 1     | 9.005     | 5363851  | 254902 | 49.839  | 66.634   |
| 2     | 17.559    | 5398407  | 127641 | 50.161  | 33.366   |
| Total |           | 10762258 | 382543 | 100.000 | 100.000  |

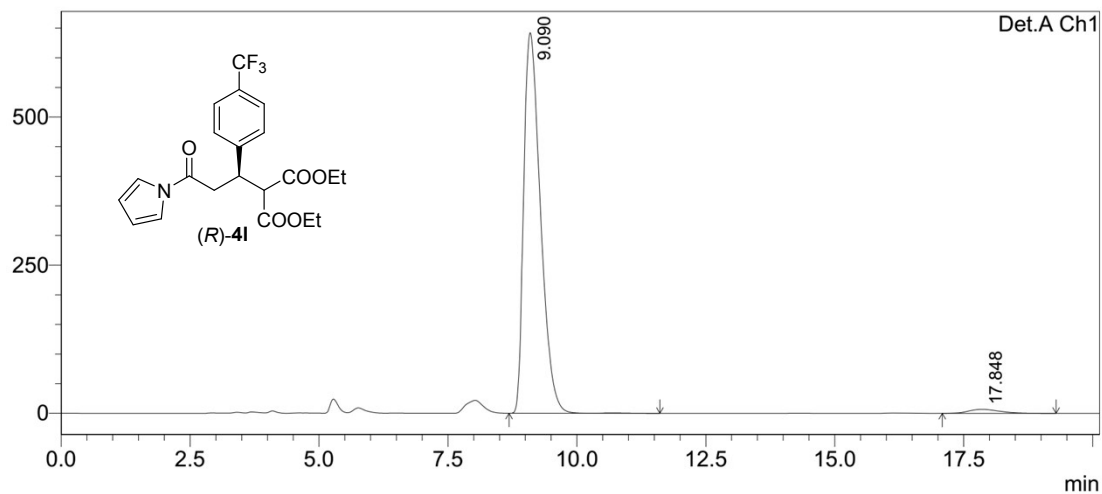

t.A Ch1/254nm

PeakTable

Detector A Ch1 254nm

| Peak# | Ret. Time | Area     | Height | Area %  | Height % |
|-------|-----------|----------|--------|---------|----------|
| 1     | 9.090     | 14508361 | 642347 | 98.102  | 98.963   |
| 2     | 17.848    | 280752   | 6734   | 1.898   | 1.037    |
| Total |           | 14789113 | 649081 | 100.000 | 100.000  |

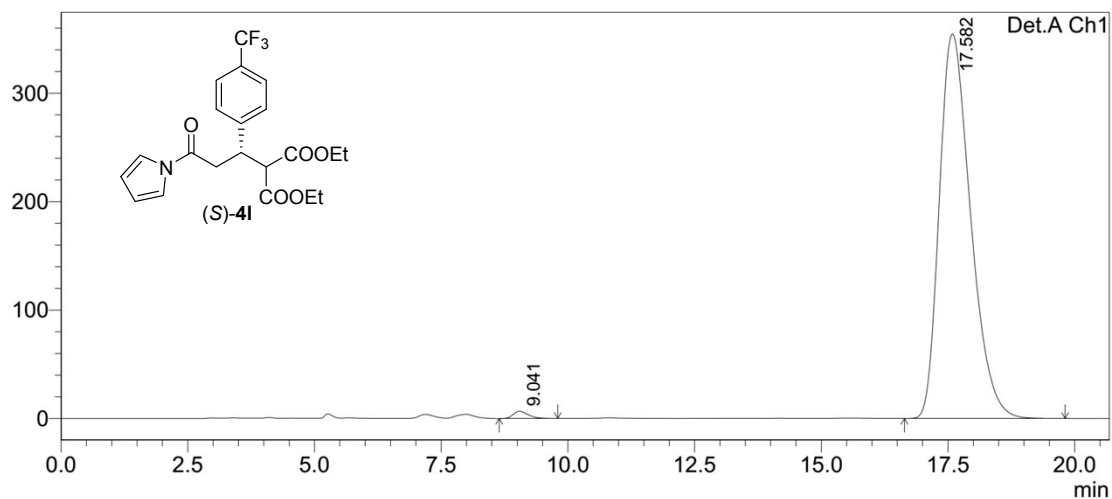

t.A Ch1/254nm

PeakTable

Detector A Ch1 254nm

| Peak# | Ret. Time | Area     | Height | Area %  | Height % |
|-------|-----------|----------|--------|---------|----------|
| 1     | 9.041     | 134064   | 6569   | 0.875   | 1.819    |
| 2     | 17.582    | 15184545 | 354614 | 99.125  | 98.181   |
| Total |           | 15318609 | 361183 | 100.000 | 100.000  |

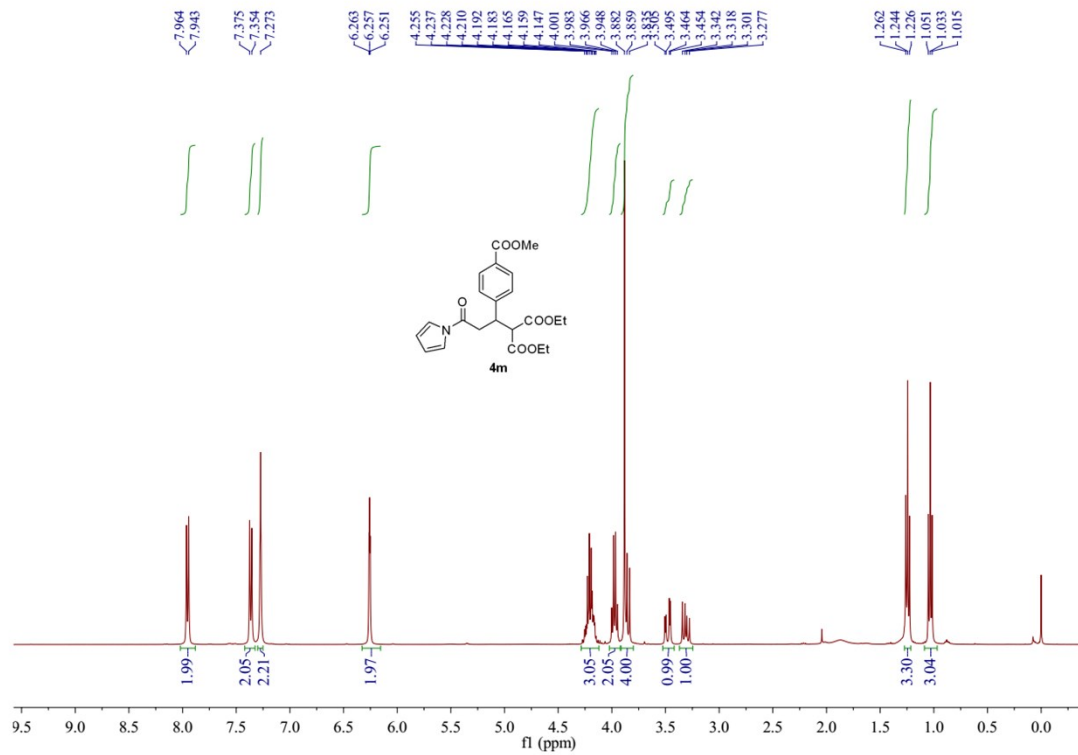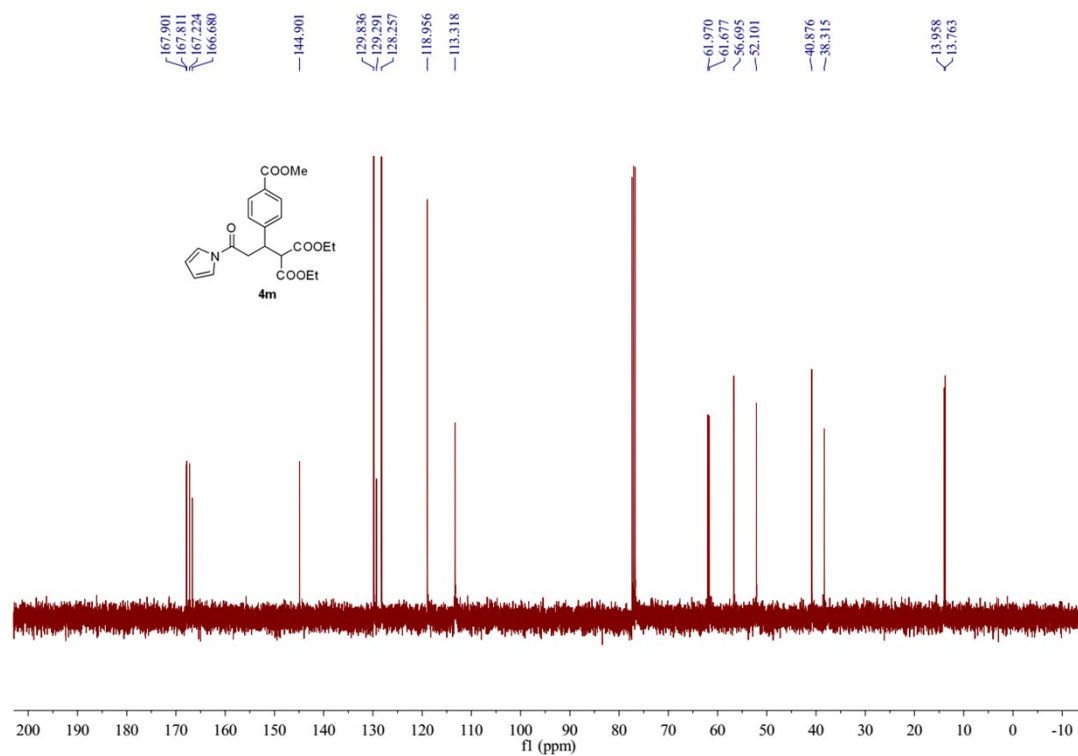

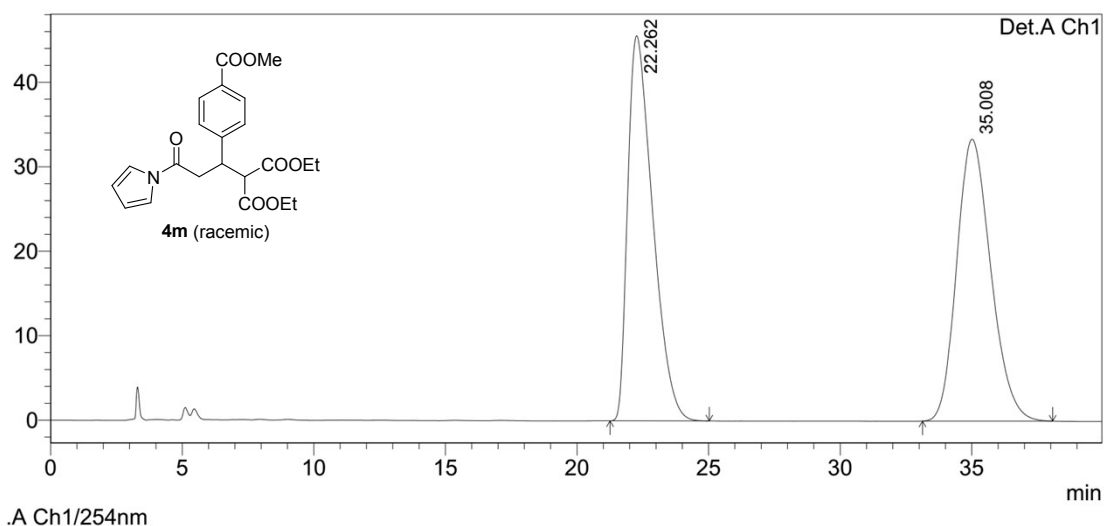

.A Ch1/254nm

PeakTable

Detector A Ch1 254nm

| Peak# | Ret. Time | Area    | Height | Area %  | Height % |
|-------|-----------|---------|--------|---------|----------|
| 1     | 22.262    | 3009357 | 45583  | 49.999  | 57.745   |
| 2     | 35.008    | 3009519 | 33355  | 50.001  | 42.255   |
| Total |           | 6018876 | 78938  | 100.000 | 100.000  |

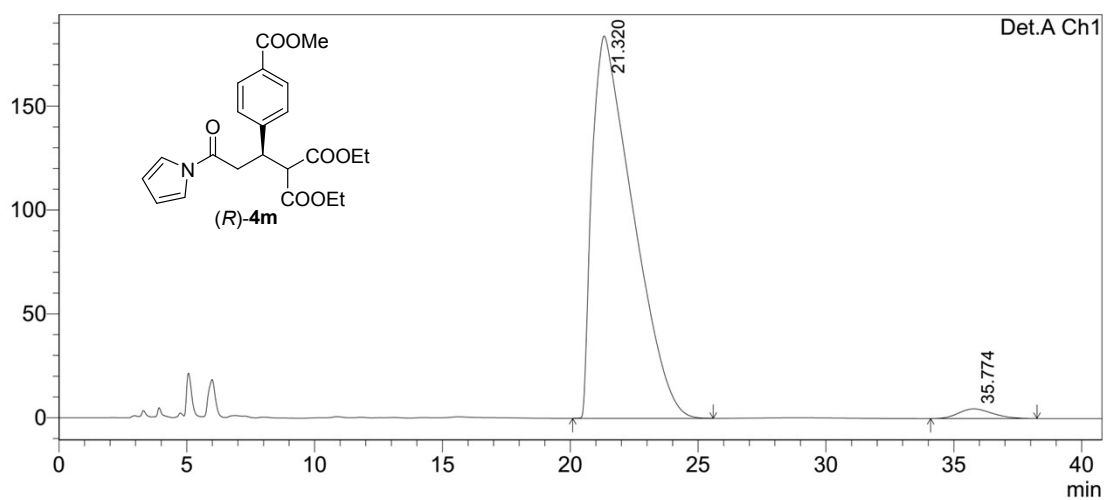

t.A Ch1/254nm

PeakTable

Detector A Ch1 254nm

| Peak# | Ret. Time | Area     | Height | Area %  | Height % |
|-------|-----------|----------|--------|---------|----------|
| 1     | 21.320    | 20392234 | 184032 | 97.938  | 97.529   |
| 2     | 35.774    | 429277   | 4663   | 2.062   | 2.471    |
| Total |           | 20821512 | 188696 | 100.000 | 100.000  |



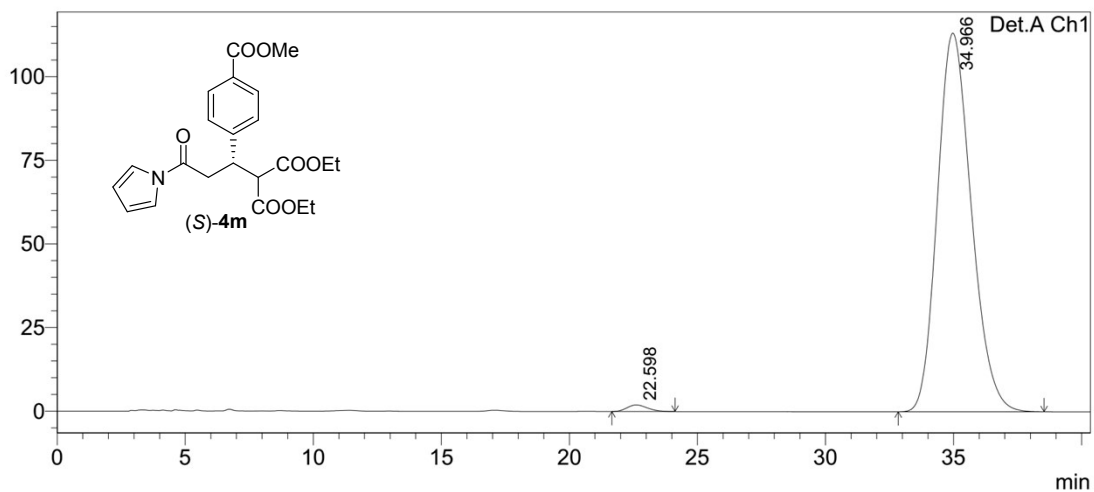

at.A Ch1/254nm

PeakTable

Detector A Ch1 254nm

| Peak# | Ret. Time | Area     | Height | Area %  | Height % |
|-------|-----------|----------|--------|---------|----------|
| 1     | 22.598    | 108392   | 1953   | 1.028   | 1.696    |
| 2     | 34.966    | 10437956 | 113207 | 98.972  | 98.304   |
| Total |           | 10546348 | 115160 | 100.000 | 100.000  |

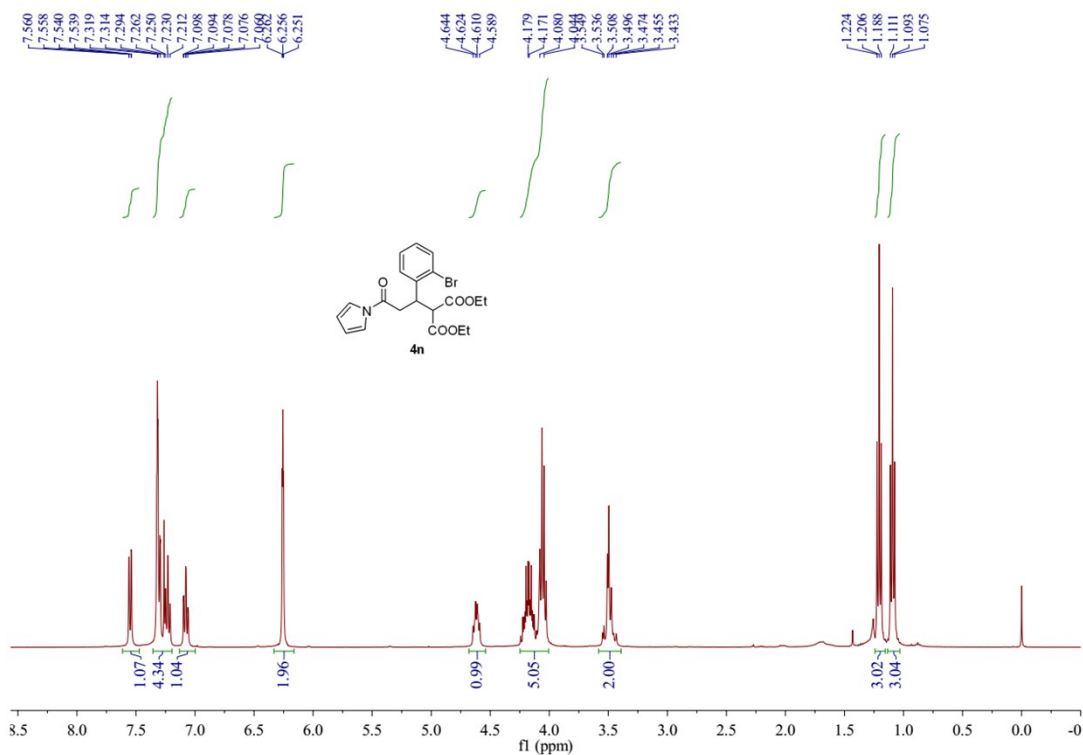

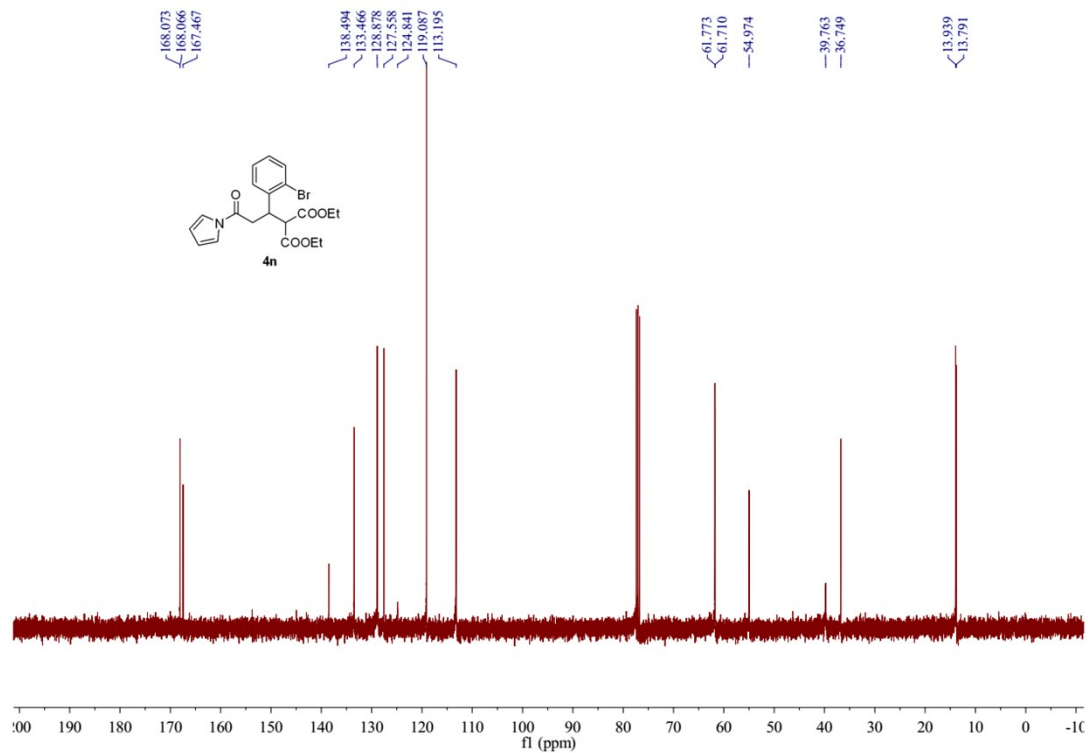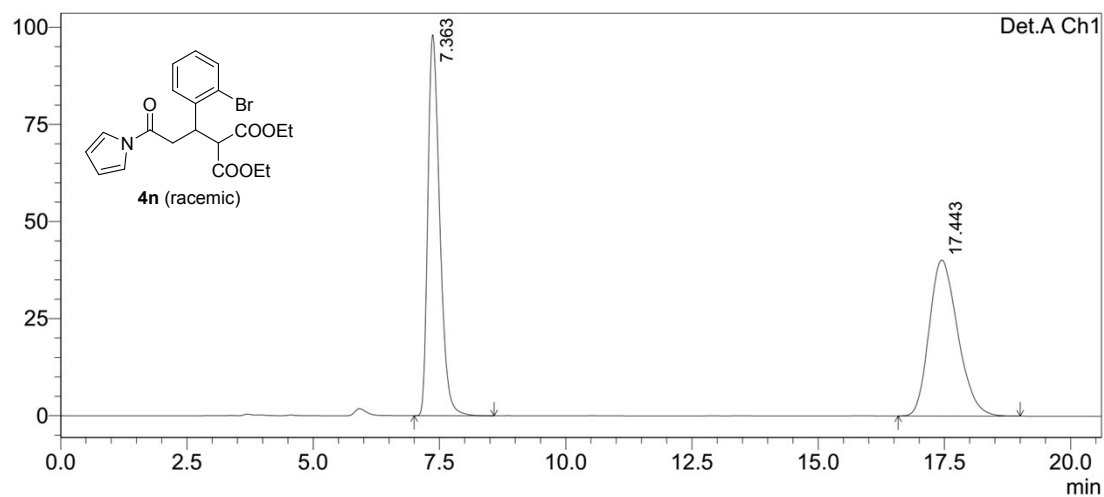

t.A Ch1/254nm

PeakTable

Detector A Ch1 254nm

| Peak# | Ret. Time | Area    | Height | Area %  | Height % |
|-------|-----------|---------|--------|---------|----------|
| 1     | 7.363     | 1605933 | 98124  | 50.338  | 70.947   |
| 2     | 17.443    | 1584394 | 40183  | 49.662  | 29.053   |
| Total |           | 3190327 | 138307 | 100.000 | 100.000  |

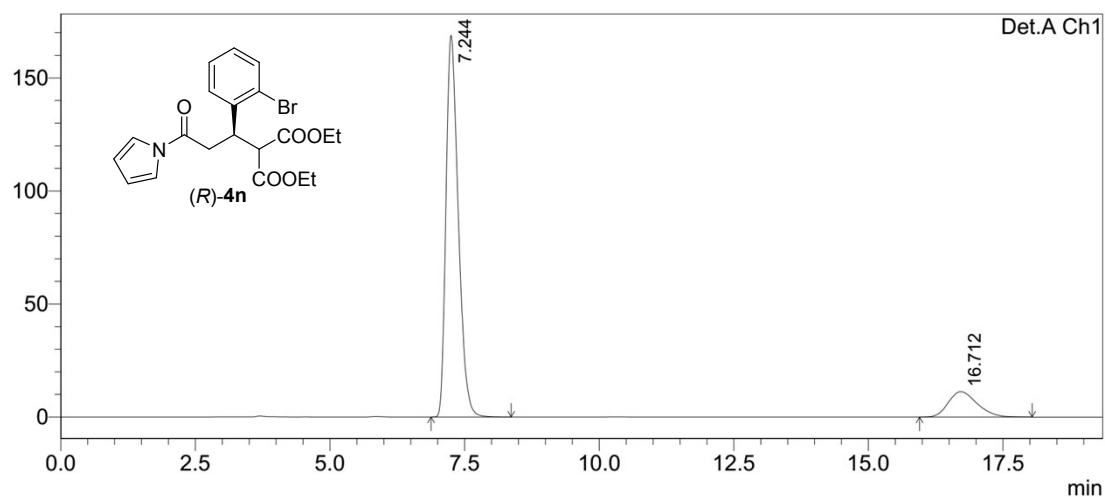

t.A Ch1/254nm

PeakTable

Detector A Ch1 254nm

| Peak# | Ret. Time | Area    | Height | Area %  | Height % |
|-------|-----------|---------|--------|---------|----------|
| 1     | 7.244     | 2681275 | 168851 | 86.481  | 93.750   |
| 2     | 16.712    | 419161  | 11257  | 13.519  | 6.250    |
| Total |           | 3100435 | 180108 | 100.000 | 100.000  |

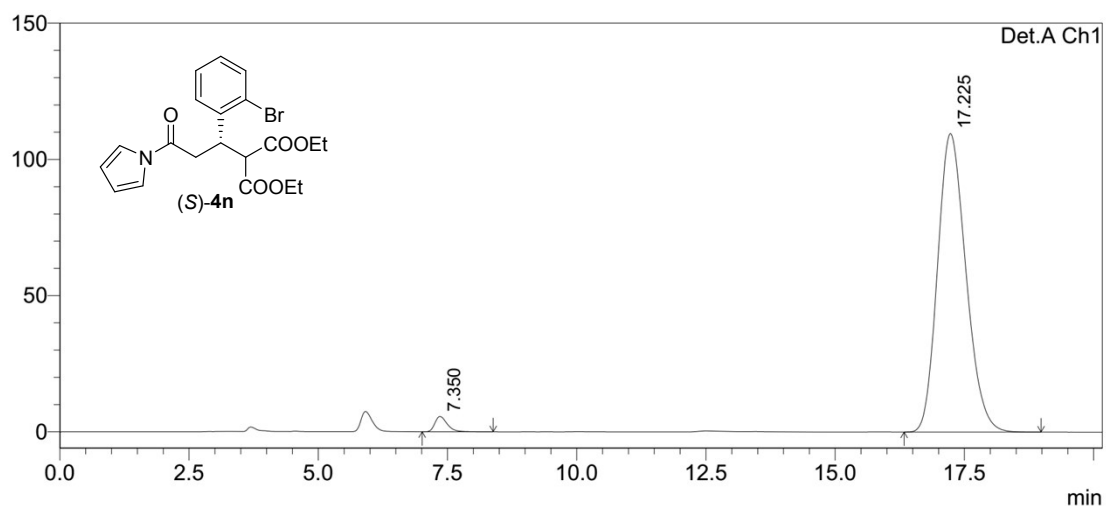

t.A Ch1/254nm

PeakTable

Detector A Ch1 254nm

| Peak# | Ret. Time | Area    | Height | Area %  | Height % |
|-------|-----------|---------|--------|---------|----------|
| 1     | 7.350     | 93263   | 5620   | 2.184   | 4.880    |
| 2     | 17.225    | 4176835 | 109548 | 97.816  | 95.120   |
| Total |           | 4270098 | 115167 | 100.000 | 100.000  |

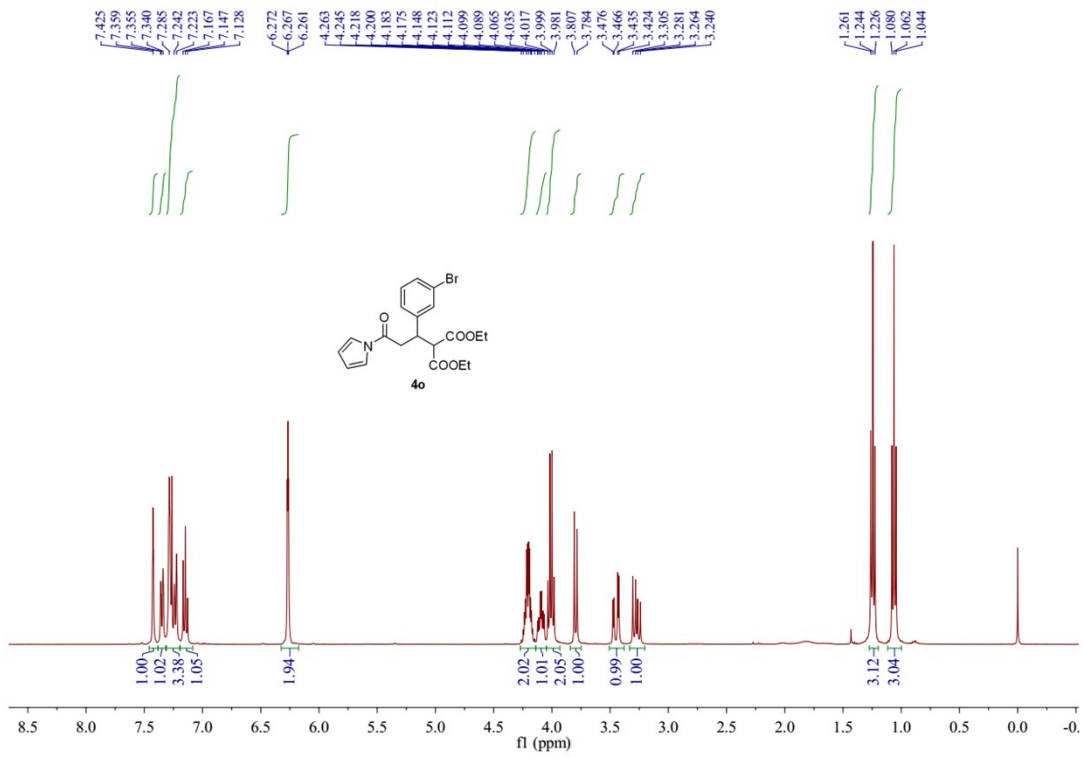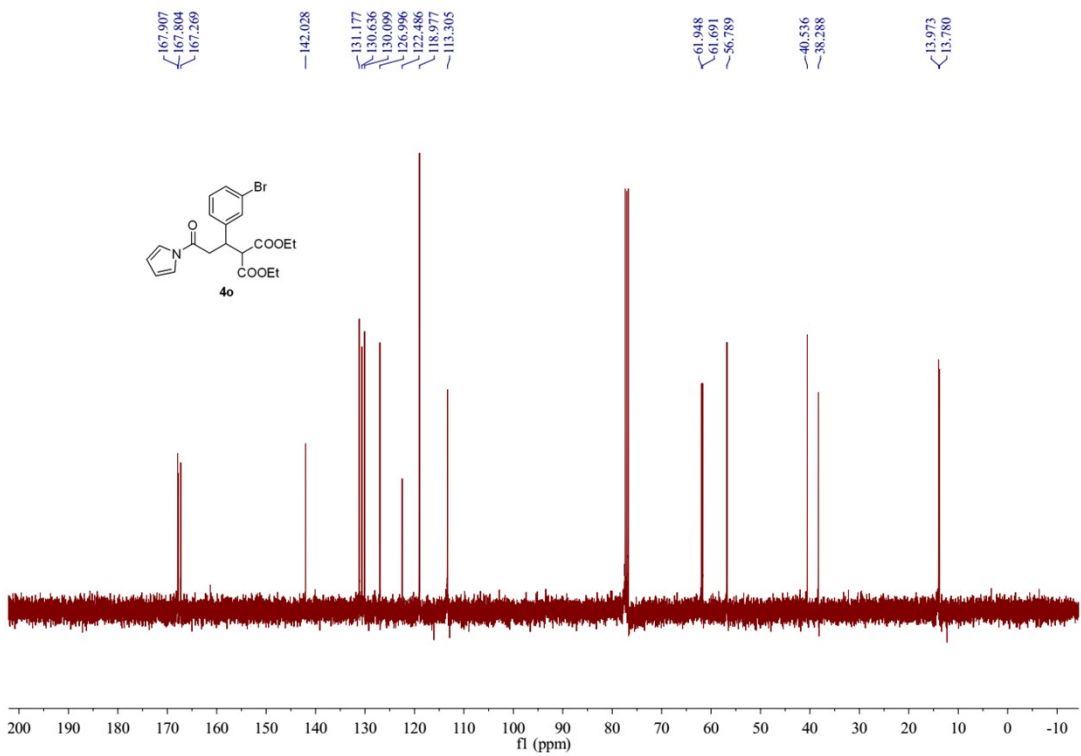

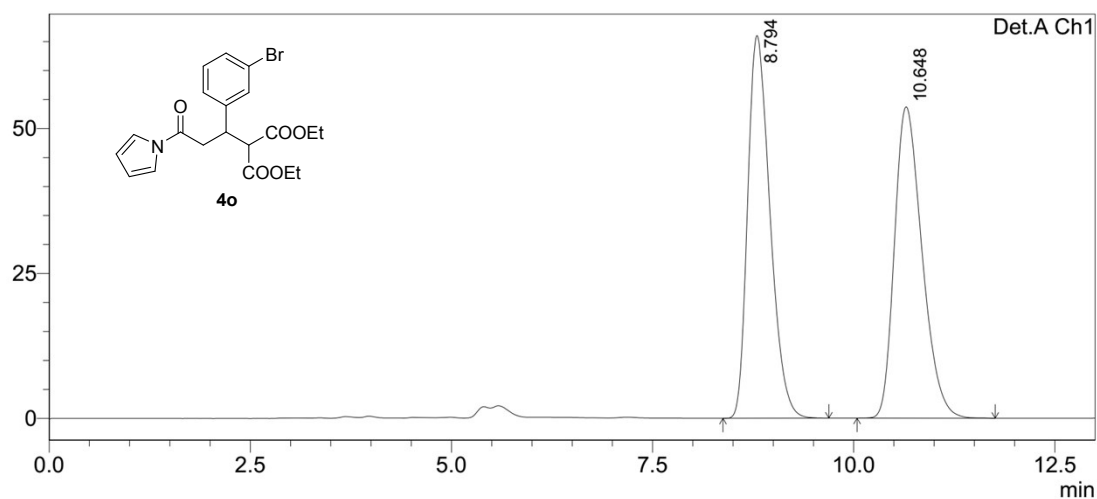

.A Ch1/254nm

PeakTable

Detector A Ch1 254nm

| Peak# | Ret. Time | Area    | Height | Area %  | Height % |
|-------|-----------|---------|--------|---------|----------|
| 1     | 8.794     | 1276672 | 66017  | 49.954  | 55.145   |
| 2     | 10.648    | 1279033 | 53698  | 50.046  | 44.855   |
| Total |           | 2555705 | 119715 | 100.000 | 100.000  |

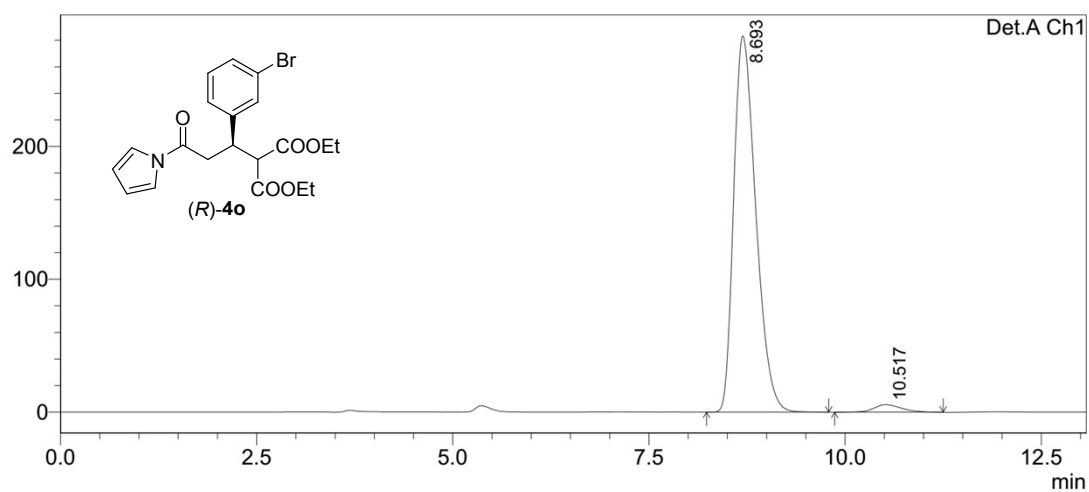

it.A Ch1/254nm

PeakTable

Detector A Ch1 254nm

| Peak# | Ret. Time | Area    | Height | Area %  | Height % |
|-------|-----------|---------|--------|---------|----------|
| 1     | 8.693     | 5545028 | 283249 | 97.668  | 98.061   |
| 2     | 10.517    | 132423  | 5600   | 2.332   | 1.939    |
| Total |           | 5677450 | 288849 | 100.000 | 100.000  |

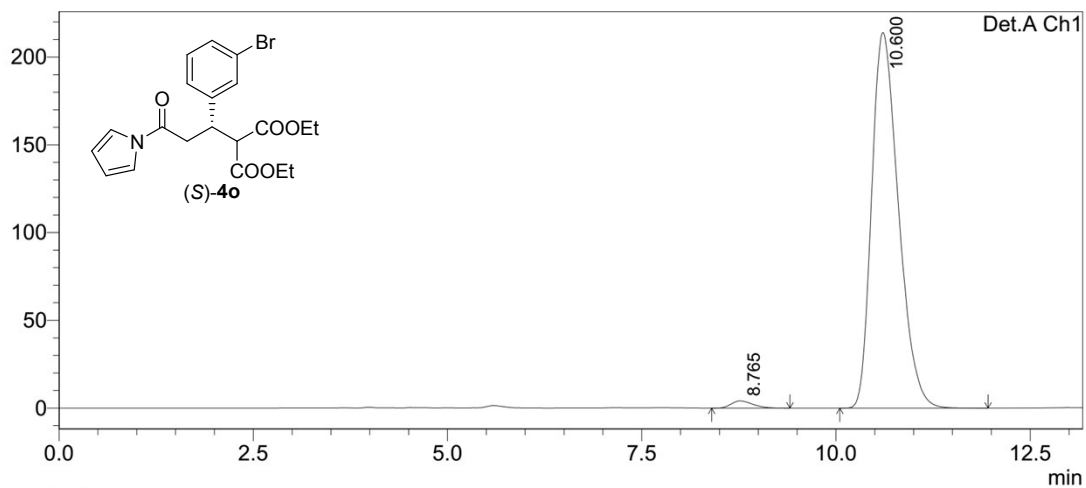

PeakTable

Detector A Ch1 254nm

| Peak# | Ret. Time | Area    | Height | Area %  | Height % |
|-------|-----------|---------|--------|---------|----------|
| 1     | 8.765     | 78368   | 4098   | 1.502   | 1.879    |
| 2     | 10.600    | 5138628 | 213964 | 98.498  | 98.121   |
| Total |           | 5216996 | 218062 | 100.000 | 100.000  |

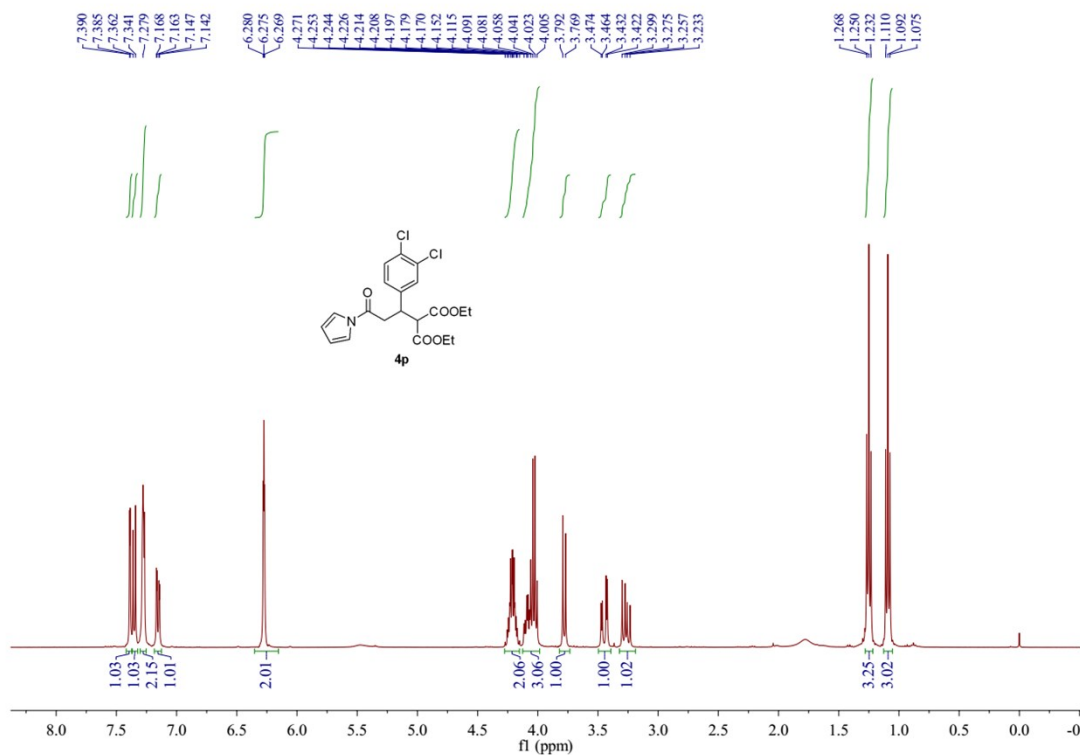

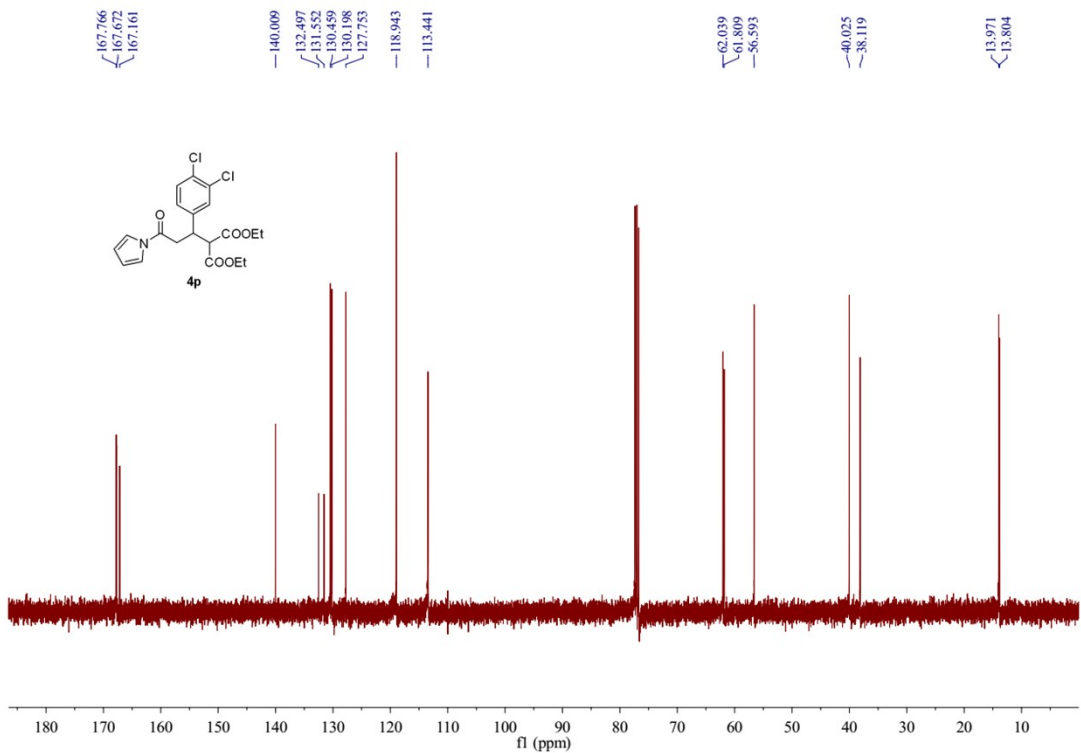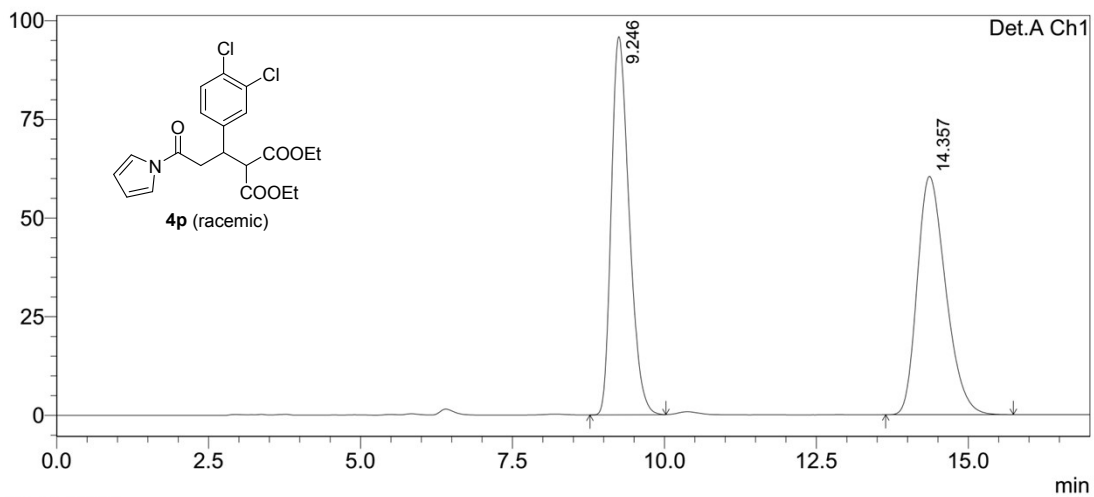

Det. A Ch1/254nm

PeakTable

Detector A Ch1 254nm

| Peak# | Ret. Time | Area    | Height | Area %  | Height % |
|-------|-----------|---------|--------|---------|----------|
| 1     | 9.246     | 1959133 | 95883  | 49.908  | 61.358   |
| 2     | 14.357    | 1966338 | 60385  | 50.092  | 38.642   |
| Total |           | 3925471 | 156267 | 100.000 | 100.000  |

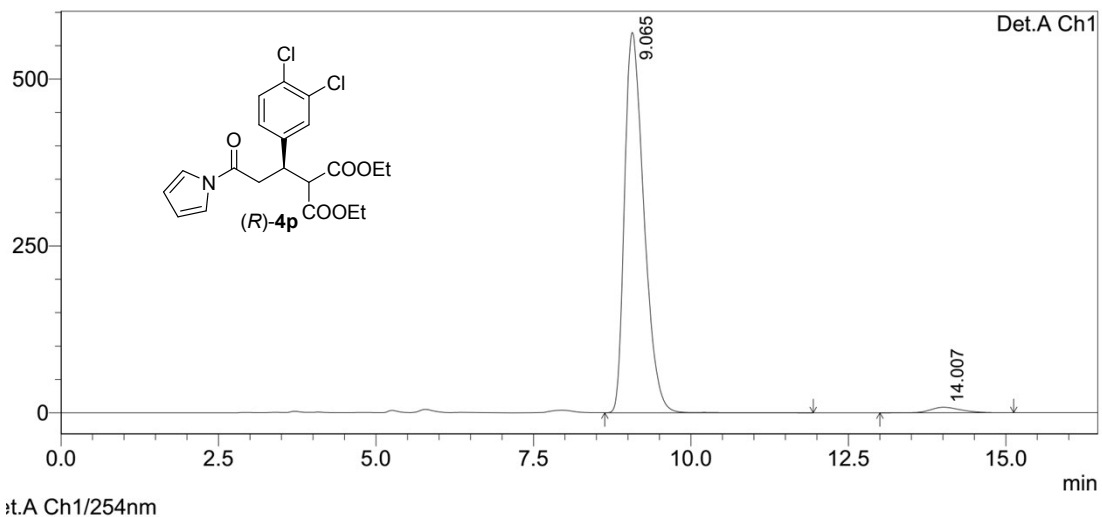

PeakTable

Detector A Ch1 254nm

| Peak# | Ret. Time | Area     | Height | Area %  | Height % |
|-------|-----------|----------|--------|---------|----------|
| 1     | 9.065     | 12194936 | 569798 | 97.802  | 98.573   |
| 2     | 14.007    | 274068   | 8248   | 2.198   | 1.427    |
| Total |           | 12469004 | 578046 | 100.000 | 100.000  |

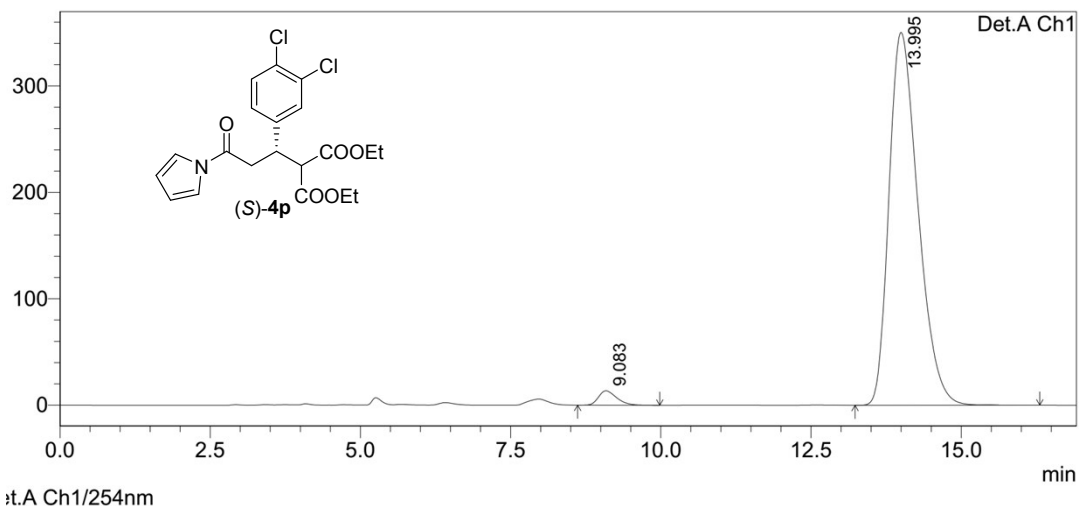

PeakTable

Detector A Ch1 254nm

| Peak# | Ret. Time | Area     | Height | Area %  | Height % |
|-------|-----------|----------|--------|---------|----------|
| 1     | 9.083     | 281349   | 13486  | 2.332   | 3.706    |
| 2     | 13.995    | 11782398 | 350370 | 97.668  | 96.294   |
| Total |           | 12063748 | 363856 | 100.000 | 100.000  |



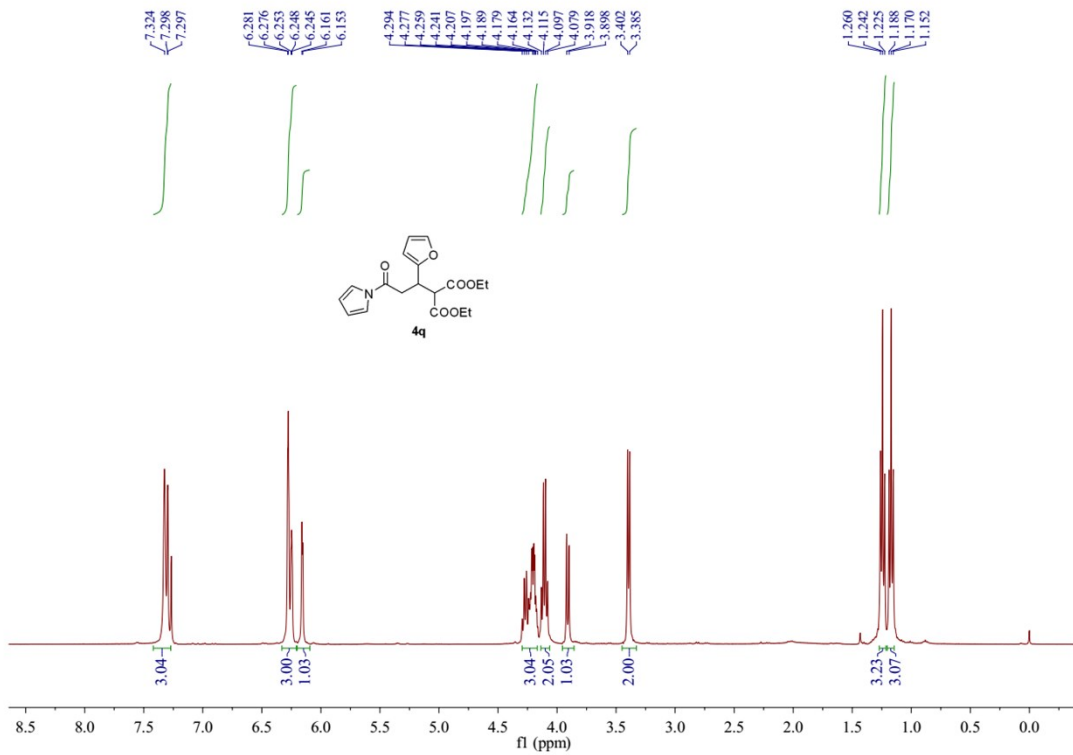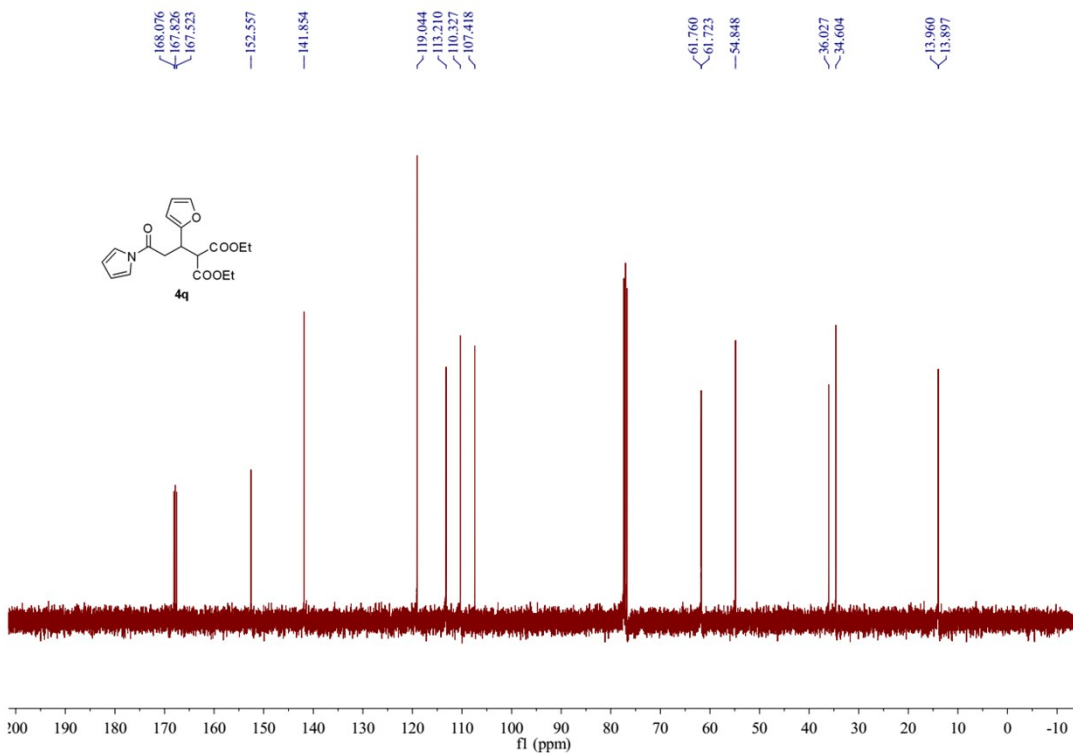

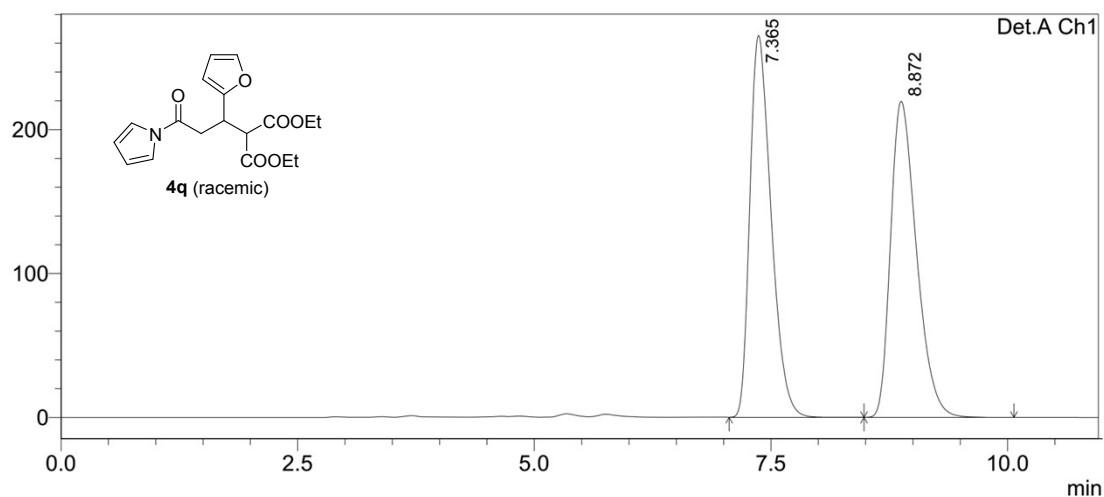

st.A Ch1/254nm

PeakTable

Detector A Ch1 254nm

| Peak# | Ret. Time | Area    | Height | Area %  | Height % |
|-------|-----------|---------|--------|---------|----------|
| 1     | 7.365     | 4150090 | 265446 | 49.799  | 54.711   |
| 2     | 8.872     | 4183615 | 219728 | 50.201  | 45.289   |
| Total |           | 8333705 | 485174 | 100.000 | 100.000  |

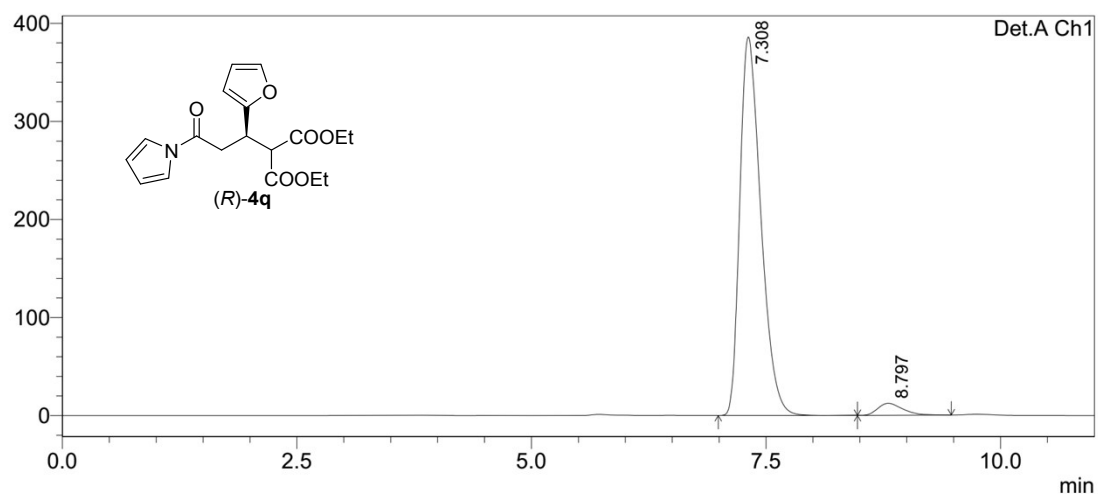

st.A Ch1/254nm

PeakTable

Detector A Ch1 254nm

| Peak# | Ret. Time | Area    | Height | Area %  | Height % |
|-------|-----------|---------|--------|---------|----------|
| 1     | 7.308     | 6010711 | 385930 | 96.345  | 96.921   |
| 2     | 8.797     | 228036  | 12262  | 3.655   | 3.079    |
| Total |           | 6238747 | 398192 | 100.000 | 100.000  |

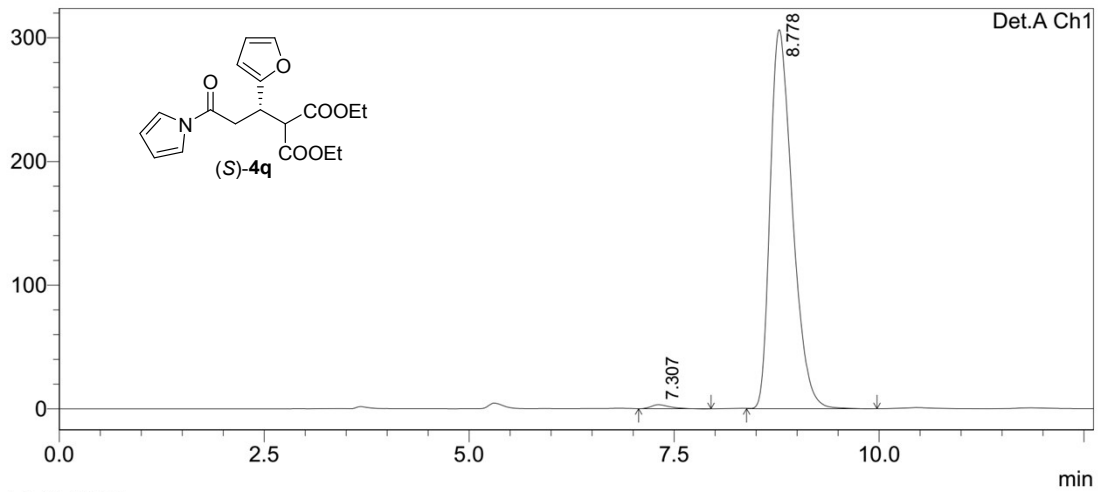

at.A Ch1/254nm

PeakTable

Detector A Ch1 254nm

| Peak# | Ret. Time | Area    | Height | Area %  | Height % |
|-------|-----------|---------|--------|---------|----------|
| 1     | 7.307     | 49536   | 3210   | 0.848   | 1.037    |
| 2     | 8.778     | 5789552 | 306463 | 99.152  | 98.963   |
| Total |           | 5839088 | 309673 | 100.000 | 100.000  |

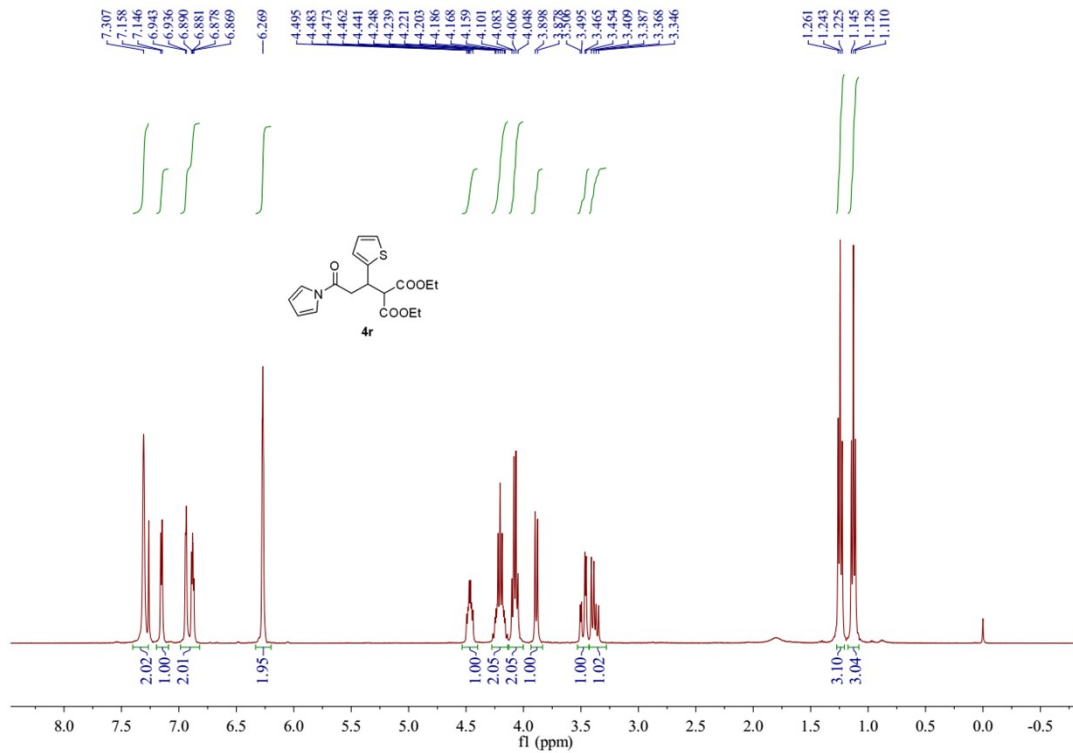

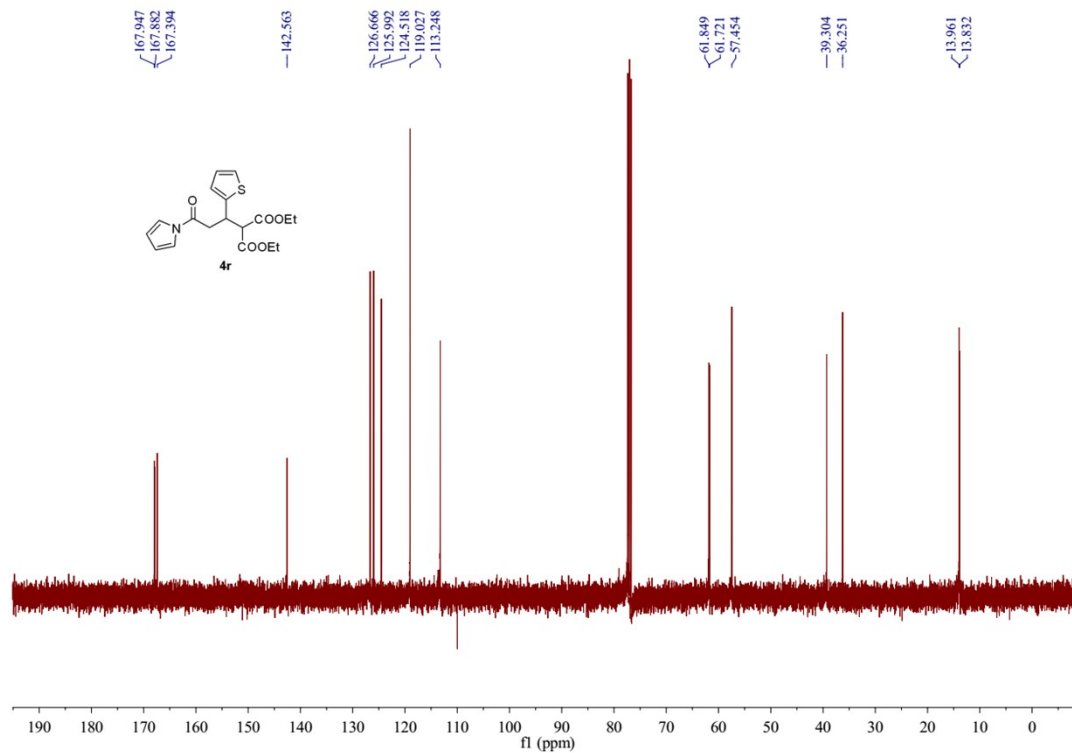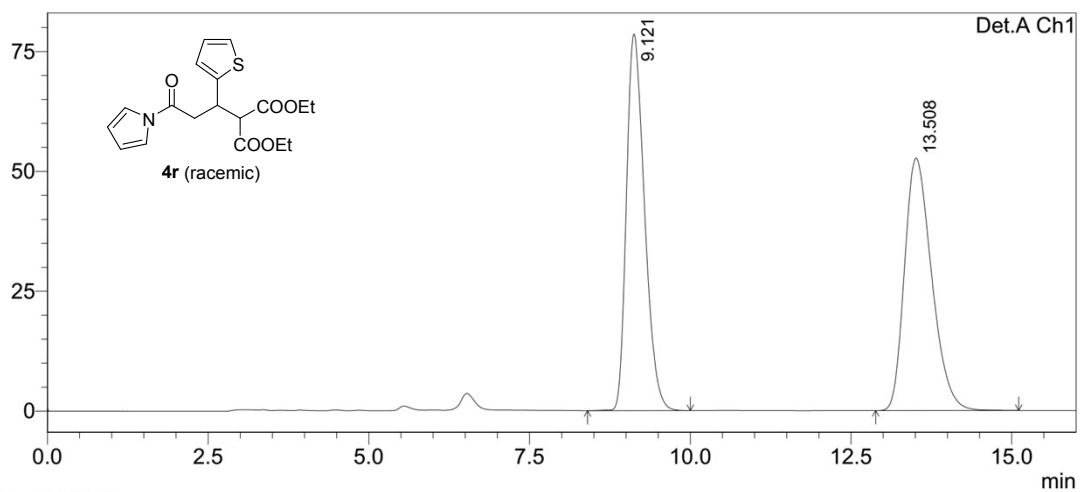

t.A Ch1/254nm

PeakTable

Detector A Ch1 254nm

| Peak# | Ret. Time | Area    | Height | Area %  | Height % |
|-------|-----------|---------|--------|---------|----------|
| 1     | 9.121     | 1539956 | 78554  | 49.851  | 59.869   |
| 2     | 13.508    | 1549156 | 52656  | 50.149  | 40.131   |
| Total |           | 3089112 | 131209 | 100.000 | 100.000  |

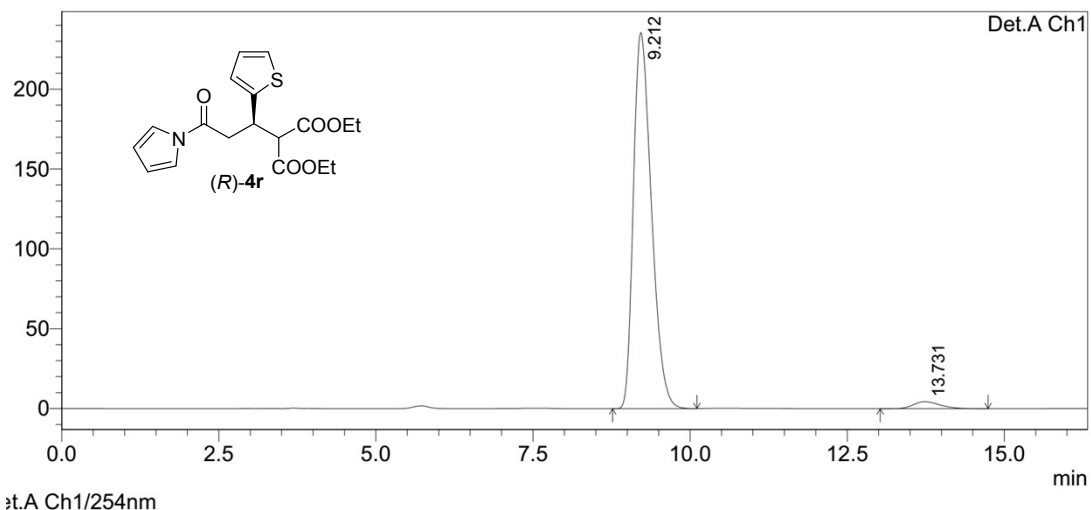

Det.A Ch1/254nm

PeakTable

Detector A Ch1 254nm

| Peak# | Ret. Time | Area    | Height | Area %  | Height % |
|-------|-----------|---------|--------|---------|----------|
| 1     | 9.212     | 4710976 | 235522 | 97.315  | 98.180   |
| 2     | 13.731    | 129986  | 4367   | 2.685   | 1.820    |
| Total |           | 4840962 | 239889 | 100.000 | 100.000  |

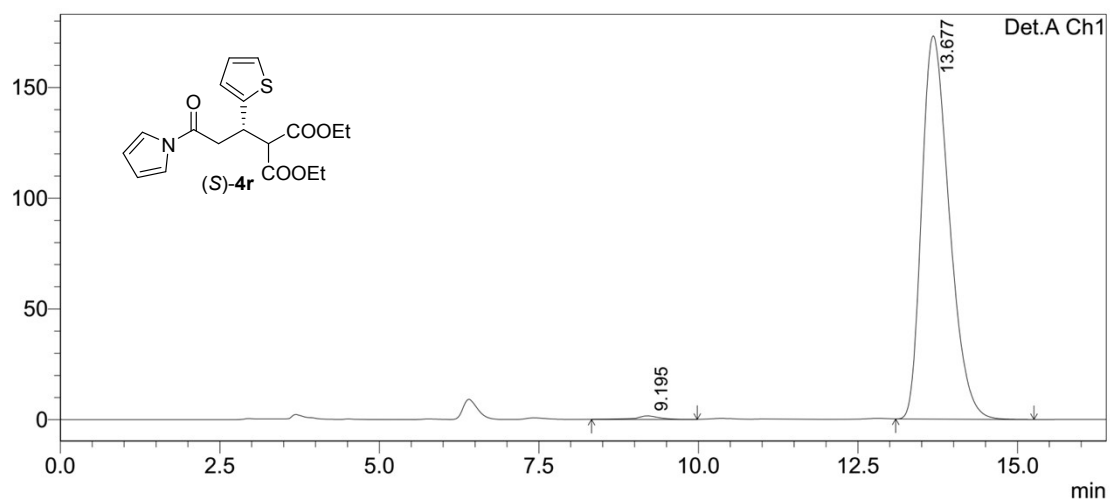

Det.A Ch1/254nm

PeakTable

Detector A Ch1 254nm

| Peak# | Ret. Time | Area    | Height | Area %  | Height % |
|-------|-----------|---------|--------|---------|----------|
| 1     | 9.195     | 39089   | 1574   | 0.745   | 0.902    |
| 2     | 13.677    | 5206564 | 173034 | 99.255  | 99.098   |
| Total |           | 5245653 | 174608 | 100.000 | 100.000  |

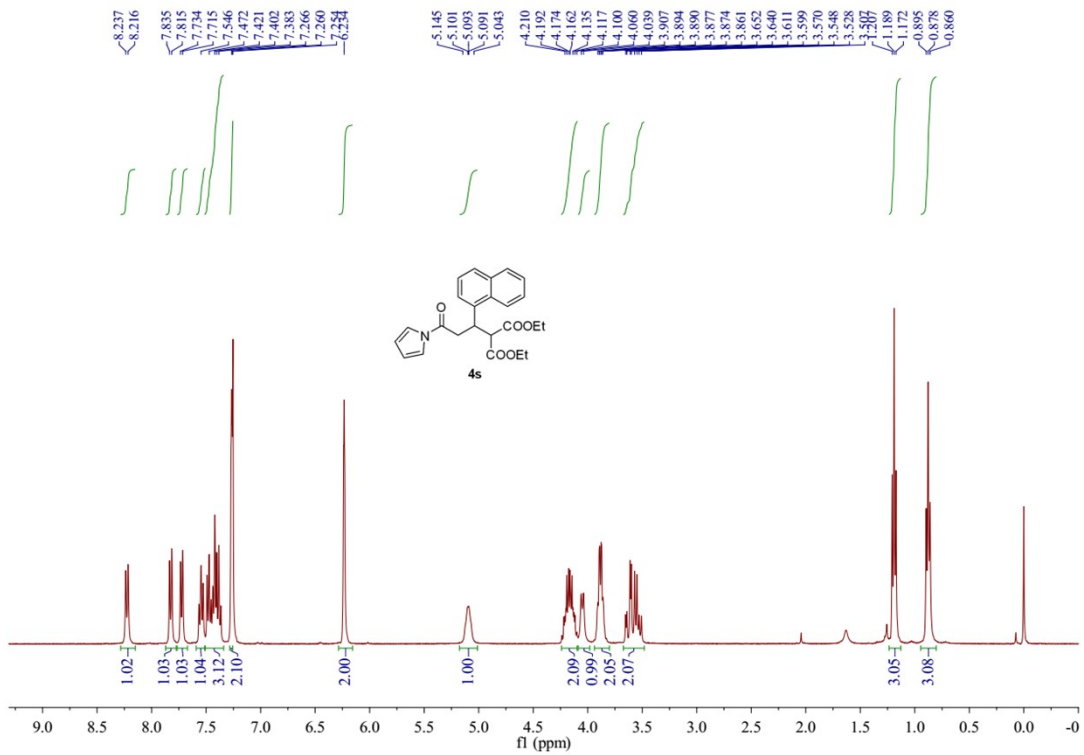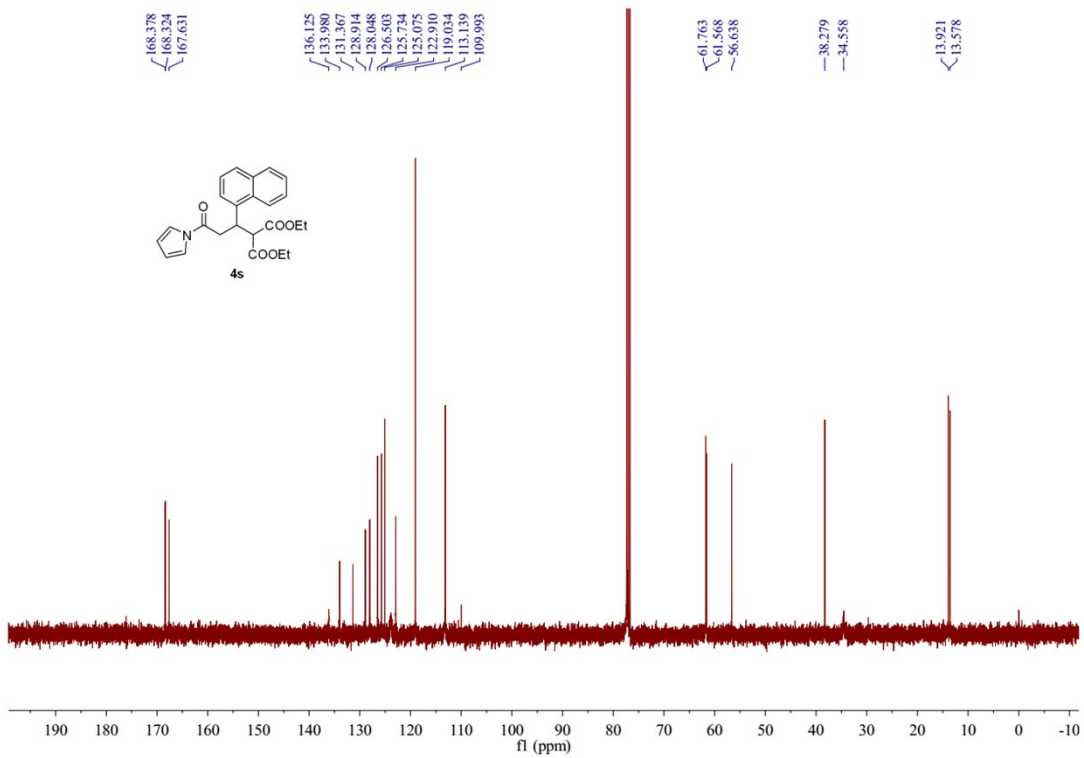

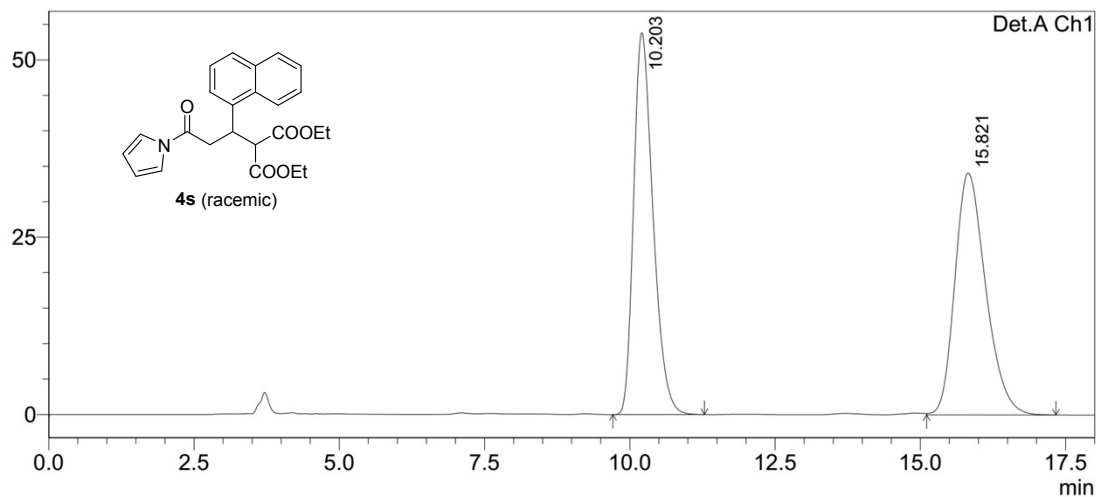

t.A Ch1/254nm

PeakTable

Detector A Ch1 254nm

| Peak# | Ret. Time | Area    | Height | Area %  | Height % |
|-------|-----------|---------|--------|---------|----------|
| 1     | 10.203    | 1251415 | 53848  | 49.830  | 61.206   |
| 2     | 15.821    | 1259958 | 34131  | 50.170  | 38.794   |
| Total |           | 2511373 | 87980  | 100.000 | 100.000  |

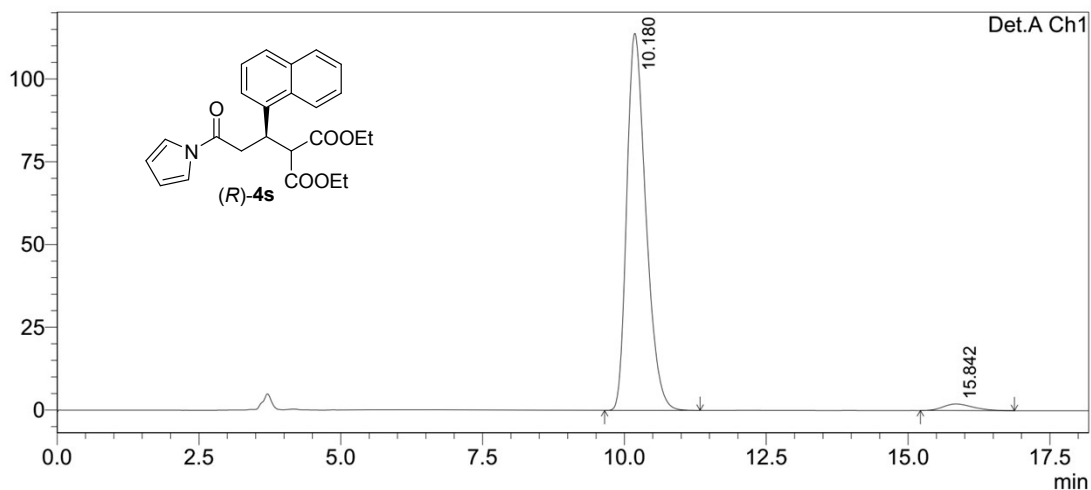

t.A Ch1/254nm

PeakTable

Detector A Ch1 254nm

| Peak# | Ret. Time | Area    | Height | Area %  | Height % |
|-------|-----------|---------|--------|---------|----------|
| 1     | 10.180    | 2669125 | 113900 | 97.364  | 98.278   |
| 2     | 15.842    | 72252   | 1995   | 2.636   | 1.722    |
| Total |           | 2741377 | 115896 | 100.000 | 100.000  |

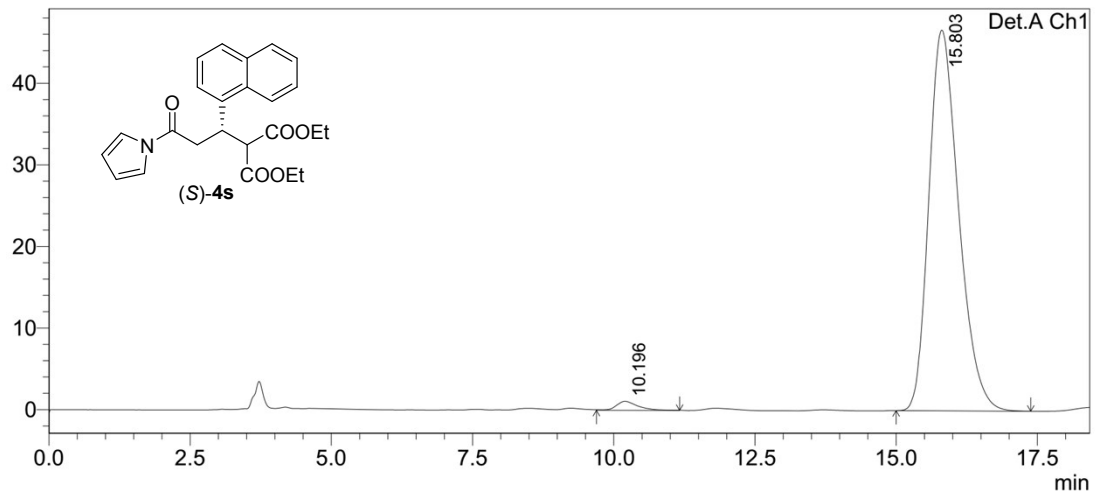

.A Ch1/254nm

PeakTable

Detector A Ch1 254nm

| Peak# | Ret. Time | Area    | Height | Area %  | Height % |
|-------|-----------|---------|--------|---------|----------|
| 1     | 10.196    | 29538   | 1109   | 1.693   | 2.321    |
| 2     | 15.803    | 1715658 | 46661  | 98.307  | 97.679   |
| Total |           | 1745195 | 47769  | 100.000 | 100.000  |

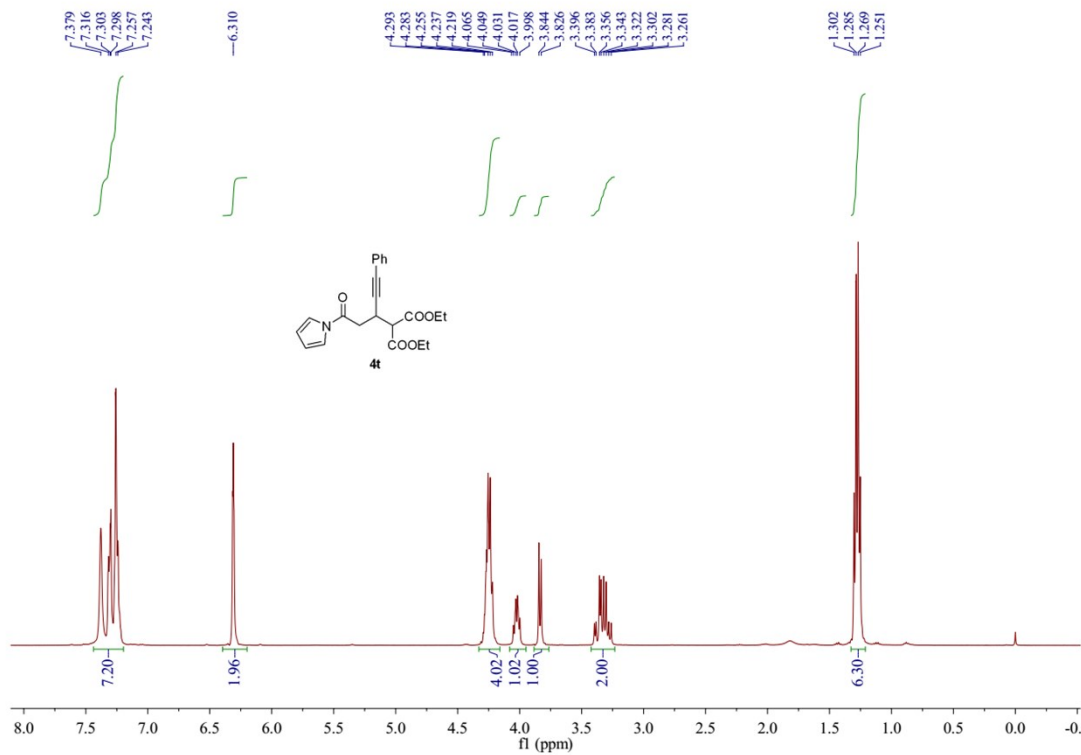



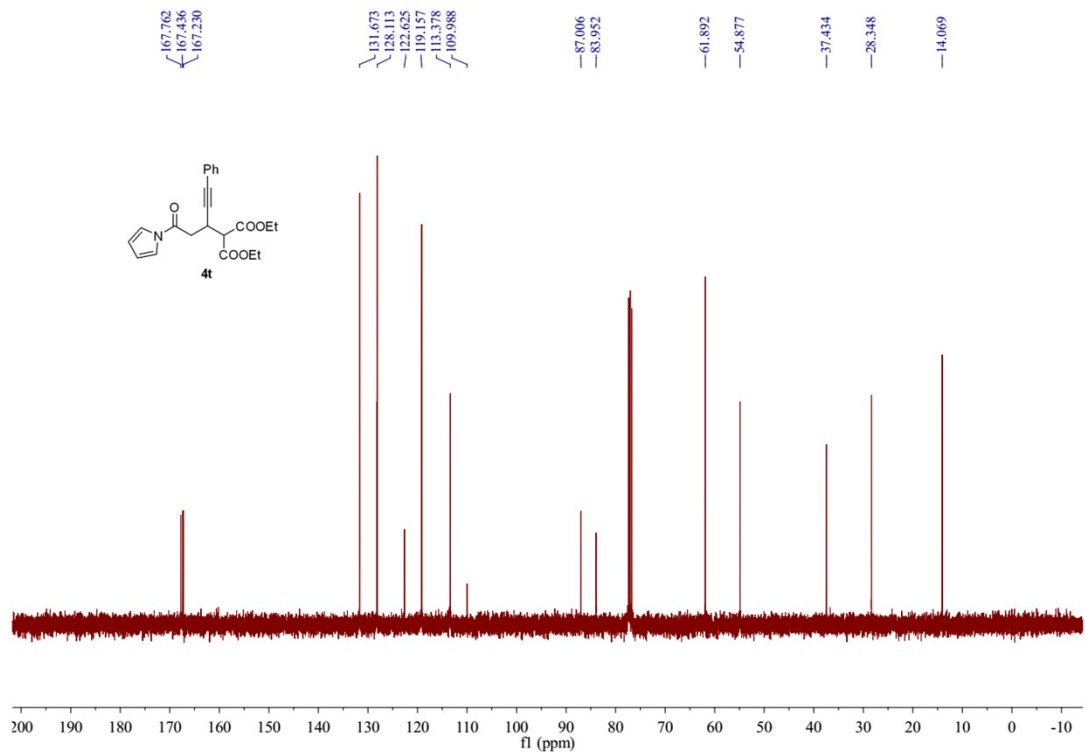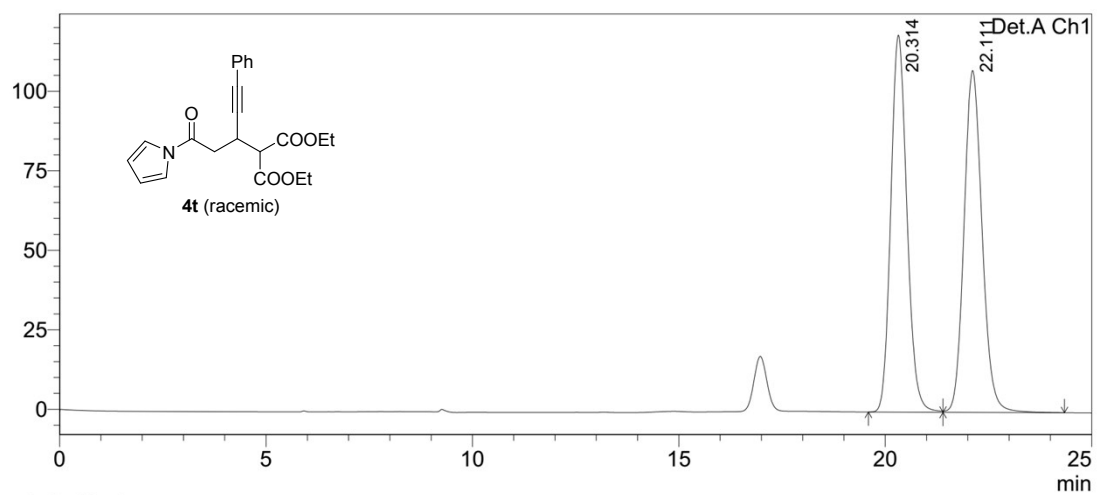

t.A Ch1/254nm

PeakTable

Detector A Ch1 254nm

| Peak# | Ret. Time | Area    | Height | Area %  | Height % |
|-------|-----------|---------|--------|---------|----------|
| 1     | 20.314    | 3215070 | 118552 | 49.490  | 52.439   |
| 2     | 22.111    | 3281296 | 107522 | 50.510  | 47.561   |
| Total |           | 6496366 | 226075 | 100.000 | 100.000  |

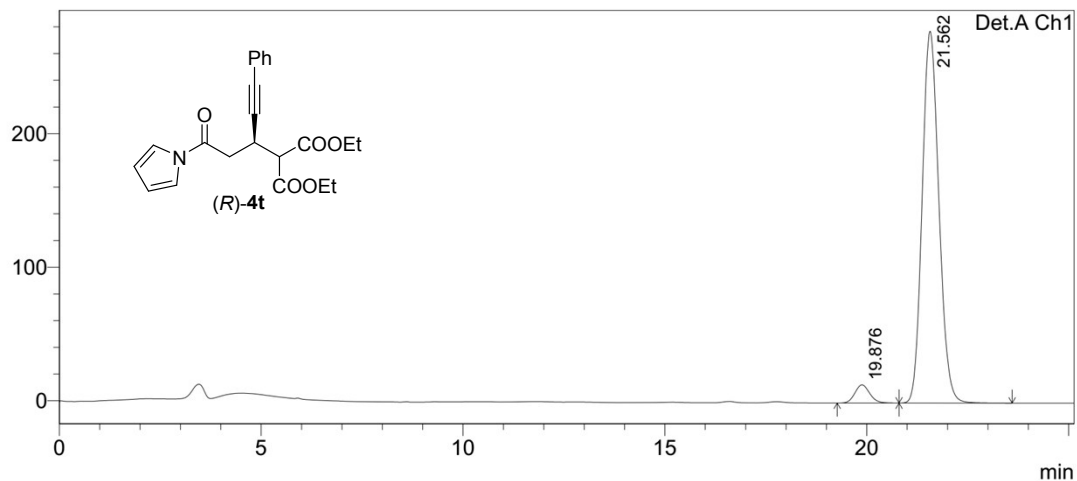

et.A Ch1/254nm

PeakTable

Detector A Ch1 254nm

| Peak# | Ret. Time | Area    | Height | Area %  | Height % |
|-------|-----------|---------|--------|---------|----------|
| 1     | 19.876    | 346688  | 13638  | 4.149   | 4.668    |
| 2     | 21.562    | 8009058 | 278522 | 95.851  | 95.332   |
| Total |           | 8355746 | 292161 | 100.000 | 100.000  |

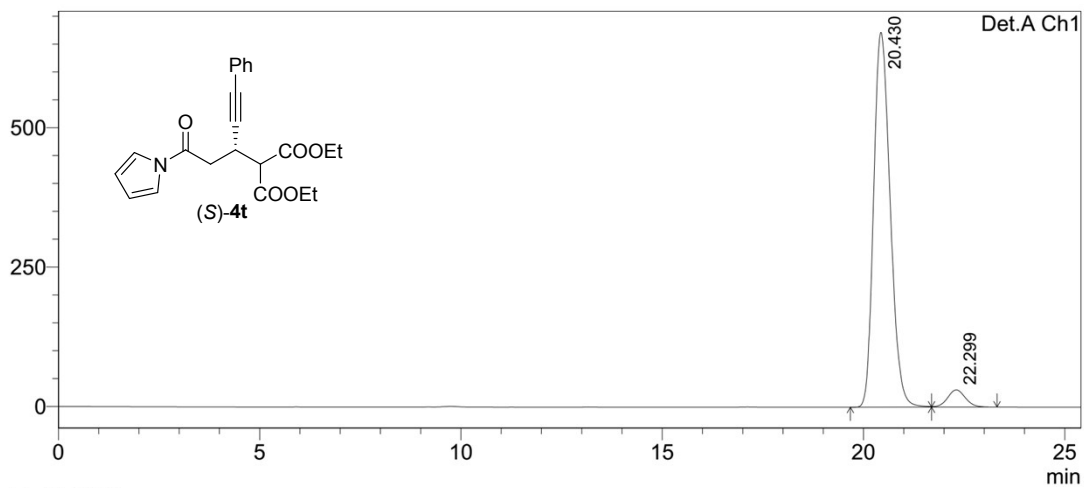

et.A Ch1/254nm

PeakTable

Detector A Ch1 254nm

| Peak# | Ret. Time | Area     | Height | Area %  | Height % |
|-------|-----------|----------|--------|---------|----------|
| 1     | 20.430    | 19221714 | 672691 | 95.291  | 95.598   |
| 2     | 22.299    | 949936   | 30975  | 4.709   | 4.402    |
| Total |           | 20171649 | 703666 | 100.000 | 100.000  |

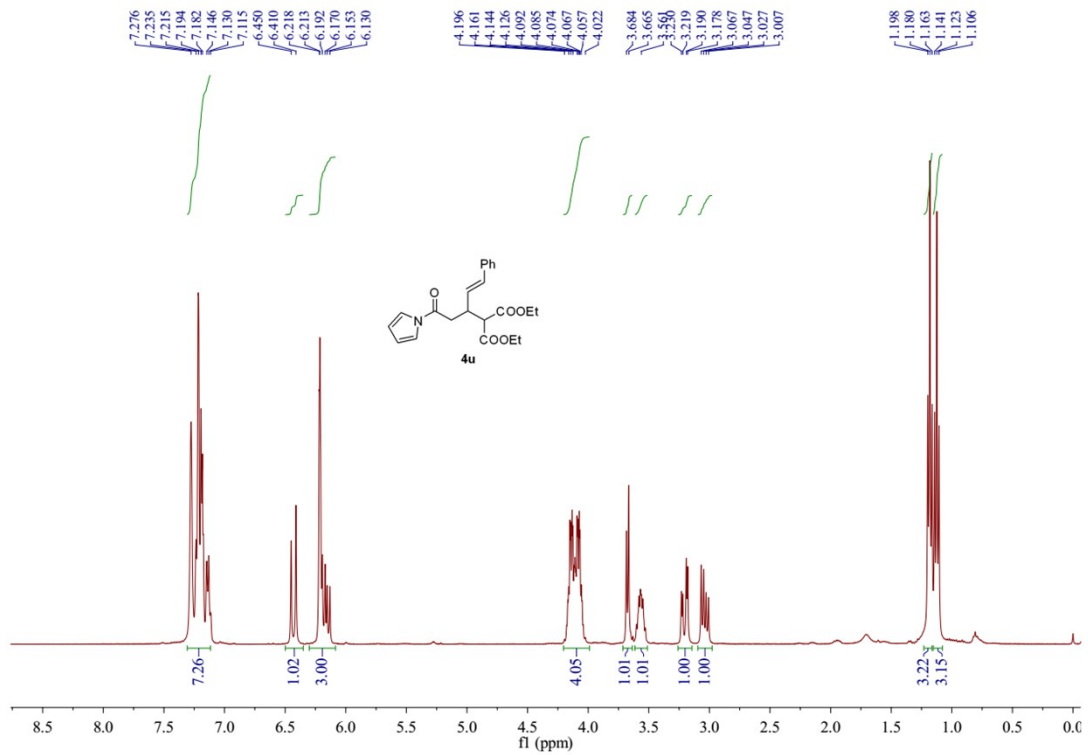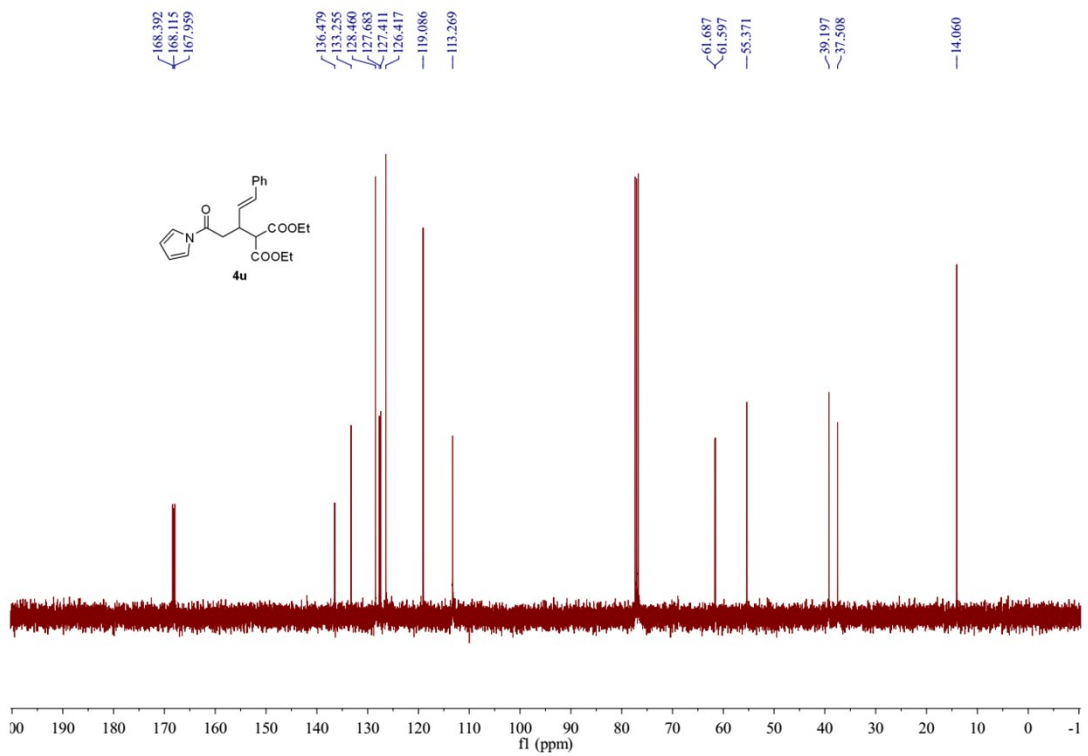

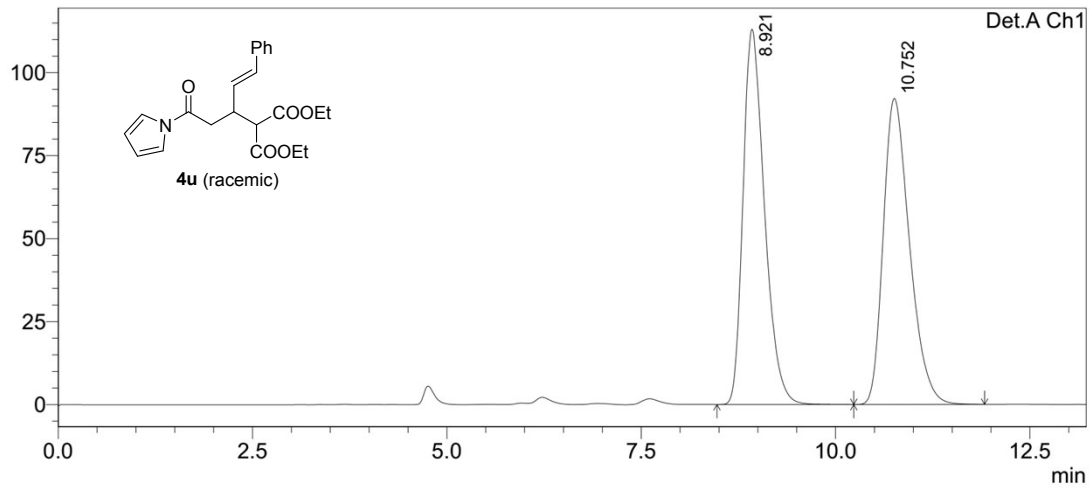

t.A Ch1/254nm

PeakTable

Detector A Ch1 254nm

| Peak# | Ret. Time | Area    | Height | Area %  | Height % |
|-------|-----------|---------|--------|---------|----------|
| 1     | 8.921     | 2172934 | 113114 | 50.071  | 55.092   |
| 2     | 10.752    | 2166812 | 92205  | 49.929  | 44.908   |
| Total |           | 4339746 | 205319 | 100.000 | 100.000  |

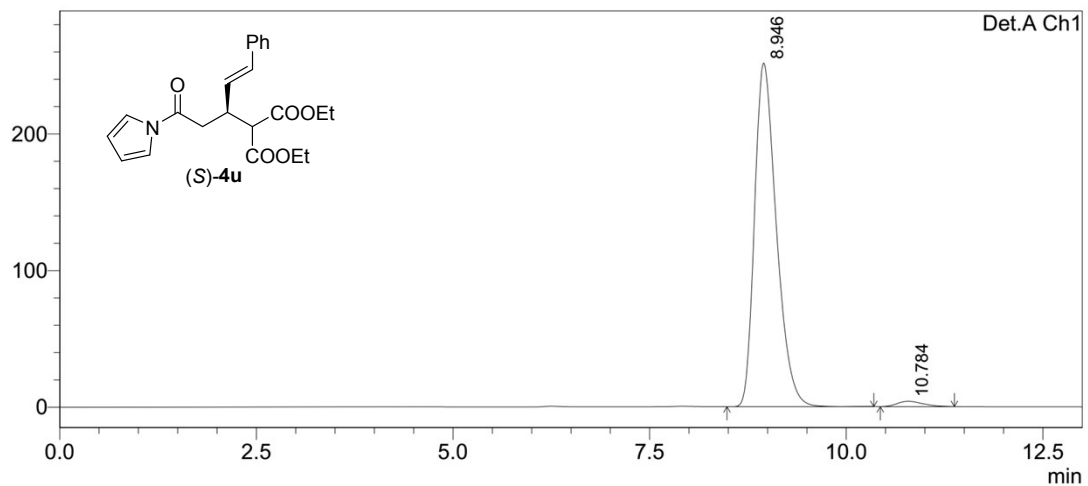

t.A Ch1/254nm

PeakTable

Detector A Ch1 254nm

| Peak# | Ret. Time | Area    | Height | Area %  | Height % |
|-------|-----------|---------|--------|---------|----------|
| 1     | 8.946     | 4854058 | 251559 | 98.187  | 98.466   |
| 2     | 10.784    | 89624   | 3919   | 1.813   | 1.534    |
| Total |           | 4943682 | 255478 | 100.000 | 100.000  |

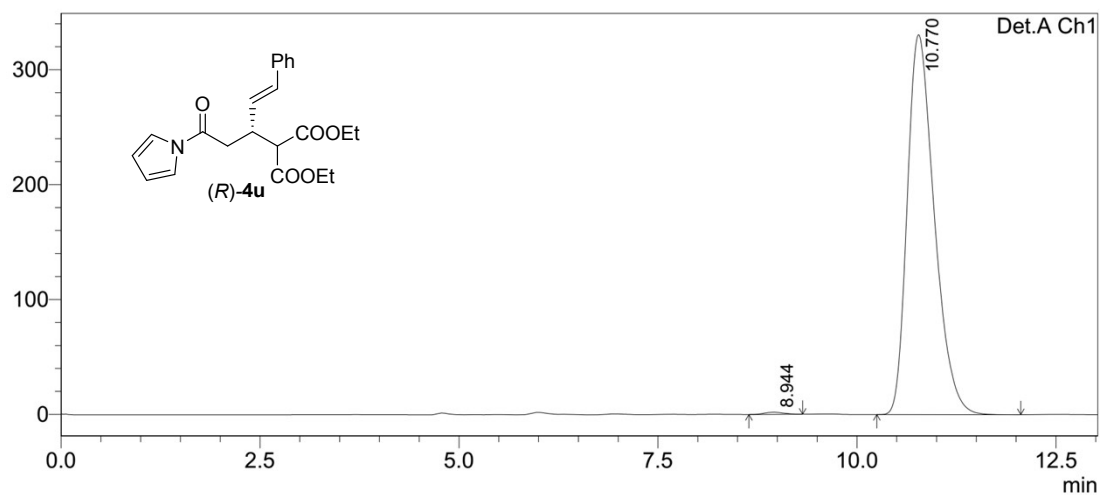

Det.A Ch1/254nm

PeakTable

Detector A Ch1 254nm

| Peak# | Ret. Time | Area    | Height | Area %  | Height % |
|-------|-----------|---------|--------|---------|----------|
| 1     | 8.944     | 31176   | 1813   | 0.397   | 0.545    |
| 2     | 10.770    | 7815985 | 330756 | 99.603  | 99.455   |
| Total |           | 7847161 | 332569 | 100.000 | 100.000  |

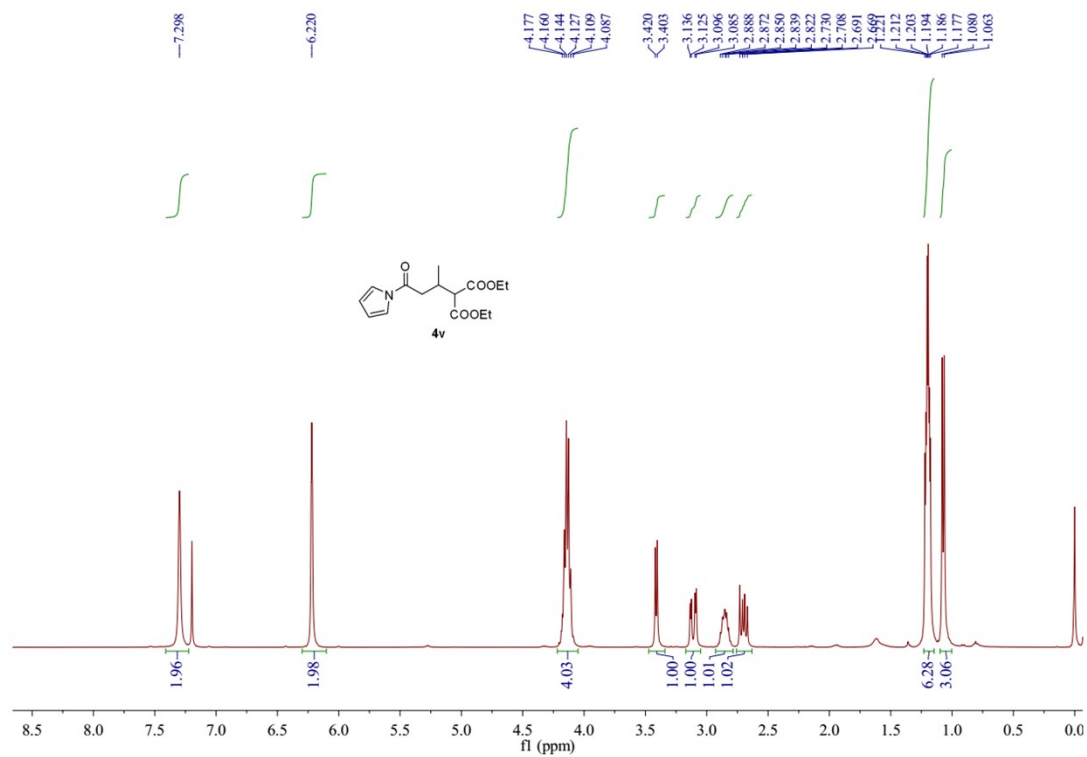

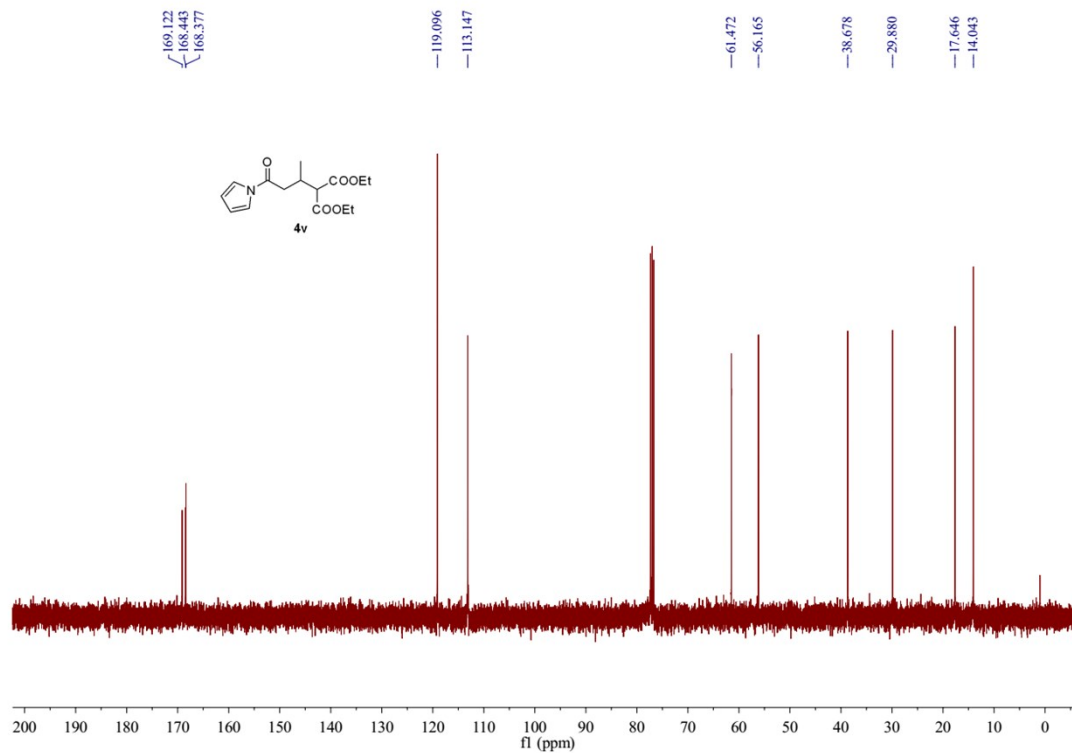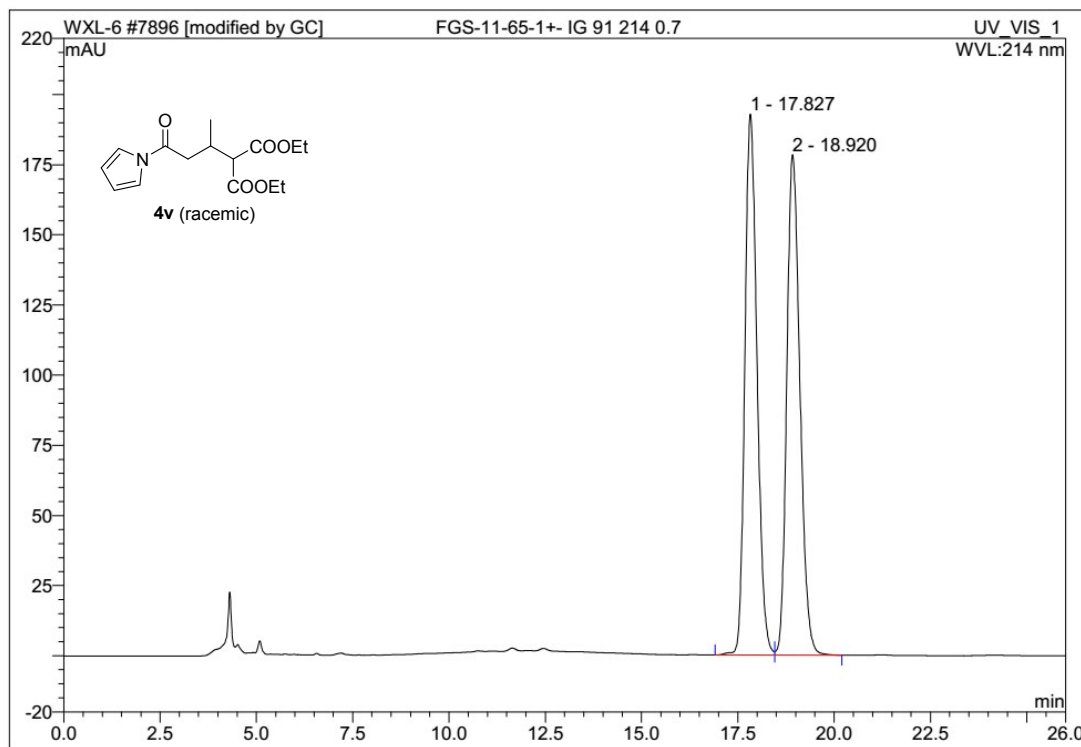

| No.           | Ret.Time<br>min | Peak Name | Height<br>mAU | Area<br>mAU*min | Rel.Area<br>% | Amount | Type |
|---------------|-----------------|-----------|---------------|-----------------|---------------|--------|------|
| 1             | 17.83           | n.a.      | 192.878       | 70.521          | 49.96         | n.a.   | BM   |
| 2             | 18.92           | n.a.      | 178.487       | 70.627          | 50.04         | n.a.   | MB   |
| <b>Total:</b> |                 |           | 371.366       | 141.148         | 100.00        | 0.000  |      |

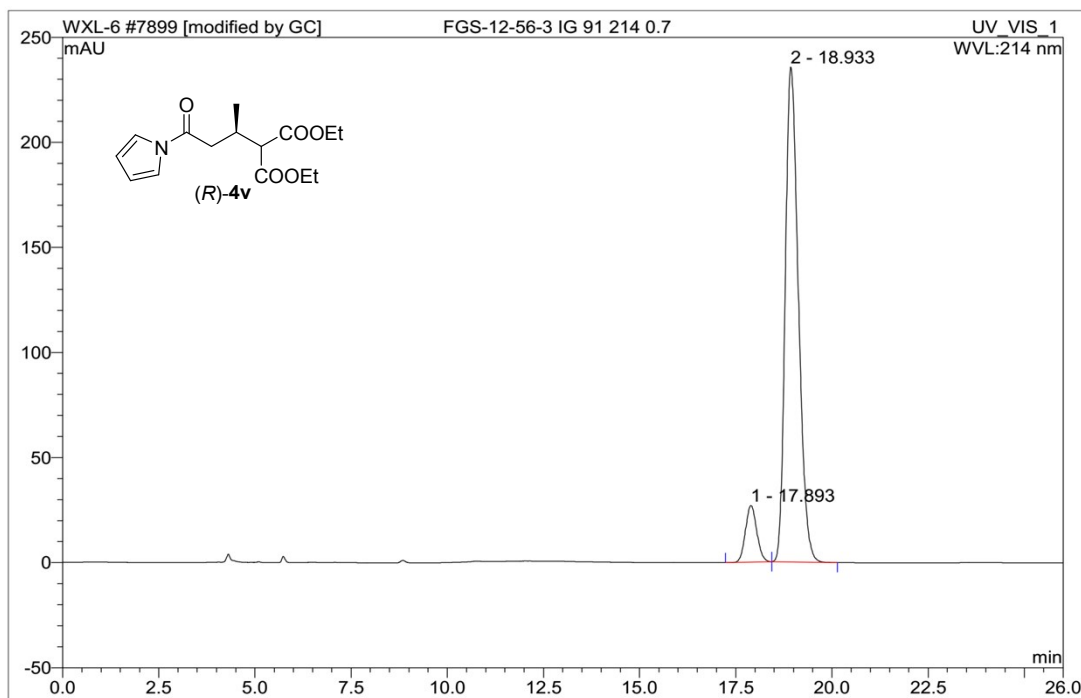

| No.           | Ret.Time<br>min | Peak Name | Height<br>mAU | Area<br>mAU*min | Rel.Area<br>% | Amount | Type |
|---------------|-----------------|-----------|---------------|-----------------|---------------|--------|------|
| 1             | 17.89           | n.a.      | 27.024        | 9.230           | 9.01          | n.a.   | BMb* |
| 2             | 18.93           | n.a.      | 235.611       | 93.167          | 90.99         | n.a.   | bMB* |
| <b>Total:</b> |                 |           | 262.634       | 102.397         | 100.00        | 0.000  |      |

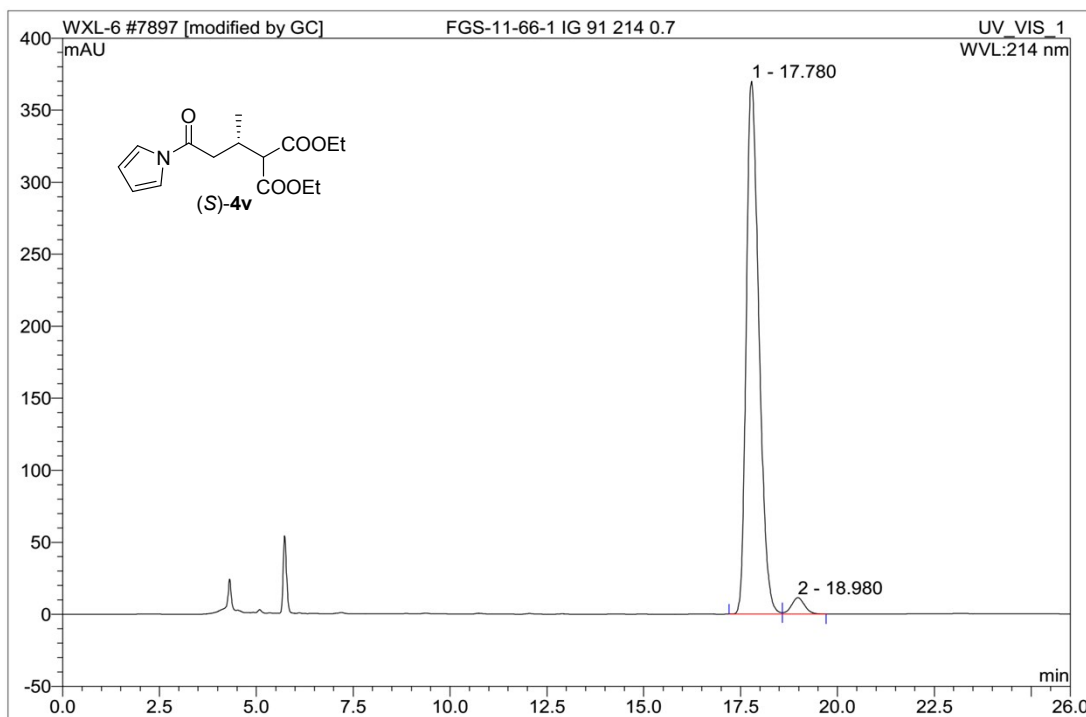

| No.           | Ret.Time<br>min | Peak Name | Height<br>mAU | Area<br>mAU*min | Rel.Area<br>% | Amount | Type |
|---------------|-----------------|-----------|---------------|-----------------|---------------|--------|------|
| 1             | 17.78           | n.a.      | 369.920       | 140.083         | 96.92         | n.a.   | BM   |
| 2             | 18.98           | n.a.      | 11.317        | 4.451           | 3.08          | n.a.   | MB   |
| <b>Total:</b> |                 |           | 381.237       | 144.534         | 100.00        | 0.000  |      |

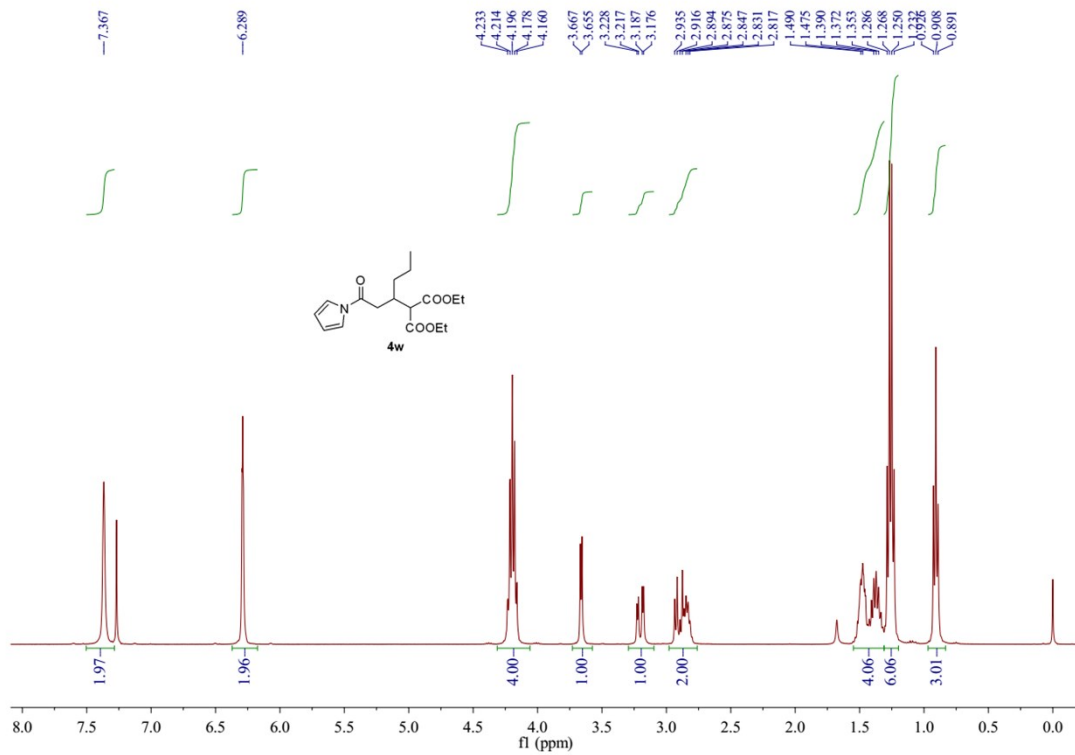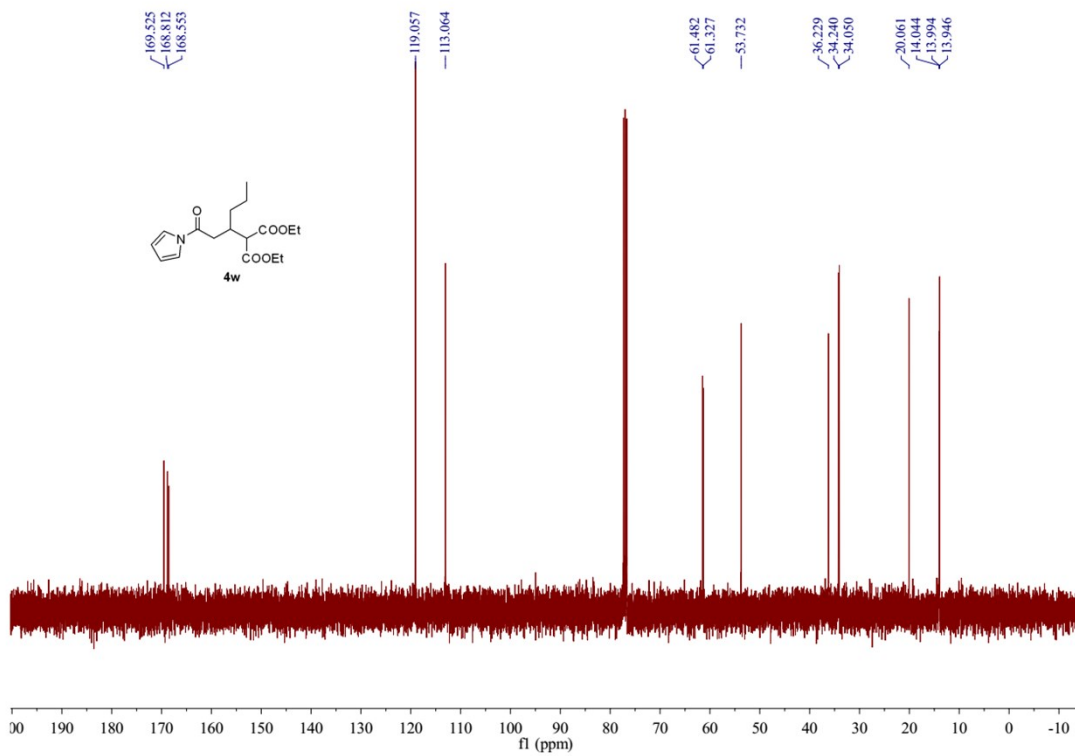



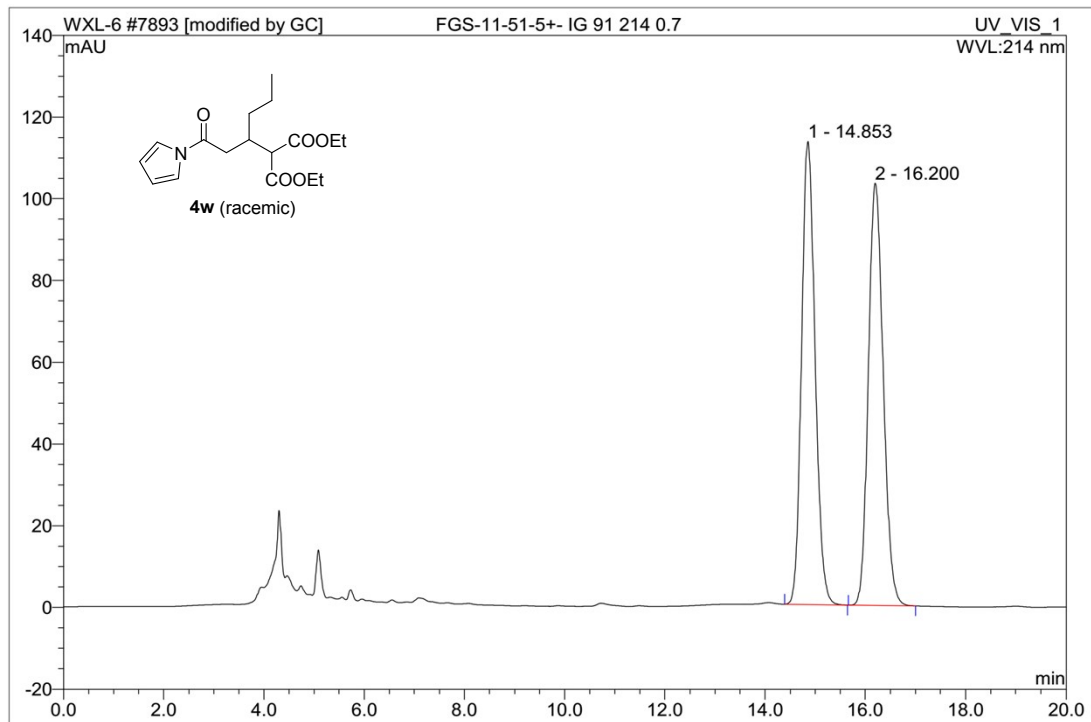

| No.           | Ret.Time<br>min | Peak Name | Height<br>mAU | Area<br>mAU*min | Rel.Area<br>% | Amount | Type |
|---------------|-----------------|-----------|---------------|-----------------|---------------|--------|------|
| 1             | 14.85           | n.a.      | 113.360       | 35.462          | 49.95         | n.a.   | BMB  |
| 2             | 16.20           | n.a.      | 103.332       | 35.536          | 50.05         | n.a.   | BMB  |
| <b>Total:</b> |                 |           | 216.692       | 70.998          | 100.00        | 0.000  |      |

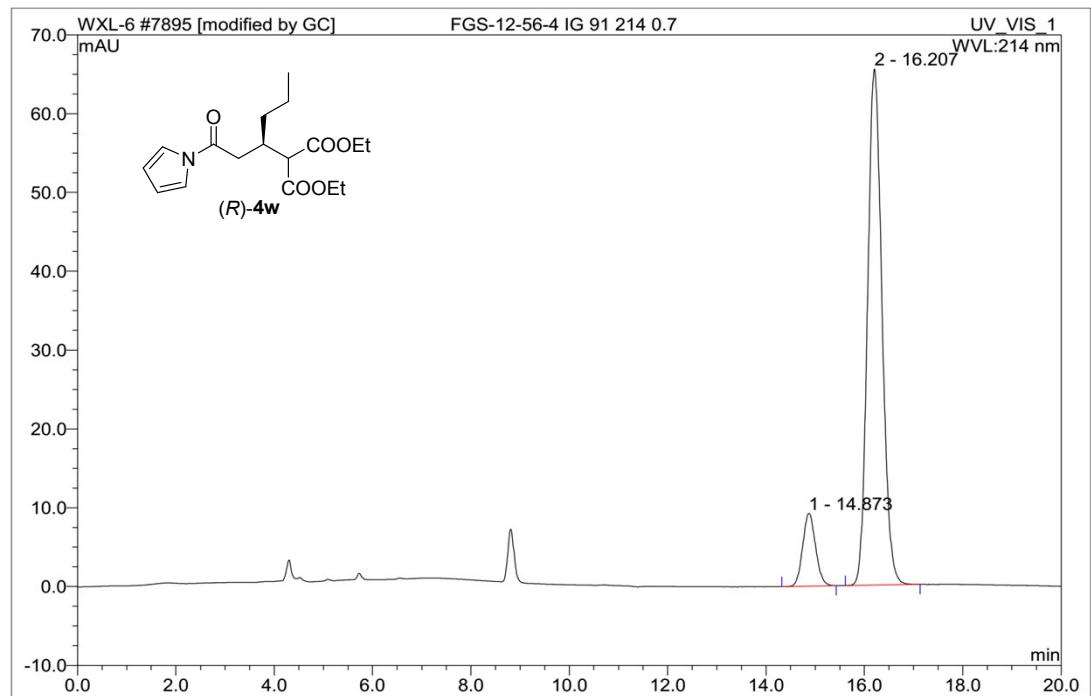

| No.           | Ret.Time<br>min | Peak Name | Height<br>mAU | Area<br>mAU*min | Rel.Area<br>% | Amount | Type |
|---------------|-----------------|-----------|---------------|-----------------|---------------|--------|------|
| 1             | 14.87           | n.a.      | 9.256         | 2.803           | 11.18         | n.a.   | BMB* |
| 2             | 16.21           | n.a.      | 65.480        | 22.274          | 88.82         | n.a.   | BMB* |
| <b>Total:</b> |                 |           | 74.735        | 25.077          | 100.00        | 0.000  |      |

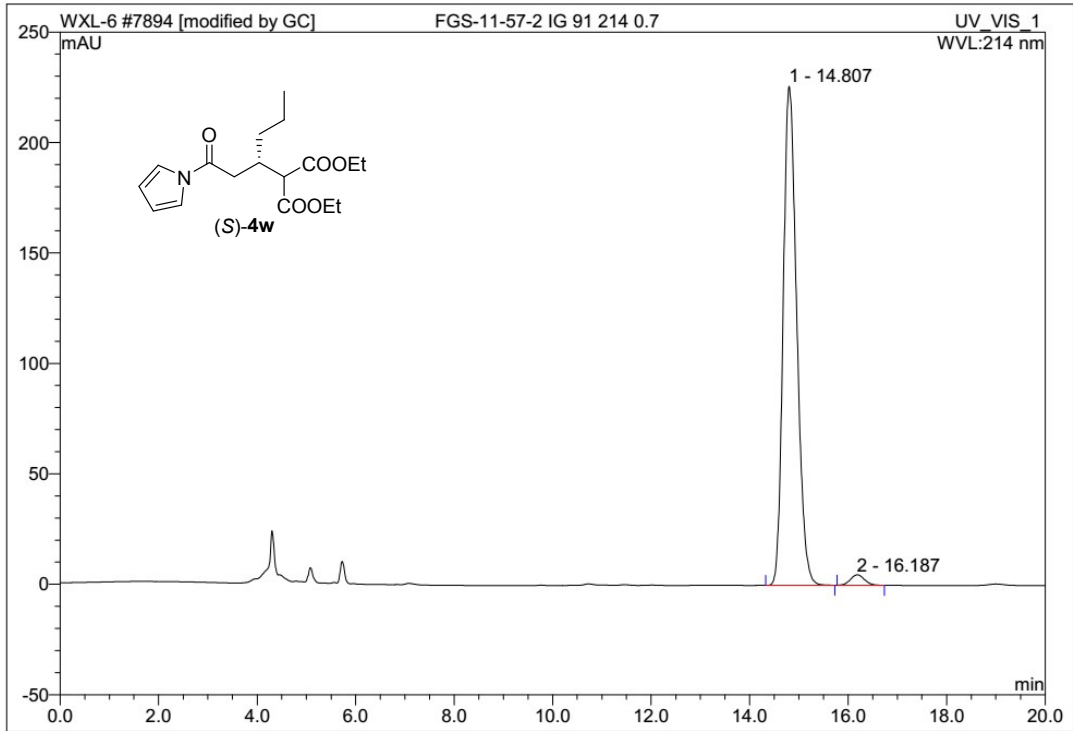

| No.           | Ret.Time<br>min | Peak Name | Height<br>mAU | Area<br>mAU*min | Rel.Area<br>% | Amount | Type |
|---------------|-----------------|-----------|---------------|-----------------|---------------|--------|------|
| 1             | 14.81           | n.a.      | 225.984       | 71.914          | 97.86         | n.a.   | BMB  |
| 2             | 16.19           | n.a.      | 4.754         | 1.569           | 2.14          | n.a.   | BMB  |
| <b>Total:</b> |                 |           | 230.738       | 73.483          | 100.00        | 0.000  |      |

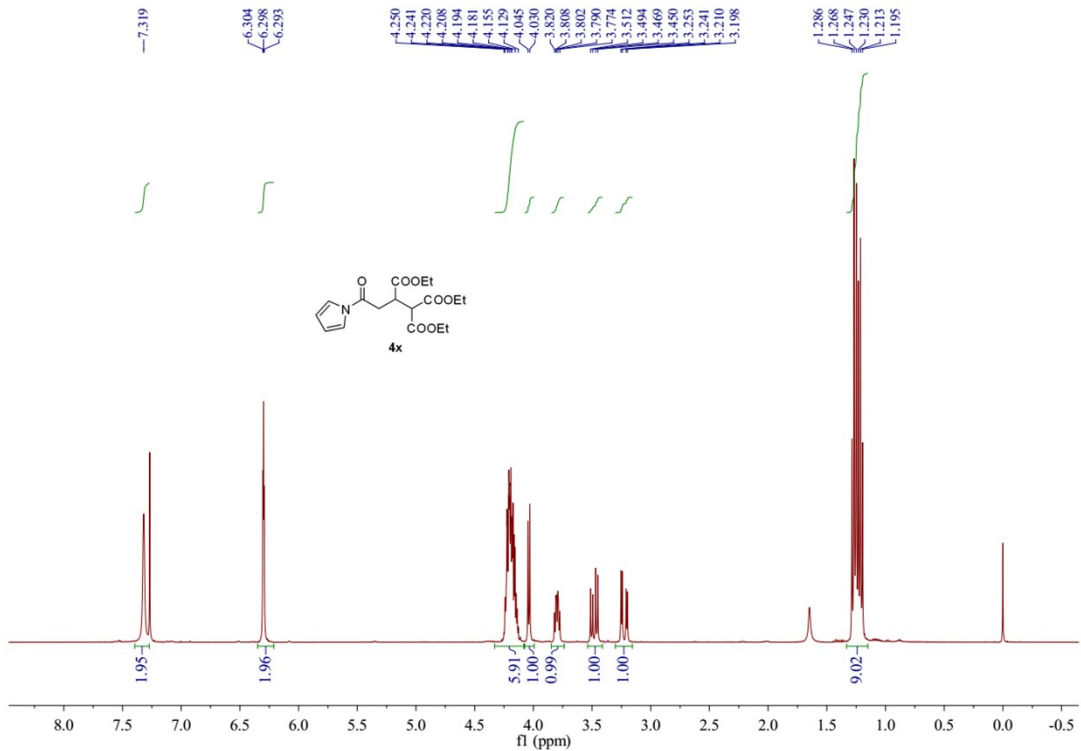

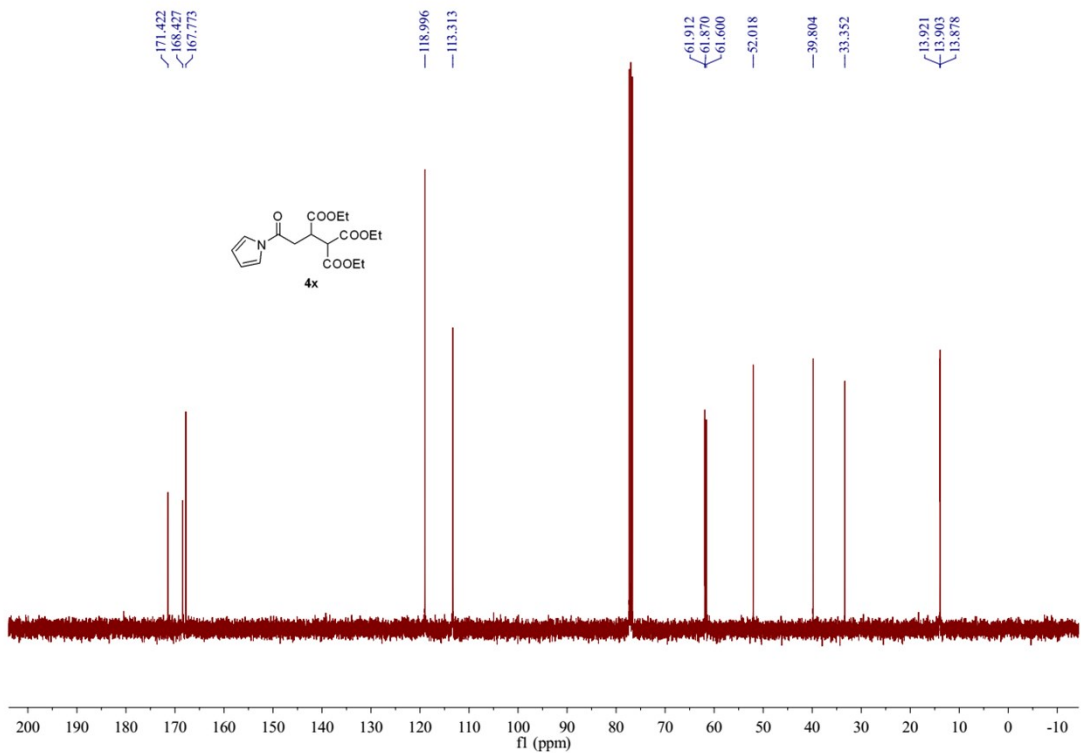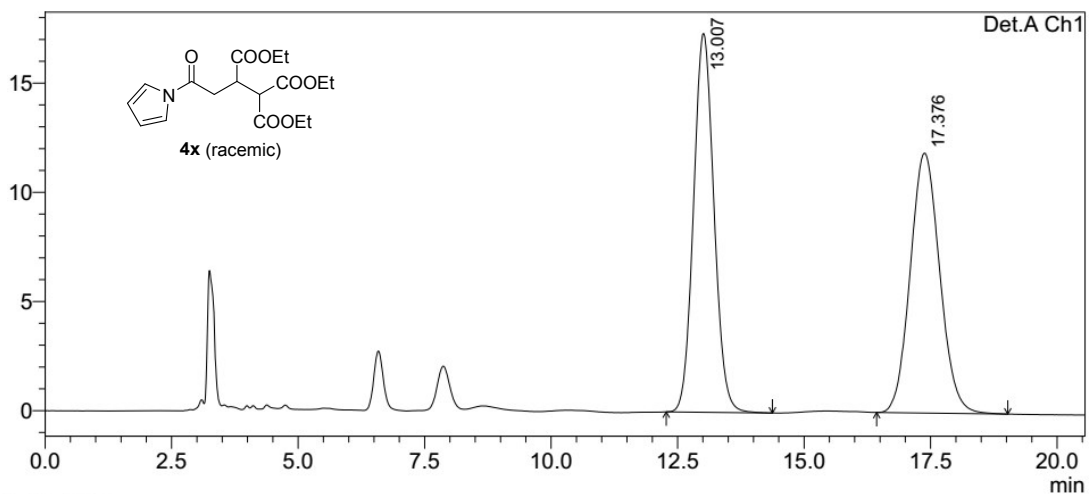

t.A Ch1/254nm

PeakTable

Detector A Ch1 254nm

| Peak# | Ret. Time | Area   | Height | Area %  | Height % |
|-------|-----------|--------|--------|---------|----------|
| 1     | 13.007    | 487077 | 17351  | 50.221  | 59.309   |
| 2     | 17.376    | 482786 | 11904  | 49.779  | 40.691   |
| Total |           | 969863 | 29256  | 100.000 | 100.000  |

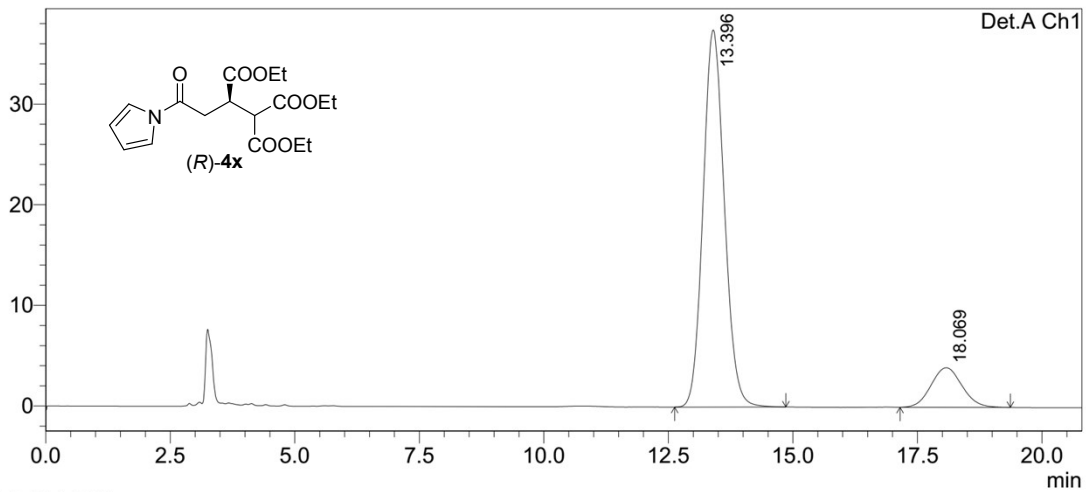

t.A Ch1/254nm

PeakTable

Detector A Ch1 254nm

| Peak# | Ret. Time | Area    | Height | Area %  | Height % |
|-------|-----------|---------|--------|---------|----------|
| 1     | 13.396    | 1112054 | 37475  | 86.719  | 90.476   |
| 2     | 18.069    | 170307  | 3945   | 13.281  | 9.524    |
| Total |           | 1282361 | 41420  | 100.000 | 100.000  |

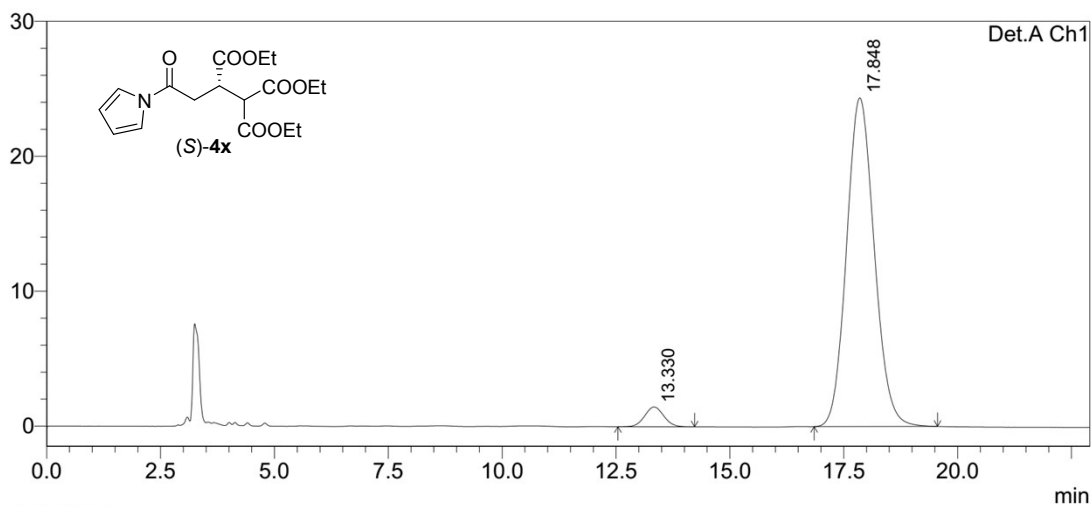

t.A Ch1/254nm

PeakTable

Detector A Ch1 254nm

| Peak# | Ret. Time | Area    | Height | Area %  | Height % |
|-------|-----------|---------|--------|---------|----------|
| 1     | 13.330    | 42585   | 1466   | 3.965   | 5.675    |
| 2     | 17.848    | 1031406 | 24360  | 96.035  | 94.325   |
| Total |           | 1073991 | 25825  | 100.000 | 100.000  |

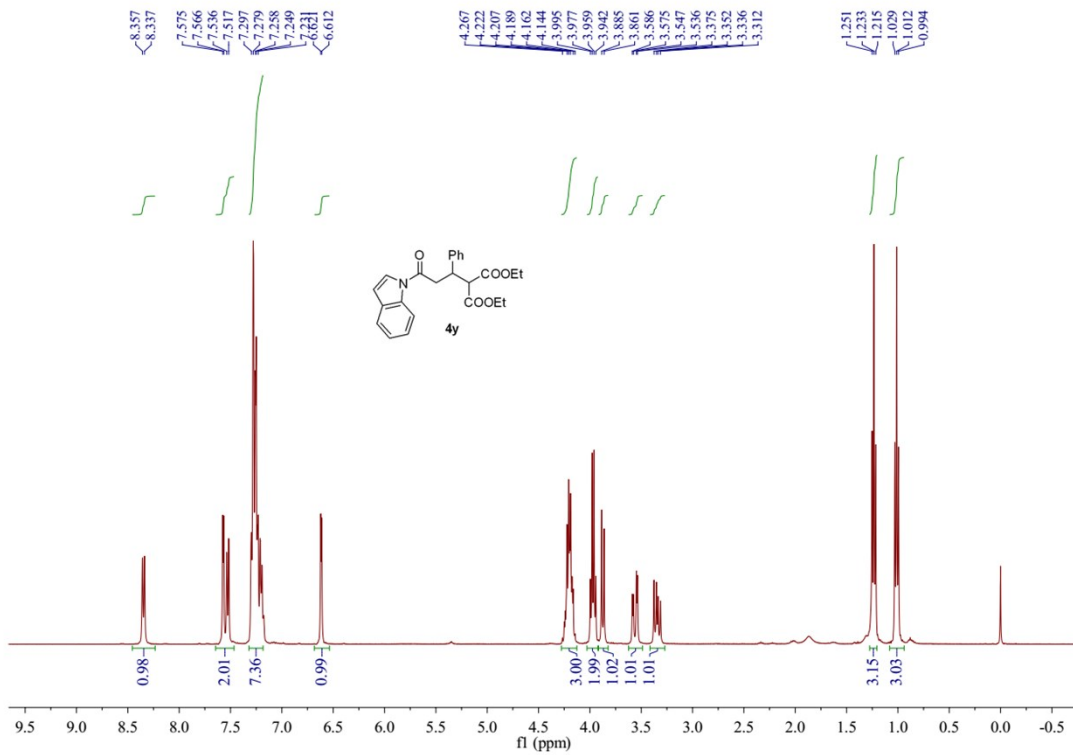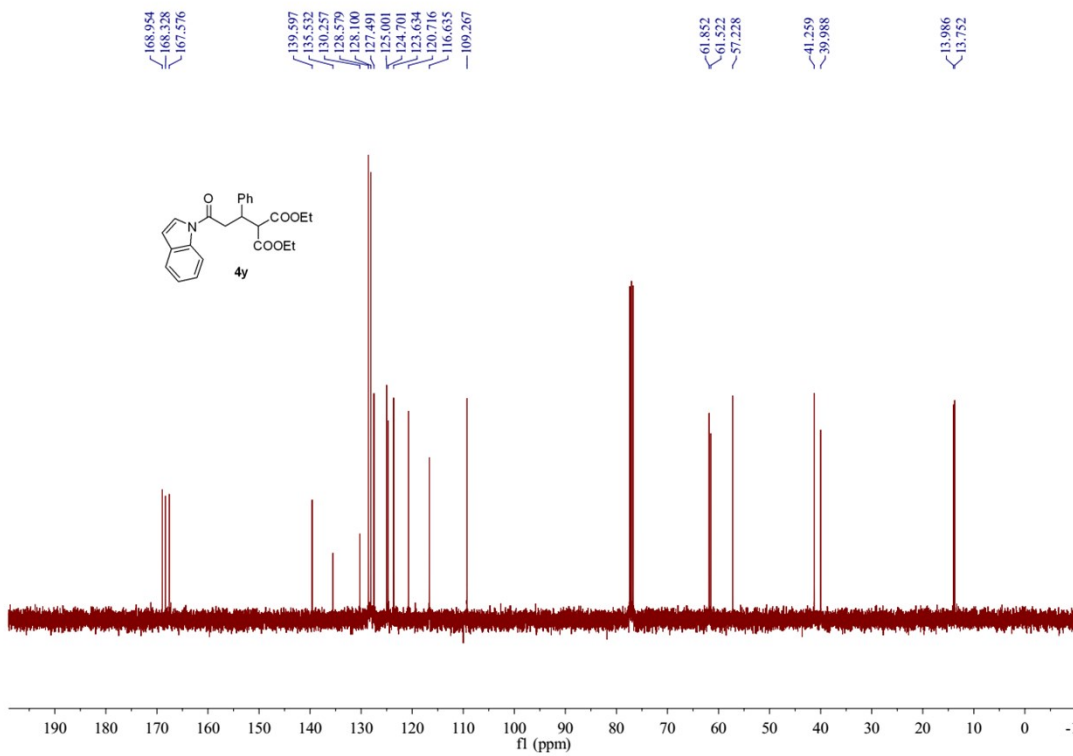

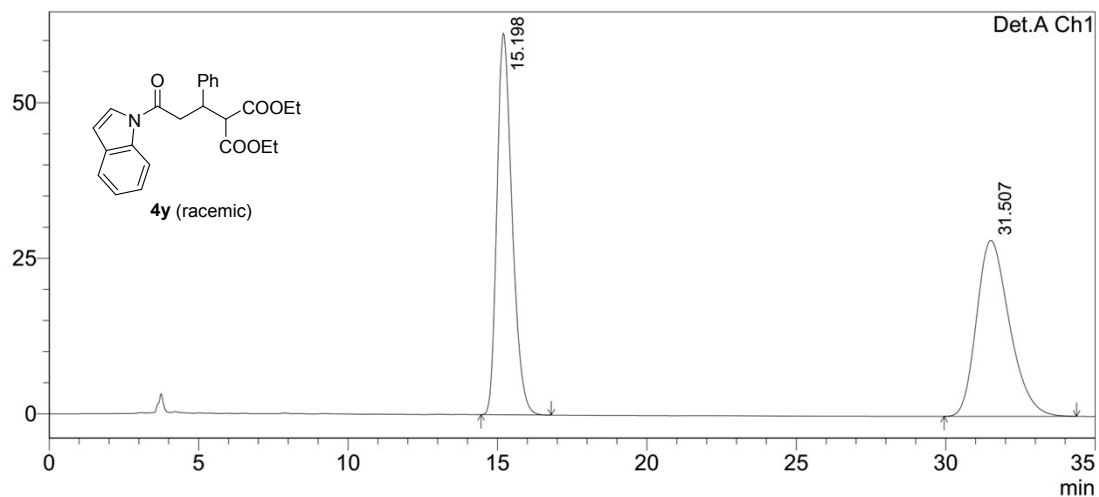

.A Ch1/254nm

PeakTable

Detector A Ch1 254nm

| Peak# | Ret. Time | Area    | Height | Area %  | Height % |
|-------|-----------|---------|--------|---------|----------|
| 1     | 15.198    | 2166453 | 61308  | 50.005  | 68.448   |
| 2     | 31.507    | 2166012 | 28260  | 49.995  | 31.552   |
| Total |           | 4332465 | 89568  | 100.000 | 100.000  |

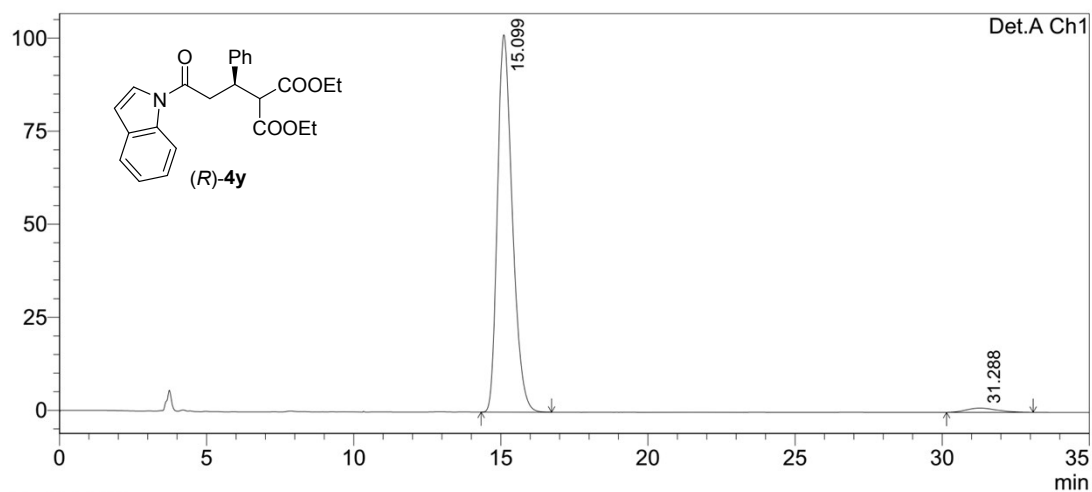

t.A Ch1/254nm

PeakTable

Detector A Ch1 254nm

| Peak# | Ret. Time | Area    | Height | Area %  | Height % |
|-------|-----------|---------|--------|---------|----------|
| 1     | 15.099    | 3576061 | 101399 | 97.741  | 98.895   |
| 2     | 31.288    | 82662   | 1133   | 2.259   | 1.105    |
| Total |           | 3658723 | 102532 | 100.000 | 100.000  |

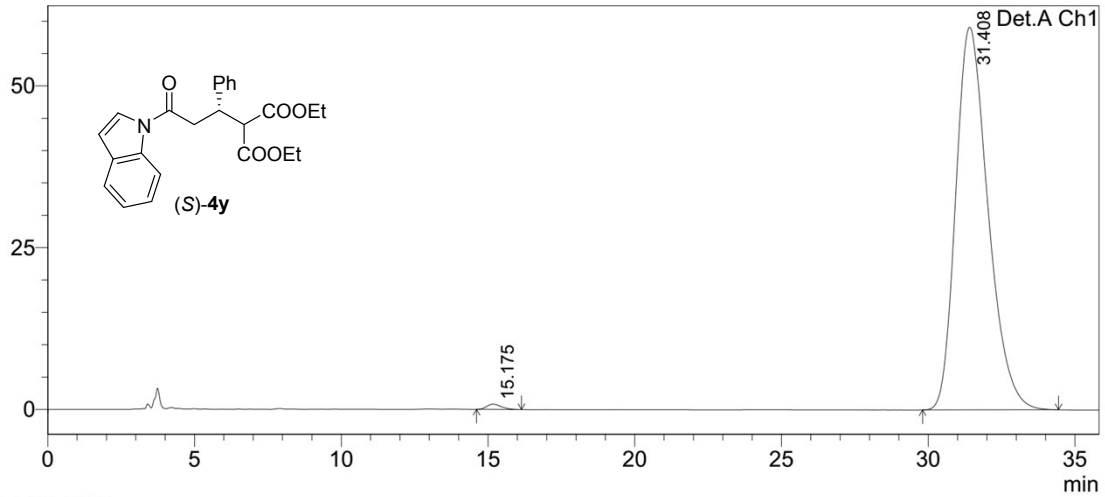

..A Ch1/254nm

PeakTable

Detector A Ch1 254nm

| Peak# | Ret. Time | Area    | Height | Area %  | Height % |
|-------|-----------|---------|--------|---------|----------|
| 1     | 15.175    | 28337   | 825    | 0.623   | 1.375    |
| 2     | 31.408    | 4522973 | 59140  | 99.377  | 98.625   |
| Total |           | 4551309 | 59965  | 100.000 | 100.000  |

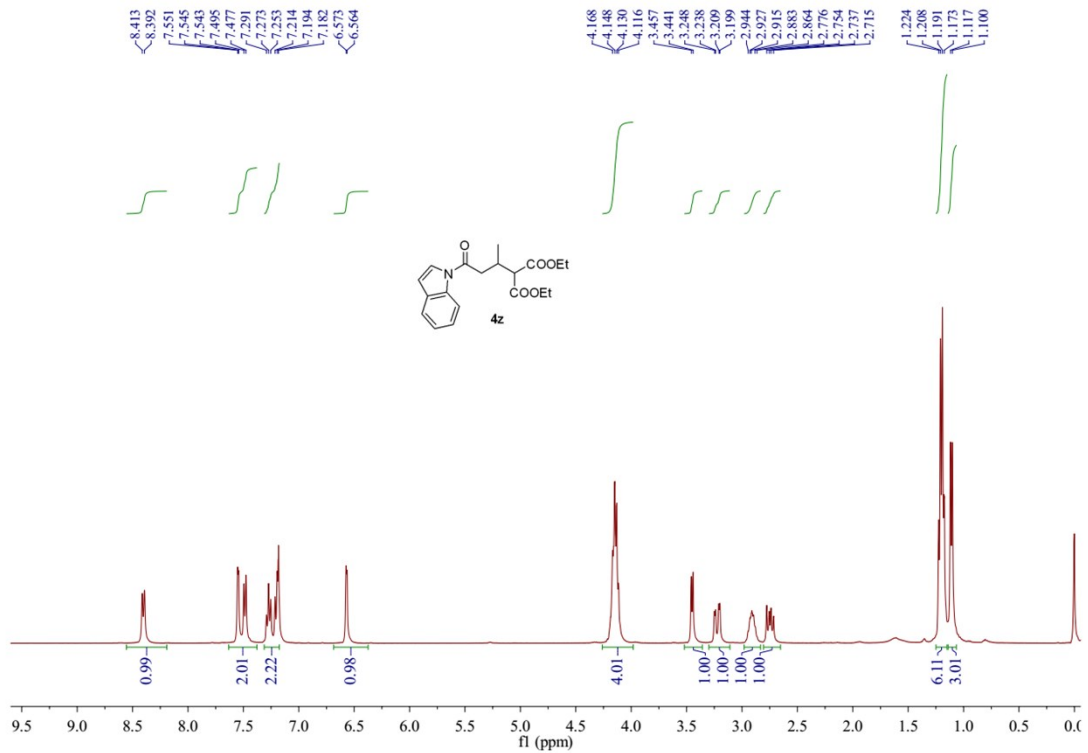

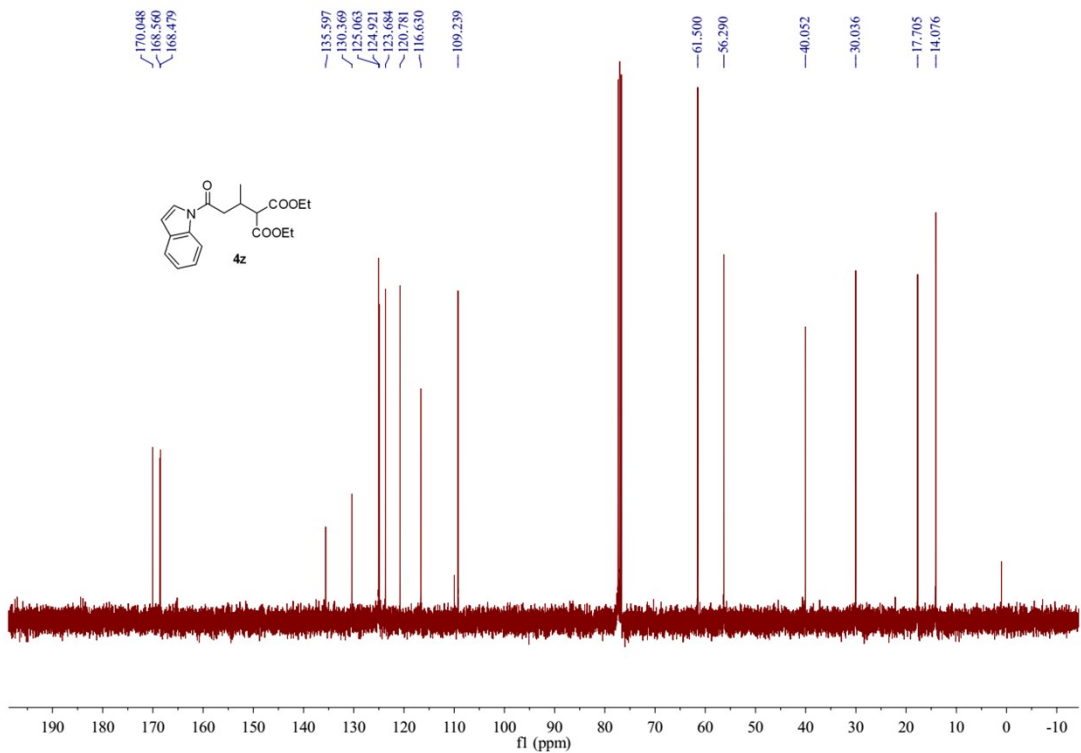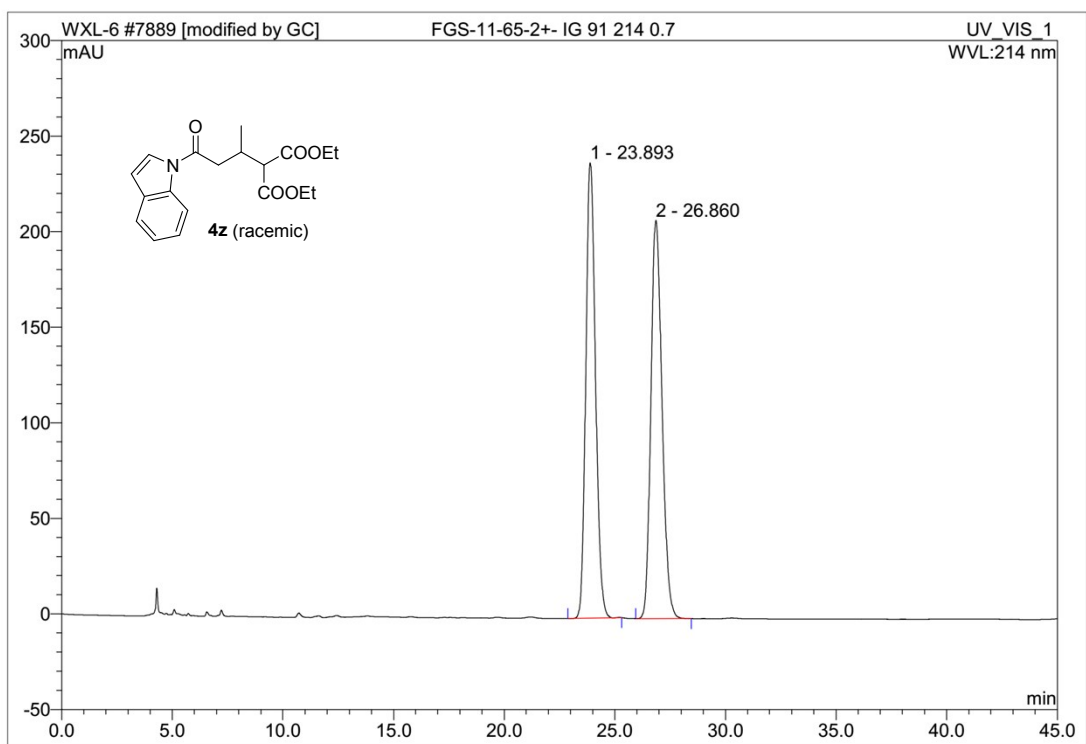

| No.           | Ret.Time<br>min | Peak Name | Height<br>mAU | Area<br>mAU*min | Rel.Area<br>% | Amount | Type |
|---------------|-----------------|-----------|---------------|-----------------|---------------|--------|------|
| 1             | 23.89           | n.a.      | 238.319       | 120.831         | 49.85         | n.a.   | BMB* |
| 2             | 26.86           | n.a.      | 208.333       | 121.569         | 50.15         | n.a.   | BMB  |
| <b>Total:</b> |                 |           | 446.653       | 242.400         | 100.00        | 0.000  |      |



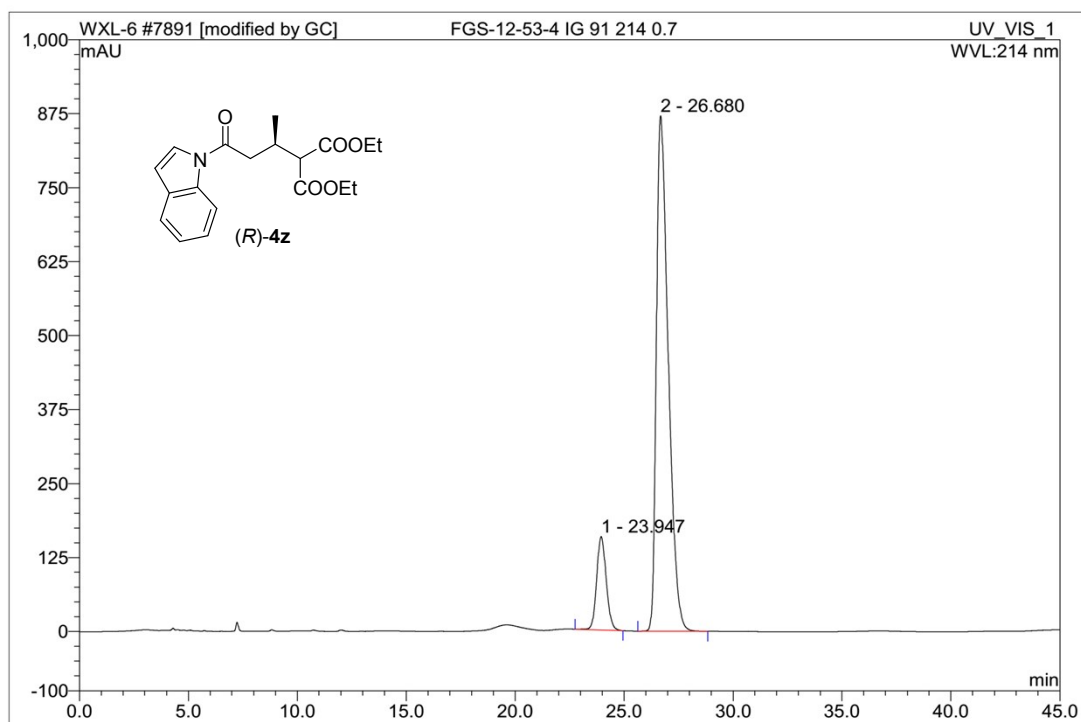

| No.           | Ret.Time<br>min | Peak Name | Height<br>mAU | Area<br>mAU*min | Rel.Area<br>% | Amount | Type |
|---------------|-----------------|-----------|---------------|-----------------|---------------|--------|------|
| 1             | 23.95           | n.a.      | 158.140       | 80.444          | 12.76         | n.a.   | BMB* |
| 2             | 26.68           | n.a.      | 870.687       | 550.191         | 87.24         | n.a.   | BMB* |
| <b>Total:</b> |                 |           | 1028.826      | 630.634         | 100.00        | 0.000  |      |

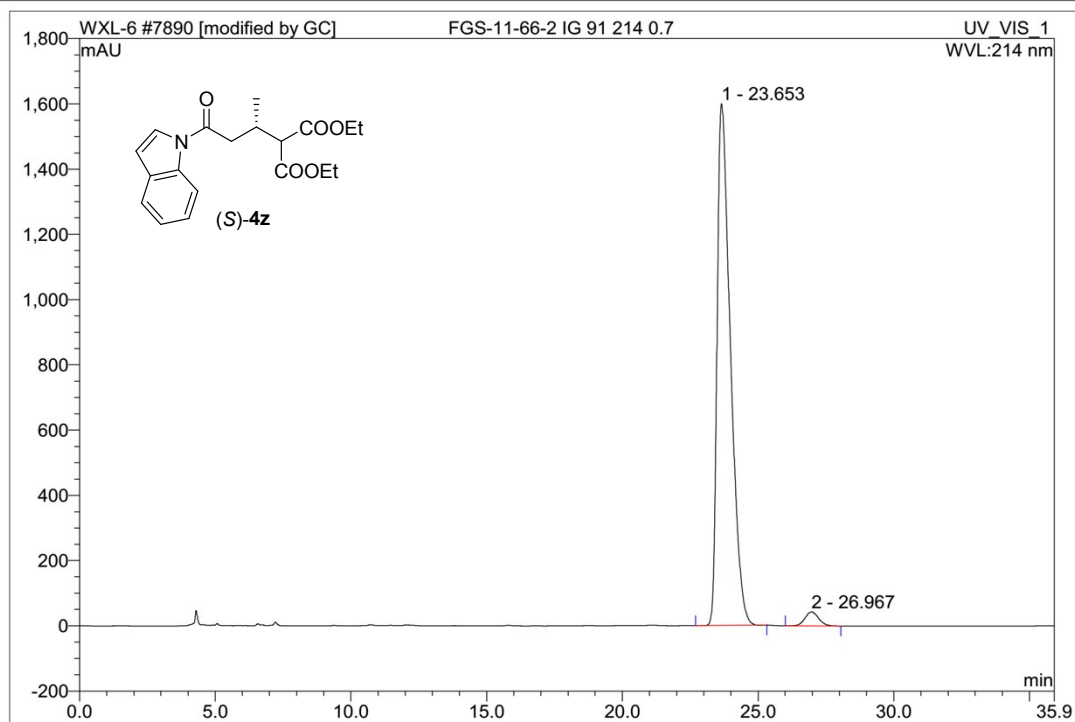

| No.           | Ret.Time<br>min | Peak Name | Height<br>mAU | Area<br>mAU*min | Rel.Area<br>% | Amount | Type |
|---------------|-----------------|-----------|---------------|-----------------|---------------|--------|------|
| 1             | 23.65           | n.a.      | 1600.056      | 906.022         | 97.32         | n.a.   | BMB* |
| 2             | 26.97           | n.a.      | 42.777        | 24.949          | 2.68          | n.a.   | BMB  |
| <b>Total:</b> |                 |           | 1642.833      | 930.971         | 100.00        | 0.000  |      |

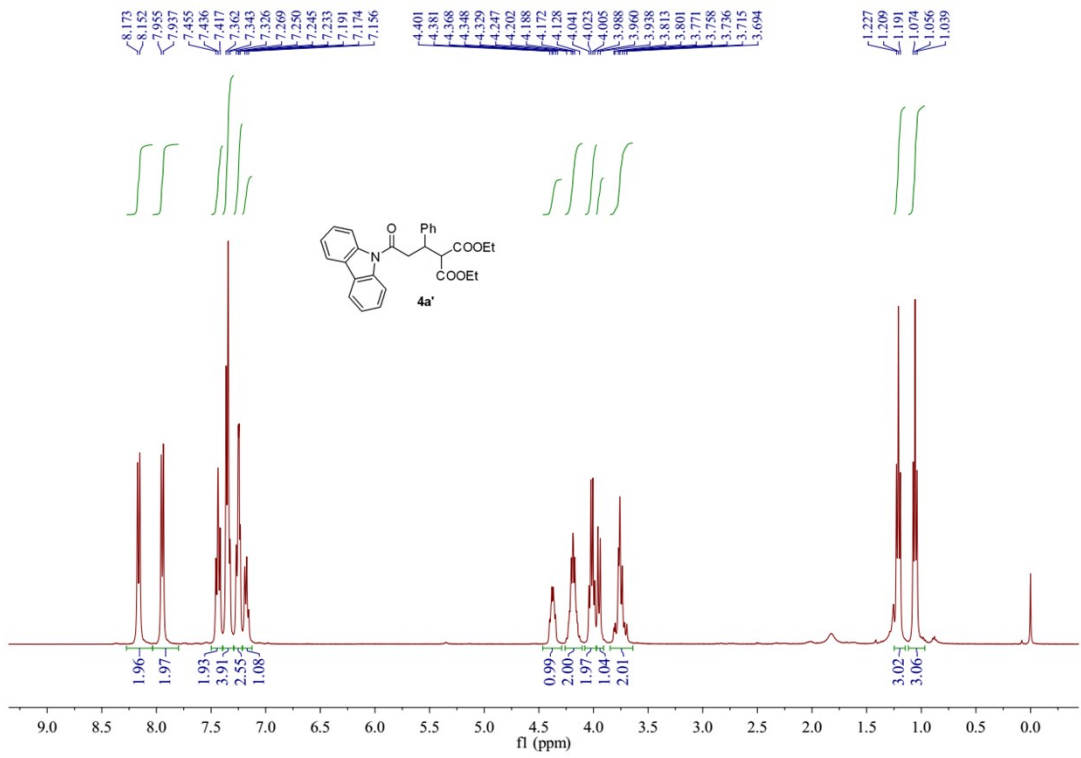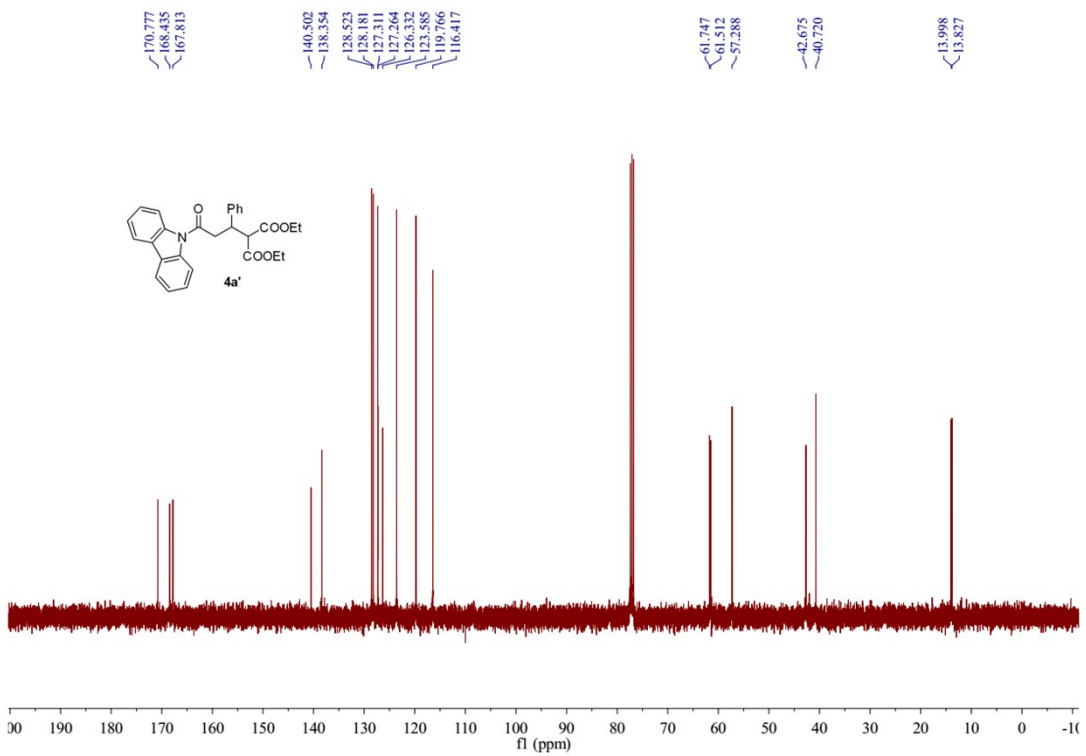

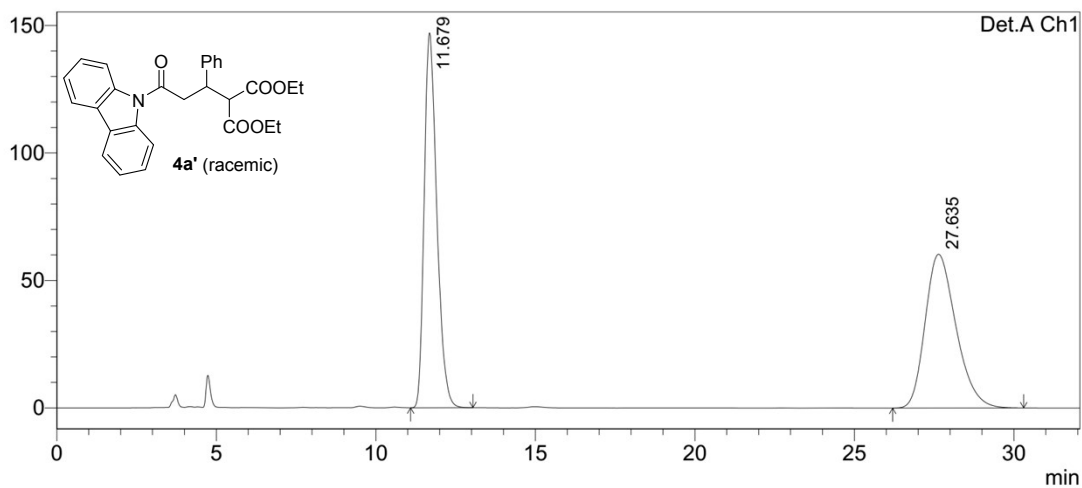

et.A Ch1/254nm

PeakTable

Detector A Ch1 254nm

| Peak# | Ret. Time | Area    | Height | Area %  | Height % |
|-------|-----------|---------|--------|---------|----------|
| 1     | 11.679    | 4042296 | 147062 | 49.910  | 70.911   |
| 2     | 27.635    | 4056828 | 60329  | 50.090  | 29.089   |
| Total |           | 8099123 | 207391 | 100.000 | 100.000  |

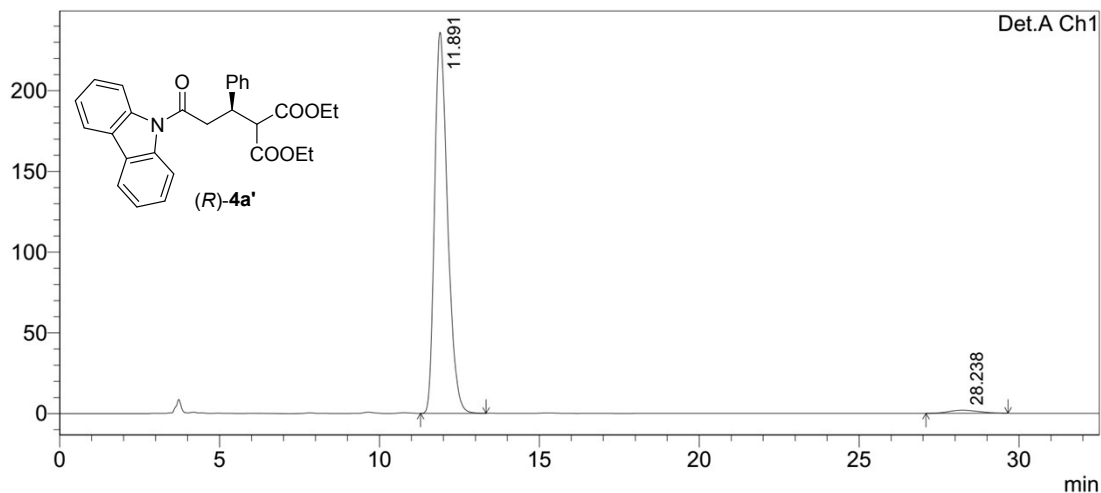

et.A Ch1/254nm

PeakTable

Detector A Ch1 254nm

| Peak# | Ret. Time | Area    | Height | Area %  | Height % |
|-------|-----------|---------|--------|---------|----------|
| 1     | 11.891    | 6659074 | 235984 | 98.195  | 99.206   |
| 2     | 28.238    | 122406  | 1888   | 1.805   | 0.794    |
| Total |           | 6781480 | 237871 | 100.000 | 100.000  |

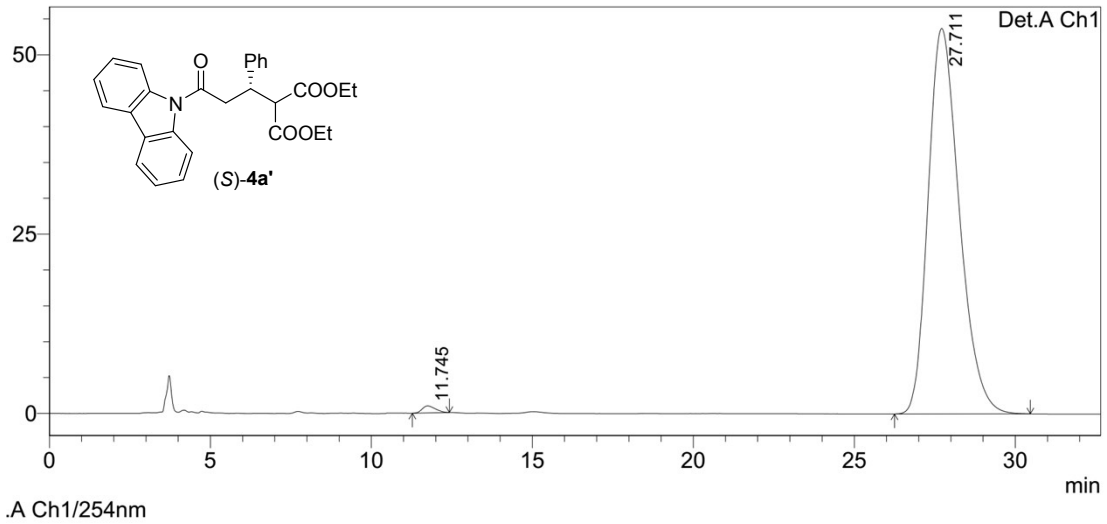

PeakTable

Detector A Ch1 254nm

| Peak# | Ret. Time | Area    | Height | Area %  | Height % |
|-------|-----------|---------|--------|---------|----------|
| 1     | 11.745    | 27735   | 981    | 0.759   | 1.793    |
| 2     | 27.711    | 3626338 | 53744  | 99.241  | 98.207   |
| Total |           | 3654073 | 54725  | 100.000 | 100.000  |

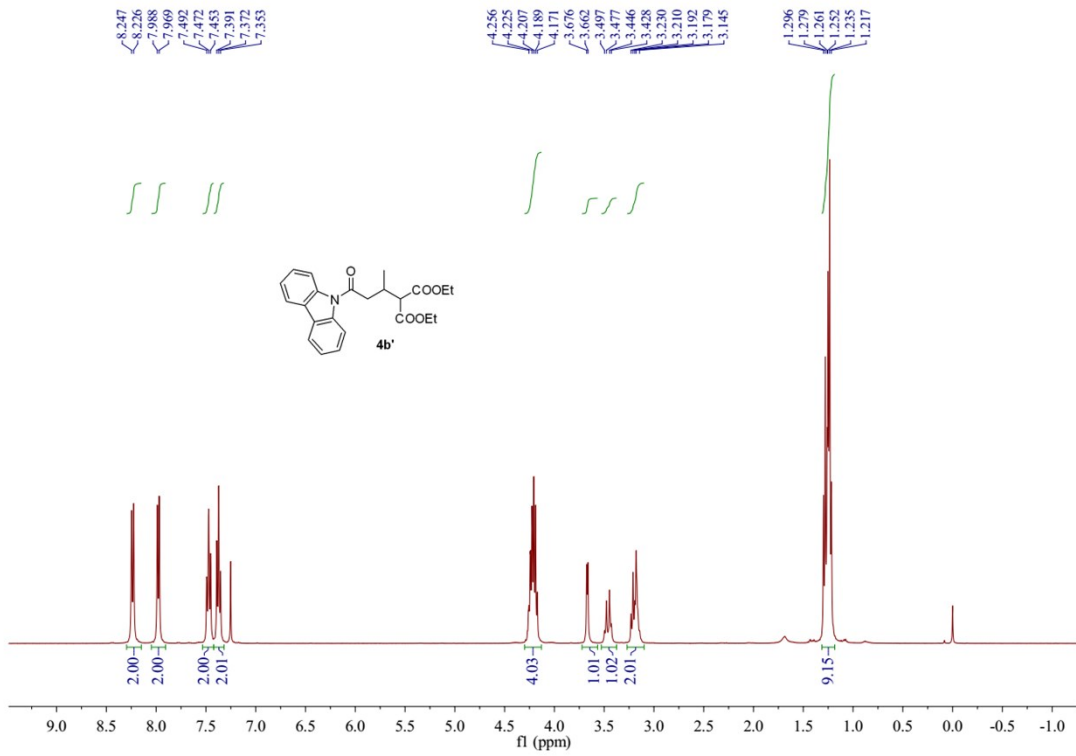

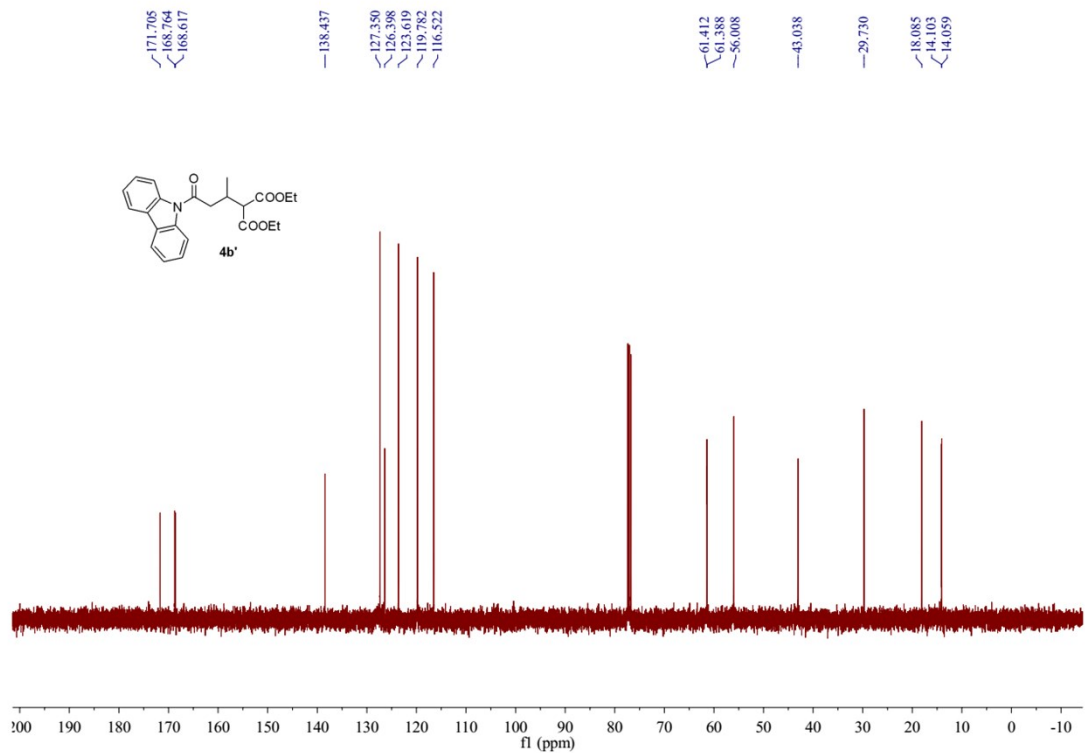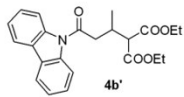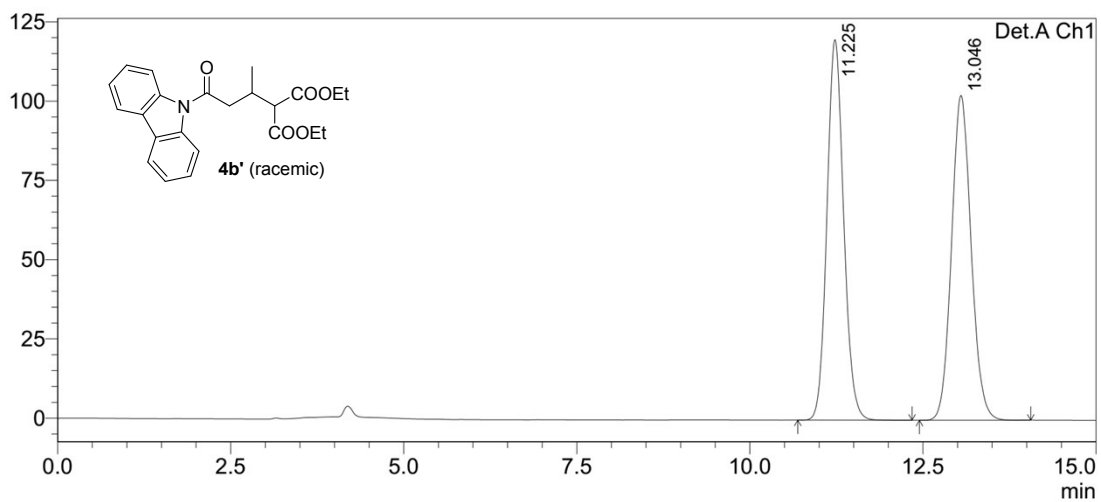

st.A Ch1/254nm

PeakTable

Detector A Ch1 254nm

| Peak# | Ret. Time | Area    | Height | Area %  | Height % |
|-------|-----------|---------|--------|---------|----------|
| 1     | 11.225    | 2017232 | 120012 | 49.945  | 53.940   |
| 2     | 13.046    | 2021707 | 102479 | 50.055  | 46.060   |
| Total |           | 4038938 | 222491 | 100.000 | 100.000  |

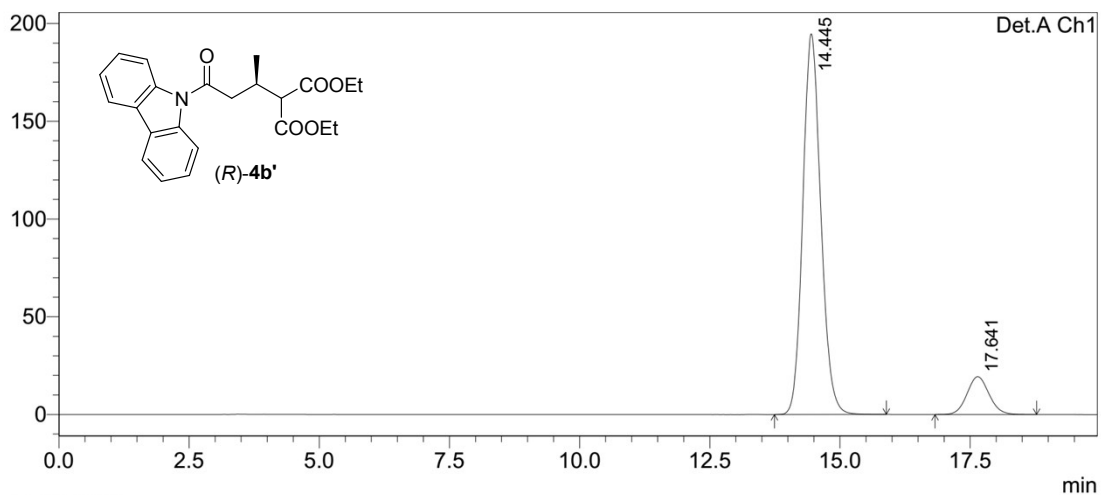

et.A Ch1/254nm

PeakTable

Detector A Ch1 254nm

| Peak# | Ret. Time | Area    | Height | Area %  | Height % |
|-------|-----------|---------|--------|---------|----------|
| 1     | 14.445    | 4684427 | 194753 | 89.167  | 90.966   |
| 2     | 17.641    | 569097  | 19342  | 10.833  | 9.034    |
| Total |           | 5253524 | 214095 | 100.000 | 100.000  |

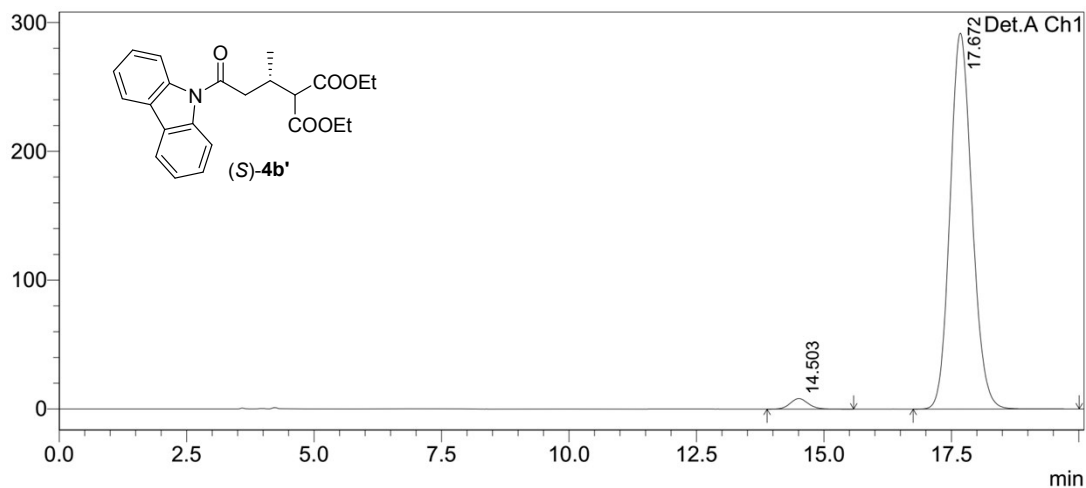

et.A Ch1/254nm

PeakTable

Detector A Ch1 254nm

| Peak# | Ret. Time | Area    | Height | Area %  | Height % |
|-------|-----------|---------|--------|---------|----------|
| 1     | 14.503    | 199719  | 8153   | 2.230   | 2.718    |
| 2     | 17.672    | 8757099 | 291772 | 97.770  | 97.282   |
| Total |           | 8956818 | 299925 | 100.000 | 100.000  |

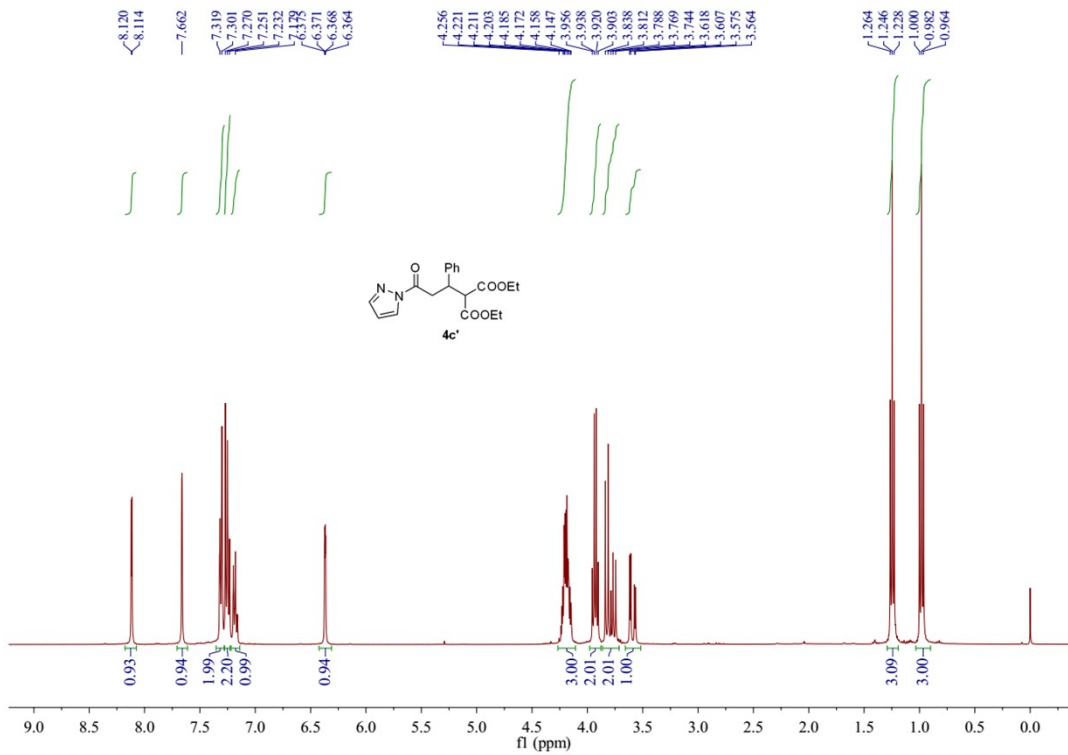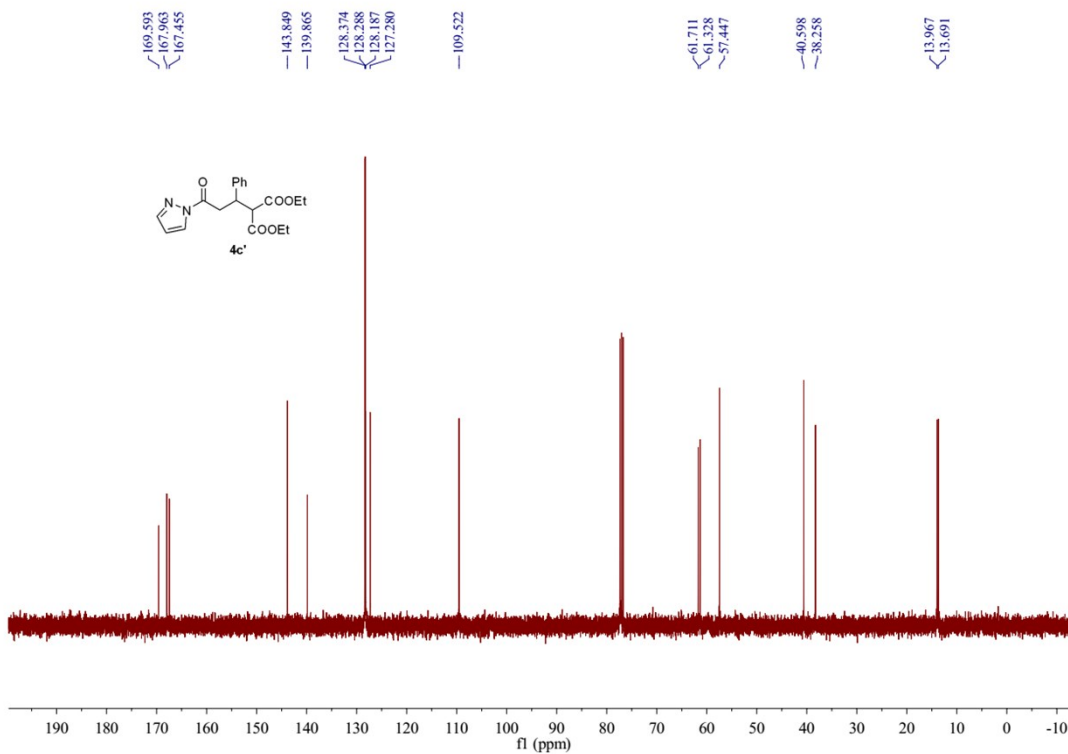

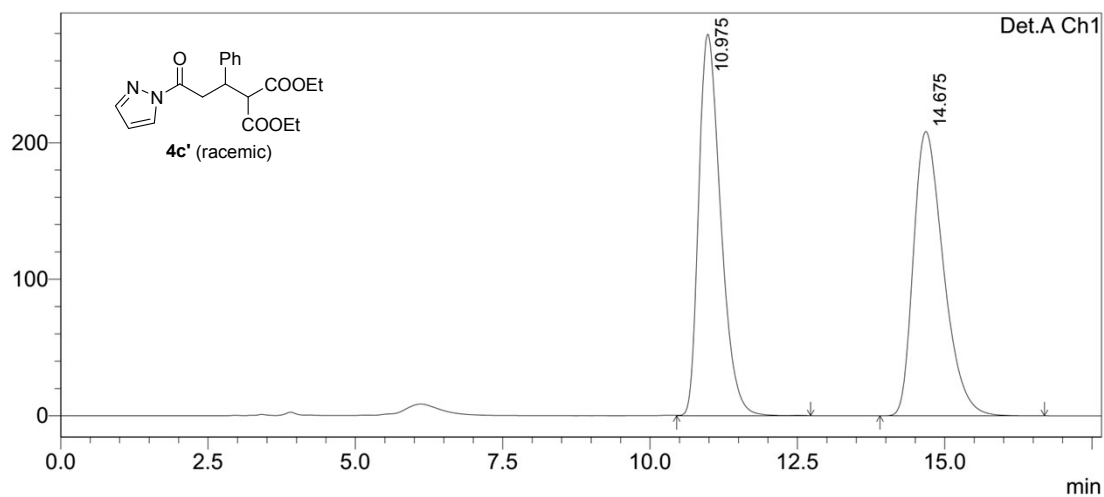

t.A Ch1/254nm

PeakTable

Detector A Ch1 254nm

| Peak# | Ret. Time | Area     | Height | Area %  | Height % |
|-------|-----------|----------|--------|---------|----------|
| 1     | 10.975    | 7262424  | 279337 | 49.606  | 57.297   |
| 2     | 14.675    | 7377909  | 208191 | 50.394  | 42.703   |
| Total |           | 14640333 | 487528 | 100.000 | 100.000  |

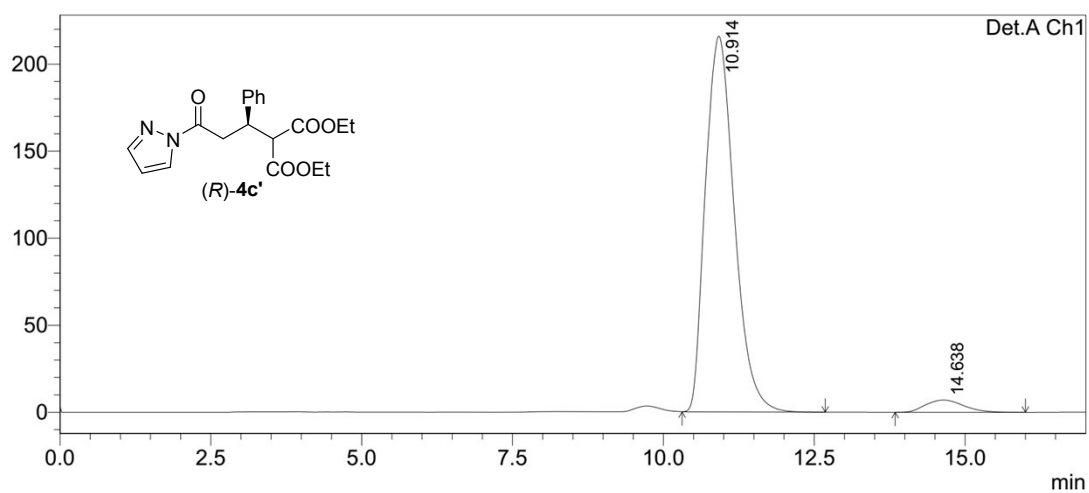

et.A Ch1/254nm

PeakTable

Detector A Ch1 254nm

| Peak# | Ret. Time | Area    | Height | Area %  | Height % |
|-------|-----------|---------|--------|---------|----------|
| 1     | 10.914    | 7199511 | 215917 | 95.855  | 96.812   |
| 2     | 14.638    | 311308  | 7110   | 4.145   | 3.188    |
| Total |           | 7510820 | 223027 | 100.000 | 100.000  |



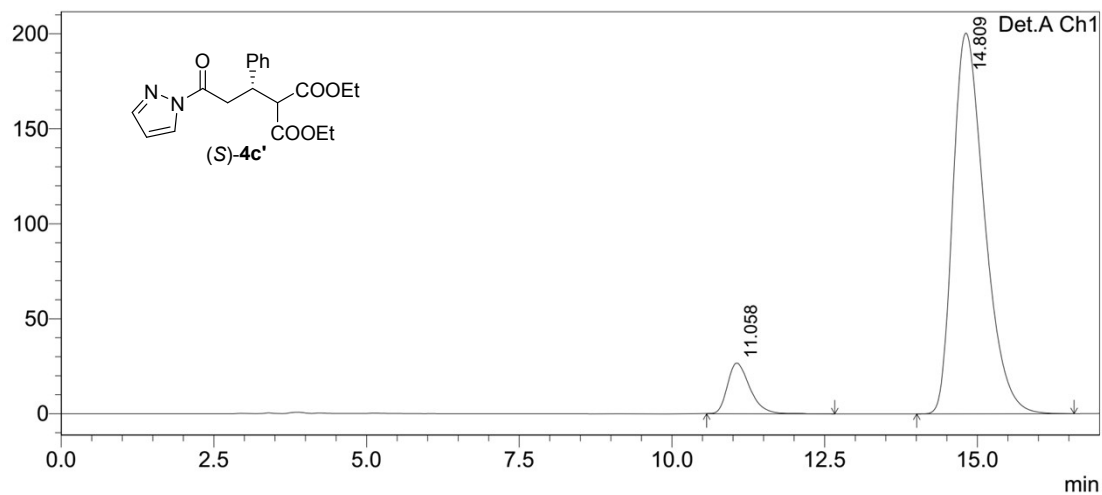

Det.A Ch1/254nm

PeakTable

Detector A Ch1 254nm

| Peak# | Ret. Time | Area    | Height | Area %  | Height % |
|-------|-----------|---------|--------|---------|----------|
| 1     | 11.058    | 681062  | 26701  | 8.646   | 11.753   |
| 2     | 14.809    | 7196471 | 200487 | 91.354  | 88.247   |
| Total |           | 7877534 | 227187 | 100.000 | 100.000  |

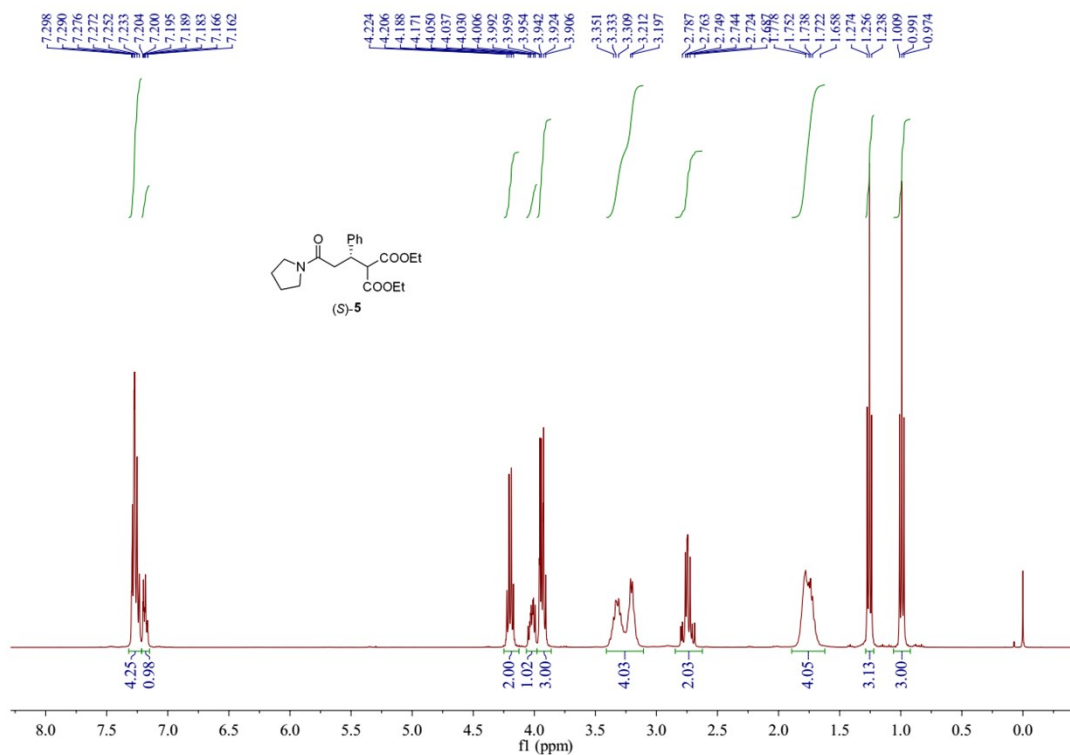

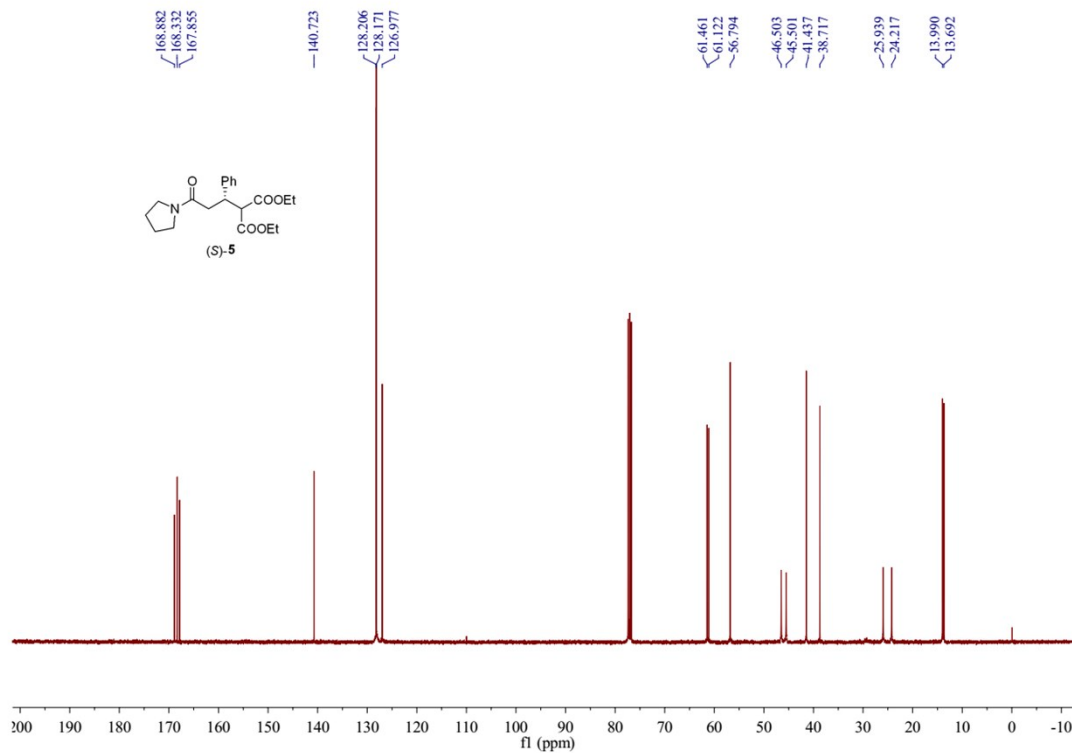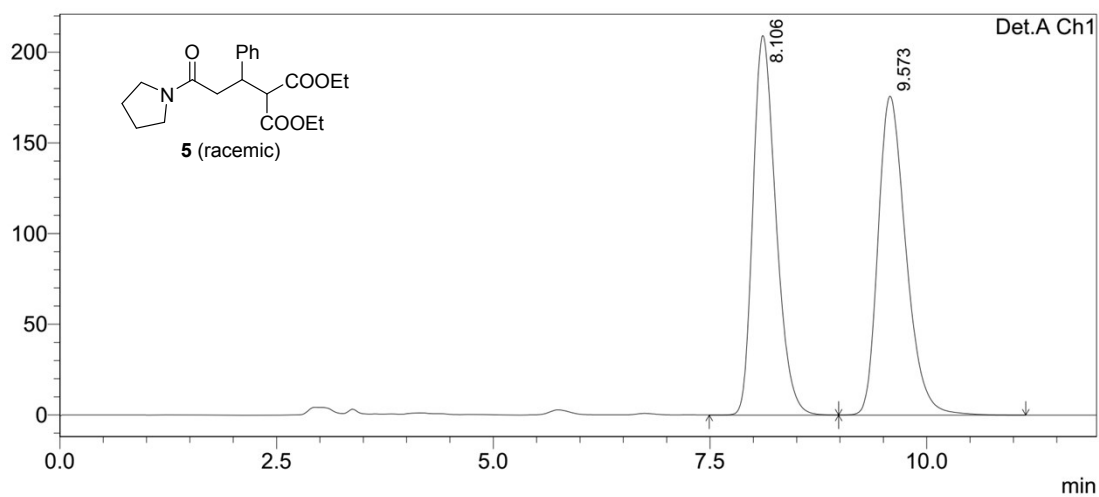

Det.A Ch1/220nm

PeakTable

Detector A Ch1 220nm

| Peak# | Ret. Time | Area    | Height | Area %  | Height % |
|-------|-----------|---------|--------|---------|----------|
| 1     | 8.106     | 3851487 | 209340 | 49.481  | 54.346   |
| 2     | 9.573     | 3932276 | 175862 | 50.519  | 45.654   |
| Total |           | 7783763 | 385202 | 100.000 | 100.000  |

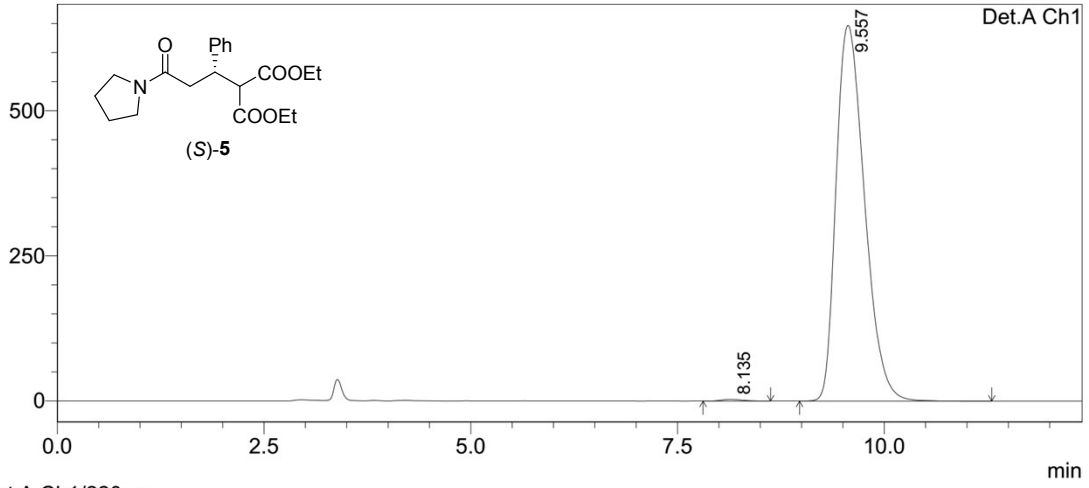

PeakTable

Detector A Ch1 220nm

| Peak# | Ret. Time | Area     | Height | Area %  | Height % |
|-------|-----------|----------|--------|---------|----------|
| 1     | 8.135     | 51642    | 2865   | 0.333   | 0.441    |
| 2     | 9.557     | 15458504 | 647152 | 99.667  | 99.559   |
| Total |           | 15510146 | 650017 | 100.000 | 100.000  |

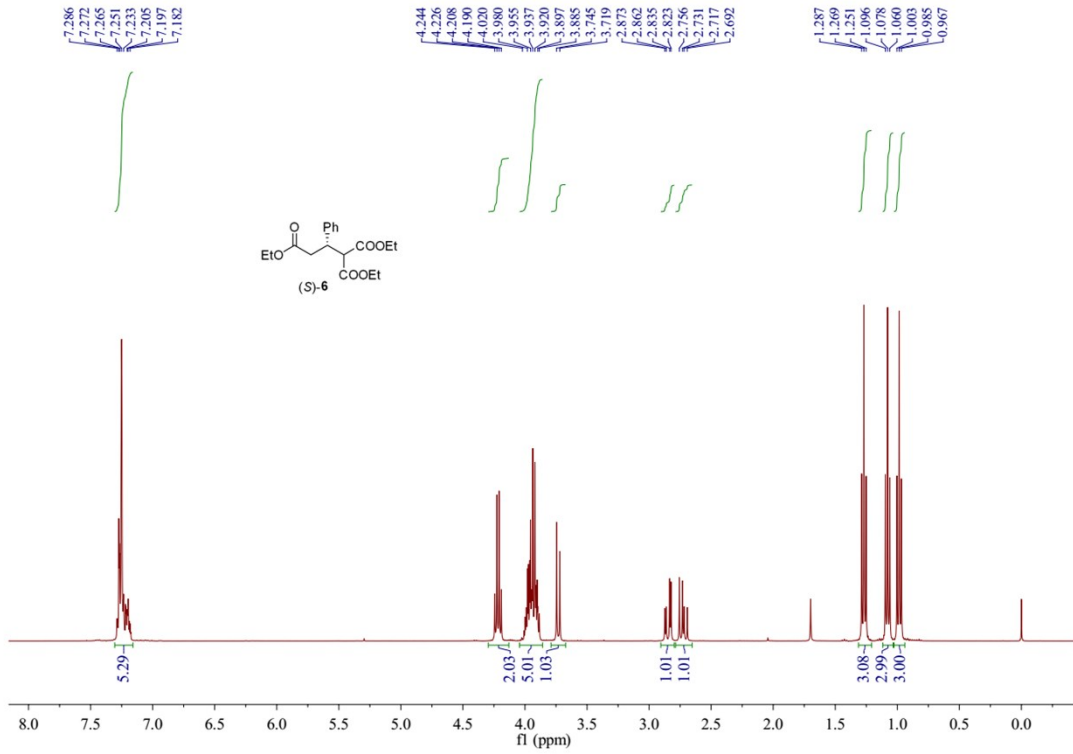

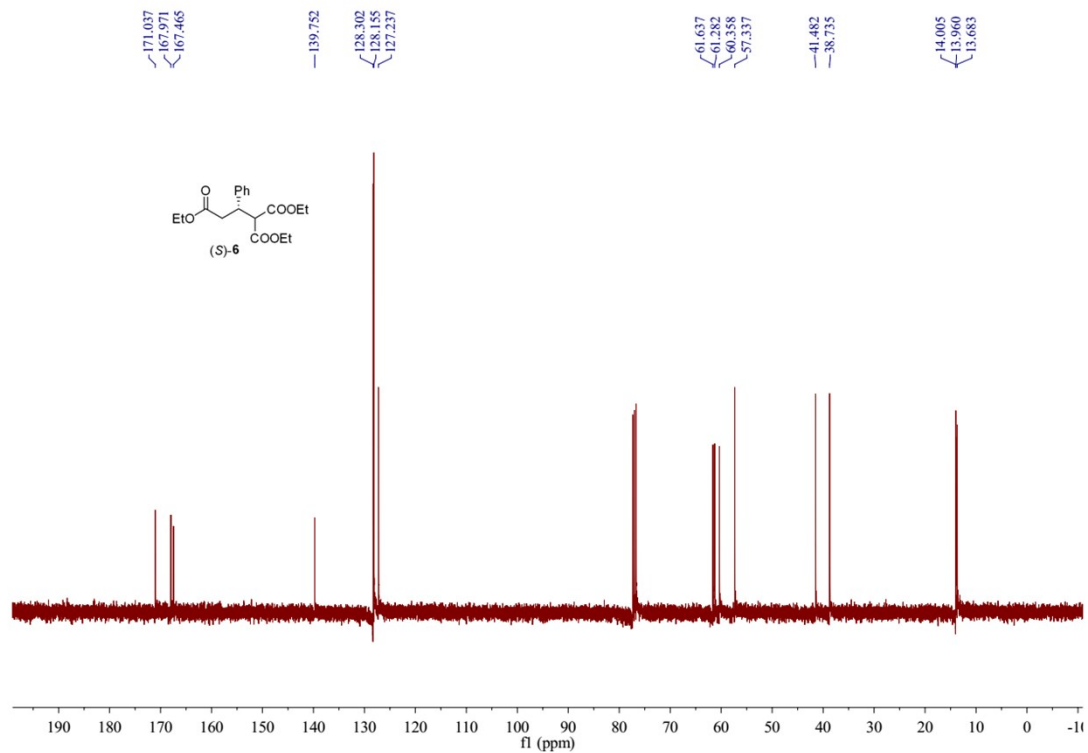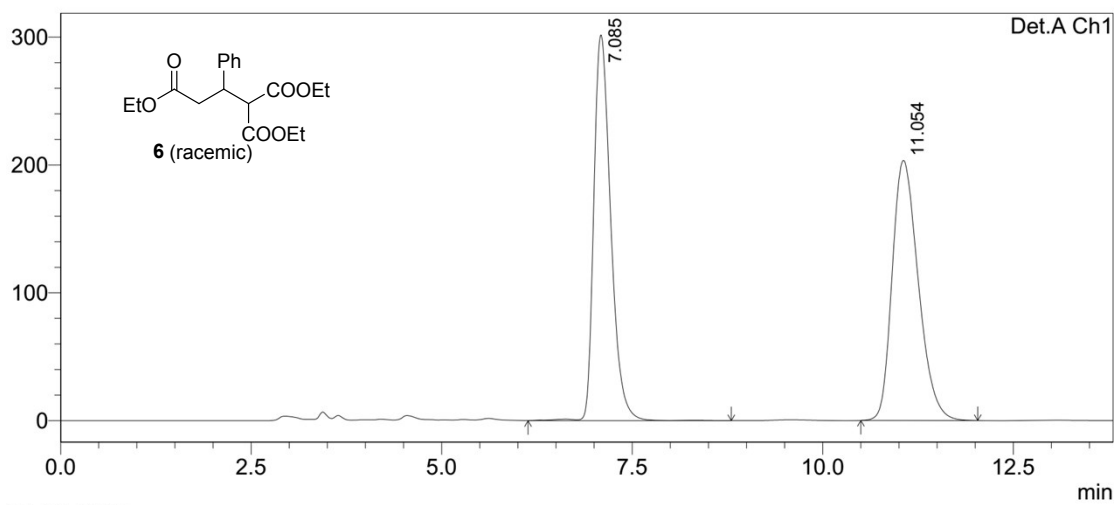

Det.A Ch1/220nm

PeakTable

Detector A Ch1 220nm

| Peak# | Ret. Time | Area    | Height | Area %  | Height % |
|-------|-----------|---------|--------|---------|----------|
| 1     | 7.085     | 4686019 | 301820 | 49.137  | 59.736   |
| 2     | 11.054    | 4850592 | 203435 | 50.863  | 40.264   |
| Total |           | 9536611 | 505255 | 100.000 | 100.000  |

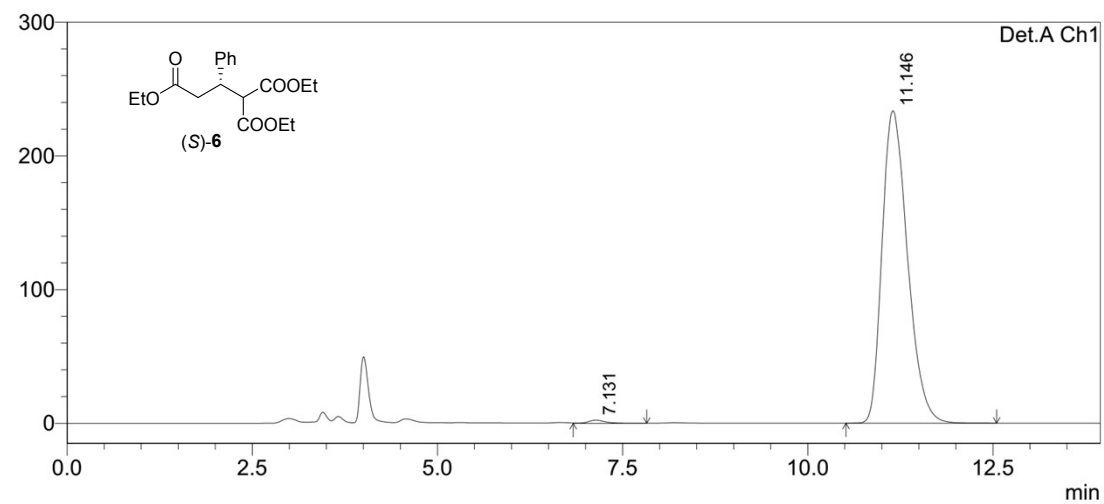

st.A Ch1/220nm

PeakTable

Detector A Ch1 220nm

| Peak# | Ret. Time | Area    | Height | Area %  | Height % |
|-------|-----------|---------|--------|---------|----------|
| 1     | 7.131     | 40348   | 2397   | 0.717   | 1.015    |
| 2     | 11.146    | 5588160 | 233761 | 99.283  | 98.985   |
| Total |           | 5628509 | 236158 | 100.000 | 100.000  |

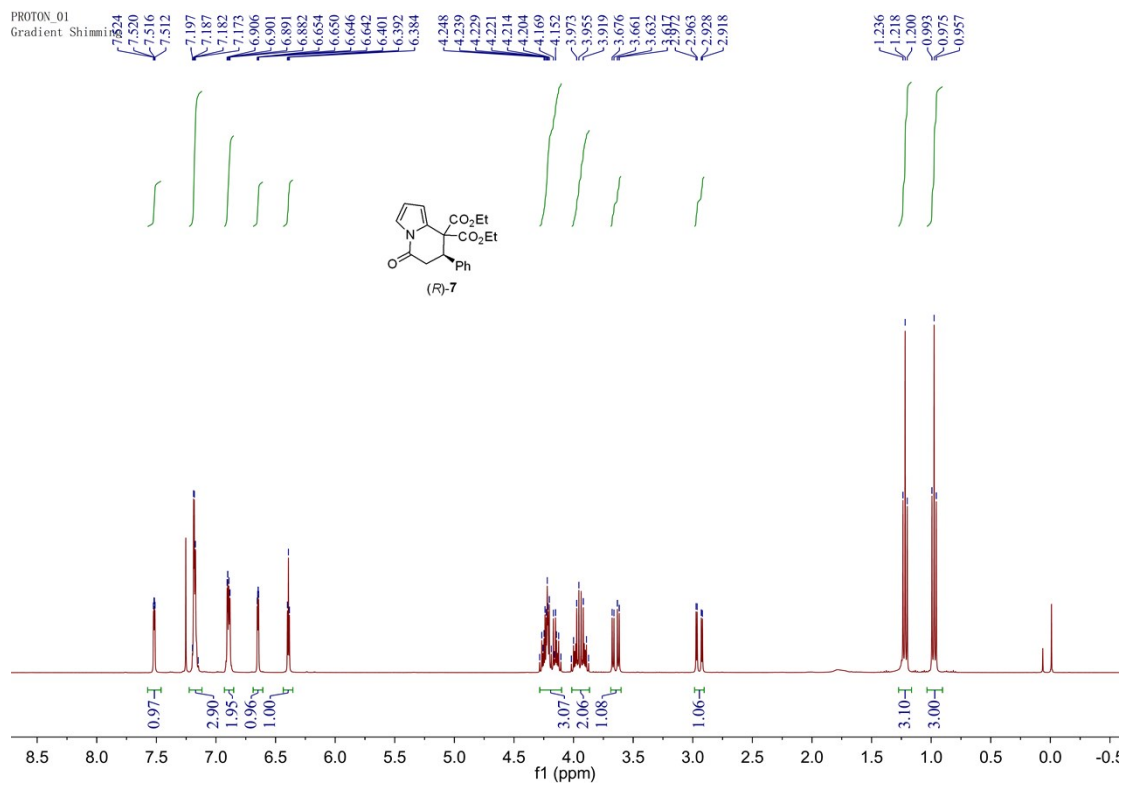

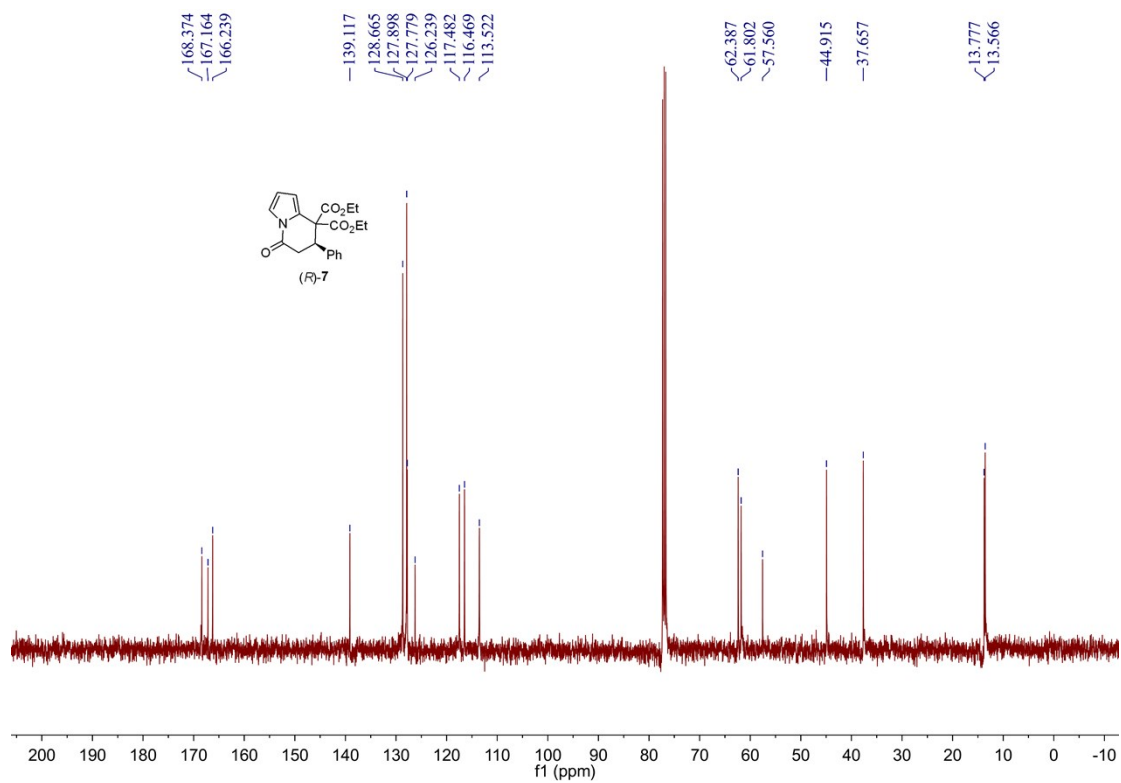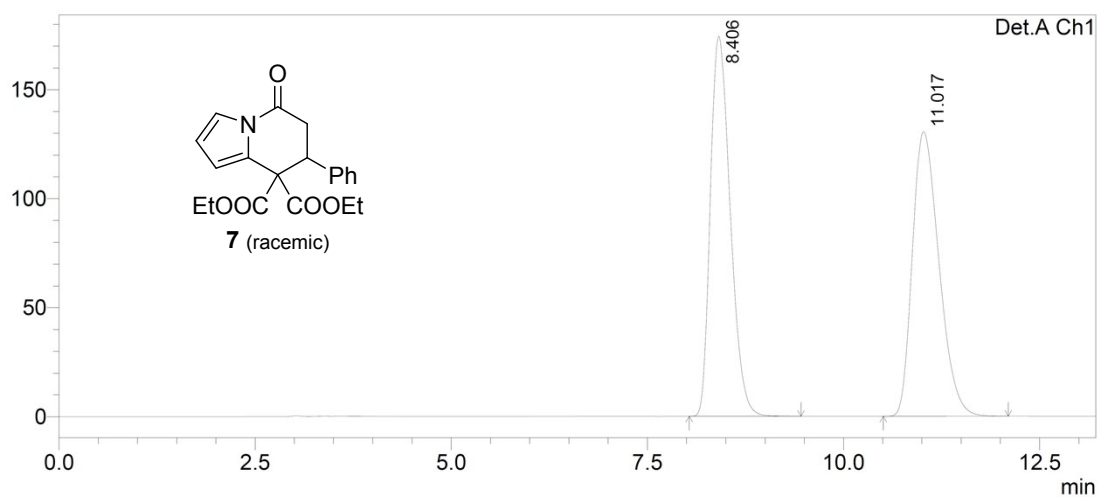

st.A Ch1/254nm

PeakTable

Detector A Ch1 254nm

| Peak# | Ret. Time | Area    | Height | Area %  | Height % |
|-------|-----------|---------|--------|---------|----------|
| 1     | 8.406     | 3083101 | 174358 | 49.968  | 57.199   |
| 2     | 11.017    | 3087005 | 130471 | 50.032  | 42.801   |
| Total |           | 6170107 | 304828 | 100.000 | 100.000  |

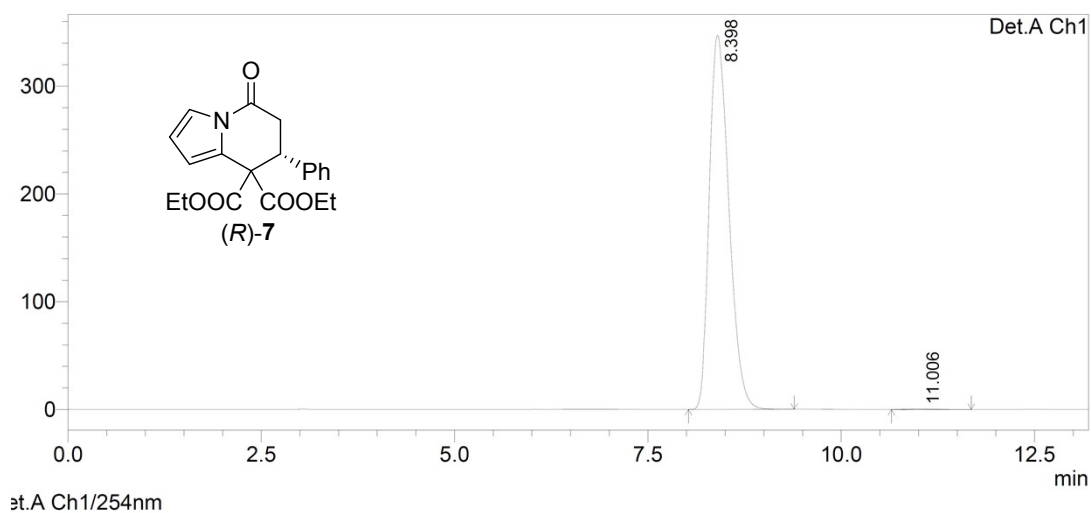

st.A Ch1/254nm

PeakTable

Detector A Ch1 254nm

| Peak# | Ret. Time | Area    | Height | Area %  | Height % |
|-------|-----------|---------|--------|---------|----------|
| 1     | 8.398     | 6152814 | 347216 | 99.811  | 99.854   |
| 2     | 11.006    | 11631   | 507    | 0.189   | 0.146    |
| Total |           | 6164445 | 347724 | 100.000 | 100.000  |

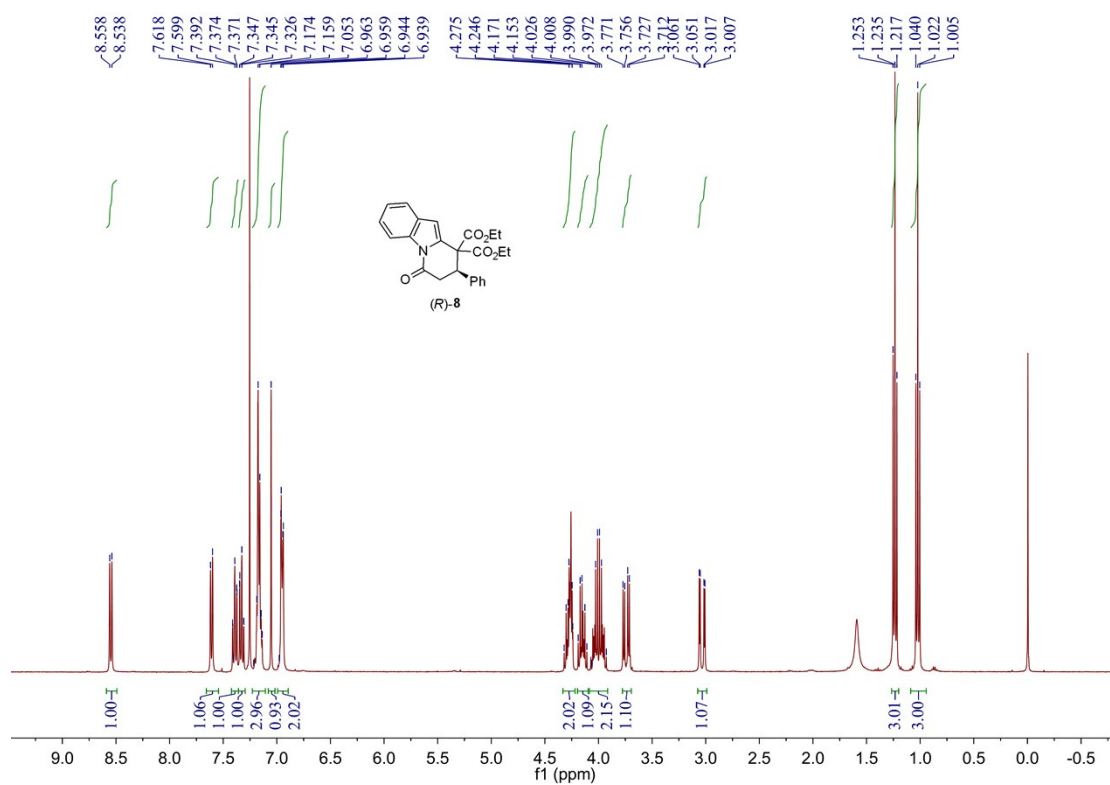

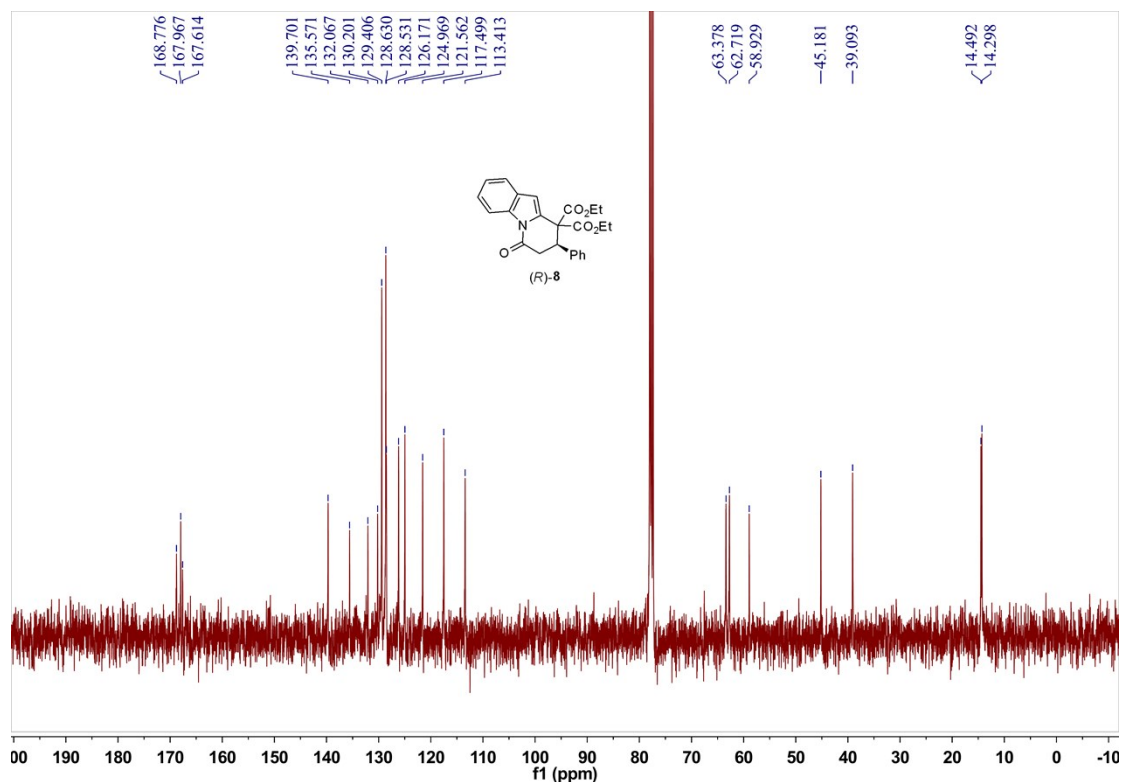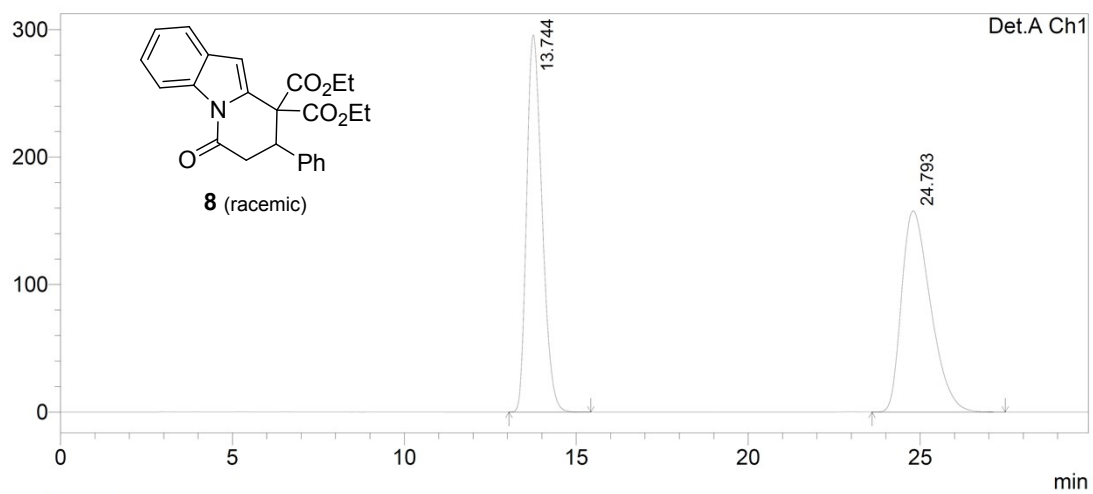

at.A Ch1/254nm

PeakTable

Detector A Ch1 254nm

| Peak# | Ret. Time | Area     | Height | Area %  | Height % |
|-------|-----------|----------|--------|---------|----------|
| 1     | 13.744    | 9227835  | 295997 | 49.893  | 65.210   |
| 2     | 24.793    | 9267539  | 157918 | 50.107  | 34.790   |
| Total |           | 18495374 | 453915 | 100.000 | 100.000  |



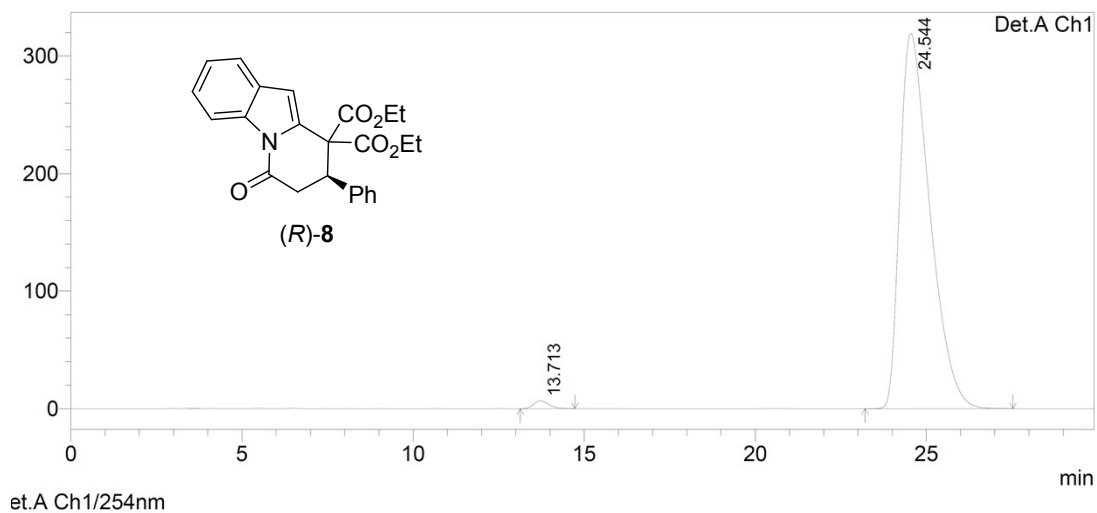

et.A Ch1/254nm

PeakTable

Detector A Ch1 254nm

| Peak# | Ret. Time | Area     | Height | Area %  | Height % |
|-------|-----------|----------|--------|---------|----------|
| 1     | 13.713    | 204686   | 6651   | 1.038   | 2.040    |
| 2     | 24.544    | 19523295 | 319401 | 98.962  | 97.960   |
| Total |           | 19727981 | 326052 | 100.000 | 100.000  |

**The single crystal data of catalyst 3e and the product (S)-4i produced in condition B.**

(1) Catalyst 3e (CCDC 1897269).

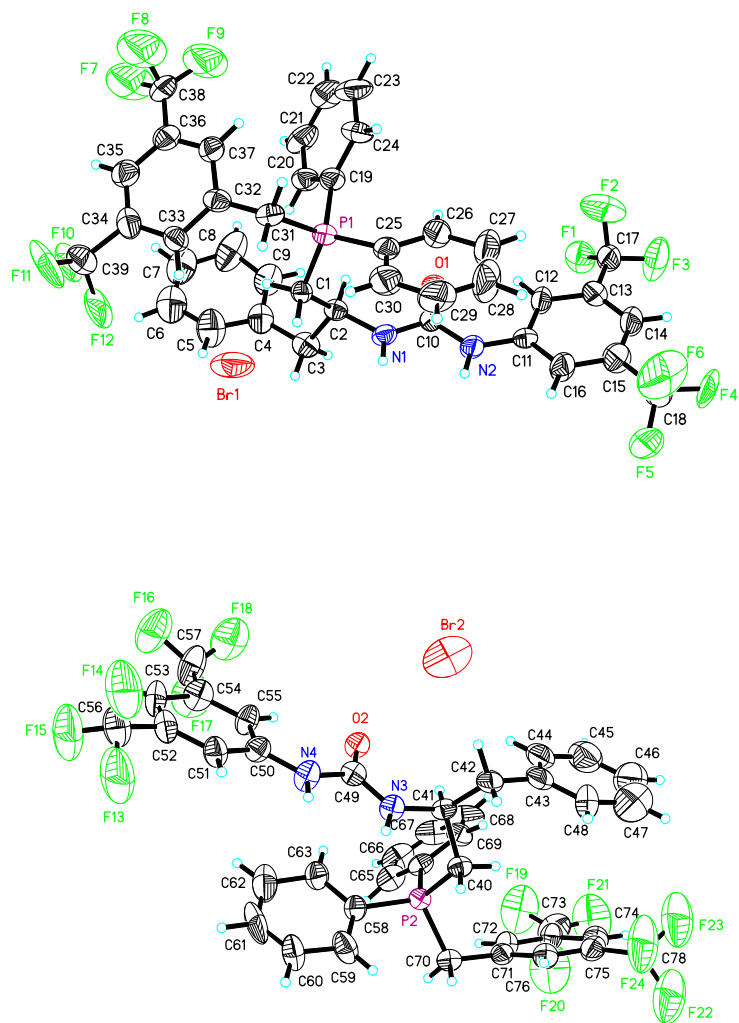

Table 1. Crystal data and structure refinement for 3e.

|                      |                               |                 |
|----------------------|-------------------------------|-----------------|
| Identification code  | 3e                            |                 |
| Empirical formula    | $C_{39}H_{32}BrF_{12}N_2O_2P$ |                 |
| Formula weight       | 899.54                        |                 |
| Temperature          | 296(2) K                      |                 |
| Wavelength           | 0.71073 Å                     |                 |
| Crystal system       | Triclinic                     |                 |
| Space group          | P 1                           |                 |
| Unit cell dimensions | a = 8.7747(4) Å               | a = 72.036(2)°. |
|                      | b = 15.1721(9) Å              | b = 88.944(2)°. |

|                                         |                                                              |                         |
|-----------------------------------------|--------------------------------------------------------------|-------------------------|
|                                         | $c = 16.4580(9) \text{ \AA}$                                 | $g = 84.345(2)^\circ$ . |
| Volume                                  | $2073.94(19) \text{ \AA}^3$                                  |                         |
| Z                                       | 2                                                            |                         |
| Density (calculated)                    | $1.440 \text{ Mg/m}^3$                                       |                         |
| Absorption coefficient                  | $1.119 \text{ mm}^{-1}$                                      |                         |
| F(000)                                  | 908                                                          |                         |
| Crystal size                            | $0.190 \times 0.130 \times 0.080 \text{ mm}^3$               |                         |
| Theta range for data collection         | $2.333 \text{ to } 24.998^\circ$ .                           |                         |
| Index ranges                            | $-10 \leq h \leq 10, -18 \leq k \leq 18, -19 \leq l \leq 19$ |                         |
| Reflections collected                   | 31904                                                        |                         |
| Independent reflections                 | 14162 [R(int) = 0.1088]                                      |                         |
| Completeness to $\theta = 25.242^\circ$ | 97.0 %                                                       |                         |
| Absorption correction                   | Semi-empirical from equivalents                              |                         |
| Max. and min. transmission              | 0.7153 and 0.5531                                            |                         |
| Refinement method                       | Full-matrix least-squares on $F^2$                           |                         |
| Data / restraints / parameters          | 14162 / 186 / 1079                                           |                         |
| Goodness-of-fit on $F^2$                | 1.008                                                        |                         |
| Final R indices [ $I > 2\sigma(I)$ ]    | $R1 = 0.1053, wR2 = 0.2673$                                  |                         |
| R indices (all data)                    | $R1 = 0.1529, wR2 = 0.3269$                                  |                         |
| Absolute structure parameter            | 0.187(13)                                                    |                         |
| Largest diff. peak and hole             | 0.702 and $-0.494 \text{ e. \AA}^{-3}$                       |                         |

(1) The product (*S*)-**4i** produced in condition B. (CCDC 1897272).

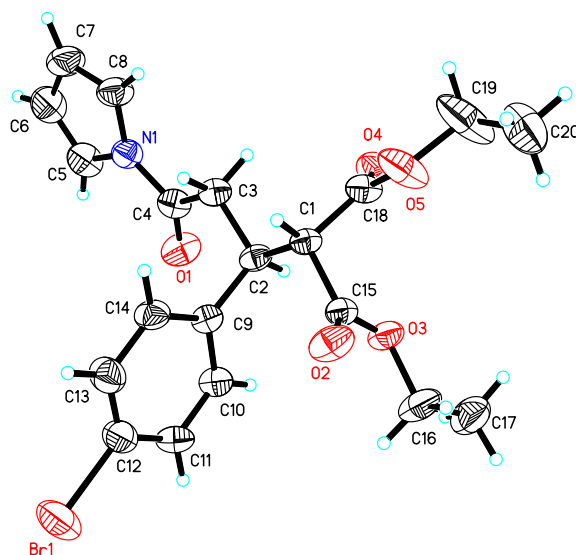

Table 1. Crystal data and structure refinement for (*S*)-**4i**

|                     |                                           |
|---------------------|-------------------------------------------|
| Identification code | ( <i>S</i> )- <b>4i</b>                   |
| Empirical formula   | $\text{C}_{20}\text{H}_{22}\text{BrNO}_5$ |

|                                   |                                             |                  |
|-----------------------------------|---------------------------------------------|------------------|
| Formula weight                    | 436.29                                      |                  |
| Temperature                       | 296(2) K                                    |                  |
| Wavelength                        | 0.71073 Å                                   |                  |
| Crystal system                    | Monoclinic                                  |                  |
| Space group                       | P 21                                        |                  |
| Unit cell dimensions              | a = 12.3447(10) Å                           | a = 90°.         |
|                                   | b = 5.5630(5) Å                             | b = 104.256(2)°. |
|                                   | c = 17.4342(15) Å                           | g = 90°.         |
| Volume                            | 1160.40(17) Å <sup>3</sup>                  |                  |
| Z                                 | 2                                           |                  |
| Density (calculated)              | 1.249 Mg/m <sup>3</sup>                     |                  |
| Absorption coefficient            | 1.797 mm <sup>-1</sup>                      |                  |
| F(000)                            | 448                                         |                  |
| Crystal size                      | 0.170 x 0.140 x 0.100 mm <sup>3</sup>       |                  |
| Theta range for data collection   | 1.702 to 25.496°.                           |                  |
| Index ranges                      | -14 ≤ h ≤ 14, -6 ≤ k ≤ 6, -21 ≤ l ≤ 21      |                  |
| Reflections collected             | 16833                                       |                  |
| Independent reflections           | 4286 [R(int) = 0.0491]                      |                  |
| Completeness to theta = 25.242°   | 99.9 %                                      |                  |
| Absorption correction             | Semi-empirical from equivalents             |                  |
| Max. and min. transmission        | 0.7456 and 0.6022                           |                  |
| Refinement method                 | Full-matrix least-squares on F <sup>2</sup> |                  |
| Data / restraints / parameters    | 4286 / 1 / 247                              |                  |
| Goodness-of-fit on F <sup>2</sup> | 0.989                                       |                  |
| Final R indices [I > 2σ(I)]       | R1 = 0.0472, wR2 = 0.1126                   |                  |
| R indices (all data)              | R1 = 0.0859, wR2 = 0.1270                   |                  |
| Absolute structure parameter      | 0.023(8)                                    |                  |
| Extinction coefficient            | 0.011(3)                                    |                  |
| Largest diff. peak and hole       | 0.401 and -0.323 e.Å <sup>-3</sup>          |                  |
